# Supplementary material for: Network Pharmacology of Red Ginseng (Part I): Effects of Ginsenoside Rg5 at Physiological and Sub-Physiological Concentrations
Source: Preprints.org preprint supplement (doi:10.20944/preprints202109.0281.v1), 2021-09-16

100  $\mu$ M

Cellular senescence is an anti-proliferative program that restricts the propagation of cells subjected to different kinds of stress. Senescence has important role in numerous biological processes such as maintenance of tissue homeostasis, wound healing, embryonic development and also is implicated in organismal aging, in development of age-related diseases and cancer progression. These detrimental effects are primarily driven by the pro-inflammatory and hyper-secretory phenotype of senescent cells.

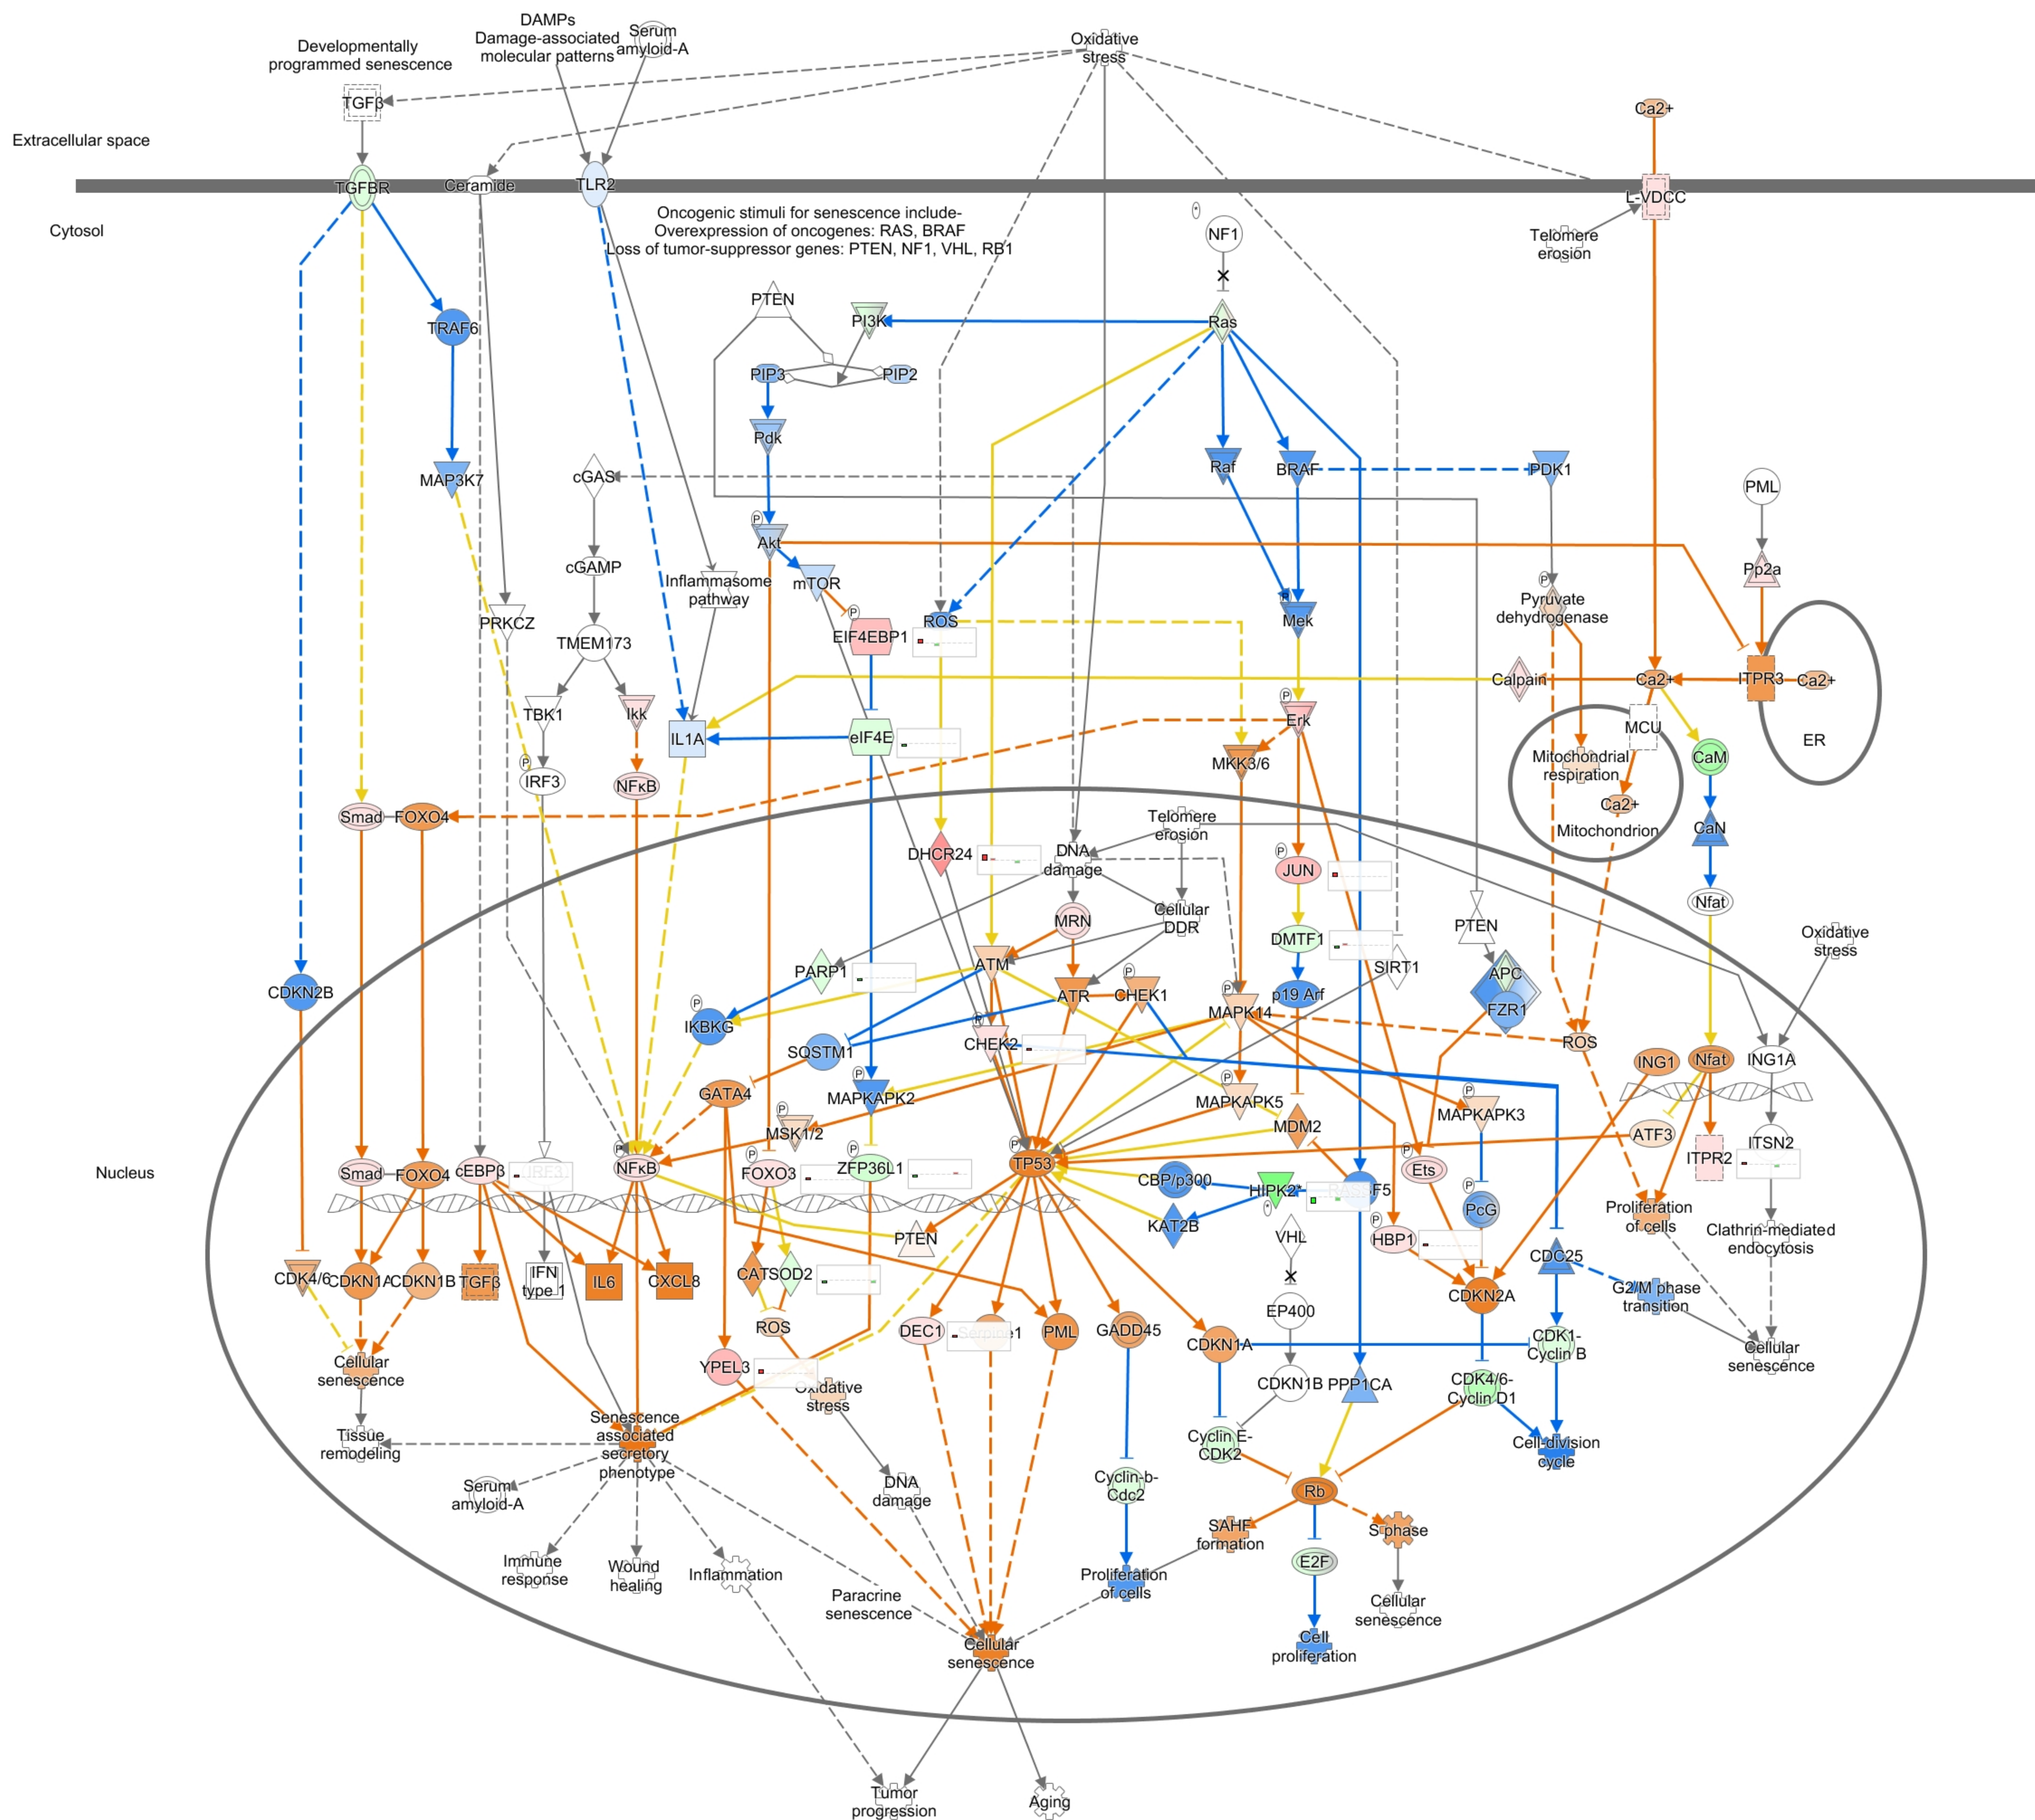



Cellular senescence is an anti-proliferative program that restricts the propagation of cells subjected to different kinds of stress. Senescence has important role in numerous biological processes such as maintenance of tissue homeostasis, wound healing, embryonic development and also is implicated in organismal aging, in development of age-related diseases and cancer progression. These detrimental effects are primarily driven by the pro-inflammatory and hyper-secretory phenotype of senescent cells.

1  $\mu$ M

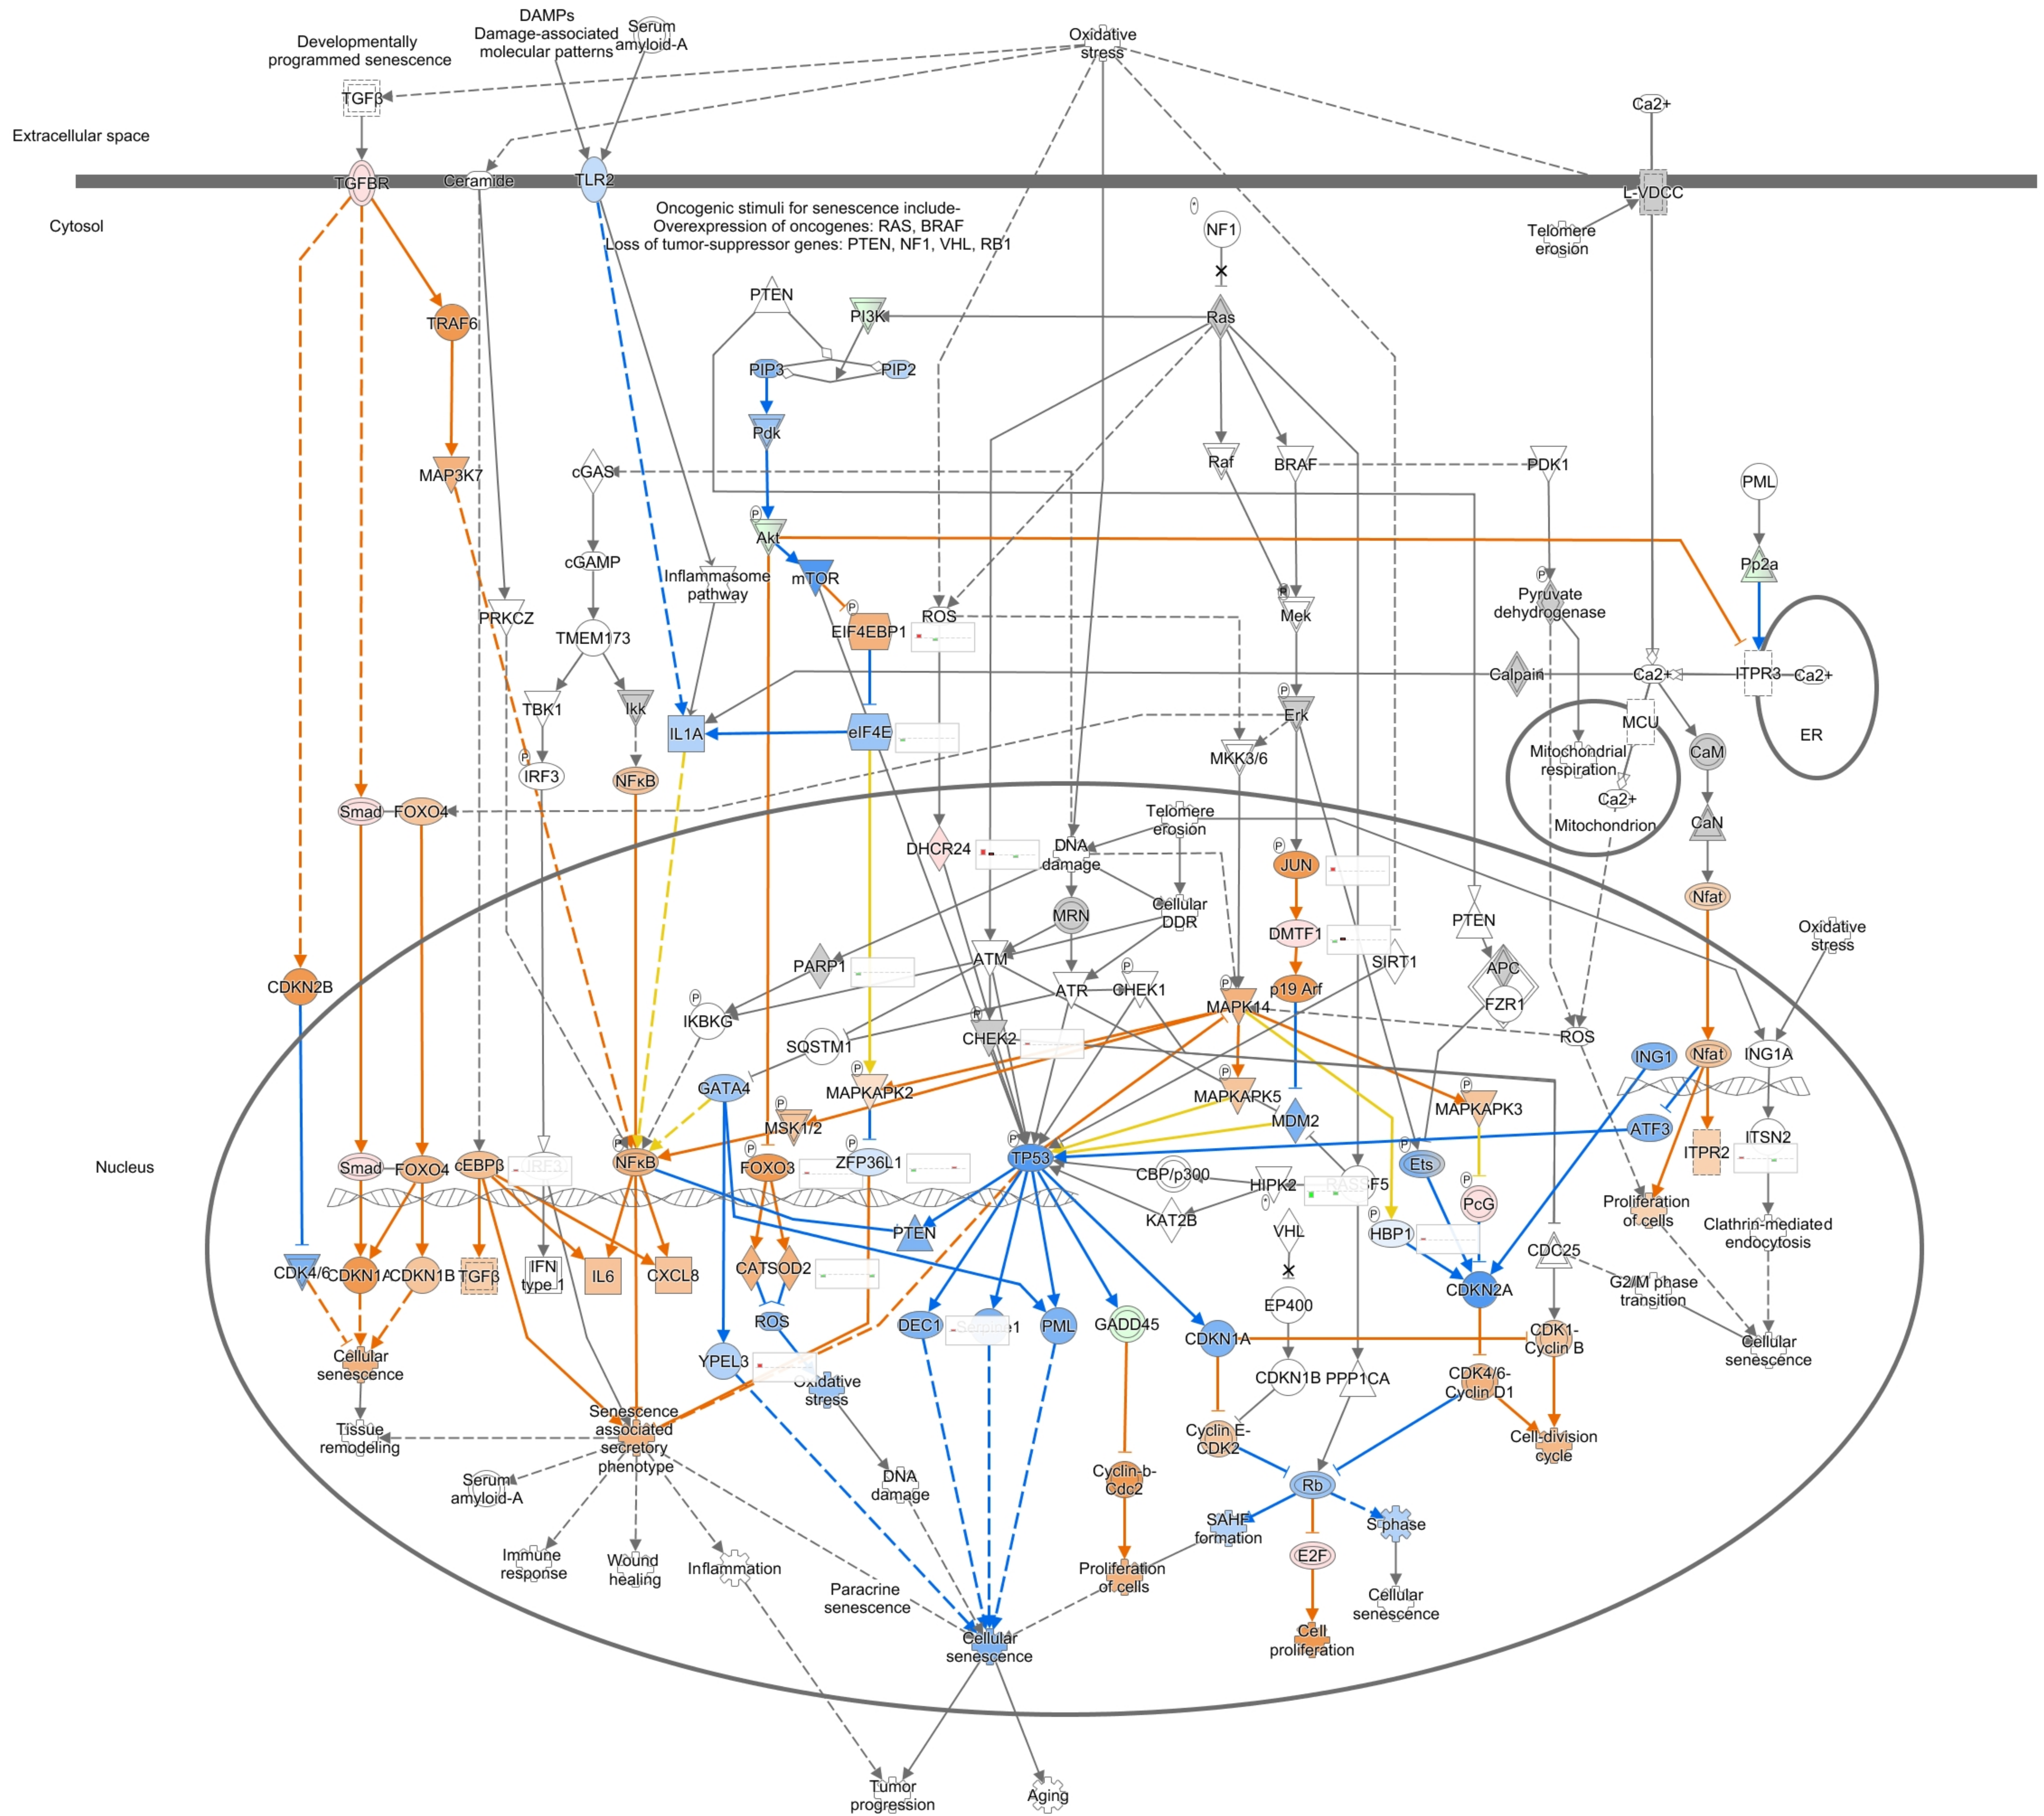











Cellular senescence is an anti-proliferative program that restricts the propagation of cells subjected to different kinds of stress. Senescence has important role in numerous biological processes such as maintenance of tissue homeostasis, wound healing, embryonic development and also is implicated in organismal aging, in development of age-related diseases and cancer progression. These detrimental effects are primarily driven by the pro-inflammatory and hyper-secretory phenotype of senescent cells.

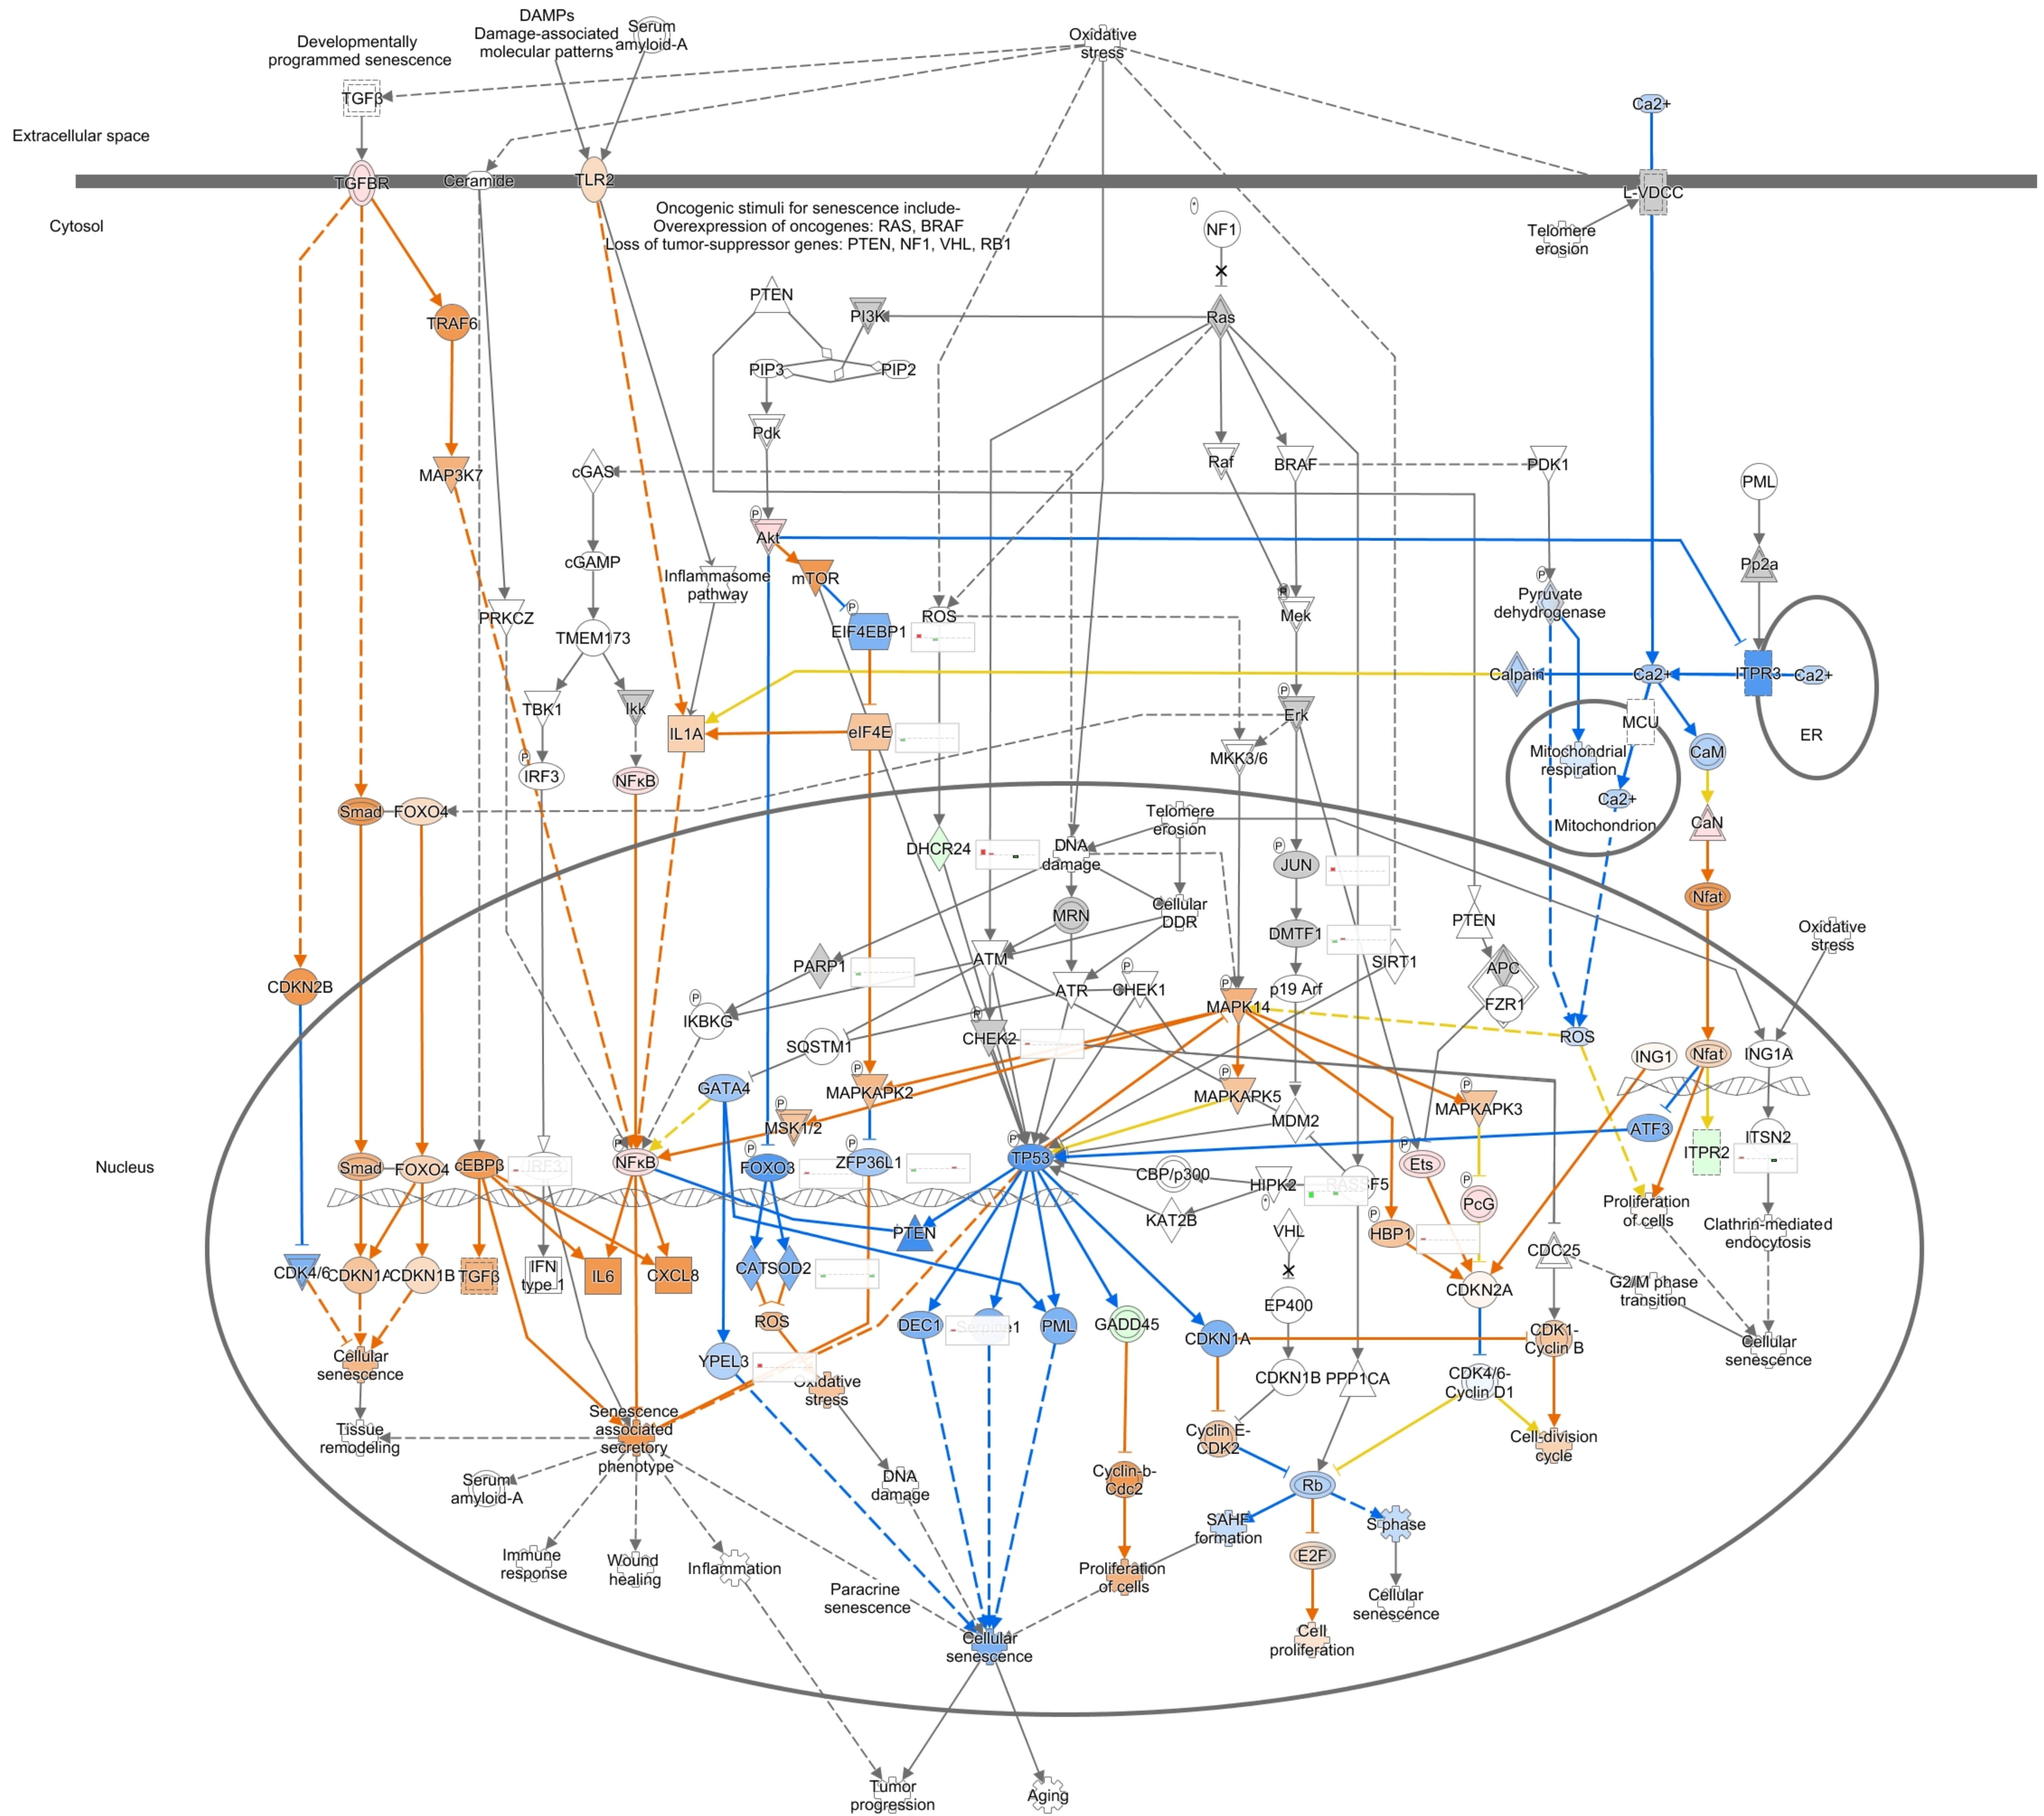



Cellular senescence is an anti-proliferative program that restricts the propagation of cells subjected to different kinds of stress. Senescence has important role in numerous biological processes such as maintenance of tissue homeostasis, wound healing, embryonic development and also is implicated in organismal aging, in development of age-related diseases and cancer progression. These detrimental effects are primarily driven by the pro-inflammatory and hyper-secretory phenotype of senescent cells.

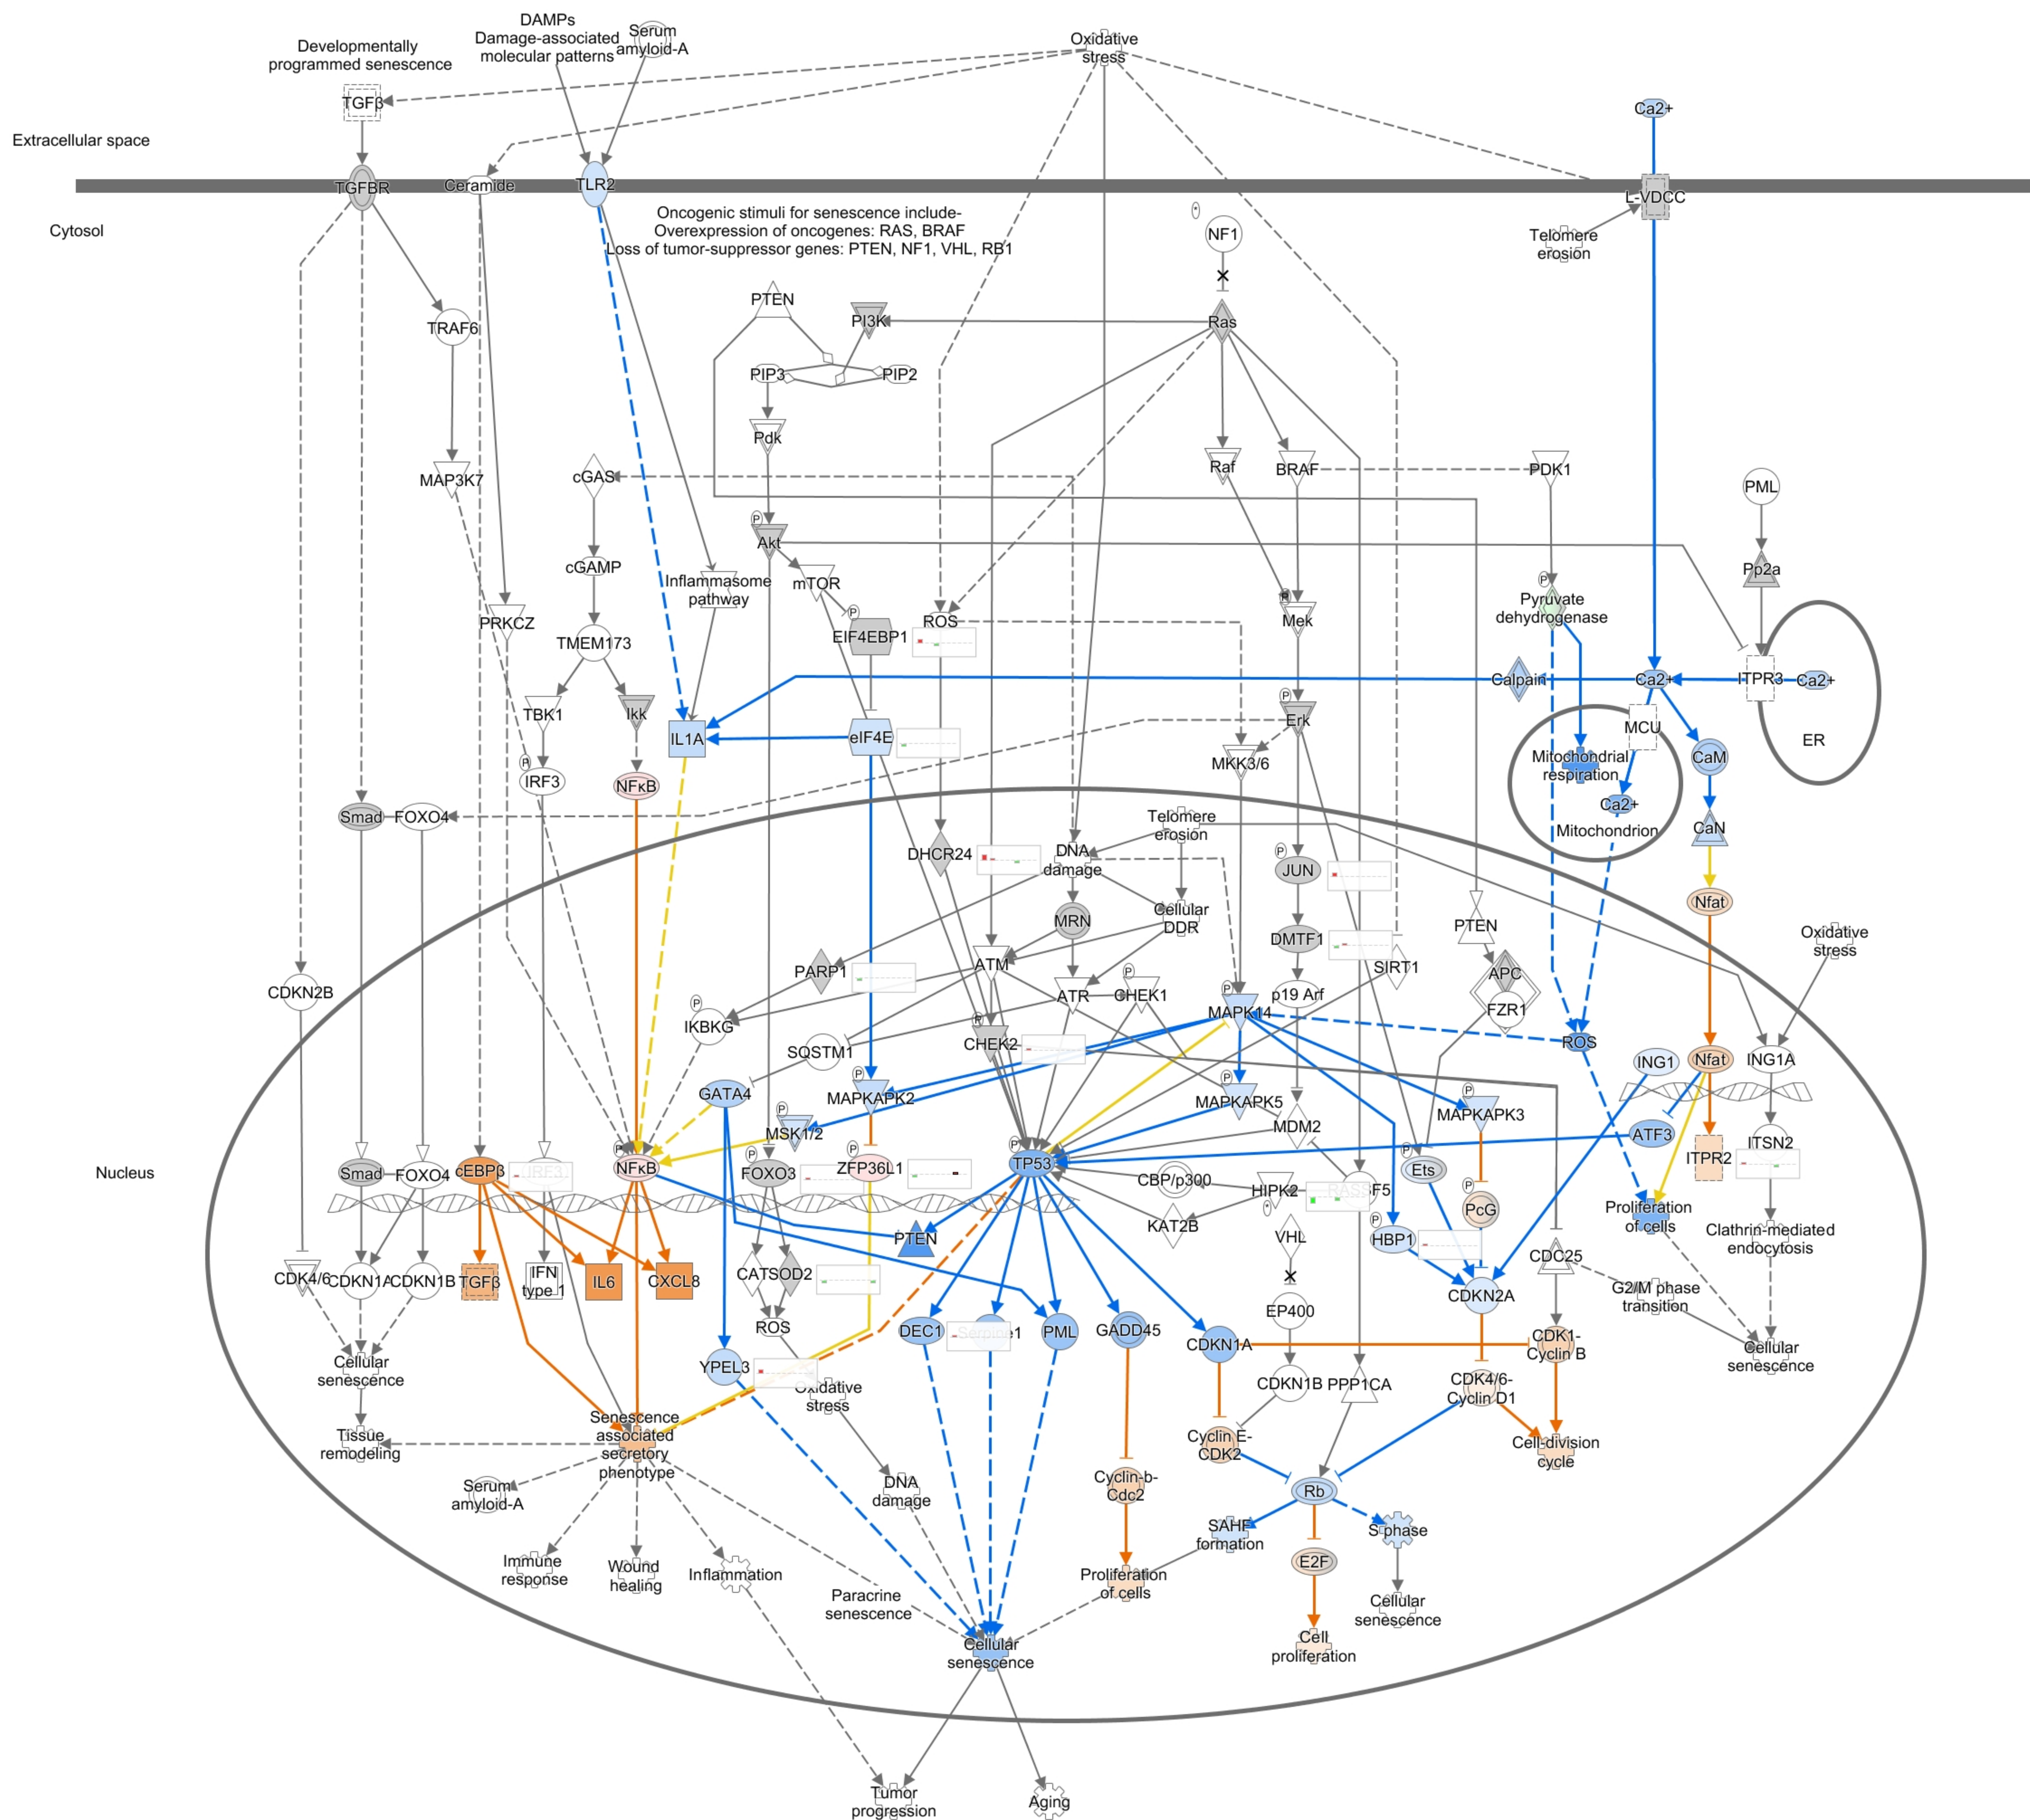



Cellular senescence is an anti-proliferative program that restricts the propagation of cells subjected to different kinds of stress. Senescence has important role in numerous biological processes such as maintenance of tissue homeostasis, wound healing, embryonic development and also is implicated in organismal aging, in development of age-related diseases and cancer progression. These detrimental effects are primarily driven by the pro-inflammatory and hyper-secretory phenotype of senescent cells.

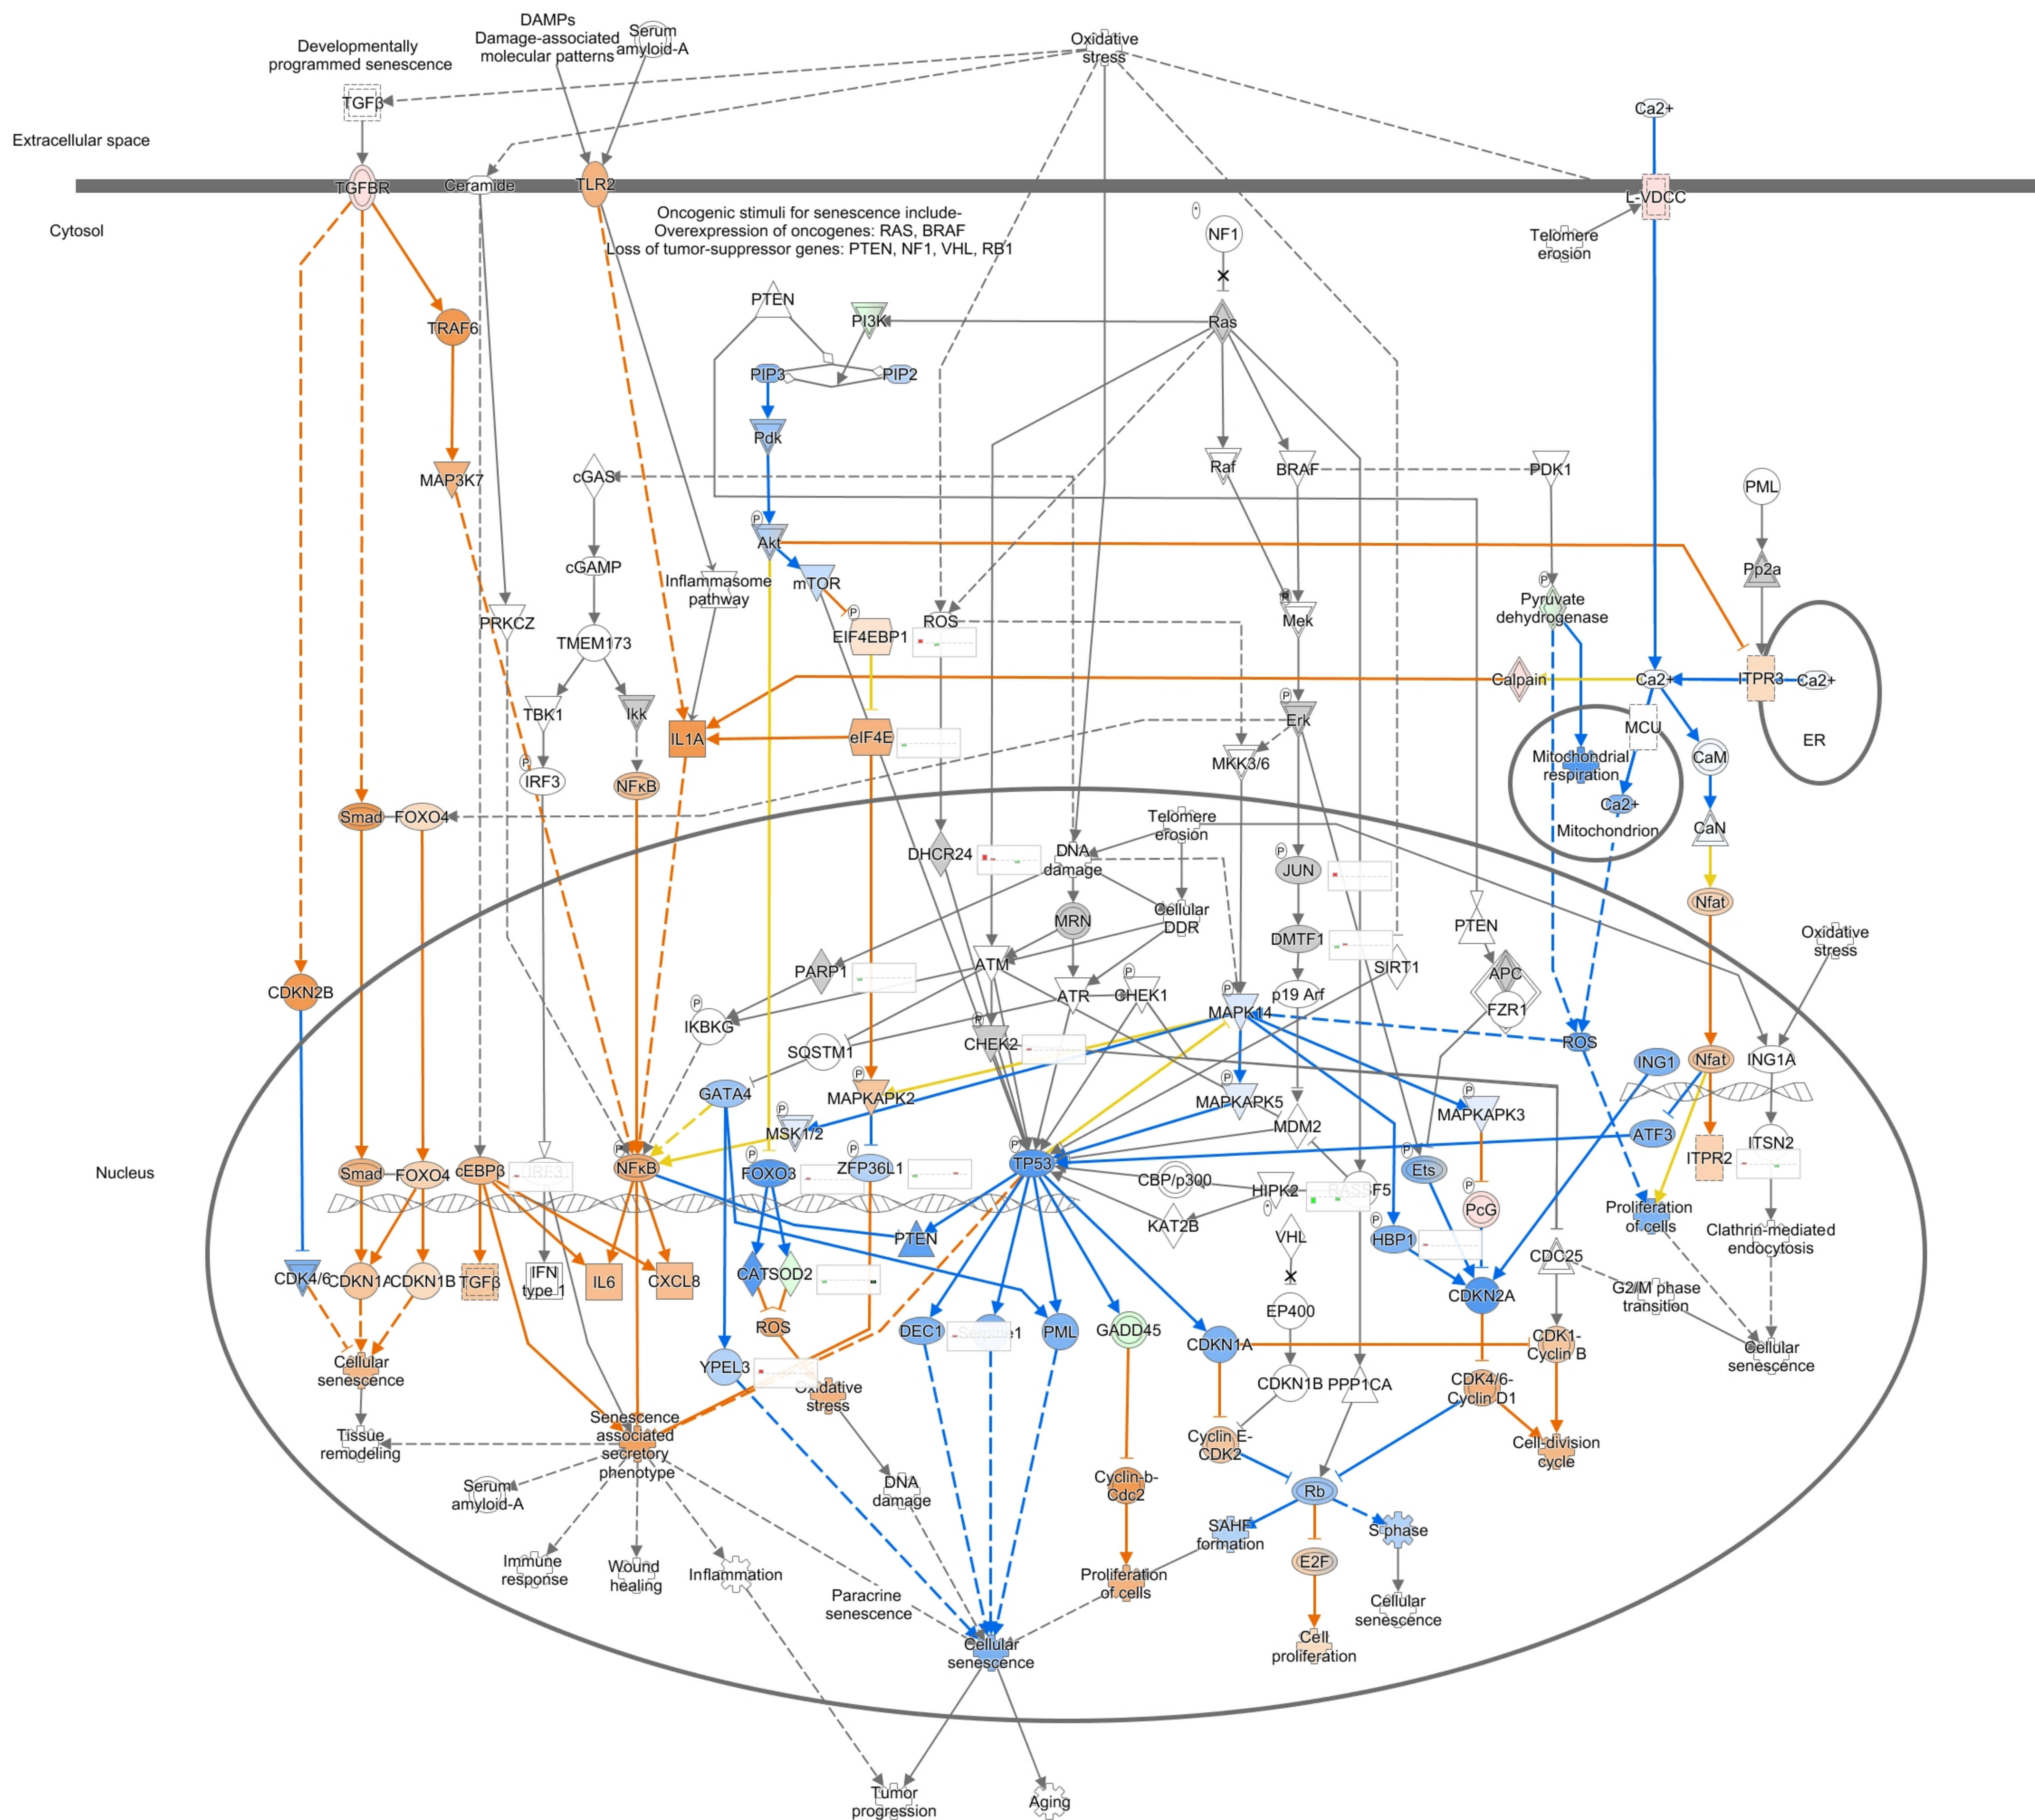

Supplement: Supplementary file 5 [file supplementary]
