# Supplementary material for: Network Pharmacology of Red Ginseng (Part I): Effects of Ginsenoside Rg5 at Physiological and Sub-Physiological Concentrations
Source: Preprints.org preprint supplement (doi:10.20944/preprints202109.0281.v1), 2021-09-16

Sirtuins are class III histone deacetylase enzymes that use NAD<sup>+</sup> as a co-substrate for their enzymatic activities. In mammals, there are 7 sirtuin members (SIRT1-7), which play important roles in aging, metabolism, cancer, inflammation, DNA repair and cellular responses to stress.

100  $\mu$ M

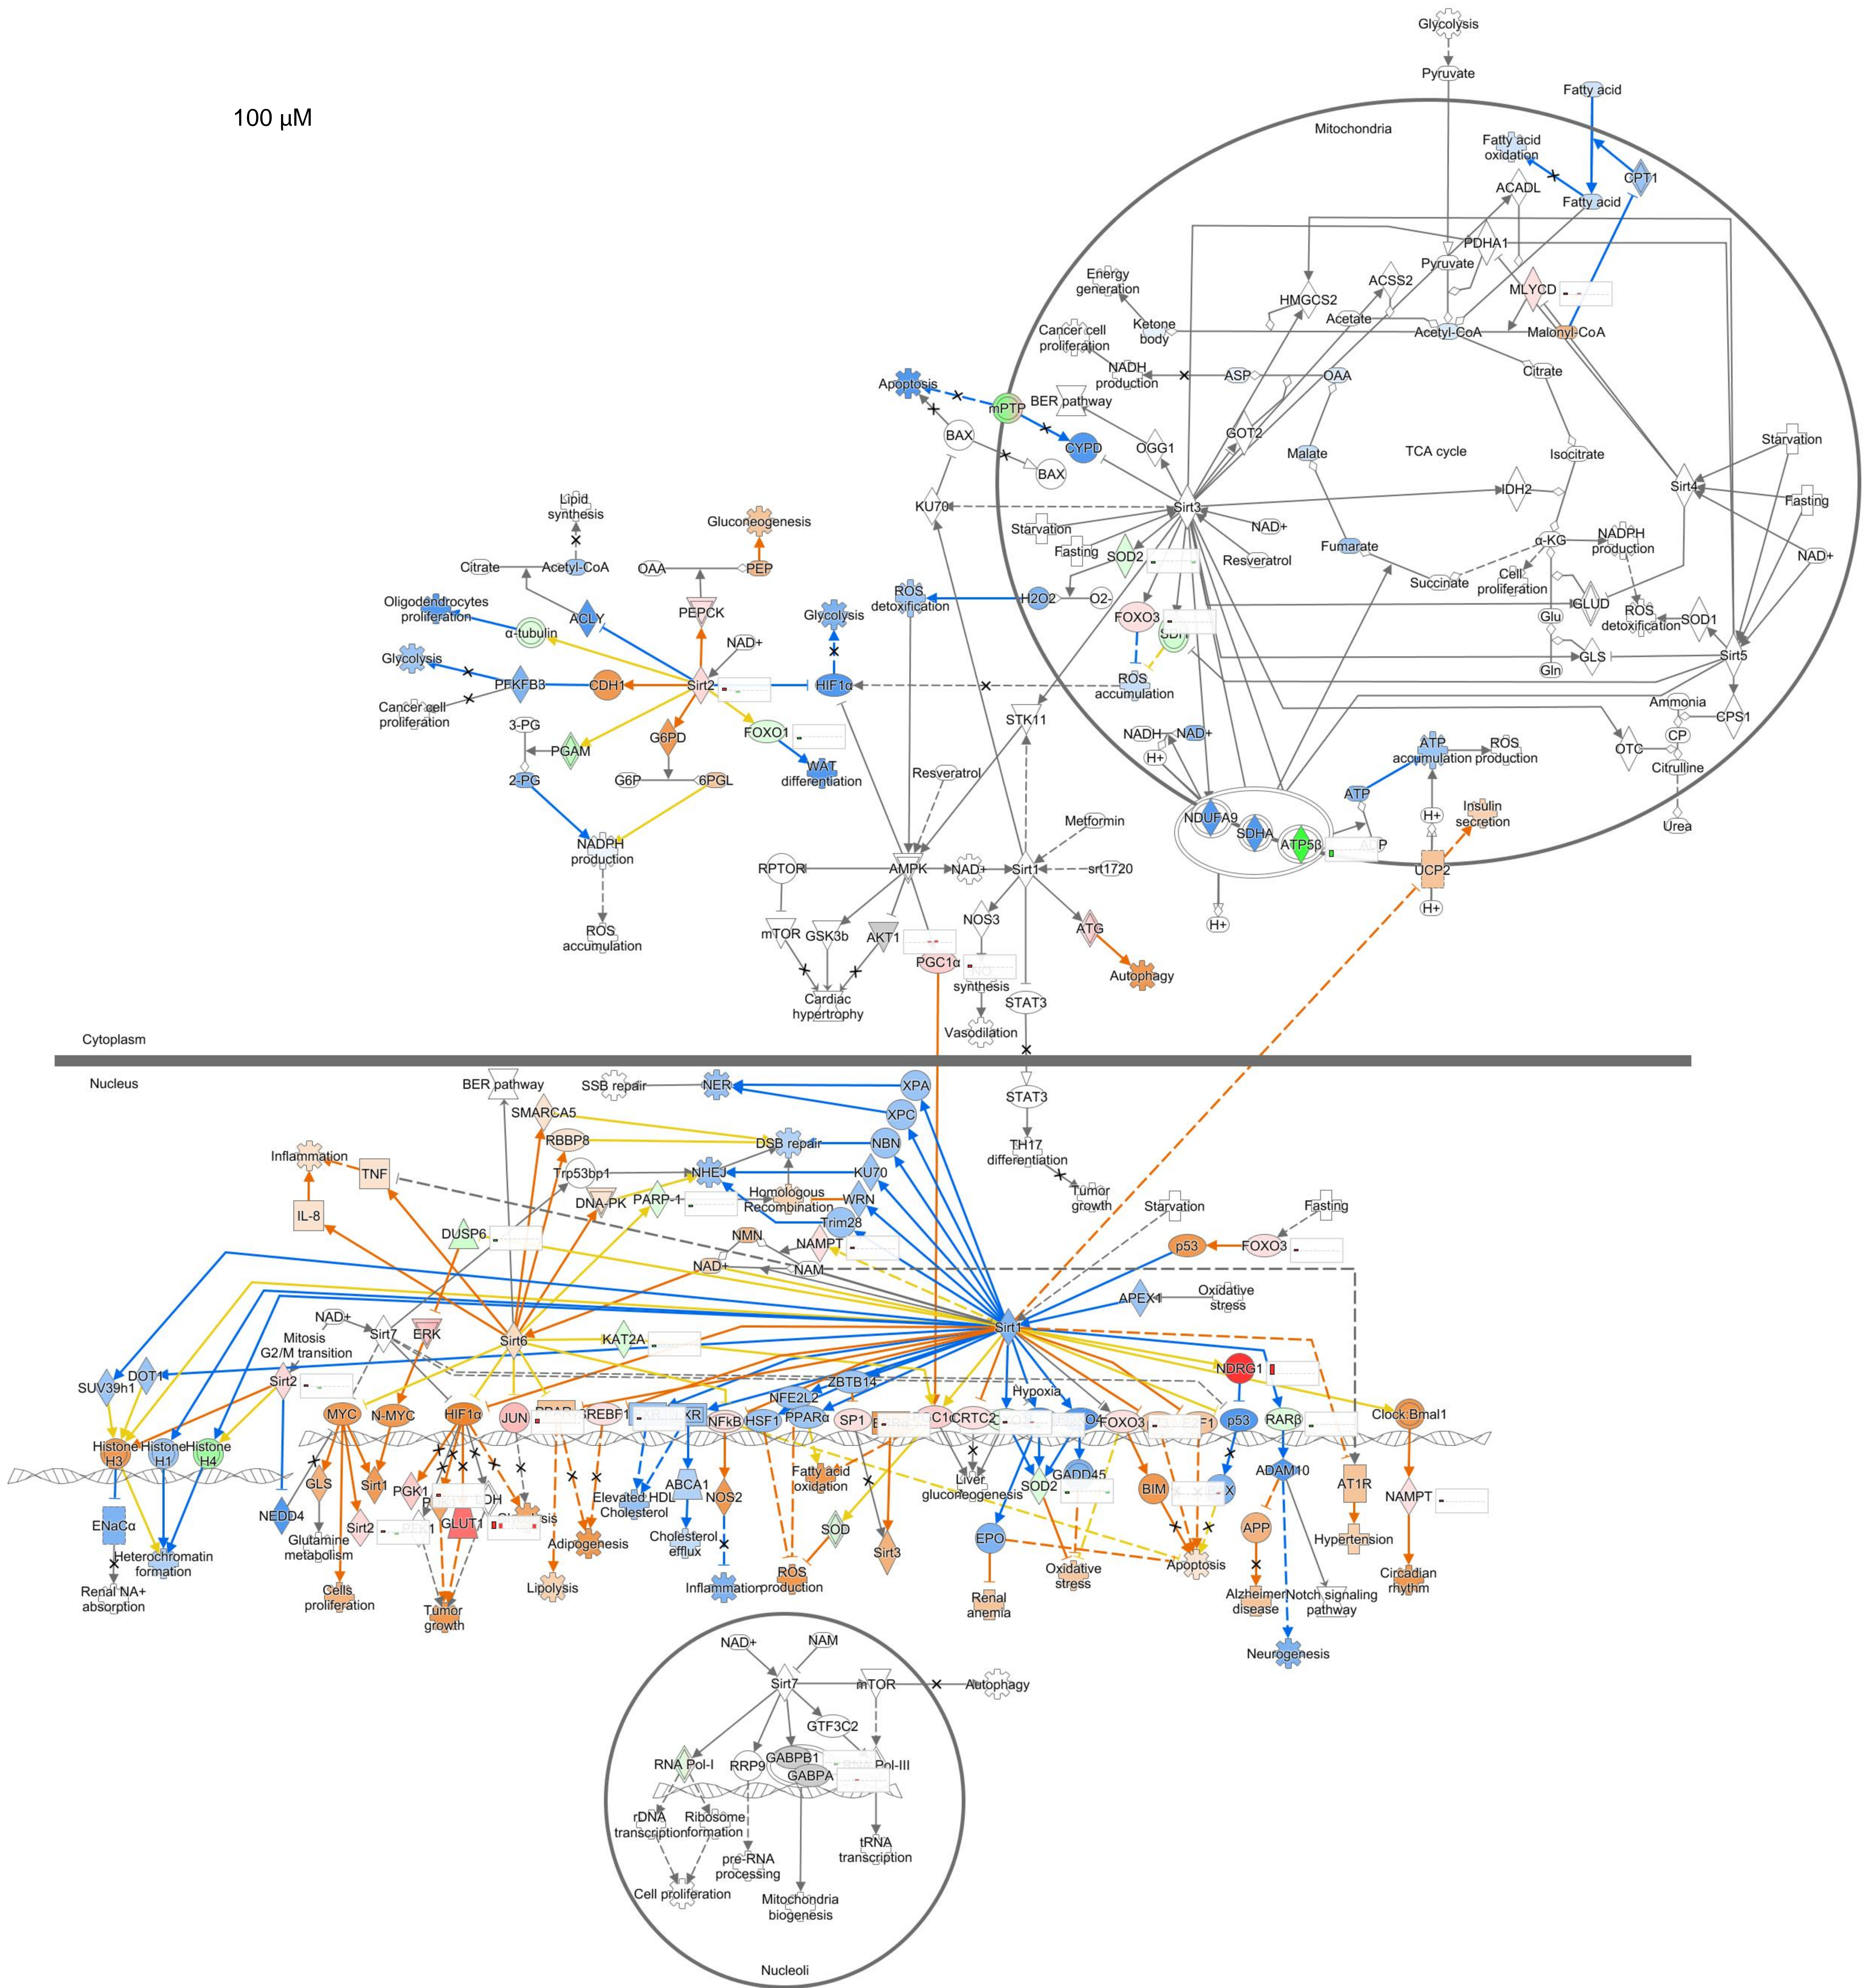



Sirtuins are class III histone deacetylase enzymes that use NAD<sup>+</sup> as a co-substrate for their enzymatic activities. In mammals, there are 7 sirtuin members (SIRT1-7), which play important roles in aging, metabolism, cancer, inflammation, DNA repair and cellular responses to stress.

1  $\mu$ M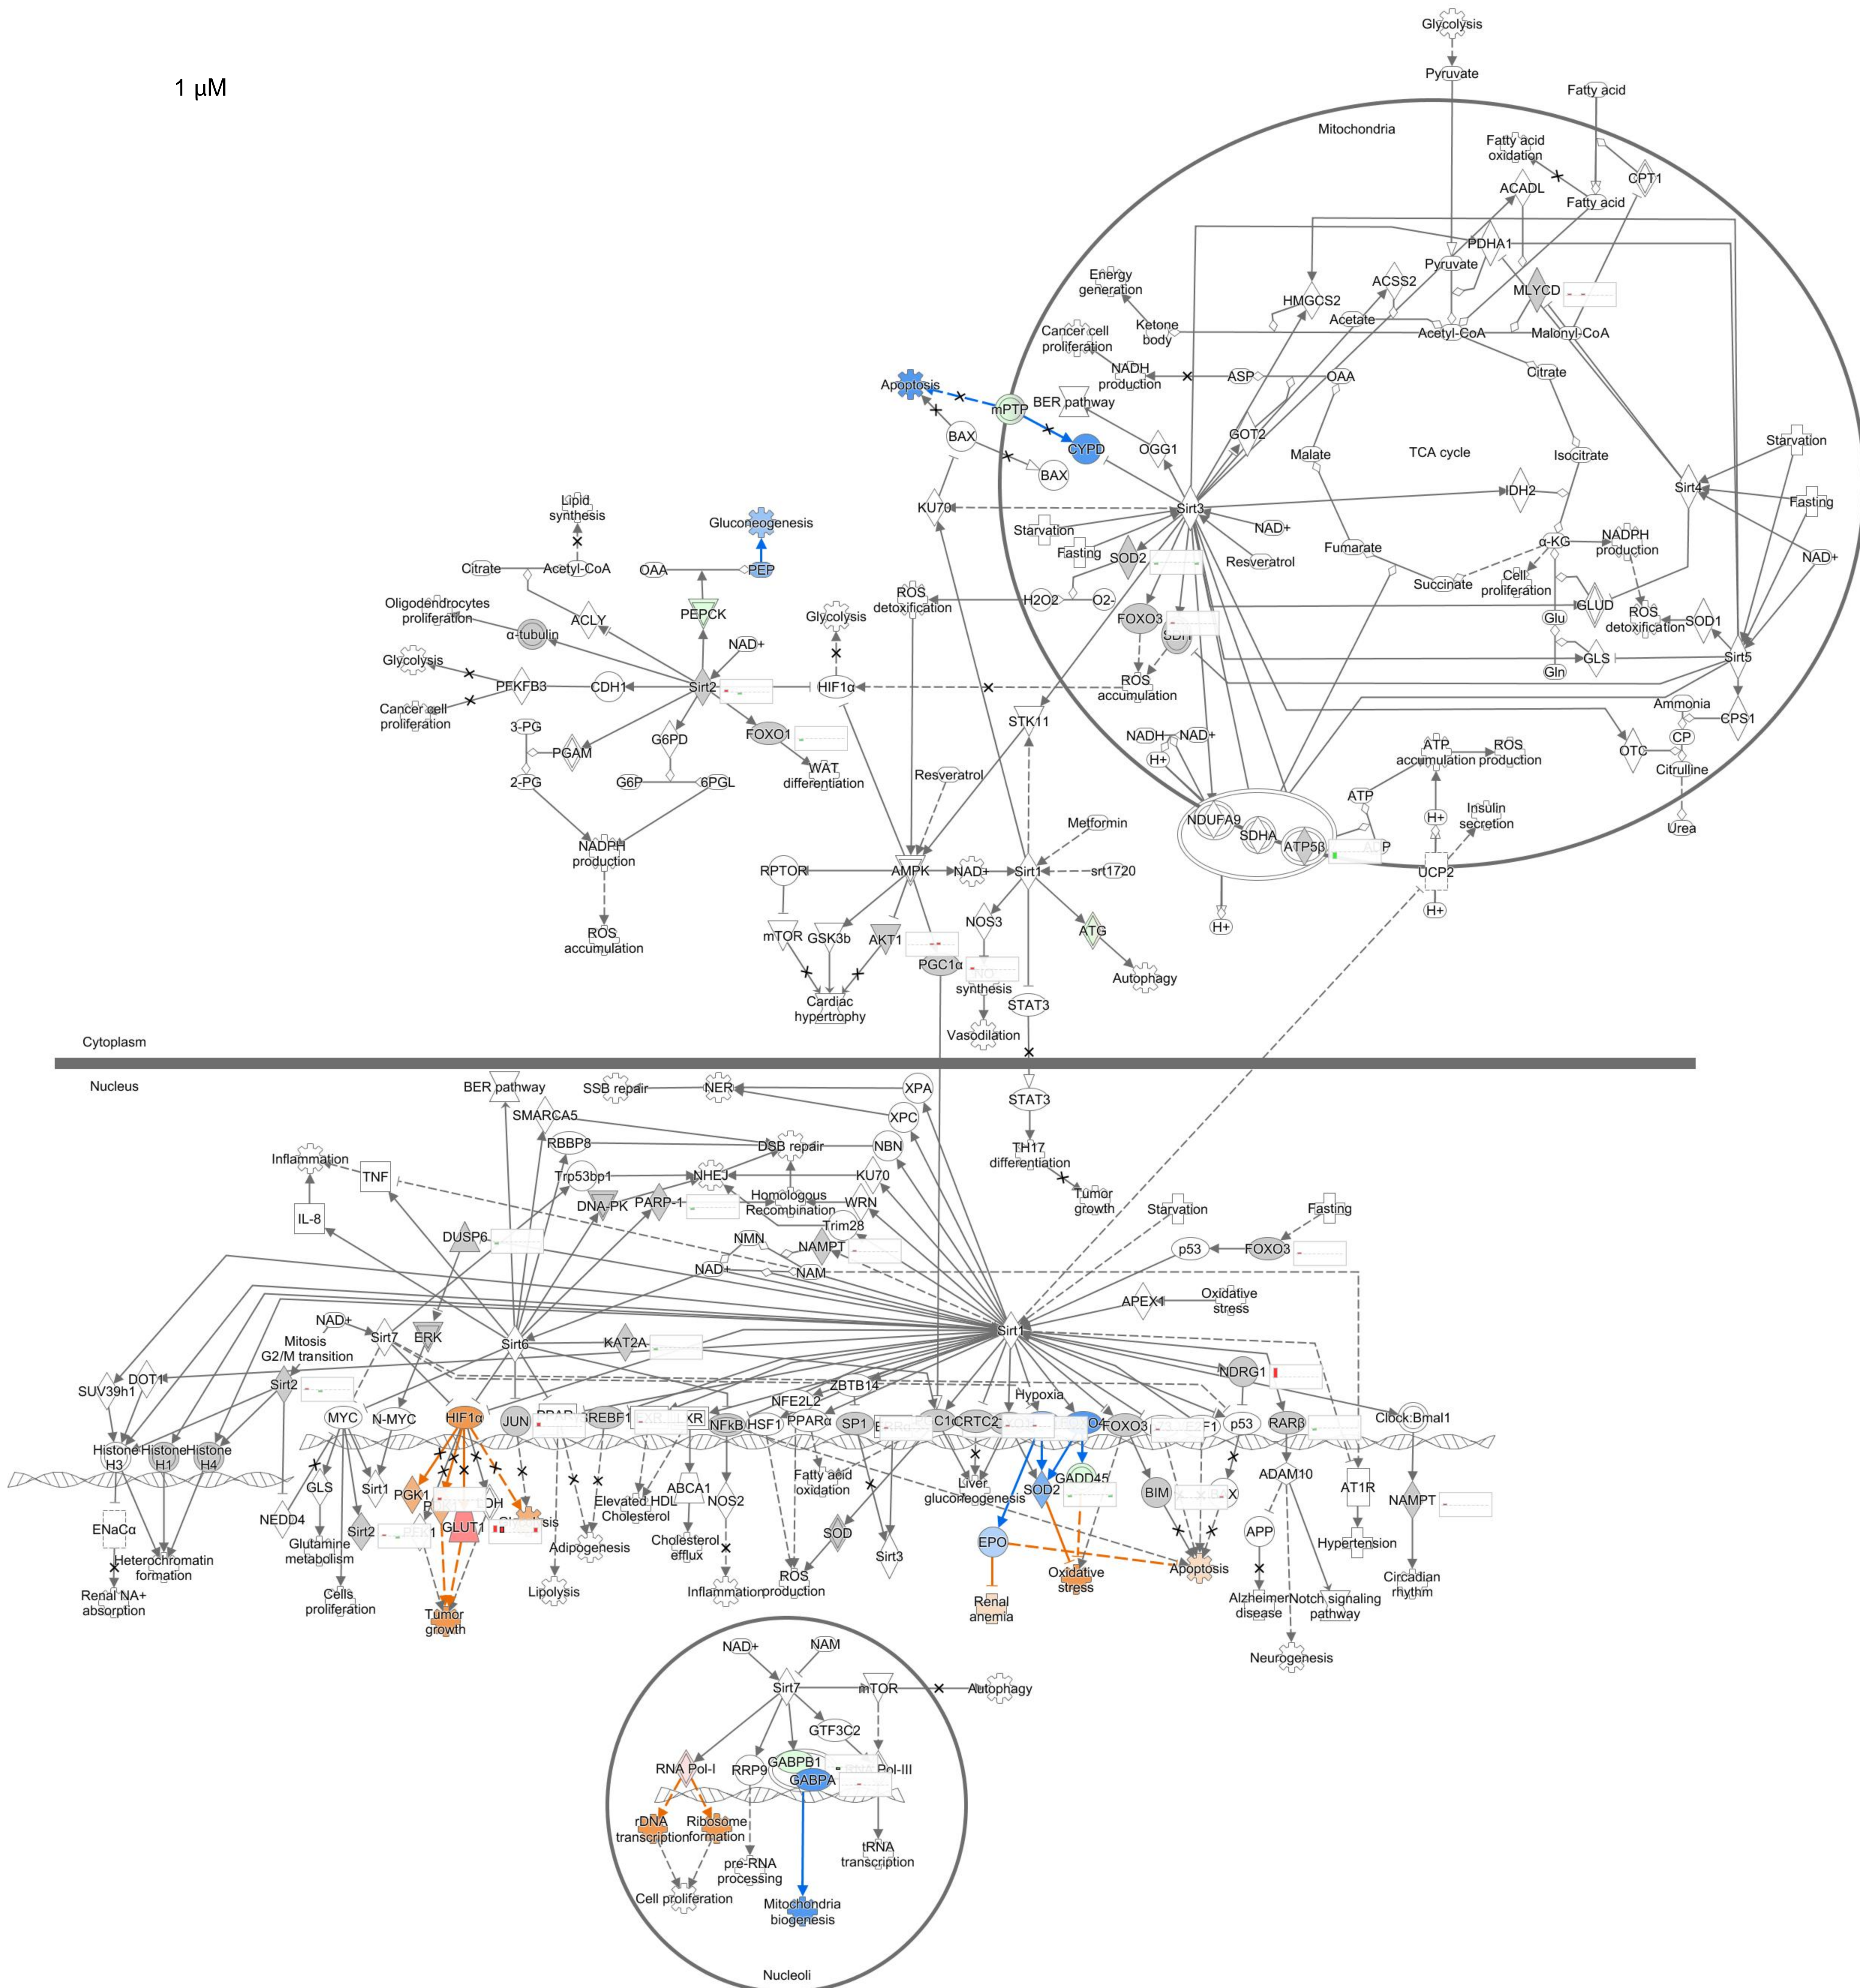



Sirtuins are class III histone deacetylase enzymes that use NAD<sup>+</sup> as a co-substrate for their enzymatic activities. In mammals, there are 7 sirtuin members (SIRT1-7), which play important roles in aging, metabolism, cancer, inflammation, DNA repair and cellular responses to stress.

1 nM

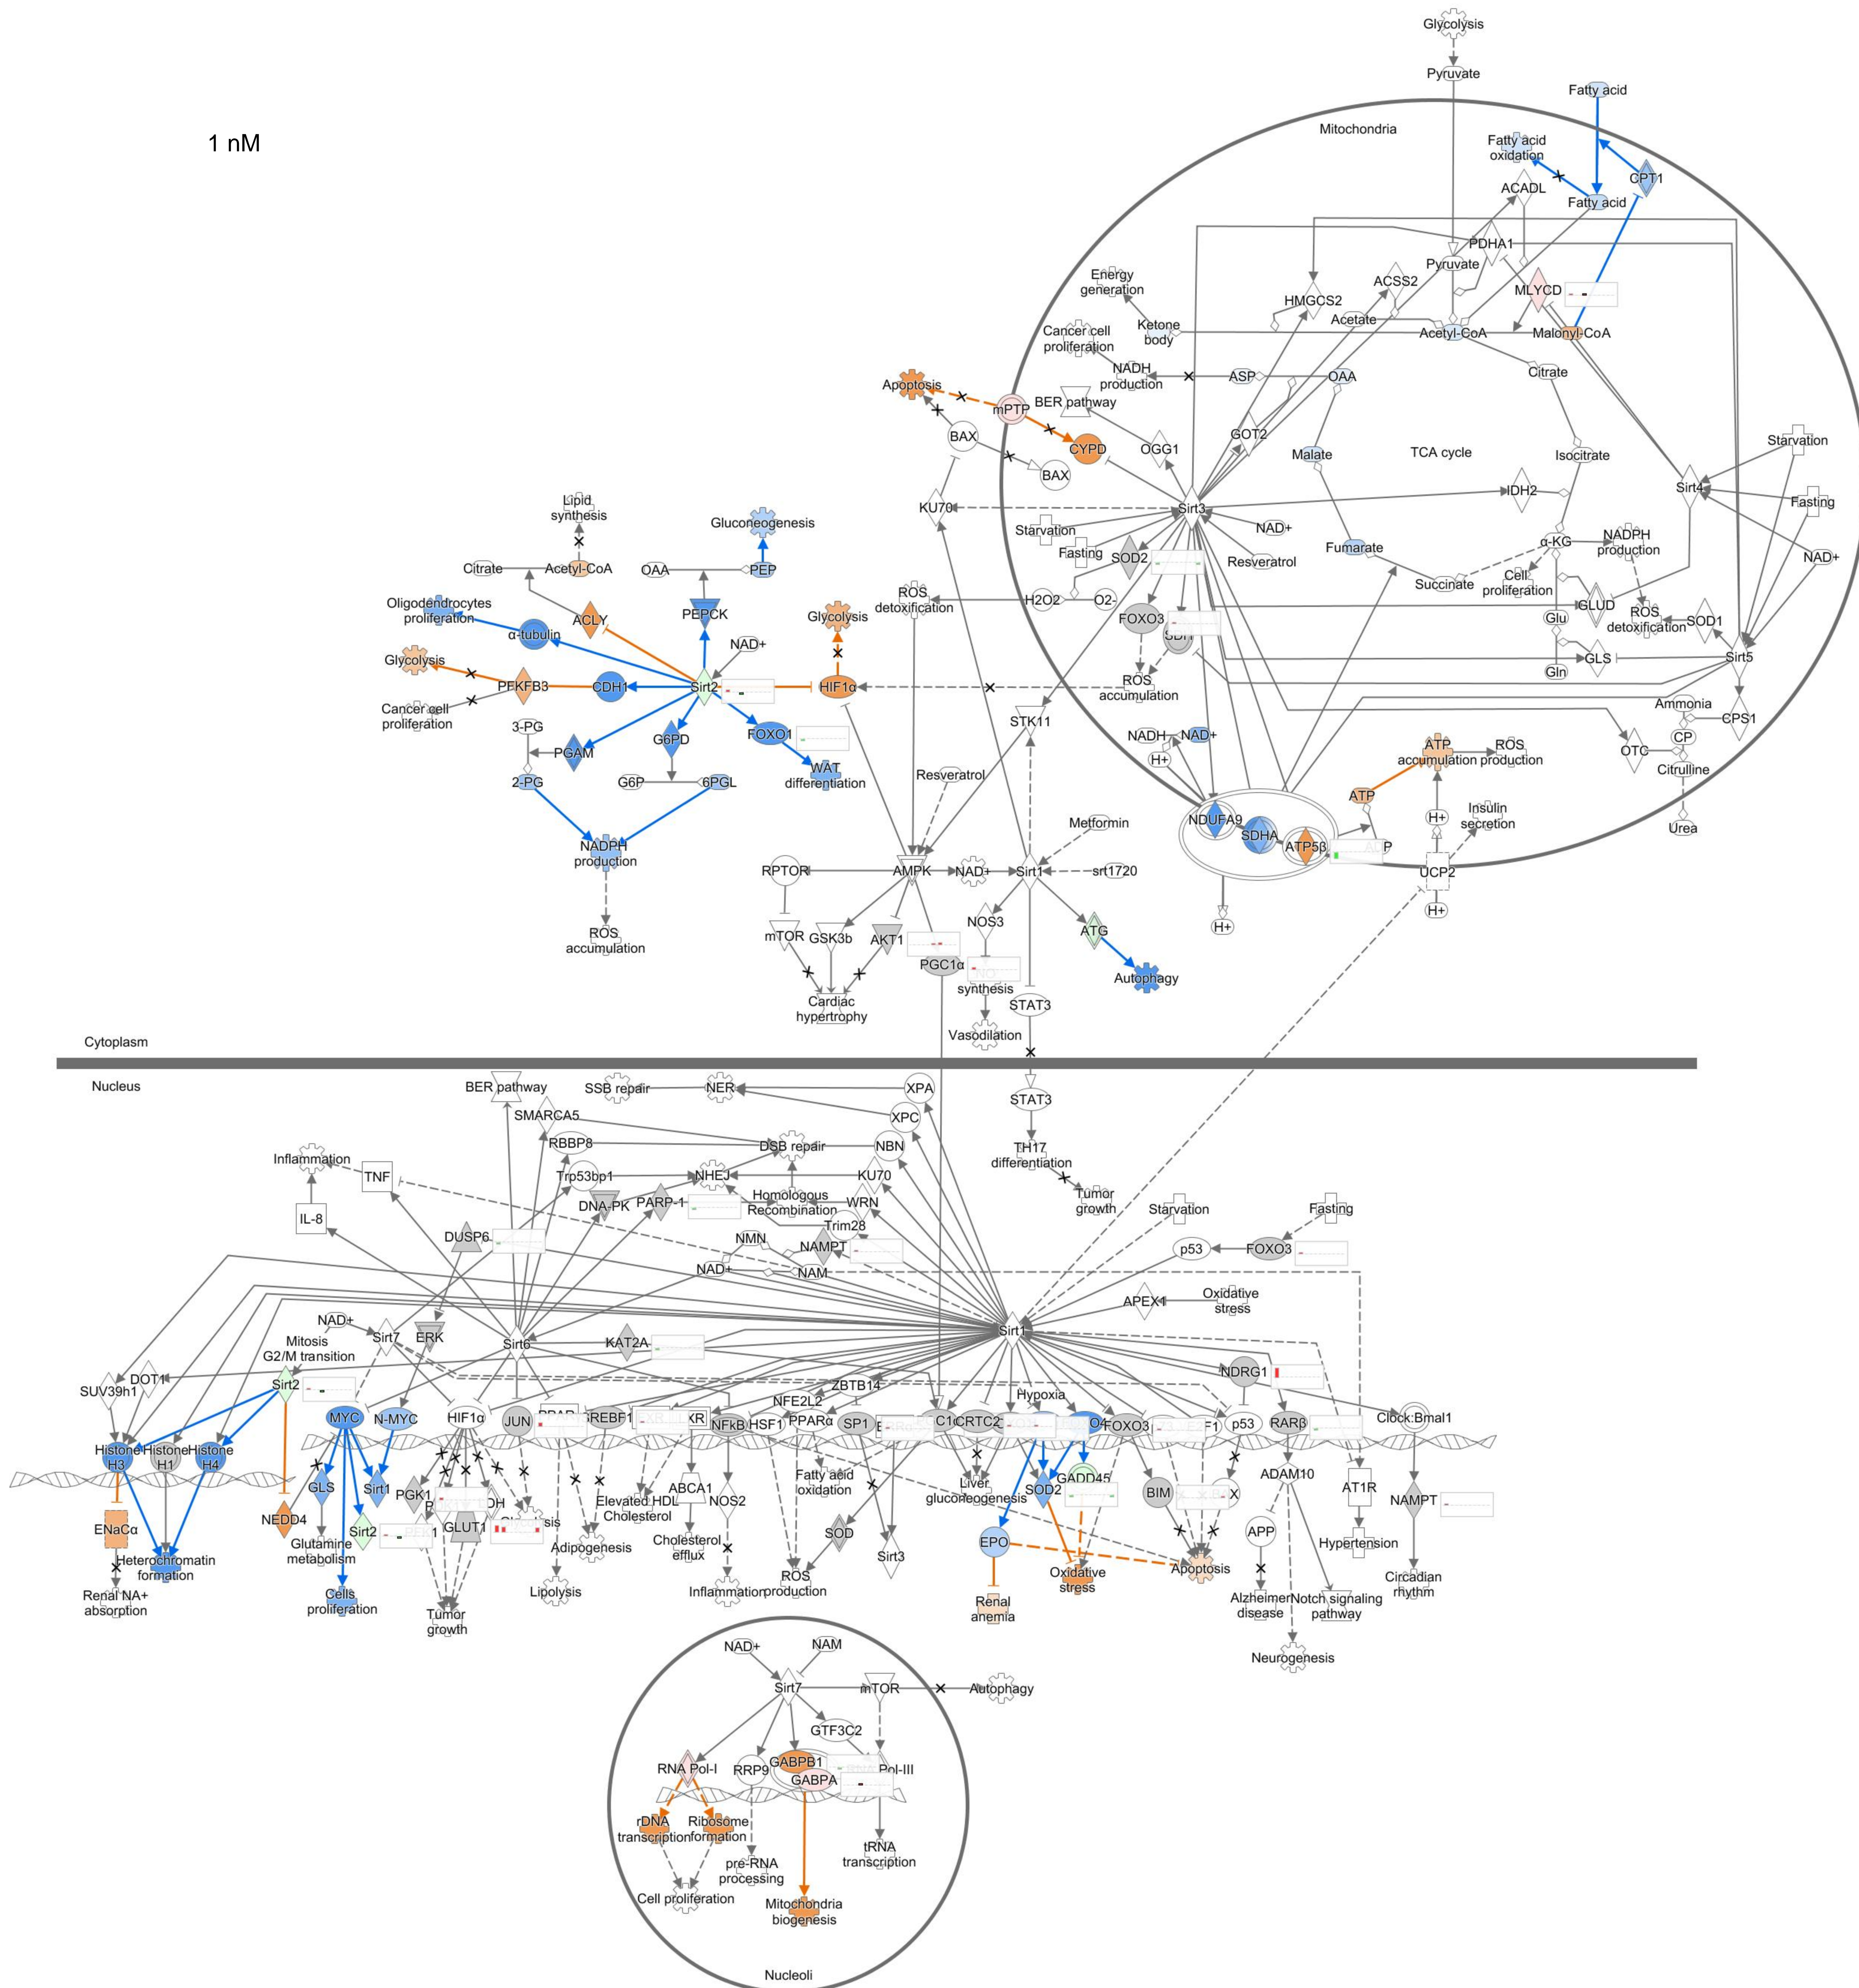



Sirtuins are class III histone deacetylase enzymes that use NAD<sup>+</sup> as a co-substrate for their enzymatic activities. In mammals, there are 7 sirtuin members (SIRT1-7), which play important roles in aging, metabolism, cancer, inflammation, DNA repair and cellular responses to stress.

1 pM

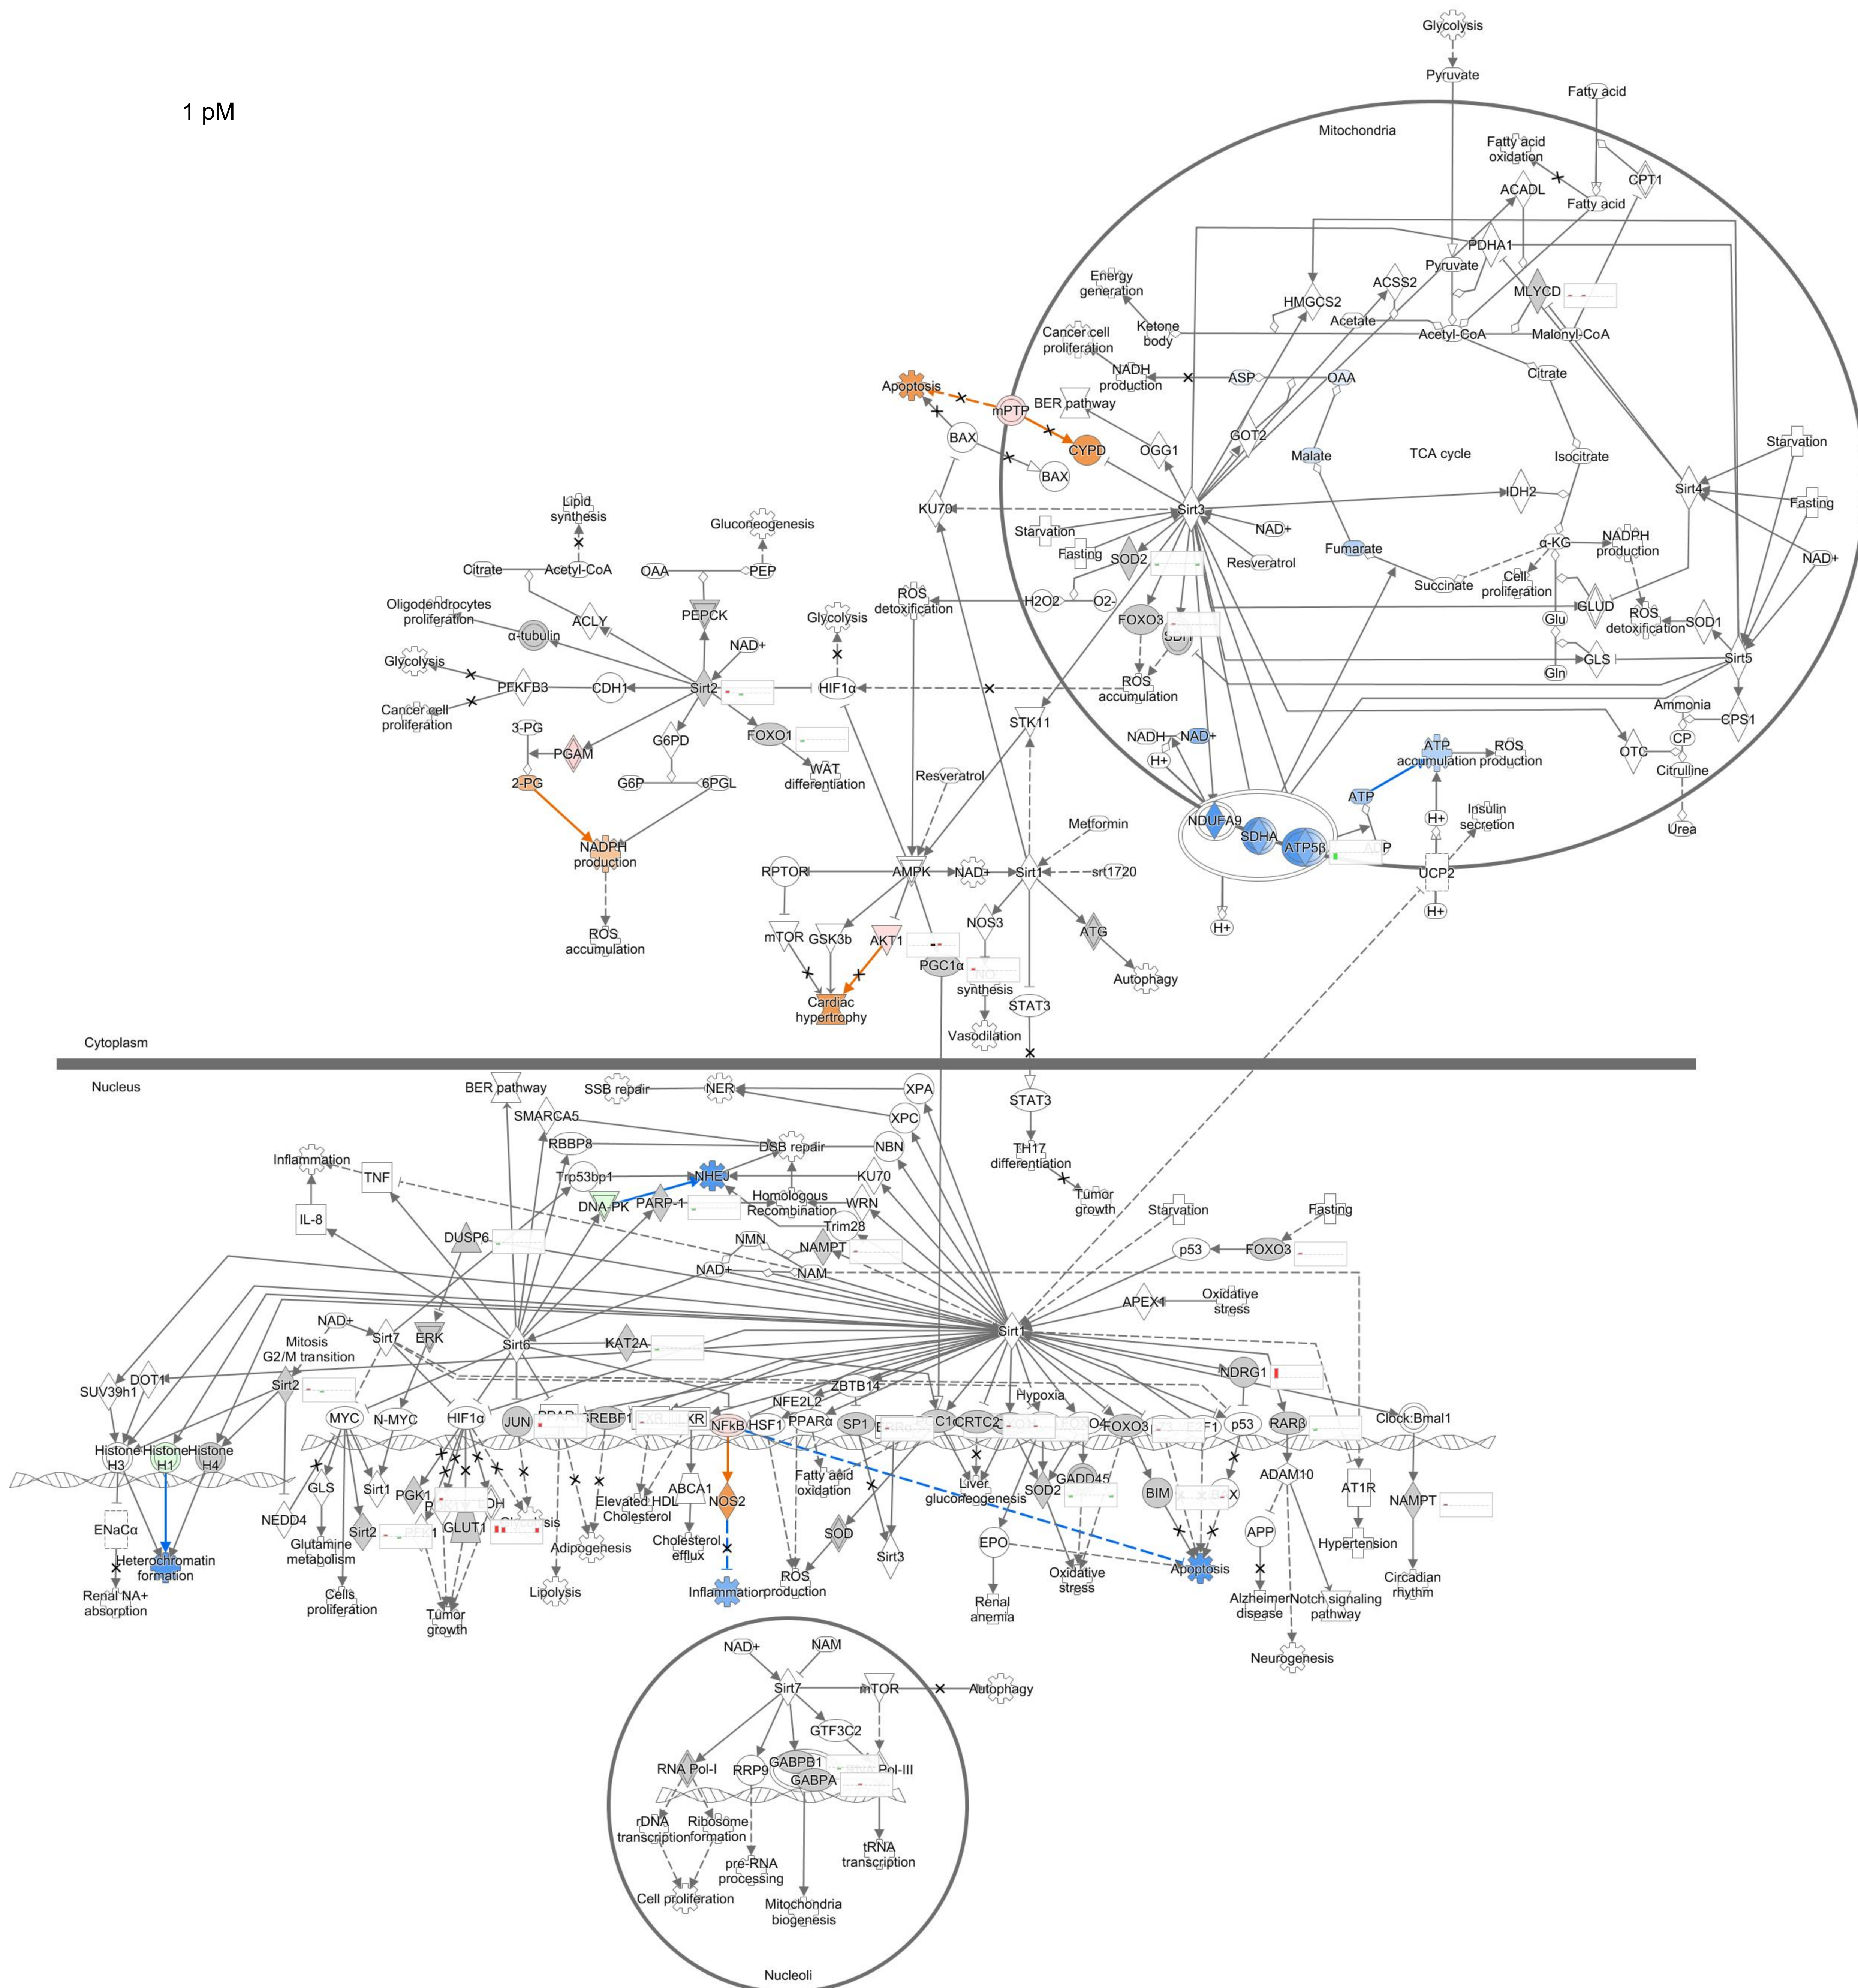



Sirtuins are class III histone deacetylase enzymes that use NAD<sup>+</sup> as a co-substrate for their enzymatic activities. In mammals, there are 7 sirtuin members (SIRT1-7), which play important roles in aging, metabolism, cancer, inflammation, DNA repair and cellular responses to stress.

1 fM

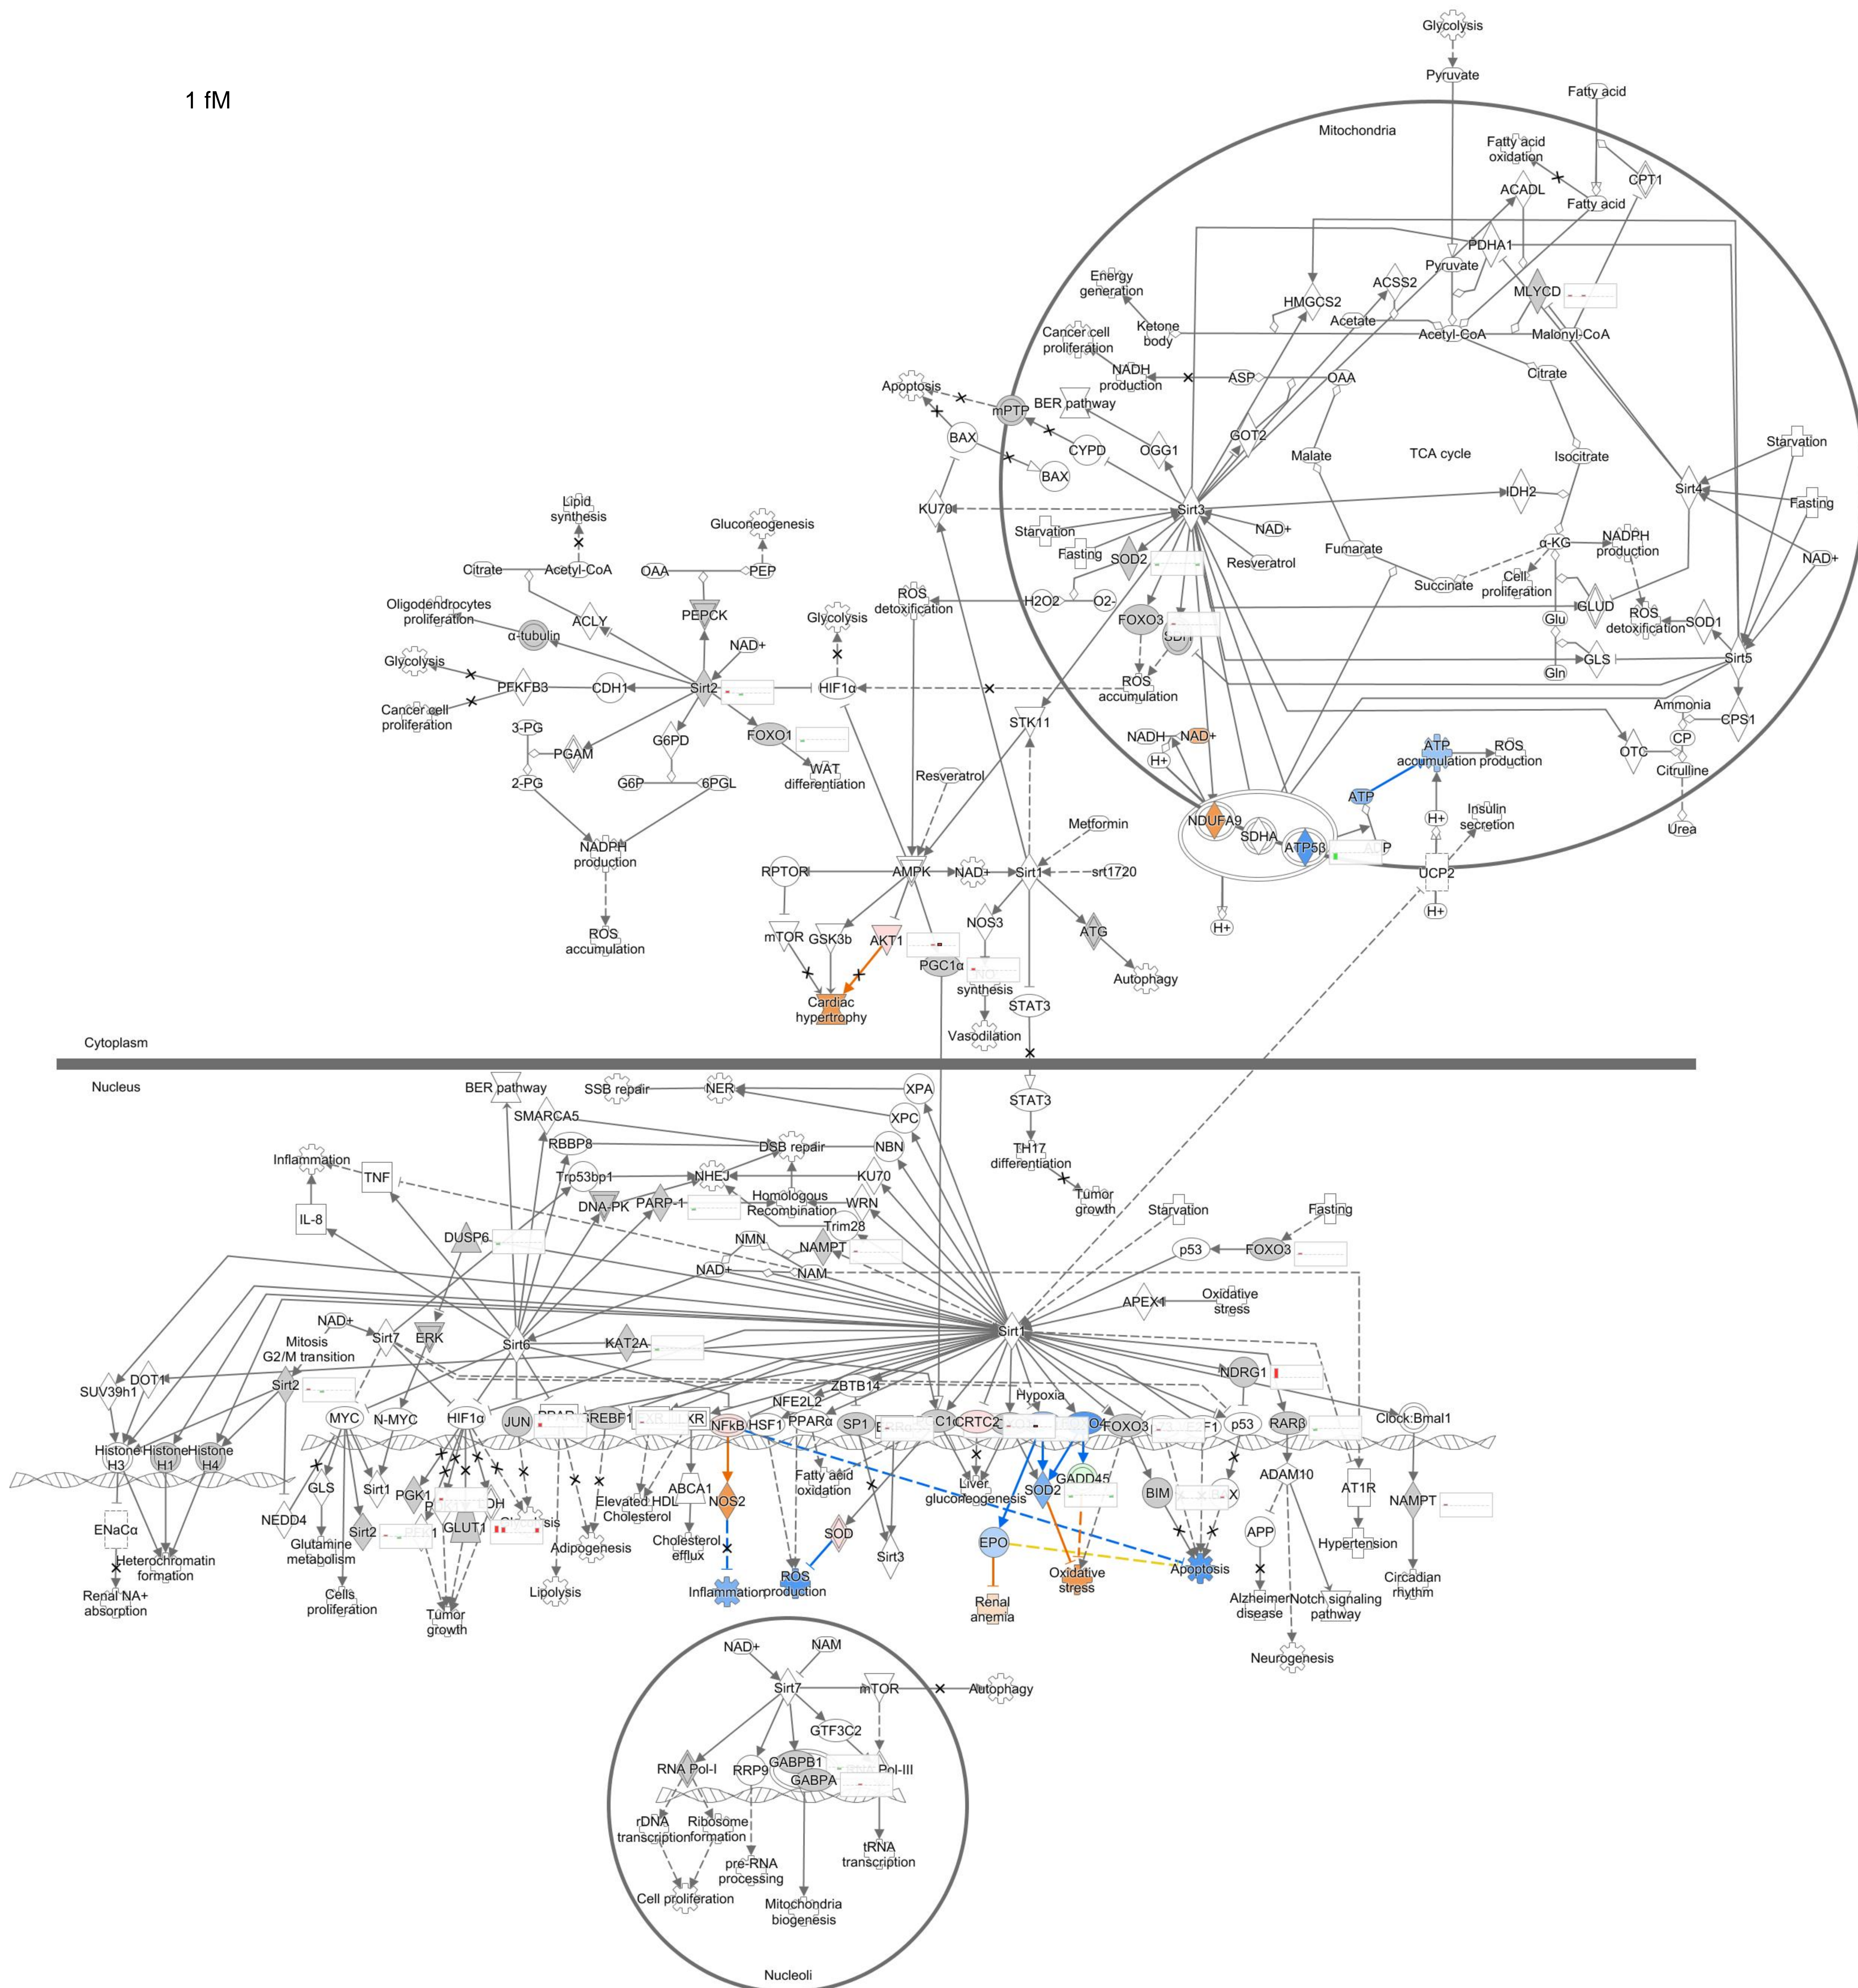



Sirtuins are class III histone deacetylase enzymes that use NAD<sup>+</sup> as a co-substrate for their enzymatic activities. In mammals, there are 7 sirtuin members (SIRT1-7), which play important roles in aging, metabolism, cancer, inflammation, DNA repair and cellular responses to stress.

10 aM

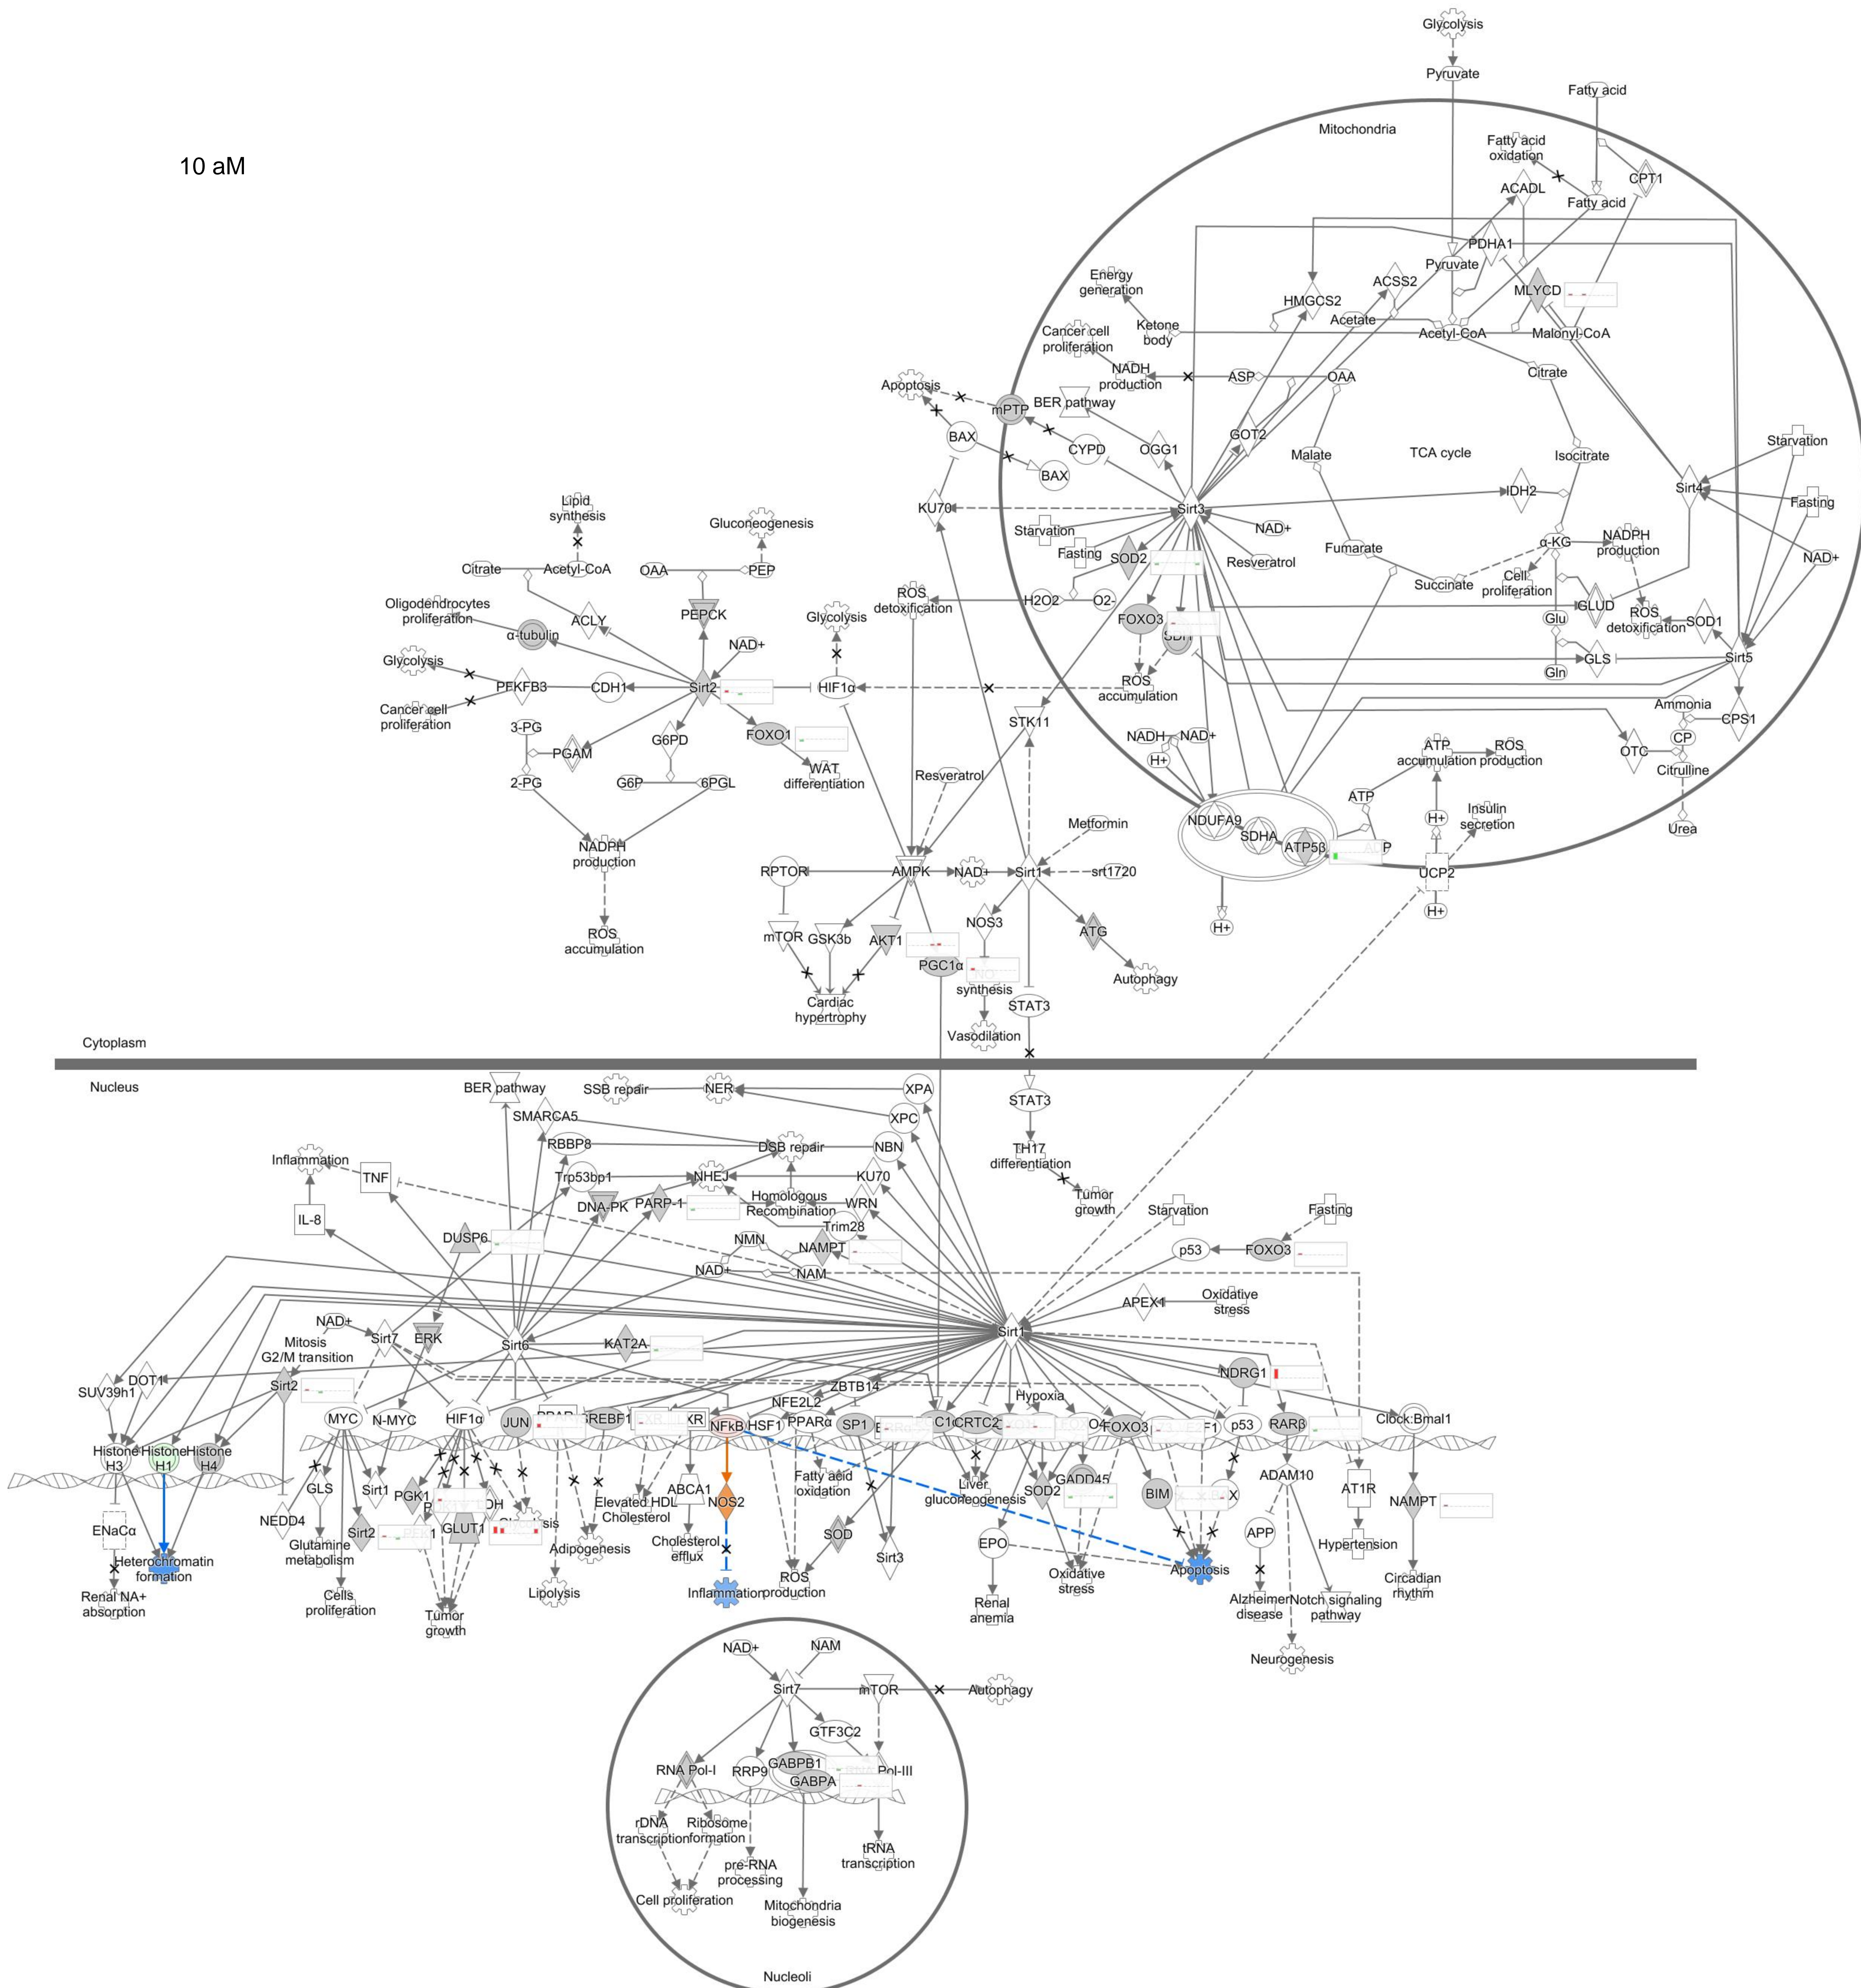



Sirtuins are class III histone deacetylase enzymes that use NAD<sup>+</sup> as a co-substrate for their enzymatic activities. In mammals, there are 7 sirtuin members (SIRT1-7), which play important roles in aging, metabolism, cancer, inflammation, DNA repair and cellular responses to stress.

1 aM

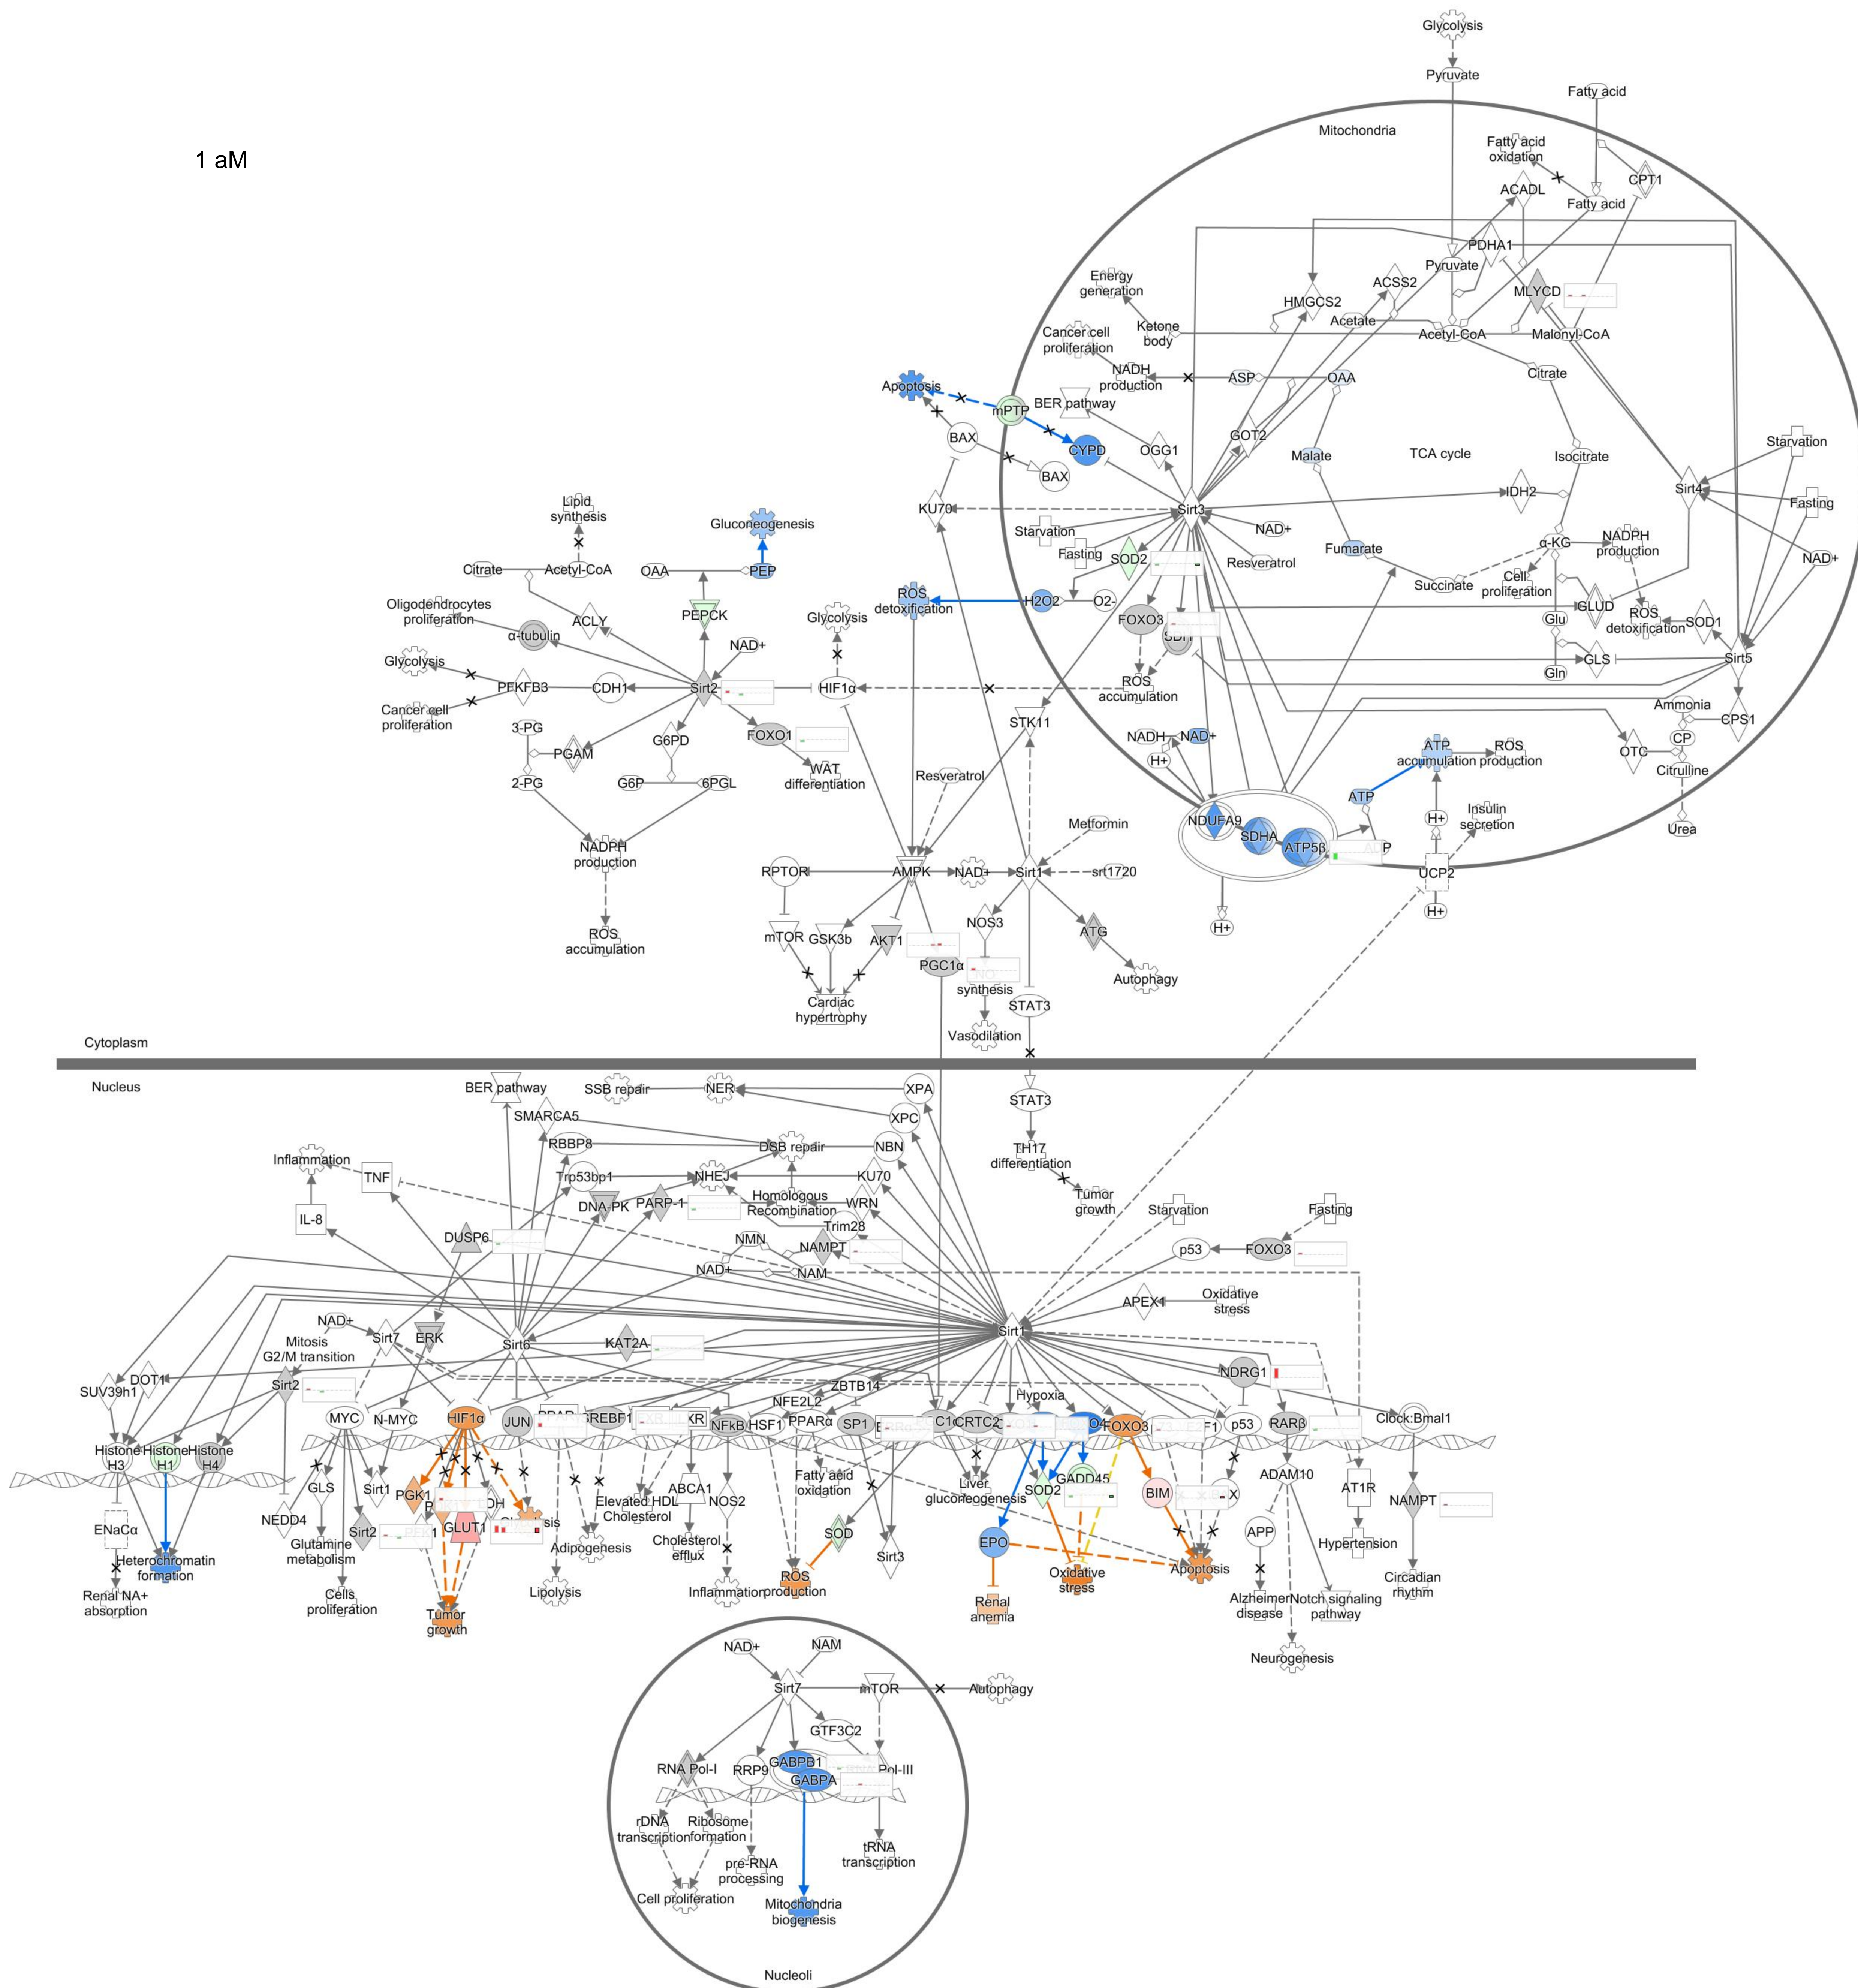

Supplement: Supplementary file 10 [file supplementary]
