# Supplementary material for: Network Pharmacology of Red Ginseng (Part I): Effects of Ginsenoside Rg5 at Physiological and Sub-Physiological Concentrations
Source: Preprints.org preprint supplement (doi:10.20944/preprints202109.0281.v1), 2021-09-16
Supplement: Supplementary file 1 [file Supplement 2 Data sets.xlsx]

## Sheet: Table S3 All datasets genes
Table S3 All datasets genes differentially regulated at Rg5 concentrations 100 µM to 1 aM
Test sample code		S2	S3	S4	S5	S6	S7	S8
Ginsenoside Rg5 concentration, x = - log 10,		4	6	9	12	15	17	18
Symbol	Entrez Gene Name	Expr Fold Change	Expr Fold Change	Expr Fold Change	Expr Fold Change	Expr Fold Change	Expr Fold Change	Expr Fold Change	Location	Type(s)	Biomarker Application(s)	Drug(s)	Entrez Gene ID for Human	Entrez Gene ID for Mouse	Entrez Gene ID for Rat
0610009B22Rik	RIKEN cDNA 0610009B22 gene		-98.025					-73.024	Nucleus	other				66050	100910318
1500011B03Rik	RIKEN cDNA 1500011B03 gene					-30.494			Other	other				66236
1700001F09Rik (includes others)	predicted gene 5800	-21.345		23.419		39.847	20.062	51.928	Other	other				71826|385138|545047|666186|666207|666253|666376|666420|666485|666561|666647|666660|666675|666678|666723|100041106|100042055|100042342|100504444|100861719|102631639|102631744|102634269|102634304|102634872|102635067|102635261|102635554|102636283|102636509|102636873|102636948|102637812|102638116|102639794|102640847|102640955|108168153|108168156
1700009J07Rik	RIKEN cDNA 1700009J07 gene							24.984	Other	other				75188
1700071K01Rik	RIKEN cDNA 1700071K01 gene				57.942		-182.905		Other	other				237880
2310039H08Rik	RIKEN cDNA 2310039H08 gene	-67.162							Other	other				67101	681367
2610005L07Rik	cadherin 11 pseudogene	146.495							Other	other				381598
2610008E11Rik	RIKEN cDNA 2610008E11 gene	-28.381		-23.647					Other	other				72128	691170
2610318N02Rik	RIKEN cDNA 2610318N02 gene	-29.579							Other	other				70458	287935
2610528A11Rik	RIKEN cDNA 2610528A11 gene							46.135	Extracellular Space	cytokine				70045	290595
2700097O09Rik	RIKEN cDNA 2700097O09 gene		20.272				19.33		Extracellular Space	other				72658	314128
4930438A08Rik	RIKEN cDNA 4930438A08 gene	114.264							Other	other				73988	287305
4931440P22Rik	RIKEN cDNA 4931440P22 gene					69.886			Other	other				71004
4933414I15Rik	RIKEN cDNA 4933414I15 gene	20.254		30.127				32.211	Other	other				74408
5031425E22Rik	RIKEN cDNA 5031425E22 gene				51.826			34.607	Other	other				269630
5430405H02Rik	RIKEN cDNA 5430405H02 gene							111.913	Other	other				74487
5830417I10Rik	gon-4-like pseudogene		101.859	120.708	118.314			99.398	Other	other				100302730
9930111J21Rik2	RIKEN cDNA 9930111J21 gene 2	127.931							Other	other				245240
AAAS	aladin WD repeat nucleoporin	198.277							Nucleus	other			8086	223921	300259
AACS	acetoacetyl-CoA synthetase				78.256				Cytoplasm	enzyme			65985	78894	65984
AASDH	aminoadipate-semialdehyde dehydrogenase		-75.623						Other	enzyme			132949	231326	364136
ABCA2	ATP binding cassette subfamily A member 2				49.324				Plasma Membrane	transporter			20	11305	79248
ABCB6	ATP binding cassette subfamily B member 6 (Langereis blood group)	25.861					-19.419		Cytoplasm	transporter			10058	74104	140669
ABCD1	ATP binding cassette subfamily D member 1							24.113	Plasma Membrane	transporter			215	11666	363516
ABHD2	abhydrolase domain containing 2, acylglycerol lipase		-104.926			144.869			Cytoplasm	enzyme			11057	54608	293050
ABHD10	abhydrolase domain containing 10, depalmitoylase	-45.648	-37.012			-43.422			Cytoplasm	enzyme			55347	213012	303953
ABHD17B	abhydrolase domain containing 17B, depalmitoylase		-176.861		-143.886				Plasma Membrane	peptidase			51104	226016	309399
ABLIM1	actin binding LIM protein 1	-372.411		126.61		178.69			Cytoplasm	other			3983	226251	307989
ABRACL	ABRA C-terminal like	-115.346							Other	other			58527	73112	685045
ABRAXAS1	abraxas 1, BRCA1 A complex subunit	165.229							Nucleus	other			84142	70681	289468
ACADSB	acyl-CoA dehydrogenase short/branched chain	-134.124							Cytoplasm	enzyme			36	66885	25618
ACAT2	acetyl-CoA acetyltransferase 2	1095.01			171.893	176.761	123.705		Cytoplasm	enzyme			39	110460|224530	308100|365096
ACBD4	acyl-CoA binding domain containing 4						-25.001		Other	other			79777	67131	303577
ACER3	alkaline ceramidase 3	160.062	35.919						Cytoplasm	enzyme			55331	66190	499210
ACO2	aconitase 2	-334.814							Cytoplasm	enzyme			50	11429	79250
ACOT2	acyl-CoA thioesterase 2	256.318				-392.57	-311.207	-276.131	Cytoplasm	enzyme			10965	171210	192272
ACOT4	acyl-CoA thioesterase 4				43.151				Cytoplasm	enzyme			122970	171282	681337
ACSBG1	acyl-CoA synthetase bubblegum family member 1	51.172							Cytoplasm	enzyme			23205	94180	171410
ACSF3	acyl-CoA synthetase family member 3					33.662			Cytoplasm	enzyme			197322	257633	498962
ACSL4	acyl-CoA synthetase long chain family member 4	909.641	140.168						Cytoplasm	enzyme			2182	50790	113976
ACSM2A	acyl-CoA synthetase medium chain family member 2A	19.837							Cytoplasm	enzyme			123876	233799	246263
ACTA2	actin alpha 2, smooth muscle	-788.01				-163.635	-303.338		Cytoplasm	other	efficacy		59	11475	81633
ACTB	actin beta	-1324.03				-387.455			Cytoplasm	other			60	11461	81822
ACTR3	actin related protein 3			55.434				-180.293	Plasma Membrane	other	diagnosis		10096	74117	81732
ACTR1A	actin related protein 1A					198.391			Cytoplasm	other			10121	54130	294010
ADAM9	ADAM metallopeptidase domain 9	227.292							Plasma Membrane	peptidase	efficacy,prognosis		8754	11502	290834
ADAM17	ADAM metallopeptidase domain 17	116.133							Plasma Membrane	peptidase	unspecified application		6868	11491	57027
ADAM22	ADAM metallopeptidase domain 22	-390.948							Plasma Membrane	peptidase			53616	11496
ADAMTS2	ADAM metallopeptidase with thrombospondin type 1 motif 2	-251.196			55.197				Extracellular Space	peptidase	diagnosis,efficacy		9509	216725	287899
ADAMTS5	ADAM metallopeptidase with thrombospondin type 1 motif 5	-571.785						166.106	Extracellular Space	peptidase		M6495	11096	23794	304135
ADAMTS9	ADAM metallopeptidase with thrombospondin type 1 motif 9		23.628						Extracellular Space	peptidase	diagnosis,disease progression		56999	101401	312566
ADAMTSL5	ADAMTS like 5	615.89							Extracellular Space	other			339366	66548	314626
ADAT1	adenosine deaminase tRNA specific 1				36.013				Other	enzyme			23536	30947	690810
ADAT2	adenosine deaminase tRNA specific 2							-46.39	Nucleus	enzyme			134637	66757	361453
ADCYAP1	adenylate cyclase activating polypeptide 1	20.686							Extracellular Space	other			116	11516	24166
ADGRL1	adhesion G protein-coupled receptor L1							50.358	Plasma Membrane	G-protein coupled receptor			22859	330814	65096
ADI1	acireductone dioxygenase 1	393.996				-55.816			Nucleus	enzyme			55256	104923	298934
ADIPOR2	adiponectin receptor 2	134.483		-41.265					Plasma Membrane	transmembrane receptor			79602	68465	312670
ADO	2-aminoethanethiol dioxygenase	-59.726	-50.416			-52.995			Cytoplasm	enzyme			84890	211488	309732
ADRA1D	adrenoceptor alpha 1D							-36.403	Plasma Membrane	G-protein coupled receptor		acetaminophen/caffeine/chlorpheniramine/hydrocodone/phenylephrine,acetaminophen/clemastine/pseudoephedrine,acetaminophen/dexbrompheniramine/pseudoephedrine,acrivastine/pseudoephedrine,alfuzosin,alpha-methyl dopa,antazoline/naphazoline,apomorphine,apraclonidine,arbutamine,aripiprazole,articaine/epinephrine,asenapine,azatadine/pseudoephedrine,brexpiprazole,brimonidine,brimonidine/brinzolamide,bromp…	146	11550	29413
ADRM1	adhesion regulating molecule 1				256.338				Plasma Membrane	other	unspecified application		11047	56436	65138
ADSL	adenylosuccinate lyase	-286.536							Cytoplasm	enzyme			158	11564	315150
AEBP1	AE binding protein 1	807.114							Nucleus	peptidase			165	11568	305494
AFAP1	actin filament associated protein 1	68.438	-53.558			-69.76			Cytoplasm	other	disease progression		60312	70292	140935
AFF1	AF4/FMR2 family member 1	253.939							Nucleus	transcription regulator			4299	17355	305152
AFF4	AF4/FMR2 family member 4	906.461							Nucleus	transcription regulator			27125	93736	303132
AGAP1	ArfGAP with GTPase domain, ankyrin repeat and PH domain 1	82.387							Cytoplasm	enzyme			116987	347722	316611
AGFG2	ArfGAP with FG repeats 2	43.326							Other	other			3268	231801
AGO1	argonaute RISC component 1	-131.047							Cytoplasm	translation regulator			26523	236511	313594
AHCY	adenosylhomocysteinase	-476.215							Cytoplasm	enzyme	unspecified application	3-deazaaristeromycin,3-deazaneplanocin,6'-C-methylneplanocin A,9-(2',3'-dihydroxycyclopent-4'-enyl)adenine,cyanovirin-N,neplanocin A	191	269378	29443
AHCYL1	adenosylhomocysteinase like 1	-664.708							Cytoplasm	enzyme	unspecified application		10768	229709	362013
AHNAK2	AHNAK nucleoprotein 2	510.605							Cytoplasm	other			113146	100041194	314478
AHR	aryl hydrocarbon receptor				23.221				Nucleus	ligand-dependent nuclear receptor		BAY2416964,KYN-175	196	11622	25690
AHSA1	activator of HSP90 ATPase activity 1	-208.579							Cytoplasm	other			10598	217737	681996
AI413582	expressed sequence AI413582				39.038				Other	other				106672
AI987944 (includes others)	expressed sequence AI987944	-29.72					-27.403		Other	other				71508|77117|233168|234358|235956|626802|627901|668620|674842|100044193|102642386|105245382
AIG1	androgen induced 1	215.588							Other	enzyme			51390	66253	292486
AIMP2	aminoacyl tRNA synthetase complex interacting multifunctional protein 2					161.694			Plasma Membrane	other			7965	231872	288480
AK1	adenylate kinase 1	-438.057							Cytoplasm	kinase	unspecified application		203	11636	24183
AK2	adenylate kinase 2					253.056			Cytoplasm	kinase			204	11637	24184
AK3	adenylate kinase 3	-140.756							Cytoplasm	kinase			50808	56248	26956
AK4	adenylate kinase 4						86.151		Cytoplasm	kinase			205	11639	29223
AK157302	cDNA sequence AK157302	-83.845							Cytoplasm	other				432732
AKR1A1	aldo-keto reductase family 1 member A1	-237.486							Cytoplasm	enzyme		aldose reductase inhibitor	10327	58810	78959
AKR1B1	aldo-keto reductase family 1 member B	1148.09							Cytoplasm	enzyme		sorbinil	231	11677	24192
Akr1b10	aldo-keto reductase family 1, member B10 (aldose reductase)							79.807	Cytoplasm	enzyme				67861	296972|100910708
AKR1C3	aldo-keto reductase family 1 member C3	276.889							Cytoplasm	enzyme		ASP9521	8644	105349	171516
AKT1	AKT serine/threonine kinase 1				313.328	336.532			Cytoplasm	kinase	diagnosis,efficacy,response to therapy	archexin,ARQ 751,BAY1125976,capivasertib,enzastaurin,GSK690693,ipatasertib,LY2780301,miransertib,MK2206,MPT0E028,perifosine,triciribine,triciribine phosphate,uprosertib	207	11651	24185
AKT2	AKT serine/threonine kinase 2		-129.339						Cytoplasm	kinase		BAY1125976,enzastaurin,GSK690693,triciribine,triciribine phosphate	208	11652	25233
AKTIP	AKT interacting protein	-41.709					48.401		Cytoplasm	other			64400	14339	291906
ALAS1	5'-aminolevulinate synthase 1		-64.526					-69.86	Cytoplasm	enzyme		givosiran	211	11655	65155
ALDH2	aldehyde dehydrogenase 2 family member							-59.546	Cytoplasm	enzyme	unspecified application	ANS-6637,chlorpropamide,disulfiram,disulfiram/gemcitabine	217	11669	29539
ALDH16A1	aldehyde dehydrogenase 16 family member A1	37.402							Cytoplasm	enzyme			126133	69748	361571
ALDH18A1	aldehyde dehydrogenase 18 family member A1	154.371		-250.418	-136.21				Cytoplasm	kinase			5832	56454	361755
ALDH1L2	aldehyde dehydrogenase 1 family member L2	594.135	-334.081		-373.36	-383.683			Cytoplasm	enzyme			160428	216188	299699
Aldh3b2	aldehyde dehydrogenase 3 family, member B2			-31.582		-21.913			Cytoplasm	enzyme				621603
ALDH9A1	aldehyde dehydrogenase 9 family member A1				112.663				Cytoplasm	enzyme			223	56752	64040
ALG8	ALG8 alpha-1,3-glucosyltransferase	-29.248							Cytoplasm	enzyme			79053	381903	293129
ALG11	ALG11 alpha-1,2-mannosyltransferase	33.65							Other	other			440138	207958	361174
ALOX5AP	arachidonate 5-lipoxygenase activating protein					29.546		48.312	Plasma Membrane	other			241	11690	29624
ALS2	alsin Rho guanine nucleotide exchange factor ALS2	114.675							Cytoplasm	other
Alyref	Aly/REF export factor	-269.101							Nucleus	other
AMD1	adenosylmethionine decarboxylase 1							-115.992	Cytoplasm	enzyme
AMFR	autocrine motility factor receptor							227.651	Plasma Membrane	transmembrane receptor
AMH	anti-Mullerian hormone						-22.904		Extracellular Space	growth factor	efficacy
AMMECR1	AMMECR nuclear protein 1	-189.6							Nucleus	other
AMOT	angiomotin				27.976				Plasma Membrane	other
AMOTL2	angiomotin like 2	-564.115				162.627			Plasma Membrane	other
AMPH	amphiphysin	-20.348						-20.575	Plasma Membrane	other
ANAPC2	anaphase promoting complex subunit 2				180.759				Nucleus	other
Anapc15	anaphase promoting complex C subunit 15	-98.716							Nucleus	other
Ang2	angiogenin, ribonuclease A family, member 2	49.76							Other	enzyme
ANGPTL2	angiopoietin like 2	1064.6							Extracellular Space	other
ANK1	ankyrin 1					25.006			Plasma Membrane	other
ANKH	ANKH inorganic pyrophosphate transport regulator	413.322		39.785					Plasma Membrane	transporter
ANKRD26	ankyrin repeat domain 26					-25.796			Nucleus	transcription regulator
ANKRD27	ankyrin repeat domain 27	-84.245	-103.684				-42.262		Cytoplasm	other
ANKRD46	ankyrin repeat domain 46	-138.91							Nucleus	transcription regulator
ANLN	anillin actin binding protein	223.644							Cytoplasm	other
ANO8	anoctamin 8						-38.848		Plasma Membrane	ion channel
Anp32a	acidic (leucine-rich) nuclear phosphoprotein 32 family, member A	-812.273							Nucleus	other
ANTKMT	adenine nucleotide translocase lysine methyltransferase							-53.712	Cytoplasm	enzyme
ANXA4	annexin A4							-174.42	Plasma Membrane	other
ANXA5	annexin A5	623.805							Plasma Membrane	transporter	diagnosis,efficacy
ANXA6	annexin A6				91.318				Plasma Membrane	ion channel
ANXA7	annexin A7	171.834							Plasma Membrane	ion channel
ANXA11	annexin A11	555.018					30.122		Nucleus	other
AP1G1	adaptor related protein complex 1 subunit gamma 1		-206.447		-252.571		64.857		Cytoplasm	other
AP2M1	adaptor related protein complex 2 subunit mu 1	-432.676							Cytoplasm	other
AP3M1	adaptor related protein complex 3 subunit mu 1	-277.301	-176.355						Cytoplasm	transporter
AP5B1	adaptor related protein complex 5 subunit beta 1	21.216							Cytoplasm	other
APBA1	amyloid beta precursor protein binding family A member 1	31.563	-23.157						Cytoplasm	transporter	diagnosis,response to therapy
APBB1IP	amyloid beta precursor protein binding family B member 1 interacting protein	-69.822							Cytoplasm	other
APCDD1	APC down-regulated 1	-626.852					172.031		Plasma Membrane	other
API5	apoptosis inhibitor 5							-39.577	Cytoplasm	other
APLP2	amyloid beta precursor like protein 2	-149.703							Cytoplasm	other
APOBEC1	apolipoprotein B mRNA editing enzyme catalytic subunit 1		-72.384		-55.784				Cytoplasm	enzyme
APOOL	apolipoprotein O like	-44.865				-27.965		33.614	Extracellular Space	other
APPL2	adaptor protein, phosphotyrosine interacting with PH domain and leucine zipper 2	143.191							Cytoplasm	other
AQP3	aquaporin 3 (Gill blood group)	41.646							Plasma Membrane	transporter
ARF1	ADP ribosylation factor 1	-736.91							Cytoplasm	enzyme
ARF5	ADP ribosylation factor 5	-312.083							Cytoplasm	enzyme
ARFGAP3	ADP ribosylation factor GTPase activating protein 3	175.916							Cytoplasm	transporter
ARFRP1	ADP ribosylation factor related protein 1	78.249					182.259	202.594	Cytoplasm	enzyme
ARHGAP5	Rho GTPase activating protein 5	-82.988	-36.048						Cytoplasm	enzyme
ARHGAP17	Rho GTPase activating protein 17	138.59							Cytoplasm	other
ARHGAP18	Rho GTPase activating protein 18		37.655			-27.794			Cytoplasm	other
ARHGAP21	Rho GTPase activating protein 21	70.309				-58.381			Cytoplasm	other
ARHGAP33	Rho GTPase activating protein 33	-39.627	-35.804						Plasma Membrane	transporter
ARHGAP35	Rho GTPase activating protein 35	-111.672							Nucleus	transcription regulator
ARHGAP42	Rho GTPase activating protein 42	-76.463				-45.165			Other	other
Arhgap33os	Rho GTPase activating protein 33, opposite strand		-28.29		-25.199				Other	other
ARHGDIA	Rho GDP dissociation inhibitor alpha			238.392					Cytoplasm	other	unspecified application
ARHGEF2	Rho/Rac guanine nucleotide exchange factor 2		-449.369			-491.179		-430.033	Cytoplasm	other
ARHGEF12	Rho guanine nucleotide exchange factor 12			88.891		65.549		92.06	Cytoplasm	other
ARHGEF25	Rho guanine nucleotide exchange factor 25	-39.741							Cytoplasm	other
ARHGEF33	Rho guanine nucleotide exchange factor 33				24.612	20.644			Other	other
ARIH2	ariadne RBR E3 ubiquitin protein ligase 2	52.679			-30.728				Nucleus	enzyme	unspecified application
ARL10	ADP ribosylation factor like GTPase 10			-76.969					Other	other
ARL11	ADP ribosylation factor like GTPase 11	77.997							Other	other
ARL15	ADP ribosylation factor like GTPase 15						-27.076		Cytoplasm	other
ARL16	ADP ribosylation factor like GTPase 16		-33.192						Cytoplasm	other
ARL5A	ADP ribosylation factor like GTPase 5A						-35.528		Other	enzyme
ARL8A	ADP ribosylation factor like GTPase 8A	607.293							Cytoplasm	enzyme
ARL8B	ADP ribosylation factor like GTPase 8B					-294.111			Plasma Membrane	enzyme
ARMC7	armadillo repeat containing 7				62.872				Cytoplasm	other
ARMC8	armadillo repeat containing 8						-45.643		Nucleus	other
ARMC9	armadillo repeat containing 9							40.249	Cytoplasm	other
ARMCX1	armadillo repeat containing X-linked 1	239.235							Other	other
ARMCX2	armadillo repeat containing X-linked 2	-548.155					94.581		Other	other
ARMH3	armadillo like helical domain containing 3	70.978							Other	other
ARRDC3	arrestin domain containing 3	-253.941		-36.053			-70.395		Plasma Membrane	other
ARRDC4	arrestin domain containing 4	112.84					112.231		Plasma Membrane	other
ARVCF	ARVCF delta catenin family member					22.86			Plasma Membrane	other
ASAH1	N-acylsphingosine amidohydrolase 1	935.777							Cytoplasm	enzyme	unspecified application
ASB16	ankyrin repeat and SOCS box containing 16		37.155		36.571				Cytoplasm	other
ASCC3	activating signal cointegrator 1 complex subunit 3					-65.197			Cytoplasm	enzyme
ASF1B	anti-silencing function 1B histone chaperone	-210.795							Nucleus	other
ASIC1	acid sensing ion channel subunit 1	-132.135							Plasma Membrane	ion channel		amiloride,amiloride/hydrochlorothiazide,diclofenac,diclofenac/misoprostol,diclofenac/omeprazole
ASL	argininosuccinate lyase	155.679							Cytoplasm	enzyme
ASNS	asparagine synthetase (glutamine-hydrolyzing)			-448.929	-242.062			-708.207	Cytoplasm	enzyme
ASNSD1	asparagine synthetase domain containing 1	-363.263			-232.339				Other	enzyme
ASPA	aspartoacylase	47.783							Cytoplasm	enzyme
ASPDH	aspartate dehydrogenase domain containing			23.684					Other	other
ASPH	aspartate beta-hydroxylase	-531.958			147.338			80.696	Cytoplasm	enzyme
ASPM	assembly factor for spindle microtubules	-71.756		42.889					Nucleus	other
ASPRV1	aspartic peptidase retroviral like 1			-25.702				-32.855	Other	peptidase
ASXL2	ASXL transcriptional regulator 2							40.337	Extracellular Space	other
ATAD1	ATPase family AAA domain containing 1						-111.919		Plasma Membrane	enzyme
ATAD3A	ATPase family AAA domain containing 3A						-151.645		Cytoplasm	other
ATF4	activating transcription factor 4	1335.61							Nucleus	transcription regulator	efficacy
ATF5	activating transcription factor 5	-141.547		-101.075					Nucleus	transcription regulator
ATF6	activating transcription factor 6	598.275							Cytoplasm	transcription regulator	efficacy
ATG12	autophagy related 12			-31.874					Cytoplasm	other
ATG16L1	autophagy related 16 like 1	51.173							Cytoplasm	enzyme
ATG4A	autophagy related 4A cysteine peptidase		67.823						Cytoplasm	peptidase
ATG9B	autophagy related 9B	239.206							Cytoplasm	other
ATL3	atlastin GTPase 3	149.427							Cytoplasm	other
ATOH8	atonal bHLH transcription factor 8	-196.917		-69.18					Nucleus	transcription regulator
ATOX1	antioxidant 1 copper chaperone					95.907			Cytoplasm	transporter
ATP23	ATP23 metallopeptidase and ATP synthase assembly factor homolog	-51.492	62.125						Plasma Membrane	kinase
Atp10d	ATPase, class V, type 10D	47.18							Cytoplasm	transporter
ATP2A2	ATPase sarcoplasmic/endoplasmic reticulum Ca2+ transporting 2	334.771							Cytoplasm	transporter
ATP2B1	ATPase plasma membrane Ca2+ transporting 1						-191.471	-213.422	Plasma Membrane	transporter
ATP5F1A	ATP synthase F1 subunit alpha	-591.29		202.055					Cytoplasm	transporter
ATP5F1B	ATP synthase F1 subunit beta	-1250.42							Cytoplasm	transporter
ATP5F1C	ATP synthase F1 subunit gamma	-572.22							Cytoplasm	transporter
ATP5IF1	ATP synthase inhibitory factor subunit 1				320.381				Cytoplasm	other
ATP5MC1	ATP synthase membrane subunit c locus 1	-721.124							Cytoplasm	transporter
ATP5MC2	ATP synthase membrane subunit c locus 2	-165.92							Cytoplasm	transporter
ATP5MC3	ATP synthase membrane subunit c locus 3	-569.459			141.827			-134.195	Cytoplasm	transporter
ATP5PB	ATP synthase peripheral stalk-membrane subunit b					-313.699			Cytoplasm	transporter
ATP6AP2	ATPase H+ transporting accessory protein 2	1371.73							Cytoplasm	transporter
ATP6V0C	ATPase H+ transporting V0 subunit c	586.63			141.929				Cytoplasm	transporter
ATP6V1B2	ATPase H+ transporting V1 subunit B2			-82.824					Cytoplasm	transporter	unspecified application	gallium nitrate
ATP6V1C1	ATPase H+ transporting V1 subunit C1	352.868							Cytoplasm	transporter
ATP6V1E1	ATPase H+ transporting V1 subunit E1	272.792							Cytoplasm	transporter
ATP6V1H	ATPase H+ transporting V1 subunit H	302.872							Cytoplasm	transporter
ATP8A1	ATPase phospholipid transporting 8A1					-43.04		-20.132	Cytoplasm	transporter
ATRX	ATRX chromatin remodeler							101.437	Nucleus	transcription regulator
ATXN7L2	ataxin 7 like 2	-29.411							Other	other
ATXN7L3B	ataxin 7 like 3B						84.809		Cytoplasm	other
AU018091	expressed sequence AU018091						-19.182		Other	other
AURKA	aurora kinase A	-206.202			103.483				Nucleus	kinase	efficacy	alisertib,AMG 900,AT-9283,CYC 116,danusertib,ilorasertib,MK 5108,MLN8054,SNS 314,TAS-119,tozasertib,TTP607
AURKAIP1	aurora kinase A interacting protein 1	-54.238							Nucleus	enzyme
AVL9	AVL9 cell migration associated	231.079							Other	other
B230217C12Rik	RIKEN cDNA B230217C12 gene	-50.095							Other	other
B2M	beta-2-microglobulin	1486.81							Plasma Membrane	transmembrane receptor	disease progression,efficacy,safety,unspecified application	4'-iodo-4'-deoxydoxorubicin
B4GALNT3	beta-1,4-N-acetyl-galactosaminyltransferase 3					21.651			Cytoplasm	enzyme
B4GALT1	beta-1,4-galactosyltransferase 1					-97.093			Cytoplasm	enzyme	diagnosis
B4GALT2	beta-1,4-galactosyltransferase 2			37.131					Cytoplasm	enzyme
B4GALT3	beta-1,4-galactosyltransferase 3			-38.988		-23.584			Cytoplasm	enzyme
B4GALT5	beta-1,4-galactosyltransferase 5	559.535							Cytoplasm	enzyme	unspecified application
B4GALT6	beta-1,4-galactosyltransferase 6						41.325		Cytoplasm	enzyme
BABAM2	BRISC and BRCA1 A complex member 2		-340.179					-342.079	Cytoplasm	other
BACE1	beta-secretase 1							36.268	Cytoplasm	peptidase		atabecestat,elenbecestat,lanabecestat,verubecestat
BACH1	BTB domain and CNC homolog 1	132.412							Nucleus	transcription regulator
BAG1	BAG cochaperone 1	-167.084							Cytoplasm	other
BAG3	BAG cochaperone 3			129.437	111.398		82.807		Cytoplasm	other
BAIAP2	BAR/IMD domain containing adaptor protein 2	-120.661							Plasma Membrane	kinase
BANF1	BAF nuclear assembly factor 1	-472.639							Nucleus	other
BAZ1A	bromodomain adjacent to zinc finger domain 1A		-185.65						Nucleus	other
BAZ1B	bromodomain adjacent to zinc finger domain 1B				-431.09				Nucleus	transcription regulator
BBS1	Bardet-Biedl syndrome 1	-31.88							Extracellular Space	other
BBS2	Bardet-Biedl syndrome 2	-58.739							Cytoplasm	other
BBS5	Bardet-Biedl syndrome 5		-63.178						Cytoplasm	other
BBX	BBX high mobility group box domain containing	-256.152							Nucleus	transcription regulator
BCAP29	B cell receptor associated protein 29	-125.612					-66.076		Cytoplasm	transporter
BCAR1	BCAR1 scaffold protein, Cas family member		81.53		110.032		80.245		Plasma Membrane	enzyme	prognosis
BCCIP	BRCA2 and CDKN1A interacting protein	-136.12						-49.057	Nucleus	other
BCL6	BCL6 transcription repressor					33.862			Nucleus	transcription regulator	diagnosis,efficacy,prognosis,unspecified application
BCL9	BCL9 transcription coactivator					87.242		111.157	Nucleus	other
BCL2A1	BCL2 related protein A1						-24.522		Cytoplasm	other
BCL2L1	BCL2 like 1	76.206				58.206			Cytoplasm	other	efficacy,prognosis
BCL2L11	BCL2 like 11							35.483	Cytoplasm	other	efficacy
BCL9L	BCL9 like	-158.641							Cytoplasm	other
BCO1	beta-carotene oxygenase 1					32.883			Cytoplasm	enzyme
BDH2	3-hydroxybutyrate dehydrogenase 2						-26.511		Cytoplasm	enzyme
BEND6	BEN domain containing 6	-34.857							Nucleus	transcription regulator
BEX1	brain expressed X-linked 1			-516.212				-501.226	Other	other
BEX3	brain expressed X-linked 3					104.367			Cytoplasm	other
BGLAP	bone gamma-carboxyglutamate protein	54.968							Extracellular Space	other	diagnosis,efficacy,safety	gallium nitrate
BGN	biglycan	-1949.85							Extracellular Space	other
BHLHE22	basic helix-loop-helix family member e22				22.6				Nucleus	transcription regulator
BHLHE40	basic helix-loop-helix family member e40	244.649							Nucleus	transcription regulator
BICDL1	BICD family like cargo adaptor 1			-24.254					Cytoplasm	other
BICRAL	BRD4 interacting chromatin remodeling complex associated protein like	115.129							Nucleus	other
BIN3	bridging integrator 3					43.353			Cytoplasm	other
BLCAP	BLCAP apoptosis inducing factor		32.39						Other	other
BLMH	bleomycin hydrolase		53.119		82.973				Cytoplasm	peptidase
BLOC1S1	biogenesis of lysosomal organelles complex 1 subunit 1	76.788				75.385			Cytoplasm	other
BLOC1S2	biogenesis of lysosomal organelles complex 1 subunit 2		-116.127						Cytoplasm	other
BLOC1S6	biogenesis of lysosomal organelles complex 1 subunit 6		24.526						Cytoplasm	other
BLVRA	biliverdin reductase A							-28.308	Cytoplasm	enzyme
Bmp8b	bone morphogenetic protein 8b		21.33						Extracellular Space	cytokine
BMT2	base methyltransferase of 25S rRNA 2 homolog	-243.009							Other	other
BNIP3	BCL2 interacting protein 3			113.773					Cytoplasm	other
BNIP5	BCL2 interacting protein 5				21.289				Other	other
BRD2	bromodomain containing 2	203.002		119.936					Nucleus	kinase		BI 894999
BRD7	bromodomain containing 7	-88.889							Nucleus	transcription regulator
BRF1	BRF1 RNA polymerase III transcription initiation factor subunit							-29.139	Nucleus	transcription regulator
BRI3	brain protein I3	408.482							Cytoplasm	other
BRI3BP	BRI3 binding protein	71.159							Extracellular Space	other
BRIP1	BRCA1 interacting protein C-terminal helicase 1							42.499	Nucleus	enzyme
BRIX1	biogenesis of ribosomes BRX1			-55.151					Nucleus	other
BTAF1	B-TFIID TATA-box binding protein associated factor 1	113.558							Nucleus	transcription regulator
BTBD1	BTB domain containing 1						-60.609	-108.285	Cytoplasm	other
BTF3	basic transcription factor 3		-107.26						Nucleus	transcription regulator
BTG1	BTG anti-proliferation factor 1	963.181							Nucleus	transcription regulator
BUB3	BUB3 mitotic checkpoint protein	-347.737							Nucleus	other
BUD13	BUD13 homolog	-33.469						-54.622	Nucleus	other
BYSL	bystin like				95.627			39.779	Nucleus	other
BZW1	basic leucine zipper and W2 domains 1	-397.473			-256.225		-304.1	-287.905	Cytoplasm	translation regulator
BZW2	basic leucine zipper and W2 domains 2	-124.687							Cytoplasm	translation regulator
C10orf88	chromosome 10 open reading frame 88	29.407							Other	enzyme
C11orf1	chromosome 11 open reading frame 1				-59.843			-86.752	Nucleus	other
C11orf98	chromosome 11 open reading frame 98	-371.63							Other	other
C12orf29	chromosome 12 open reading frame 29	94.95			-71.015				Other	other
C14orf119	chromosome 14 open reading frame 119					112.887			Other	other
C15orf40	chromosome 15 open reading frame 40	-51.438							Other	other
C19orf53	chromosome 19 open reading frame 53	-266.38							Nucleus	other
C1orf109	chromosome 1 open reading frame 109						-22.713		Nucleus	other
C1orf115	chromosome 1 open reading frame 115						-33.797		Other	other
C1QBP	complement C1q binding protein							-295.51	Cytoplasm	transcription regulator
C1R	complement C1r	-68.269				-45.575			Extracellular Space	peptidase		SERPING1
C1RL	complement C1r subcomponent like		19.901						Extracellular Space	peptidase
C1S	complement C1s				28.627				Extracellular Space	peptidase		SERPING1,sutimlimab
C2orf49	chromosome 2 open reading frame 49						-45.528		Nucleus	other
C2orf50	chromosome 2 open reading frame 50					23.621		22.557	Other	other
C2orf69	chromosome 2 open reading frame 69				27.631				Other	other
C3orf33	chromosome 3 open reading frame 33	-60.268							Extracellular Space	other
C3orf38	chromosome 3 open reading frame 38						215.608		Nucleus	peptidase
C4orf46	chromosome 4 open reading frame 46							-78.944	Other	other
C5orf34	chromosome 5 open reading frame 34	92.205							Other	other
C5orf46	chromosome 5 open reading frame 46					21.232			Cytoplasm	other
C5orf51	chromosome 5 open reading frame 51	432.681							Other	other
C6orf89	chromosome 6 open reading frame 89	-116.71		-100.844					Cytoplasm	other
C9orf40	chromosome 9 open reading frame 40		38.074						Other	other
C9orf72	C9orf72-SMCR8 complex subunit	240.16							Cytoplasm	other
CA6	carbonic anhydrase 6	731.051	-305.91	-286.066	-274.682	-281.687	-293.039	-313.231	Extracellular Space	enzyme		acetazolamide,benzthiazide,chlorothiazide,chlorthalidone,hydrochlorothiazide,methazolamide,SAR566658,sulfacetamide,topiramate,trichloromethiazide
CA8	carbonic anhydrase 8			-18.961					Cytoplasm	enzyme
CAB39L	calcium binding protein 39 like	-149.46							Cytoplasm	kinase
CACNB3	calcium voltage-gated channel auxiliary subunit beta 3	114.591						63.278	Plasma Membrane	ion channel		dexamethasone/rituximab/verapamil,mibefradil,nimodipine,trandolapril/verapamil,verapamil
CALCOCO1	calcium binding and coiled-coil domain 1	255.102							Nucleus	transcription regulator
Calm1 (includes others)	calmodulin 1	-560.191							Nucleus	other
CALR	calreticulin	-1584.54							Cytoplasm	transcription regulator	efficacy,unspecified application
CALU	calumenin	-370.865							Cytoplasm	other
CAMK2B	calcium/calmodulin dependent protein kinase II beta		22.957						Cytoplasm	kinase
CAMK2G	calcium/calmodulin dependent protein kinase II gamma	-128.942							Cytoplasm	kinase
CAMKK1	calcium/calmodulin dependent protein kinase kinase 1	-52.746							Cytoplasm	kinase
CAMKK2	calcium/calmodulin dependent protein kinase kinase 2							85.964	Cytoplasm	kinase
CAPG	capping actin protein, gelsolin like	971.225							Nucleus	other
CAPN2	calpain 2	171.667			120.537			47.396	Cytoplasm	peptidase		alicapistat,BLD-2660
CAPRIN1	cell cycle associated protein 1	-247.658							Plasma Membrane	other
CAPZA2	capping actin protein of muscle Z-line subunit alpha 2				-288.075			134.454	Cytoplasm	other
CARD9	caspase recruitment domain family member 9			-175.287					Cytoplasm	other	diagnosis
CARHSP1	calcium regulated heat stable protein 1				33.523		25.279		Cytoplasm	transcription regulator
CASC3	CASC3 exon junction complex subunit	191.471							Nucleus	other
CASD1	CAS1 domain containing 1	-264.811							Cytoplasm	enzyme
CASP1	caspase 1						22.008		Cytoplasm	peptidase		caspase 1 inhibitor
CASP6	caspase 6	-169.896							Cytoplasm	peptidase
CAST	calpastatin	496.931							Cytoplasm	peptidase
CATSPER4	cation channel sperm associated 4				21.896		158.229		Cytoplasm	transporter
CAV1	caveolin 1	-1226.72							Plasma Membrane	transmembrane receptor	diagnosis
CAVIN1	caveolae associated protein 1				394.291				Nucleus	transcription regulator
CAVIN3	caveolae associated protein 3			51.175	136.67			86.828	Cytoplasm	other
CBFB	core-binding factor subunit beta	324.851			247.213	173.232		228.221	Nucleus	transcription regulator
Cbr2	carbonyl reductase 2	-112.871				-102.849			Cytoplasm	enzyme
CBX1	chromobox 1							191.002	Nucleus	transcription regulator
CBY3	chibby family member 3					31.689			Other	other
CC2D2A	coiled-coil and C2 domain containing 2A							38.775	Cytoplasm	other
CCDC9	coiled-coil domain containing 9	157.848							Extracellular Space	other
CCDC25	coiled-coil domain containing 25	-24.097							Cytoplasm	other
CCDC34	coiled-coil domain containing 34	-304.418							Other	other
CCDC47	coiled-coil domain containing 47					-145.533		-178.389	Extracellular Space	other
CCDC66	coiled-coil domain containing 66				-142.899				Cytoplasm	other
CCDC80	coiled-coil domain containing 80							111.879	Nucleus	other
CCDC130	coiled-coil domain containing 130	97.219					-37.48		Other	other
CCDC136	coiled-coil domain containing 136						27.929		Cytoplasm	other
CCDC171	coiled-coil domain containing 171	21.173							Other	other
CCDC189	coiled-coil domain containing 189		29.529						Other	other
CCDC102A	coiled-coil domain containing 102A			-33.356					Other	other
CCDC28A	coiled-coil domain containing 28A	67.735							Other	other
Ccdc74a	coiled-coil domain containing 74A	-32.383							Other	other
CCDC90B	coiled-coil domain containing 90B					-24.353			Cytoplasm	other
CCDC9B	coiled-coil domain containing 9B					70.941			Other	other
CCHCR1	coiled-coil alpha-helical rod protein 1							95.488	Cytoplasm	other
CCKAR	cholecystokinin A receptor							25.931	Plasma Membrane	G-protein coupled receptor		dexloxiglumide,lintitript,T-0632
Ccl2	chemokine (C-C motif) ligand 2	-176.718		184.082		221.076		174.539	Extracellular Space	cytokine	unspecified application
CCL4	C-C motif chemokine ligand 4		-30.822						Extracellular Space	cytokine	diagnosis,efficacy,prognosis,unspecified application
Ccl7	chemokine (C-C motif) ligand 7			118.309				109.741	Extracellular Space	cytokine	unspecified application
Ccl9	chemokine (C-C motif) ligand 9	-165.994				100.135			Extracellular Space	cytokine	unspecified application
CCL21	C-C motif chemokine ligand 21					22.235			Extracellular Space	cytokine	disease progression
CCL27	C-C motif chemokine ligand 27	-21.525							Other	other
Ccl27a	chemokine (C-C motif) ligand 27A	-37.193	-44.621	-49.033					Extracellular Space	cytokine
CCM2	CCM2 scaffold protein	-279.798	-238.253	-218.388		-174.128			Cytoplasm	other
CCN2	cellular communication network factor 2	-139.982							Extracellular Space	growth factor		FG-3019
CCN4	cellular communication network factor 4	-139.807							Extracellular Space	other
CCNB2	cyclin B2	-132.59							Cytoplasm	other
CCNC	cyclin C	-144.992	-49.074		-75.829				Nucleus	other
CCND1	cyclin D1	-453.382							Nucleus	transcription regulator	diagnosis,efficacy,prognosis,response to therapy,unspecified application	arsenic trioxide,arsenic trioxide/cytarabine/methotrexate,arsenic trioxide/daunorubicin/tretinoin,arsenic trioxide/gemtuzumab ozogamicin/tretinoin,arsenic trioxide/idarubicin/tretinoin,arsenic trioxide/tretinoin
CCNDBP1	cyclin D1 binding protein 1	78.626							Nucleus	other
CCNE1	cyclin E1	-253.675							Nucleus	transcription regulator
CCNG2	cyclin G2							117.476	Nucleus	other
CCNJ	cyclin J				25.809		52.39		Nucleus	other
CCNK	cyclin K						214.322		Nucleus	kinase
CCNL2	cyclin L2	82.398							Nucleus	other
CCNY	cyclin Y	-102.165							Nucleus	other
CCNYL1	cyclin Y like 1	-138.55							Plasma Membrane	other
CCPG1	cell cycle progression 1	103.019							Other	other
CCT2	chaperonin containing TCP1 subunit 2							-440.555	Cytoplasm	kinase
CCT8	chaperonin containing TCP1 subunit 8	-522.366							Cytoplasm	enzyme
CCT6A	chaperonin containing TCP1 subunit 6A	-349.118							Cytoplasm	other
CD6	CD6 molecule							-24.709	Plasma Membrane	transmembrane receptor
CD9	CD9 molecule	609.019							Plasma Membrane	other	efficacy
CD14	CD14 molecule	134.891							Plasma Membrane	transmembrane receptor	efficacy,unspecified application
CD34	CD34 molecule	1381.3							Plasma Membrane	other	efficacy,prognosis,unspecified application
CD40	CD40 molecule						19.889		Plasma Membrane	transmembrane receptor	efficacy,unspecified application	ABBV-428,ABBV-927,anti-CD40 monoclonal antibody,APX005M,bleselumab,CDX-1140,CFZ533,chi lob 7/4,CP-870893,dacetuzumab,FFP104,lucatumumab,mitazalimab,RO7009789,SEA-CD40
CD44	CD44 molecule (Indian blood group)	1127.36							Plasma Membrane	other	diagnosis,disease progression,prognosis,unspecified application	A6 peptide,AMC303,anti-CD44v7 antibody,RO5429083
CD47	CD47 molecule					-96.459			Plasma Membrane	transmembrane receptor	unspecified application	ALX148,AO-176,CC-90002,HX009,IBI322,magrolimab,TJ011133,TTI-621,TTI-622
CD55	CD55 molecule (Cromer blood group)	61.843							Plasma Membrane	other
CD63	CD63 molecule	1151.36							Plasma Membrane	other
CD68	CD68 molecule	277.692							Plasma Membrane	other	diagnosis,efficacy
CD80	CD80 molecule	-27.374							Plasma Membrane	transmembrane receptor	efficacy,prognosis	abatacept,abatacept/methotrexate,belatacept,galiximab
CD83	CD83 molecule	-30.247	-33.215	-37.124					Plasma Membrane	transmembrane receptor
CD101	CD101 molecule					19.727			Plasma Membrane	other
CD109	CD109 molecule	664.065							Plasma Membrane	other
CD151	CD151 molecule (Raph blood group)	-284.382							Plasma Membrane	other
CD248	CD248 molecule	-525.068							Plasma Membrane	other		ontuxizumab
CD302	CD302 molecule		-48.09						Plasma Membrane	transmembrane receptor
CD300LD	CD300 molecule like family member d				43.668				Plasma Membrane	other
CD3EAP	CD3e molecule associated protein							44.592	Nucleus	other
CDC26	cell division cycle 26	-201.072		78.551					Nucleus	other
CDC123	cell division cycle 123	-268.67							Cytoplasm	other
CDC42EP2	CDC42 effector protein 2	-121.64					42.591		Plasma Membrane	other
CDC42EP4	CDC42 effector protein 4				44.7				Cytoplasm	other
CDC42SE2	CDC42 small effector 2								Plasma Membrane	other
CDCA3	cell division cycle associated 3	-250.214				145.883			Cytoplasm	other
CDK17	cyclin dependent kinase 17	100.577				-95.523			Cytoplasm	kinase
CDK19	cyclin dependent kinase 19	192.837							Nucleus	kinase		alvocidib,SEL120,senexin B
CDKL2	cyclin dependent kinase like 2	20.598							Nucleus	kinase
CDKN2AIP	CDKN2A interacting protein			-42.879			32.19		Nucleus	transcription regulator
CDKN2D	cyclin dependent kinase inhibitor 2D	-127.582		-23.27					Cytoplasm	transcription regulator
CDON	cell adhesion associated, oncogene regulated	-293.255		-59.177					Plasma Membrane	other
CDPF1	cysteine rich DPF motif domain containing 1					44.829			Extracellular Space	other
Cdsn	corneodesmosin		-366.032					-377.113	Extracellular Space	other
CDT1	chromatin licensing and DNA replication factor 1				106.722	88.694	140.189		Nucleus	other
CDV3	CDV3 homolog						-180.724		Cytoplasm	other
CEBPB	CCAAT enhancer binding protein beta	67.573							Nucleus	transcription regulator
CEBPG	CCAAT enhancer binding protein gamma	172.292				-39.526		-81.538	Nucleus	transcription regulator
CELF2	CUGBP Elav-like family member 2	-557.258							Nucleus	other	safety
CENPA	centromere protein A	-450.963							Nucleus	other
CENPC	centromere protein C	-49.532							Nucleus	other
CENPI	centromere protein I				-221.804				Nucleus	other
CENPM	centromere protein M	-362.095							Cytoplasm	other
CENPW	centromere protein W	-184.096							Nucleus	other
CEP19	centrosomal protein 19	-26.786							Cytoplasm	other
CEP20	centrosomal protein 20					-25.93			Cytoplasm	other
CEP55	centrosomal protein 55	-68.014							Cytoplasm	other
CEP63	centrosomal protein 63	-110.456							Cytoplasm	other
CEP78	centrosomal protein 78							-33.916	Cytoplasm	other
CEP95	centrosomal protein 95						28.884		Cytoplasm	other
CEP295NL	CEP295 N-terminal like							20.407	Extracellular Space	other
CERS4	ceramide synthase 4	207.209							Cytoplasm	transcription regulator	diagnosis
CERS5	ceramide synthase 5	395.743							Cytoplasm	transcription regulator	diagnosis
CES1	carboxylesterase 1					21.834			Cytoplasm	enzyme
Ces2g	carboxylesterase 2G	-86.099							Other	enzyme
CFAP69	cilia and flagella associated protein 69	-132.494							Cytoplasm	other
CFAP97	cilia and flagella associated protein 97						63.201		Other	other
CFL1	cofilin 1	-287.516		210.445					Nucleus	other
CHAC1	ChaC glutathione specific gamma-glutamylcyclotransferase 1	933.735							Cytoplasm	enzyme
CHAF1B	chromatin assembly factor 1 subunit B	292.803							Nucleus	other	unspecified application
CHCHD1	coiled-coil-helix-coiled-coil-helix domain containing 1			-102.993					Nucleus	other
CHEK2	checkpoint kinase 2	72.593							Nucleus	kinase		XL844
CHERP	calcium homeostasis endoplasmic reticulum protein	-104.997				68.467			Cytoplasm	other
CHID1	chitinase domain containing 1					68.652			Extracellular Space	other
CHML	CHM like Rab escort protein	59.57						-40.232	Cytoplasm	enzyme
CHMP2B	charged multivesicular body protein 2B			63.047	48.975	74.941			Cytoplasm	other
CHP1	calcineurin like EF-hand protein 1					111.282			Cytoplasm	other
CHPF	chondroitin polymerizing factor				105.411				Cytoplasm	enzyme
CHRD	chordin							48.667	Extracellular Space	other
CHRNB1	cholinergic receptor nicotinic beta 1 subunit	176.019							Plasma Membrane	transmembrane receptor		ABT-089,acetylcholine,amobarbital,arecoline,atracurium,cisatracurium,D-tubocurarine,doxacurium,enflurane,isoflurane,mecamylamine,metocurine,mivacurium,nicotine,pancuronium,pipecuronium,rapacuronium,rocuronium,succinylcholine,vecuronium
CHST1	carbohydrate sulfotransferase 1	32.13							Cytoplasm	enzyme
CHST3	carbohydrate sulfotransferase 3				20.991				Cytoplasm	enzyme
CHSY1	chondroitin sulfate synthase 1	-126.007							Cytoplasm	enzyme
Chtop	chromatin target of PRMT1	-341.476							Nucleus	other
CIAO1	cytosolic iron-sulfur assembly component 1				69.61				Nucleus	transcription regulator
CIAO2B	cytosolic iron-sulfur assembly component 2B				162.268				Cytoplasm	other
CIART	circadian associated repressor of transcription	59.107							Nucleus	other
CIBAR1	CBY1 interacting BAR domain containing 1	-310.38							Cytoplasm	other
CIC	capicua transcriptional repressor						91.846		Nucleus	transcription regulator	unspecified application
CIITA	class II major histocompatibility complex transactivator						20.576		Nucleus	transcription regulator
CIPC	CLOCK interacting pacemaker	-147.259		-85.084					Nucleus	other
CISD1	CDGSH iron sulfur domain 1	-510.205	-181.035						Cytoplasm	other
CISD2	CDGSH iron sulfur domain 2		-26.807						Cytoplasm	other
CISD3	CDGSH iron sulfur domain 3	87.075							Cytoplasm	other
CKAP4	cytoskeleton associated protein 4	-115.36							Cytoplasm	other
CKAP5	cytoskeleton associated protein 5	-217.739			-107.791				Nucleus	transcription regulator
CKS1B	CDC28 protein kinase regulatory subunit 1B			-33.141					Other	kinase
CLASP1	cytoplasmic linker associated protein 1			74.131					Cytoplasm	other
CLCN5	chloride voltage-gated channel 5	343.337							Plasma Membrane	ion channel
CLCN7	chloride voltage-gated channel 7					36.887		59.328	Plasma Membrane	ion channel
CLDN11	claudin 11				27.04				Plasma Membrane	other
CLDN15	claudin 15	-25.801							Plasma Membrane	other
CLDN24	claudin 24		34.415						Plasma Membrane	other
CLEC10A	C-type lectin domain containing 10A		-30.827		-25.259		-34.694		Plasma Membrane	other
CLIC1	chloride intracellular channel 1	241.034							Nucleus	ion channel
CLIC6	chloride intracellular channel 6					64.137			Plasma Membrane	ion channel
CLK1	CDC like kinase 1	140.071							Nucleus	kinase
CLN3	CLN3 lysosomal/endosomal transmembrane protein, battenin	77.222				30.694			Cytoplasm	other
CLN5	CLN5 intracellular trafficking protein	215.363							Cytoplasm	other
CLSTN3	calsyntenin 3			32.315					Plasma Membrane	other
CMTM4	CKLF like MARVEL transmembrane domain containing 4	126.596							Extracellular Space	cytokine
CMTM7	CKLF like MARVEL transmembrane domain containing 7				105.298				Extracellular Space	cytokine
CNGA3	cyclic nucleotide gated channel subunit alpha 3	22.847							Plasma Membrane	ion channel	unspecified application
CNIH1	cornichon family AMPA receptor auxiliary protein 1			-63.928					Plasma Membrane	other
CNIH2	cornichon family AMPA receptor auxiliary protein 2	-135.346		-28.437					Extracellular Space	other
CNN2	calponin 2	-578.093				100.1	90.66		Cytoplasm	other
CNOT7	CCR4-NOT transcription complex subunit 7	-382.314	-232.775	-285.761		-319.772			Nucleus	transcription regulator
CNPPD1	cyclin Pas1/PHO80 domain containing 1	311.398							Other	other
CNST	consortin, connexin sorting protein	37.502							Cytoplasm	other
CNTROB	centrobin, centriole duplication and spindle assembly protein	-121.701							Cytoplasm	other
COG3	component of oligomeric golgi complex 3					89.875			Cytoplasm	other
COG7	component of oligomeric golgi complex 7				-30.521				Cytoplasm	transporter
COIL	coilin				-26.742				Nucleus	enzyme
COL13A1	collagen type XIII alpha 1 chain					58.025			Plasma Membrane	other		collagenase clostridium histolyticum
COL1A1	collagen type I alpha 1 chain	-1355.47	504.368		542.006	492.015		392.326	Extracellular Space	other	diagnosis	collagenase clostridium histolyticum
COL28A1	collagen type XXVIII alpha 1 chain			-45.965					Extracellular Space	other
COL3A1	collagen type III alpha 1 chain	-1431.69		550.734				631.827	Extracellular Space	other	diagnosis,efficacy	collagenase clostridium histolyticum
COL5A1	collagen type V alpha 1 chain	-126.392				26.936			Extracellular Space	other		collagenase clostridium histolyticum
COL5A3	collagen type V alpha 3 chain	21.137							Extracellular Space	other		collagenase clostridium histolyticum
COL6A2	collagen type VI alpha 2 chain						78.82		Extracellular Space	other		collagenase clostridium histolyticum
COL6A3	collagen type VI alpha 3 chain		89.868				115.487		Extracellular Space	other		collagenase clostridium histolyticum
COL6A6	collagen type VI alpha 6 chain			-18.871					Extracellular Space	other
COL8A2	collagen type VIII alpha 2 chain					50.749			Extracellular Space	other		collagenase clostridium histolyticum
COMMD2	COMM domain containing 2			-243.687					Other	other
COMMD4	COMM domain containing 4	141.958	21.817						Cytoplasm	other
COMMD7	COMM domain containing 7				58.671				Cytoplasm	other
COMTD1	catechol-O-methyltransferase domain containing 1	351.526							Plasma Membrane	enzyme
COP1	COP1 E3 ubiquitin ligase	-111.572							Cytoplasm	enzyme
COPA	COPI coat complex subunit alpha			132.998				116.908	Cytoplasm	transporter
COPB2	COPI coat complex subunit beta 2	-286.477							Cytoplasm	transporter
COPRS	coordinator of PRMT5 and differentiation stimulator	44.847							Nucleus	other
Cops2	COP9 signalosome subunit 2				-369.562		-343.395		Nucleus	transcription regulator
COPZ1	COPI coat complex subunit zeta 1	-229.77				157.024	108.196		Cytoplasm	transporter
COPZ2	COPI coat complex subunit zeta 2	-466.027							Cytoplasm	transporter
COQ2	coenzyme Q2, polyprenyltransferase	-43.143						-54.462	Cytoplasm	enzyme
COQ3	coenzyme Q3, methyltransferase						-83.856		Cytoplasm	enzyme
COQ6	coenzyme Q6, monooxygenase	-30.888							Cytoplasm	enzyme
CORIN	corin, serine peptidase				21.742				Plasma Membrane	peptidase
CORO1C	coronin 1C	210.134							Cytoplasm	other
COX10	cytochrome c oxidase assembly factor heme A:farnesyltransferase COX10		-147.474						Cytoplasm	enzyme
COX11	cytochrome c oxidase copper chaperone COX11	-51.823						-26.086	Cytoplasm	enzyme
COX16	cytochrome c oxidase assembly factor COX16			-284.539			-289.136		Cytoplasm	other
COX17	cytochrome c oxidase copper chaperone COX17						-62.896		Cytoplasm	enzyme
COX4I1	cytochrome c oxidase subunit 4I1							-137.477	Cytoplasm	enzyme
Cox6c	cytochrome c oxidase subunit 6C	-1052.1							Cytoplasm	enzyme
Cox7c	cytochrome c oxidase subunit 7C	-624.891							Cytoplasm	other
CP	ceruloplasmin	102.353							Extracellular Space	enzyme	efficacy
CPE	carboxypeptidase E	345.98							Cytoplasm	peptidase
CPEB1	cytoplasmic polyadenylation element binding protein 1	119.98							Cytoplasm	translation regulator
CPED1	cadherin like and PC-esterase domain containing 1					-45.319			Cytoplasm	other
CPN1	carboxypeptidase N subunit 1	40.879							Extracellular Space	peptidase
CPNE7	copine 7	60.822						64.445	Cytoplasm	transporter
CPOX	coproporphyrinogen oxidase			-151.96			-178		Cytoplasm	enzyme
CPSF1	cleavage and polyadenylation specific factor 1					125.014			Nucleus	other
CPSF2	cleavage and polyadenylation specific factor 2				-111.649				Nucleus	other
CPSF3	cleavage and polyadenylation specific factor 3	-86.049							Nucleus	enzyme
CPSF4	cleavage and polyadenylation specific factor 4			-24.196			-37.179	-52.194	Nucleus	other
CPSF6	cleavage and polyadenylation specific factor 6	-264.091							Nucleus	other
CPTP	ceramide-1-phosphate transfer protein	-49.591							Cytoplasm	transporter
CR1L	complement C3b/C4b receptor 1 like	575.719							Plasma Membrane	other
CREBRF	CREB3 regulatory factor	37.174							Nucleus	transcription regulator
CRIM1	cysteine rich transmembrane BMP regulator 1	-289.982							Extracellular Space	kinase	unspecified application
CRNKL1	crooked neck pre-mRNA splicing factor 1			46.265					Nucleus	other
CROCC2	ciliary rootlet coiled-coil, rootletin family member 2		22.541			26.938		20.081	Other	other
CRTAM	cytotoxic and regulatory T cell molecule			-23.004	-28.985				Plasma Membrane	other
CRTAP	cartilage associated protein	-416.661							Extracellular Space	other
CRTC2	CREB regulated transcription coactivator 2	159.154				65.799			Nucleus	other
CRYAB	crystallin alpha B	619.071				85.931			Nucleus	other	diagnosis,disease progression,prognosis,unspecified application
CRYBB3	crystallin beta B3			20.595					Other	other
CRYGN	crystallin gamma N						22.441		Other	other
CRYZL1	crystallin zeta like 1	113.181	-63.112						Cytoplasm	enzyme
CSDE1	cold shock domain containing E1	-569.137							Cytoplasm	enzyme
CSF1	colony stimulating factor 1	-1768.87					113.458		Extracellular Space	cytokine	diagnosis,disease progression,efficacy,prognosis,unspecified application	lacnotuzumab,PD-360324
CSNK1A1	casein kinase 1 alpha 1	-337.689	-116.722						Cytoplasm	kinase
CSNK1D	casein kinase 1 delta	192.456		161.017					Cytoplasm	kinase
CSNK2A1	casein kinase 2 alpha 1					95.79			Nucleus	kinase
CSNK2A2	casein kinase 2 alpha 2					42.908			Cytoplasm	kinase
CSPG4	chondroitin sulfate proteoglycan 4	346.047							Plasma Membrane	other	unspecified application
CSTB	cystatin B	1114.55							Cytoplasm	peptidase	diagnosis
CSTF1	cleavage stimulation factor subunit 1	-114.825							Nucleus	other
CTBP1	C-terminal binding protein 1					-233.726			Nucleus	enzyme
CTDNEP1	CTD nuclear envelope phosphatase 1					76.305			Extracellular Space	phosphatase
CTDSP1	CTD small phosphatase 1					188.279			Nucleus	phosphatase
CTH	cystathionine gamma-lyase		-259.212	-189.624	-200.865		-217.97	-212.266	Cytoplasm	enzyme
CTNNBIP1	catenin beta interacting protein 1	-205.492							Cytoplasm	other
CTNS	cystinosin, lysosomal cystine transporter	789.466							Cytoplasm	transporter
CTRC	chymotrypsin C	25.148							Extracellular Space	peptidase
CTSB	cathepsin B	1624.45					137.832		Cytoplasm	peptidase
CTSD	cathepsin D	1196.64							Cytoplasm	peptidase	diagnosis,unspecified application
CTSV	cathepsin V	1581.02							Cytoplasm	peptidase
CTTN	cortactin	303.96			172.497				Plasma Membrane	other	efficacy
CTTNBP2NL	CTTNBP2 N-terminal like	197.202							Cytoplasm	other
CUEDC2	CUE domain containing 2			-51.077					Extracellular Space	other
CUL7	cullin 7	-225.618							Cytoplasm	enzyme
CUL4A	cullin 4A	-119.408							Nucleus	other
CUTA	cutA divalent cation tolerance homolog	385.694							Cytoplasm	other
CWC25	CWC25 spliceosome associated protein homolog		-81.076				-41.927		Nucleus	other
CWC27	CWC27 spliceosome associated cyclophilin					209.99			Nucleus	enzyme
CXCL2	C-X-C motif chemokine ligand 2						23.032		Extracellular Space	cytokine
CXCL6	C-X-C motif chemokine ligand 6	-62.284							Extracellular Space	cytokine	unspecified application
CXCL12	C-X-C motif chemokine ligand 12	-678.874							Extracellular Space	cytokine	diagnosis,efficacy,prognosis,unspecified application	NOX-A12
CXXC1	CXXC finger protein 1					-60.214			Nucleus	transcription regulator
CXXC4	CXXC finger protein 4					26.517			Cytoplasm	other
CYB5A	cytochrome b5 type A	-211.264							Cytoplasm	enzyme
CYFIP1	cytoplasmic FMR1 interacting protein 1							-73.699	Cytoplasm	translation regulator
CYP2C18	cytochrome P450 family 2 subfamily C member 18	-662.3							Cytoplasm	enzyme
Cyp2c54 (includes others)	cytochrome P450, family 2, subfamily c, polypeptide 54	-24.953							Cytoplasm	enzyme
Cyp2d9 (includes others)	cytochrome P450, family 2, subfamily d, polypeptide 9					97.205		55.807	Cytoplasm	other
CYP4F2	cytochrome P450 family 4 subfamily F member 2		38.216						Cytoplasm	enzyme
CYP4F11	cytochrome P450 family 4 subfamily F member 11	110.045							Cytoplasm	enzyme
Cyp4f17	cytochrome P450, family 4, subfamily f, polypeptide 17			35.667					Other	other
CYP51A1	cytochrome P450 family 51 subfamily A member 1	1903.54	224.957						Cytoplasm	enzyme		betamethasone/clotrimazole,bifonazole,clotrimazole,econazole,efinaconazole,fluconazole,itraconazole,ketoconazole,luliconazole,miconazole,oxiconazole,posaconazole,sertaconazole,terconazole,voriconazole
Cypt1 (includes others)	cysteine-rich perinuclear theca 3						-19.986	-19.876	Other	other
CYREN	cell cycle regulator of NHEJ				32.933				Other	other
CYS1	cystin 1					58.149			Cytoplasm	transcription regulator
D030025P21Rik	RIKEN cDNA D030025P21 gene		29.363						Other	other
D2HGDH	D-2-hydroxyglutarate dehydrogenase	-45.666							Cytoplasm	enzyme
D430020J02Rik	RIKEN cDNA D430020J02 gene	-48.107							Other	other
DAAM1	dishevelled associated activator of morphogenesis 1	74.53							Cytoplasm	other
DAG1	dystroglycan 1		121.187						Plasma Membrane	transmembrane receptor
DAGLA	diacylglycerol lipase alpha	147.536							Plasma Membrane	enzyme
DAND5	DAN domain BMP antagonist family member 5						40.096	38.807	Extracellular Space	other
DAP	death associated protein	535.362							Cytoplasm	transcription regulator
DAPK3	death associated protein kinase 3				91.75				Cytoplasm	kinase
DBF4	DBF4 zinc finger				-114.702				Nucleus	kinase
DBI	diazepam binding inhibitor, acyl-CoA binding protein	666.247							Cytoplasm	other
DBNDD1	dysbindin domain containing 1							21.12	Other	other
DBNL	drebrin like						48.144		Cytoplasm	other	diagnosis
DBP	D-box binding PAR bZIP transcription factor	-901.755							Nucleus	transcription regulator
DBT	dihydrolipoamide branched chain transacylase E2	-107.825		-77.035					Cytoplasm	enzyme
DCAF12	DDB1 and CUL4 associated factor 12	108.834							Cytoplasm	other
DCBLD1	discoidin, CUB and LCCL domain containing 1	-121.955							Extracellular Space	other
DCDC2B	doublecortin domain containing 2B						124.112		Other	other
DCTD	dCMP deaminase	-355.175	-158.104						Cytoplasm	enzyme		tetrahydrouridine
DCUN1D5	defective in cullin neddylation 1 domain containing 5	139.604						253.435	Other	other
DDAH1	dimethylarginine dimethylaminohydrolase 1	-263.852							Cytoplasm	enzyme
DDIT3	DNA damage inducible transcript 3	204.288					-62.214		Nucleus	transcription regulator
DDOST	dolichyl-diphosphooligosaccharide--protein glycosyltransferase non-catalytic subunit	-421.862							Cytoplasm	enzyme
DDRGK1	DDRGK domain containing 1				63.045		-60.224		Extracellular Space	other
DDT	D-dopachrome tautomerase	68.929							Cytoplasm	enzyme
DDX5	DEAD-box helicase 5					-258.402			Nucleus	enzyme	unspecified application
DDX6	DEAD-box helicase 6	-392.175						224.449	Nucleus	enzyme
DDX17	DEAD-box helicase 17	410.698							Nucleus	enzyme	unspecified application
DDX23	DEAD-box helicase 23				94.669				Nucleus	enzyme
DDX31	DEAD-box helicase 31					-21.955			Nucleus	enzyme
DDX50	DExD-box helicase 50	-133.664			-56.115				Nucleus	enzyme
DDX3X	DEAD-box helicase 3 X-linked	160.9		192.614					Cytoplasm	enzyme	diagnosis
DEDD2	death effector domain containing 2		-34.668						Nucleus	other
DEF8	differentially expressed in FDCP 8 homolog	-151.755				-66.197			Other	other
Defa3 (includes others)	defensin, alpha, 3					25.942	29.627		Extracellular Space	other
Defb41	defensin beta 41	22.007							Extracellular Space	other
DELE1	DAP3 binding cell death enhancer 1				72.154				Cytoplasm	other
DENND2B	DENN domain containing 2B					29.431			Cytoplasm	enzyme
DENND4A	DENN domain containing 4A	279.293				-88.873			Nucleus	other
DENND4B	DENN domain containing 4B					-64.505			Extracellular Space	other
DENND6A	DENN domain containing 6A					-32.824			Cytoplasm	other
DERL1	derlin 1	237.208							Cytoplasm	other
DHCR7	7-dehydrocholesterol reductase	211.909							Cytoplasm	enzyme	diagnosis
DHCR24	24-dehydrocholesterol reductase	990.902	307.644			-107.582			Cytoplasm	enzyme
DHODH	dihydroorotate dehydrogenase (quinone)	-44.138			41.495	58.015			Cytoplasm	enzyme		ASLAN003,BAY2402234,brequinar,dichloroallyl lawsone,leflunomide,teriflunomide,vidofludimus
DHPS	deoxyhypusine synthase	260.066						-130.204	Cytoplasm	enzyme	efficacy	dapsone
DHRS1	dehydrogenase/reductase 1	62.225							Cytoplasm	enzyme
DHRS9	dehydrogenase/reductase 9	105.175			-60.388				Cytoplasm	enzyme
DHRSX	dehydrogenase/reductase X-linked					27.675			Extracellular Space	enzyme
DHX15	DEAH-box helicase 15	-152.419							Nucleus	enzyme
DHX16	DEAH-box helicase 16	42.732				40.605			Nucleus	enzyme
DHX29	DExH-box helicase 29	-95.501							Cytoplasm	enzyme
DHX30	DExH-box helicase 30	-28.56							Nucleus	enzyme
DHX36	DEAH-box helicase 36	154.103							Cytoplasm	enzyme
DHX57	DExH-box helicase 57						59.324		Extracellular Space	other
DICER1	dicer 1, ribonuclease III				-25.657				Cytoplasm	enzyme
DIPK1A	divergent protein kinase domain 1A					-65.094			Other	other
DIPK2A	divergent protein kinase domain 2A	-835.298		-268.507		-313.653	-253.936	-305.243	Cytoplasm	other
DLAT	dihydrolipoamide S-acetyltransferase						-58.373	-50.802	Cytoplasm	enzyme
DLEC1	DLEC1 cilia and flagella associated protein					49.141			Cytoplasm	other
DLG4	discs large MAGUK scaffold protein 4	-152.971							Plasma Membrane	kinase	unspecified application
DLG5	discs large MAGUK scaffold protein 5							23.916	Plasma Membrane	other
DLGAP1	DLG associated protein 1	25.397	43.618	47.189					Plasma Membrane	other
DLX1	distal-less homeobox 1				46.35			38.963	Nucleus	transcription regulator	unspecified application
DLX2	distal-less homeobox 2	-222.537							Nucleus	transcription regulator
DMAC2	distal membrane arm assembly complex 2	74.02	-29.494						Cytoplasm	other
DMAC2L	distal membrane arm assembly complex 2 like	-22.789							Cytoplasm	transporter
DMTF1	cyclin D binding myb like transcription factor 1	-84.086	44.071						Nucleus	transcription regulator
DNA2	DNA replication helicase/nuclease 2	59.349							Cytoplasm	enzyme
DNAAF5	dynein axonemal assembly factor 5						-166.902		Cytoplasm	other
DNAH2	dynein axonemal heavy chain 2				26.606				Cytoplasm	other
DNAH9	dynein axonemal heavy chain 9					38.499			Cytoplasm	other
DNAJB1	DnaJ heat shock protein family (Hsp40) member B1				120.598				Nucleus	transcription regulator
DNAJB6	DnaJ heat shock protein family (Hsp40) member B6	550.878			80.763				Nucleus	transcription regulator
DNAJC10	DnaJ heat shock protein family (Hsp40) member C10	-127.521							Cytoplasm	enzyme
DNAJC12	DnaJ heat shock protein family (Hsp40) member C12				27.389				Cytoplasm	other
DNAJC19	DnaJ heat shock protein family (Hsp40) member C19	-337.407							Cytoplasm	other
DNAJC25	DnaJ heat shock protein family (Hsp40) member C25	-87.418							Other	other
DNASE1L1	deoxyribonuclease 1 like 1	94.305							Cytoplasm	enzyme
DND1	DND microRNA-mediated repression inhibitor 1	-49.504	-57.856	-50.735					Cytoplasm	other
DNLZ	DNL-type zinc finger	-221.142							Cytoplasm	other
DNM1L	dynamin 1 like				-36.841				Cytoplasm	enzyme
DNMT3A	DNA methyltransferase 3 alpha				-58.473				Nucleus	enzyme	unspecified application
DNPEP	aspartyl aminopeptidase		-85.142					-77.182	Cytoplasm	peptidase
DNTTIP1	deoxynucleotidyltransferase terminal interacting protein 1			46.064				70.918	Nucleus	ligand-dependent nuclear receptor
DOCK6	dedicator of cytokinesis 6	33.453							Cytoplasm	other
DOCK11	dedicator of cytokinesis 11	85.603							Cytoplasm	other
DOLK	dolichol kinase			30.689					Cytoplasm	kinase
DPH2	diphthamide biosynthesis 2					110.71			Cytoplasm	enzyme
DPH3	diphthamide biosynthesis 3	-76.944					-60.37		Cytoplasm	other
DPH6	diphthamine biosynthesis 6						-97.192		Cytoplasm	enzyme
DPM1	dolichyl-phosphate mannosyltransferase subunit 1, catalytic	-64.387							Cytoplasm	enzyme
DPP7	dipeptidyl peptidase 7	576.543							Cytoplasm	peptidase
DPPA2	developmental pluripotency associated 2			-35.442			-68.979		Nucleus	other
DPY19L1	dpy-19 like C-mannosyltransferase 1							-51.877	Other	other
DPY19L3	dpy-19 like C-mannosyltransferase 3							-30.488	Other	other
DRAM2	DNA damage regulated autophagy modulator 2	172.511							Cytoplasm	other
DRD3	dopamine receptor D3		27.055						Plasma Membrane	G-protein coupled receptor	unspecified application	abaperidone,amisulpride,amitriptyline/perphenazine,apomorphine,aripiprazole,asenapine,brexpiprazole,bromocriptine,carbidopa/entacapone/levodopa,carbidopa/levodopa,carbidopa/levodopa/tolcapone,cariprazine,chlorprothixene,cis-thiothixene,clozapine,dexamethasone/olanzapine,dihydroergocryptine,dihydroergotamine,domperidone,dopamine,fluoxetine/olanzapine,fluphenazine,fluphenazine decanoate,fluphenazin…
DROSHA	drosha ribonuclease III	-391.215							Nucleus	enzyme
DSE	dermatan sulfate epimerase	-135.06							Cytoplasm	enzyme
DSN1	DSN1 component of MIS12 kinetochore complex	88.948							Nucleus	other
DTNA	dystrobrevin alpha							-25.398	Plasma Membrane	other	unspecified application
DTNB	dystrobrevin beta						-55.832		Plasma Membrane	other
DTX3	deltex E3 ubiquitin ligase 3	157.413							Cytoplasm	other
DTX3L	deltex E3 ubiquitin ligase 3L						73.502	59.371	Cytoplasm	enzyme
DTYMK	deoxythymidylate kinase		-133.577						Cytoplasm	kinase
DUSP4	dual specificity phosphatase 4	1290.3							Nucleus	phosphatase	diagnosis
DUSP6	dual specificity phosphatase 6	-294.835							Cytoplasm	phosphatase	diagnosis
DUSP7	dual specificity phosphatase 7	-84.745				83.179			Cytoplasm	phosphatase
DUSP10	dual specificity phosphatase 10	655.869							Nucleus	phosphatase
DUSP12	dual specificity phosphatase 12	-48.276							Nucleus	phosphatase
DUSP19	dual specificity phosphatase 19		41.199						Cytoplasm	phosphatase
DUSP22	dual specificity phosphatase 22	-58.943						-52.994	Cytoplasm	phosphatase
DVL1	dishevelled segment polarity protein 1	79.194							Cytoplasm	other
DYM	dymeclin	132.199	96.573				85.467		Cytoplasm	other
Dync1i2	dynein cytoplasmic 1 intermediate chain 2	-88.853							Cytoplasm	other
DYNC1LI1	dynein cytoplasmic 1 light intermediate chain 1						-124.437		Cytoplasm	other
DYNC1LI2	dynein cytoplasmic 1 light intermediate chain 2						-98.448		Cytoplasm	other
DYNLL1	dynein light chain LC8-type 1	-888.227							Cytoplasm	other
DYNLT1	dynein light chain Tctex-type 1	-476.78				85.927			Cytoplasm	other
DYRK2	dual specificity tyrosine phosphorylation regulated kinase 2	-111.363							Cytoplasm	kinase
DYRK4	dual specificity tyrosine phosphorylation regulated kinase 4	35.306							Nucleus	kinase
DYSF	dysferlin	-61.989							Plasma Membrane	other
E130310I04Rik	RIKEN cDNA E130310I04 gene							23.047	Other	other
E2F3	E2F transcription factor 3		53.605		31.879				Nucleus	transcription regulator	unspecified application
E2F5	E2F transcription factor 5	-209.465			-59.871				Nucleus	transcription regulator
EBF3	EBF transcription factor 3	-113.41				-32.564			Nucleus	transcription regulator
ECHS1	enoyl-CoA hydratase, short chain 1	-95.624							Cytoplasm	enzyme
ECI1	enoyl-CoA delta isomerase 1	-108.089							Cytoplasm	enzyme
ECI2	enoyl-CoA delta isomerase 2	-213.431							Cytoplasm	enzyme
ECM1	extracellular matrix protein 1	240.797							Extracellular Space	transporter	diagnosis
EDA2R	ectodysplasin A2 receptor	277.824							Plasma Membrane	transmembrane receptor
EDN1	endothelin 1	-62.59							Extracellular Space	cytokine	diagnosis,efficacy,prognosis,unspecified application
EEF2K	eukaryotic elongation factor 2 kinase						-67.506	-158.453	Cytoplasm	kinase
EEFSEC	eukaryotic elongation factor, selenocysteine-tRNA specific		-147.627						Cytoplasm	translation regulator
EFCAB14	EF-hand calcium binding domain 14			174.246					Other	other
EFEMP1	EGF containing fibulin extracellular matrix protein 1	-3729.17							Extracellular Space	enzyme
EFNA1	ephrin A1	149.948							Plasma Membrane	other
EGFL6	EGF like domain multiple 6			19.985					Extracellular Space	other
EGLN1	egl-9 family hypoxia inducible factor 1	-65.074							Cytoplasm	enzyme	prognosis
EGR1	early growth response 1	-1098.25	-58.65						Nucleus	transcription regulator	diagnosis,efficacy
EGR2	early growth response 2	-165.435		-51.508					Nucleus	transcription regulator
EGR3	early growth response 3							65.062	Nucleus	transcription regulator
Ehbp1l1	EH domain binding protein 1-like 1	155.144							Other	other
EHD2	EH domain containing 2	-1069.3							Nucleus	other
EIF2AK2	eukaryotic translation initiation factor 2 alpha kinase 2	-186.174							Cytoplasm	kinase		mitapivat
EIF2AK3	eukaryotic translation initiation factor 2 alpha kinase 3	129.646					36.87		Cytoplasm	kinase	efficacy
EIF2B3	eukaryotic translation initiation factor 2B subunit gamma	-119.857		-99.87				-138.992	Cytoplasm	other
EIF3C	eukaryotic translation initiation factor 3 subunit C	49.88		-333.724	-310.023	-396.419	-374.179	-505.893	Cytoplasm	translation regulator	unspecified application
EIF3H	eukaryotic translation initiation factor 3 subunit H	893.971							Cytoplasm	enzyme
EIF4A1	eukaryotic translation initiation factor 4A1					328.666	-501.959		Cytoplasm	translation regulator
EIF4B	eukaryotic translation initiation factor 4B	608.11							Cytoplasm	translation regulator	unspecified application
EIF4E2	eukaryotic translation initiation factor 4E family member 2	28.621						-26.161	Cytoplasm	translation regulator
EIF4E	eukaryotic translation initiation factor 4E	-124.411							Cytoplasm	translation regulator	prognosis	ISIS 183750
EIF4EBP1	eukaryotic translation initiation factor 4E binding protein 1	592.535		-131.751					Cytoplasm	translation regulator	efficacy
EIF4EBP3	eukaryotic translation initiation factor 4E binding protein 3	131.805							Cytoplasm	other
EIF4G2	eukaryotic translation initiation factor 4 gamma 2	-487.229							Cytoplasm	translation regulator
EIF5A	eukaryotic translation initiation factor 5A	-1063.9							Cytoplasm	translation regulator		SNS01-T nanoparticles
ELAC2	elaC ribonuclease Z 2	-147.44							Nucleus	enzyme
ELF1	E74 like ETS transcription factor 1	156.184							Nucleus	transcription regulator
ELF2	E74 like ETS transcription factor 2	349.465							Nucleus	transcription regulator
ELK3	ETS transcription factor ELK3					168.004			Nucleus	transcription regulator
ELOVL1	ELOVL fatty acid elongase 1				182.492				Cytoplasm	enzyme
ELOVL6	ELOVL fatty acid elongase 6	1021.73		218.71			145.236		Cytoplasm	enzyme
ELP1	elongator complex protein 1				35.993				Cytoplasm	other
ELP3	elongator acetyltransferase complex subunit 3					36.802			Nucleus	enzyme
ELP4	elongator acetyltransferase complex subunit 4	-141.237							Cytoplasm	other
ELP6	elongator acetyltransferase complex subunit 6					38.908			Other	other
EME2	essential meiotic structure-specific endonuclease subunit 2	60.657							Other	other
EML1	EMAP like 1	-61.24	354.357				233.943		Cytoplasm	other
EMP3	epithelial membrane protein 3	817.631							Plasma Membrane	other	diagnosis
EMSY	EMSY transcriptional repressor, BRCA2 interacting							95.445	Nucleus	other
ENC1	ectodermal-neural cortex 1	-112.889							Nucleus	peptidase
ENO2	enolase 2	65.989							Cytoplasm	enzyme	diagnosis,efficacy,prognosis,unspecified application
ENOX2	ecto-NOX disulfide-thiol exchanger 2	-42.657	-33	-62.526	-33.692			-52.041	Plasma Membrane	enzyme	efficacy
ENTPD6	ectonucleoside triphosphate diphosphohydrolase 6			59.534	127.341				Cytoplasm	enzyme
ENTPD7	ectonucleoside triphosphate diphosphohydrolase 7	-370.445							Cytoplasm	enzyme
EPB41L1	erythrocyte membrane protein band 4.1 like 1	-91.796							Plasma Membrane	other
EPB41L2	erythrocyte membrane protein band 4.1 like 2	-187.523	149.074	121.315		184.21			Plasma Membrane	other
EPHA2	EPH receptor A2	393.045						-57.116	Plasma Membrane	kinase	disease progression	afatinib/dasatinib,blinatumomab/dasatinib,BT5528,cytarabine/dasatinib,cytarabine/dasatinib/dexamethasone/methotrexate,cytarabine/dasatinib/filgrastim/fludarabine phosphate,cytarabine/dasatinib/filgrastim/fludarabine phosphate/idarubicin,dasatinib,dasatinib/6-mercaptopurine/methotrexate,dasatinib/dexamethasone,dasatinib/erlotinib,dasatinib/filgrastim,dasatinib/hydrocortisone,dasatinib/inotuzumab o…
EPHX1	epoxide hydrolase 1		82.79					195.051	Cytoplasm	peptidase	diagnosis
EPRS1	glutamyl-prolyl-tRNA synthetase 1			-246.398		-403.425	-471.867		Cytoplasm	enzyme
EPS8	epidermal growth factor receptor pathway substrate 8	667.495							Plasma Membrane	peptidase
ERBB2	erb-b2 receptor tyrosine kinase 2			-27.842		-35.115			Plasma Membrane	kinase	diagnosis,disease progression,efficacy,prognosis,safety,unspecified application	188Re-NM02,68GaNOTA-anti-HER2 VHH1,89Zr-trastuzumab,99m-Tc-NM-02,99mTc-HPArk2,[68Ga]ABY-025,A166,ADCT-502,afatinib,afatinib/cetuximab,afatinib/dasatinib,afatinib/osimertinib,afatinib/paclitaxel,allitinib,alpelisib/trastuzumab emtansine,anastrozole/lapatinib,anastrozole/lapatinib/trastuzumab,anastrozole/pertuzumab/trastuzumab,anastrozole/trastuzumab,anti-ErbB2 ADC B003,anti-HER2 antibody,AP32788,A…
ERBB3	erb-b2 receptor tyrosine kinase 3	50.6							Plasma Membrane	kinase	efficacy,prognosis,safety	afatinib,afatinib/cetuximab,afatinib/dasatinib,afatinib/osimertinib,afatinib/paclitaxel,AV-203,BDTX-189,CDX-3379,crizotinib/osimertinib,elgemtumab,erlotinib/osimertinib,gefitinib/osimertinib,GSK2849330,istiratumab,ISU104,lumretuzumab,MCLA-128,MEHD7945A,MM-111,osimertinib,patritumab,REGN1400,sapitinib,seribantumab,sym013,U3-1402,zirconium-89-GSK2849330,zirconium-89-labeled RO5479599
ERGIC1	endoplasmic reticulum-golgi intermediate compartment 1	-291.197			87.891				Cytoplasm	other
ERGIC3	ERGIC and golgi 3	82.837					-68.888		Cytoplasm	other
ERI2	ERI1 exoribonuclease family member 2						-103.923		Other	other
ERI3	ERI1 exoribonuclease family member 3	-233.075							Plasma Membrane	other
ERICH5	glutamate rich 5			20.165	21.752			26.78	Other	other
ERMP1	endoplasmic reticulum metallopeptidase 1	-34.045							Cytoplasm	other
ERN1	endoplasmic reticulum to nucleus signaling 1	220.402				144.279			Cytoplasm	kinase
ERO1A	endoplasmic reticulum oxidoreductase 1 alpha	1383.66				-383.803	-292.878		Cytoplasm	enzyme
ERP44	endoplasmic reticulum protein 44		-306.665						Cytoplasm	enzyme
ESF1	ESF1 nucleolar pre-rRNA processing protein homolog							-29.243	Nucleus	other
ESM1	endothelial cell specific molecule 1	21.06							Extracellular Space	growth factor
ESR1	estrogen receptor 1			33.61					Nucleus	ligand-dependent nuclear receptor	diagnosis,disease progression,efficacy,prognosis,response to therapy,unspecified application	17-alpha-ethinylestradiol,4-hydroxytamoxifen,abemaciclib/fulvestrant,acolbifene,alpelisib/fulvestrant,anastrozole/exemestane/fulvestrant,anastrozole/exemestane/fulvestrant/tamoxifen,anastrozole/fulvestrant,anastrozole/fulvestrant/goserelin/tamoxifen,anastrozole/fulvestrant/tamoxifen,anastrozole/goserelin/tamoxifen,anastrozole/tamoxifen,ARV-471,arzoxifene,AZD9496,AZD9833,bazedoxifene,beta-estradio…
Esrra	estrogen related receptor, alpha	57.56							Nucleus	transcription regulator
ESYT1	extended synaptotagmin 1	579.576							Cytoplasm	other
ESYT2	extended synaptotagmin 2	169.866							Plasma Membrane	other
ETF1	eukaryotic translation termination factor 1	275.113		234.678					Cytoplasm	translation regulator
ETHE1	ETHE1 persulfide dioxygenase							-53.967	Cytoplasm	enzyme
ETS1	ETS proto-oncogene 1, transcription factor	185.806							Nucleus	transcription regulator	unspecified application
ETS2	ETS proto-oncogene 2, transcription factor	225.626							Nucleus	transcription regulator	efficacy
ETV1	ETS variant transcription factor 1	87.611							Nucleus	transcription regulator
ETV4	ETS variant transcription factor 4	169.24							Nucleus	transcription regulator	unspecified application
ETV5	ETS variant transcription factor 5	435.736	-22.752		24.838				Nucleus	transcription regulator
EVC2	EvC ciliary complex subunit 2					32.147			Extracellular Space	other
EVI2A	ecotropic viral integration site 2A	35.784							Plasma Membrane	transmembrane receptor
EVL	Enah/Vasp-like	-302.25			-153.766				Plasma Membrane	other
EVPL	envoplakin						83.545		Plasma Membrane	other
EXO5	exonuclease 5	-83.596							Nucleus	enzyme
EXOC6B	exocyst complex component 6B	82.597							Other	other	unspecified application
EXOSC1	exosome component 1		-250.514					-68.988	Nucleus	enzyme
EXOSC4	exosome component 4		-45.544						Nucleus	enzyme
EXOSC8	exosome component 8					-127.432	-212.688	-228.705	Nucleus	enzyme
EXOSC10	exosome component 10					78.342			Nucleus	kinase
EZR	ezrin	515.004							Plasma Membrane	other	prognosis
F2R	coagulation factor II thrombin receptor	-603.758							Plasma Membrane	G-protein coupled receptor	disease progression	argatroban,bivalirudin,chrysalin,PAR1 inhibitor,vorapaxar
FAAP20	FA core complex associated protein 20	-36.291							Nucleus	other
FABP5	fatty acid binding protein 5	-276.627							Cytoplasm	transporter	disease progression
FADS1	fatty acid desaturase 1	808.366							Plasma Membrane	enzyme
FADS3	fatty acid desaturase 3	189.921		-60.891					Plasma Membrane	enzyme
FAF1	Fas associated factor 1	39.735						-52.578	Nucleus	other
FAM107B	family with sequence similarity 107 member B	-219.683							Other	other
FAM110A	family with sequence similarity 110 member A	-31.711						22.38	Other	other
FAM118B	family with sequence similarity 118 member B	56.391					36.677		Other	other
FAM120A	family with sequence similarity 120A	-210.24							Cytoplasm	other
FAM120C	family with sequence similarity 120C	-119.482							Other	other
FAM136A	family with sequence similarity 136 member A	-79.429							Cytoplasm	other
FAM13B	family with sequence similarity 13 member B	129.379							Cytoplasm	other
FAM161A	FAM161 centrosomal protein A				27.661				Cytoplasm	other
FAM185A	family with sequence similarity 185 member A	-39.921					-41.59	-29.282	Cytoplasm	other
FAM193A	family with sequence similarity 193 member A						66.258		Other	other
FAM216A	family with sequence similarity 216 member A	-211.693							Other	other
FAM3C	FAM3 metabolism regulating signaling molecule C		-158.525						Extracellular Space	cytokine
FAM50A	family with sequence similarity 50 member A	377.84							Nucleus	other
FAM76A	family with sequence similarity 76 member A				-20.85	-41.762			Nucleus	other
FAM76B	family with sequence similarity 76 member B	130.725	73.245	42.236			77.888		Nucleus	other
FANCF	FA complementation group F		-39.95						Nucleus	other
FAR1	fatty acyl-CoA reductase 1	-110.254			-86.608				Cytoplasm	enzyme
FARP1	FERM, ARH/RhoGEF and pleckstrin domain protein 1					66.531	68.245		Plasma Membrane	other
FARP2	FERM, ARH/RhoGEF and pleckstrin domain protein 2	-237.956							Cytoplasm	other
FBF1	Fas binding factor 1	52.531		45.188				75.4	Nucleus	other
FBH1	F-box DNA helicase 1				77.284				Nucleus	enzyme
FBL	fibrillarin	-327.024			138.188				Nucleus	enzyme
FBLIM1	filamin binding LIM protein 1							45.703	Plasma Membrane	other
FBLN2	fibulin 2	-537.63							Extracellular Space	other
FBXL2	F-box and leucine rich repeat protein 2	389.052							Cytoplasm	other
Fbxl22	F-box and leucine-rich repeat protein 22		38.027	41.29		38.648		29.593	Other	enzyme
FBXO2	F-box protein 2					97.33			Cytoplasm	enzyme
FBXO5	F-box protein 5	-159.89							Nucleus	enzyme
FBXO6	F-box protein 6	172.896							Cytoplasm	other
FBXO9	F-box protein 9						47.514		Cytoplasm	enzyme
FBXO32	F-box protein 32	35.194							Cytoplasm	enzyme	efficacy
Fbxo38	F-box protein 38	70.869		34.688		-21.663		-40.981	Other	other
FBXW2	F-box and WD repeat domain containing 2		-64.948			-24.193		-45.597	Cytoplasm	enzyme
FBXW4	F-box and WD repeat domain containing 4	-45.086							Cytoplasm	other
FBXW5	F-box and WD repeat domain containing 5				-212.133				Cytoplasm	other
FCER2	Fc fragment of IgE receptor II	54.553							Plasma Membrane	transmembrane receptor	diagnosis,unspecified application	lumiliximab
FCGR2B	Fc fragment of IgG receptor IIb		-25.344						Plasma Membrane	transmembrane receptor		BI-1206,IgG,XmAb5871
FCHSD2	FCH and double SH3 domains 2	-37.768							Plasma Membrane	other
FDFT1	farnesyl-diphosphate farnesyltransferase 1	1292.17		66.775		132.45			Cytoplasm	enzyme	unspecified application	lapaquistat,zoledronic acid
FDPS	farnesyl diphosphate synthase	2466.66						92.645	Cytoplasm	enzyme		alendronate/cholecalciferol,alendronic acid,ibandronic acid,minodronate,pamidronic acid,risedronic acid,zoledronic acid
FECH	ferrochelatase	-88.496							Cytoplasm	enzyme
FEM1C	fem-1 homolog C				196.472			161.321	Nucleus	transcription regulator
FER	FER tyrosine kinase			54.473					Cytoplasm	kinase		lorlatinib
FEZ2	fasciculation and elongation protein zeta 2			61.886					Cytoplasm	other
FFAR2	free fatty acid receptor 2							30.016	Plasma Membrane	G-protein coupled receptor
FGB	fibrinogen beta chain							27.591	Extracellular Space	other	unspecified application	F2
FGD2	FYVE, RhoGEF and PH domain containing 2				-26.921				Cytoplasm	other
FGD6	FYVE, RhoGEF and PH domain containing 6	75.539							Cytoplasm	other
FGFR1	fibroblast growth factor receptor 1	246.385							Plasma Membrane	kinase	diagnosis,prognosis,unspecified application	3D185,5-azacytidine/sorafenib,ASP5878,bortezomib/sorafenib,clofarabine/cytarabine/sorafenib,crizotinib/pazopanib,cytarabine/idarubicin/sorafenib,debio 1347,decitabine/sorafenib,derazantinib,dexamethasone/lenalidomide/sorafenib,docetaxel/nintedanib,erdafitinib,everolimus/lenvatinib,everolimus/sorafenib,GSK3052230,imatinib/sorafenib,lapatinib/pazopanib,lenvatinib,lenvatinib/pembrolizumab,lucitanib,…
FGFR1OP2	FGFR1 oncogene partner 2				-140.554				Cytoplasm	other
FHDC1	FH2 domain containing 1	-153.914							Cytoplasm	other
FIGNL1	fidgetin like 1	-108.188							Nucleus	enzyme
FIS1	fission, mitochondrial 1	-69.16							Cytoplasm	other
FITM2	fat storage inducing transmembrane protein 2							20.18	Cytoplasm	other	unspecified application
FKBP3	FKBP prolyl isomerase 3	-265.855					212.824		Nucleus	enzyme
FKBP4	FKBP prolyl isomerase 4	-231.74							Nucleus	enzyme
FKBP11	FKBP prolyl isomerase 11		77.12						Cytoplasm	enzyme
FKBP1A	FKBP prolyl isomerase 1A	-222.427	-104.866						Cytoplasm	enzyme	unspecified application	cyclosporine A/sirolimus/tacrolimus,cyclosporine A/tacrolimus,everolimus,everolimus/exemestane,everolimus/fulvestrant,everolimus/gefitinib,everolimus/lenvatinib,everolimus/letrozole,everolimus/paclitaxel,everolimus/panobinostat,everolimus/pasireotide,everolimus/ribociclib,everolimus/sorafenib,everolimus/tamoxifen,everolimus/vandetanib,imatinib/sirolimus,lenalidomide/temsirolimus,methotrexate/siro…
FLCN	folliculin	598.557							Cytoplasm	other
FLOT1	flotillin 1	241.075							Plasma Membrane	other
Fmr1nb	Fmr1 neighbor	-36.724							Nucleus	other
FN1	fibronectin 1		-176.964	-144.155					Extracellular Space	enzyme	diagnosis,efficacy,prognosis,unspecified application	AS1409,bifikafusp alfa,iodine I 131 anti-fibronectin antibody fragment L19-SIP,L19-IL2 monoclonal antibody-cytokine fusion protein/L19TNFalpha,L19TNFalpha,ocriplasmin
FN3KRP	fructosamine 3 kinase related protein			-45.257					Cytoplasm	kinase
FNBP4	formin binding protein 4					-32.441			Nucleus	other
FNDC3B	fibronectin type III domain containing 3B			148.797				108.761	Cytoplasm	other
FNIP1	folliculin interacting protein 1	795.593							Cytoplasm	other
FNIP2	folliculin interacting protein 2	207.121						-20.228	Cytoplasm	other
FOS	Fos proto-oncogene, AP-1 transcription factor subunit	-758.856							Nucleus	transcription regulator	diagnosis,efficacy
FOSB	FosB proto-oncogene, AP-1 transcription factor subunit	-632.912							Nucleus	transcription regulator
FOXF2	forkhead box F2	76.681							Nucleus	transcription regulator
FOXI1	forkhead box I1					31.048			Nucleus	transcription regulator
FOXJ2	forkhead box J2						140.817		Nucleus	transcription regulator
FOXJ3	forkhead box J3	213.911							Nucleus	transcription regulator
FOXK2	forkhead box K2	217.761							Nucleus	transcription regulator
Foxn3	forkhead box N3	75.509							Other	other
FOXO1	forkhead box O1	-35.421							Nucleus	transcription regulator
FOXO3	forkhead box O3	90.563							Nucleus	transcription regulator	efficacy
FPGS	folylpolyglutamate synthase					125.673			Cytoplasm	enzyme		pralatrexate
FRG1	FSHD region gene 1	-39.786							Nucleus	transporter
FRK	fyn related Src family tyrosine kinase			23.176		22.696			Nucleus	kinase		regorafenib,regorafenib/sunitinib
FRMD6	FERM domain containing 6	-137.234							Cytoplasm	other
FRYL	FRY like transcription coactivator						28.915		Other	other
FSCN1	fascin actin-bundling protein 1	-1214.95				500.742	358.843		Cytoplasm	other	unspecified application
FSTL1	follistatin like 1					-368.407			Extracellular Space	other
FUNDC2	FUN14 domain containing 2	-71.422							Cytoplasm	other
FURIN	furin, paired basic amino acid cleaving enzyme				43.689				Cytoplasm	peptidase	unspecified application	furin inhibitor,hexa-D-arginine,nona-D-arginine amide
Fus	fused in sarcoma	-1019.76							Nucleus	transcription regulator
FUT10	fucosyltransferase 10							38.94	Cytoplasm	enzyme
FXR1	FMR1 autosomal homolog 1					-473.916			Cytoplasm	other
FXR2	FMR1 autosomal homolog 2						153.473		Cytoplasm	other
FXYD5	FXYD domain containing ion transport regulator 5	1157.9			-51.507				Plasma Membrane	ion channel
FYN	FYN proto-oncogene, Src family tyrosine kinase	327.187		-53.417		-57.525			Plasma Membrane	kinase	efficacy	afatinib/dasatinib,blinatumomab/dasatinib,dasatinib,dasatinib/erlotinib,dasatinib/filgrastim,dasatinib/inotuzumab ozogamicin,dasatinib/nilotinib,dasatinib/rituximab,JNJ-26483327
FZD2	frizzled class receptor 2				131.172		145.605		Plasma Membrane	G-protein coupled receptor		vantictumab,wnt-5a mimic hexapeptide foxy-5
FZD7	frizzled class receptor 7					-24.205			Plasma Membrane	G-protein coupled receptor		vantictumab
G0S2	G0/G1 switch 2					56.093	77.498		Cytoplasm	other
G2E3	G2/M-phase specific E3 ubiquitin protein ligase	-98.71							Cytoplasm	enzyme
G630093K05Rik	RIKEN cDNA G630093K05 gene				29.941				Other	other
G6PC	glucose-6-phosphatase catalytic subunit	45.06			25.904				Cytoplasm	phosphatase	unspecified application
GAA	glucosidase alpha, acid	1022.54							Cytoplasm	enzyme	diagnosis	acarbose,acarbose/orlistat,miglitol
GAB1	GRB2 associated binding protein 1	-39.941							Cytoplasm	other
GABARAPL1	GABA type A receptor associated protein like 1		-21.92						Cytoplasm	other
GABPA	GA binding protein transcription factor subunit alpha			47.23					Nucleus	transcription regulator
GABPB1	GA binding protein transcription factor subunit beta 1		-123.75						Nucleus	transcription regulator
GABPB2	GA binding protein transcription factor subunit beta 2		-127.202					-116.831	Nucleus	transcription regulator
GADD45A	growth arrest and DNA damage inducible alpha		-215.849	-202.183		-184.642		-235.391	Nucleus	other	efficacy
GALC	galactosylceramidase	54.091							Cytoplasm	enzyme
GALNT2	polypeptide N-acetylgalactosaminyltransferase 2						-140.721		Cytoplasm	enzyme
GALNT13	polypeptide N-acetylgalactosaminyltransferase 13	-44.379							Cytoplasm	enzyme
GALR1	galanin receptor 1					21.263			Plasma Membrane	G-protein coupled receptor
GARS1	glycyl-tRNA synthetase 1	631.985						-427.124	Cytoplasm	enzyme
GAS1	growth arrest specific 1	-402.817							Plasma Membrane	other
GAS7	growth arrest specific 7	100.543							Cytoplasm	other
GAS2L1	growth arrest specific 2 like 1						143.276		Cytoplasm	other
GAS2L3	growth arrest specific 2 like 3				-164.75				Other	other
GASK1A	golgi associated kinase 1A		59.869	28.793					Other	other
GASK1B	golgi associated kinase 1B			272.725					Cytoplasm	other
GATA1	GATA binding protein 1						-28.918	-34.485	Nucleus	transcription regulator
Gata5os	GATA binding protein 5, opposite strand						-22.443		Other	other
GATAD1	GATA zinc finger domain containing 1				-107.378			-93.619	Nucleus	transcription regulator
GATAD2A	GATA zinc finger domain containing 2A			-90.223					Nucleus	transcription regulator
GATAD2B	GATA zinc finger domain containing 2B							142.192	Nucleus	transcription regulator
GBA	glucosylceramidase beta	489.706							Cytoplasm	enzyme
GBF1	golgi brefeldin A resistant guanine nucleotide exchange factor 1	-306.038	150.195	163.048					Cytoplasm	other
GBP2	guanylate binding protein 2						35.928		Cytoplasm	enzyme
GBX2	gastrulation brain homeobox 2				-21.692				Nucleus	transcription regulator
GCC2	GRIP and coiled-coil domain containing 2	-81.529							Cytoplasm	other
GCDH	glutaryl-CoA dehydrogenase		-47.967						Cytoplasm	enzyme
GCH1	GTP cyclohydrolase 1	124.221							Cytoplasm	enzyme
GCLC	glutamate-cysteine ligase catalytic subunit	277.513							Cytoplasm	enzyme
GCLM	glutamate-cysteine ligase modifier subunit				239.221				Cytoplasm	enzyme
GCSH	glycine cleavage system protein H	-597.676							Cytoplasm	enzyme
GDF15	growth differentiation factor 15	56.63							Extracellular Space	growth factor	diagnosis
GDI2	GDP dissociation inhibitor 2		-335.68		-384.466				Cytoplasm	other
GEM	GTP binding protein overexpressed in skeletal muscle	79.578							Plasma Membrane	enzyme
GEMIN5	gem nuclear organelle associated protein 5					357.64			Nucleus	other
GET3	guided entry of tail-anchored proteins factor 3, ATPase	193.435							Nucleus	transporter
GFPT2	glutamine-fructose-6-phosphate transaminase 2							-23.892	Cytoplasm	enzyme
GFRA4	GDNF family receptor alpha 4					47.218			Plasma Membrane	transmembrane receptor
GHITM	growth hormone inducible transmembrane protein	302.133		-318.321		-372.128		-345.968	Cytoplasm	other	unspecified application
GHR	growth hormone receptor			-106.389					Plasma Membrane	transmembrane receptor		GH1,pegvisomant,prednisone/somatotropin,somatrem
GID8	GID complex subunit 8 homolog	-98.653				-68.407			Nucleus	other
GINS2	GINS complex subunit 2	-205.653							Nucleus	other
GIPC1	GIPC PDZ domain containing family member 1		140.423	84.163	212.479				Cytoplasm	other
GIPC3	GIPC PDZ domain containing family member 3	-29.521							Other	other
Gja6	gap junction protein, alpha 6		27.245						Plasma Membrane	transporter
GJC1	gap junction protein gamma 1	34.127							Plasma Membrane	ion channel
GK	glycerol kinase						19.022		Cytoplasm	kinase
GLA	galactosidase alpha	592.021							Cytoplasm	enzyme		migalastat
GLCE	glucuronic acid epimerase	503.976							Cytoplasm	enzyme
GLE1	GLE1 RNA export mediator	62.548				68.775	-35.479		Nucleus	other
GLG1	golgi glycoprotein 1					50.264	116.576		Cytoplasm	other
GLI3	GLI family zinc finger 3						81.032	72.447	Nucleus	transcription regulator	efficacy
GLIPR2	GLI pathogenesis related 2	-199.614							Cytoplasm	other
GLMP	glycosylated lysosomal membrane protein	784.393							Cytoplasm	transcription regulator
GLO1	glyoxalase I	-230.025							Cytoplasm	enzyme
GLRX2	glutaredoxin 2	-225.126							Cytoplasm	enzyme	safety
GLTP	glycolipid transfer protein	-257.854						41.421	Cytoplasm	transporter
Gm773	predicted gene 773	-197.604					-38.263		Other	other
Gm4559	predicted gene 4559						38.767		Other	other
Gm4792	predicted gene 4792							-18.484	Other	other
Gm5784	predicted gene 5784				-21.721				Other	other
Gm5930	predicted gene 5930				-30.701	-38.515			Other	other
Gm6526	--	-26.671							Other	other
Gm6682	tubulin, alpha 1C pseudogene	-880.2							Other	other
Gm7337	DAZ interacting protein 1 pseudogene				-21.416			-27.789	Other	other
Gm8773	predicted gene 8773			-29.719		-22.009		-52.986	Other	other
Gm9833	myelin basic protein expression factor 2, repressor pseudogene	-186.918							Other	other
Gm10130	predicted gene 10130			25.122					Other	other
Gm10190	predicted gene 10190							121.52	Other	other
Gm10638	predicted gene 10638					34.976			Other	other
Gm11007	predicted gene 11007			146.49					Other	other
Gm11009	predicted gene 11009						32.473		Other	other
Gm11541	predicted gene 11541					25.624			Other	other
Gm12666	predicted gene 12666	-112.549		73.42		43.02			Other	other
Gm14410	predicted gene 14410				-95.069				Other	other
Gm20604	predicted gene 20604					-29.749			Other	other
Gm13695 (includes others)	CWC22 spliceosome-associated protein homolog pseudogene		-117.433						Other	other
Gm16440 (includes others)	predicted gene 16440	-21.676		26.855	-30.046				Other	other
Gm2016 (includes others)	predicted gene 8300		29.623						Other	other
Gm3383 (includes others)	predicted gene 5797	57.628		-22.265	-58.156		-40.031		Other	other
Gm4836 (includes others)	predicted gene 4836	-37.642			-26.298	-48.543	-30.968		Nucleus	other
Gm9780 (includes others)	predicted gene 9780				47.884				Other	other
GMDS	GDP-mannose 4,6-dehydratase							184.004	Cytoplasm	enzyme
GNA12	G protein subunit alpha 12	-186.098							Plasma Membrane	enzyme	response to therapy
GNAI2	G protein subunit alpha i2	-1000.29							Plasma Membrane	enzyme
GNB3	G protein subunit beta 3			41.26					Plasma Membrane	enzyme	safety,unspecified application
GNE	glucosamine (UDP-N-acetyl)-2-epimerase/N-acetylmannosamine kinase	-155.822							Cytoplasm	kinase
GNL1	G protein nucleolar 1 (putative)						57.644		Nucleus	other
GNL3	G protein nucleolar 3	356.852					-80.037		Nucleus	other
GNPDA1	glucosamine-6-phosphate deaminase 1				-30.733				Cytoplasm	enzyme
GNPNAT1	glucosamine-phosphate N-acetyltransferase 1				-89.999	-82.406	-104.002		Cytoplasm	enzyme
GNPTG	N-acetylglucosamine-1-phosphate transferase subunit gamma	95.55				88.983			Cytoplasm	enzyme
GOLGA4	golgin A4	122.402							Cytoplasm	other
GOLGA5	golgin A5	175.707							Cytoplasm	kinase
GOLGA7	golgin A7			-54.979		-68.488		-53.814	Cytoplasm	other
GOLM2	golgi membrane protein 2	-234.374							Cytoplasm	other
GOLPH3	golgi phosphoprotein 3	143.508		295.76					Cytoplasm	other
GOLT1B	golgi transport 1B	-25.512						-24.781	Cytoplasm	other
GORAB	golgin, RAB6 interacting		73.116						Cytoplasm	other
GORASP2	golgi reassembly stacking protein 2				66.7				Cytoplasm	other
GOT1	glutamic-oxaloacetic transaminase 1	421.514	-105.762						Cytoplasm	enzyme
GPAT3	glycerol-3-phosphate acyltransferase 3	284.516							Cytoplasm	enzyme
GPATCH2L	G-patch domain containing 2 like			-72.252		-66.204			Other	other
GPBP1	GC-rich promoter binding protein 1						-159.326		Nucleus	transcription regulator
GPBP1L1	GC-rich promoter binding protein 1 like 1					-66.132			Other	other
GPD2	glycerol-3-phosphate dehydrogenase 2				65.68				Cytoplasm	enzyme
GPI	glucose-6-phosphate isomerase	556.016		411.558	510.453				Extracellular Space	enzyme	unspecified application
GPNMB	glycoprotein nmb	1697.71							Plasma Membrane	enzyme	unspecified application	glembatumumab,glembatumumab vedotin
GPR182	G protein-coupled receptor 182		49.342						Plasma Membrane	G-protein coupled receptor
GPR137B	G protein-coupled receptor 137B				250.906				Plasma Membrane	other
Gpr137b-ps	G protein-coupled receptor 137B, pseudogene	427.29							Other	other
GPS1	G protein pathway suppressor 1	-285.973							Nucleus	other
GPS2	G protein pathway suppressor 2	114.81							Nucleus	transcription regulator
GPX1	glutathione peroxidase 1	-1061.87	-291.75	-243.486					Cytoplasm	enzyme	diagnosis,efficacy
GPX7	glutathione peroxidase 7	-99.883							Cytoplasm	enzyme
GRAMD1B	GRAM domain containing 1B	28.21							Other	other
GRAMD2B	GRAM domain containing 2B							-18.855	Extracellular Space	other
GRHPR	glyoxylate and hydroxypyruvate reductase					164.3			Cytoplasm	enzyme
GRN	granulin precursor	2221.25							Extracellular Space	growth factor
GRPEL2	GrpE like 2, mitochondrial	119.83							Cytoplasm	other
GRWD1	glutamate rich WD repeat containing 1		40.455						Nucleus	other
GSG1L2	GSG1 like 2				27.495				Other	other
GSKIP	GSK3B interacting protein	-49.831							Nucleus	other
Gsta4	glutathione S-transferase, alpha 4	-1406.77							Other	enzyme
GSTA5	glutathione S-transferase alpha 5					21.095		27.454	Cytoplasm	enzyme
GSTM1	glutathione S-transferase mu 1	-205.478							Cytoplasm	enzyme	diagnosis,efficacy,safety,unspecified application
GSTM5	glutathione S-transferase mu 5	-125.414							Cytoplasm	enzyme	diagnosis,prognosis
Gstm6	glutathione S-transferase, mu 6	-29.632							Cytoplasm	enzyme
GSTO2	glutathione S-transferase omega 2	51.932							Cytoplasm	enzyme
GTF2E2	general transcription factor IIE subunit 2							117.236	Nucleus	transcription regulator
GTF3C6	general transcription factor IIIC subunit 6	-129.783			84.095				Nucleus	transcription regulator
GTPBP1	GTP binding protein 1							-73.256	Cytoplasm	enzyme
GTPBP2	GTP binding protein 2	271.811							Extracellular Space	enzyme
GTPBP4	GTP binding protein 4			132.484					Nucleus	enzyme
GTPBP6	GTP binding protein 6 (putative)	71.793							Other	other
GYG1	glycogenin 1	71.518	-20.232	-22.939		-47.643		-24.441	Cytoplasm	enzyme
H1-2	H1.2 linker histone, cluster member				-66.661		-117.479	-50.718	Nucleus	other
H1f1	H1.1 linker histone, cluster member	-316.542							Nucleus	other
H2AC8	H2A clustered histone 8	-1424.49							Nucleus	other
H2AC11	H2A clustered histone 11	-991.292							Nucleus	other
H2AC12	H2A clustered histone 12	-1222.89							Nucleus	other
H2AC17	H2A clustered histone 17	-1258.16							Nucleus	other
H2AC21	H2A clustered histone 21	-234.334							Nucleus	other
H2ac24	H2A clustered histone 24	-1424.49							Nucleus	other
H2AX	H2A.X variant histone	-805.476							Nucleus	transcription regulator	efficacy
H2BC3	H2B clustered histone 3	-468.637							Nucleus	other
H2BC4	H2B clustered histone 4	-312.861							Nucleus	other
H2BC8	H2B clustered histone 8	-884.99							Nucleus	other
H2BC9	H2B clustered histone 9				38.206				Nucleus	other
H2BC12	H2B clustered histone 12	-719.899							Nucleus	other
H2BC14	H2B clustered histone 14	-649.849							Nucleus	other
H2BC17	H2B clustered histone 17	-285.624							Nucleus	other
H3-5	H3.5 histone							30.107	Other	other
H3C7	H3 clustered histone 7	-989.17							Nucleus	other
H3C13	H3 clustered histone 13	-597.527							Nucleus	other
H3C15	H3 clustered histone 15	-471.342							Nucleus	other
H4C4	H4 clustered histone 4	-814.149							Nucleus	other
H4C6	H4 clustered histone 6	-506.868							Nucleus	other
H4C9	H4 clustered histone 9	-575.191							Nucleus	other
H4C11	H4 clustered histone 11	-612.76							Nucleus	other
H4C14	H4 clustered histone 14	-747.588							Nucleus	other
H4C15	H4 clustered histone 15	-994.295							Nucleus	other
HACD1	3-hydroxyacyl-CoA dehydratase 1			-70.674					Cytoplasm	enzyme
HACD2	3-hydroxyacyl-CoA dehydratase 2		262.801						Cytoplasm	phosphatase
HACD4	3-hydroxyacyl-CoA dehydratase 4	-109.937							Cytoplasm	enzyme
HADH	hydroxyacyl-CoA dehydrogenase				134.328				Cytoplasm	enzyme	unspecified application
HARBI1	harbinger transposase derived 1			-36.488					Cytoplasm	other
HAUS6	HAUS augmin like complex subunit 6					-236.798			Cytoplasm	other
HBEGF	heparin binding EGF like growth factor	-100.103							Extracellular Space	growth factor	diagnosis,unspecified application	KHK2866,U3-1565
HBP1	HMG-box transcription factor 1	195.777							Nucleus	transcription regulator
HDAC1	histone deacetylase 1	-579.145							Nucleus	transcription regulator	efficacy	belinostat,bortezomib/vorinostat,domatinostat,HDAC class I inhibitors,mocetinostat,OKI-179,pyroxamide,R 306465,trametinib/vorinostat,tributyrin,vorinostat
HDAC4	histone deacetylase 4	47.672							Nucleus	transcription regulator		belinostat,OKI-179,pyroxamide,tributyrin
HDAC5	histone deacetylase 5	115.139						-22.143	Nucleus	transcription regulator		belinostat,pyroxamide,tributyrin
HDAC7	histone deacetylase 7	-129.692					76.074		Nucleus	transcription regulator		belinostat,pyroxamide,tributyrin
HDAC11	histone deacetylase 11	-50.823							Nucleus	transcription regulator		belinostat,pyroxamide,tributyrin
HDDC2	HD domain containing 2	-139.469						-33.251	Cytoplasm	other
HEATR3	HEAT repeat containing 3	-280.77							Other	other
HELB	DNA helicase B	113.242							Nucleus	enzyme		capecitabine/epirubicin/oxaliplatin,chlorambucil/epirubicin,cyclophosphamide/docetaxel/epirubicin,cyclophosphamide/docetaxel/epirubicin/5-fluorouracil,cyclophosphamide/docetaxel/epirubicin/5-fluorouracil/trastuzumab,cyclophosphamide/epirubicin,cyclophosphamide/epirubicin/5-fluorouracil,cyclophosphamide/epirubicin/5-fluorouracil/paclitaxel,cyclophosphamide/epirubicin/5-fluorouracil/paclitaxel/tras…
HELQ	helicase, POLQ like	116.567							Nucleus	enzyme
HERPUD1	homocysteine inducible ER protein with ubiquitin like domain 1	735.148							Cytoplasm	other
HERPUD2	HERPUD family member 2	264.817							Other	other
HES1	hes family bHLH transcription factor 1	-50.737							Nucleus	transcription regulator
HES5	hes family bHLH transcription factor 5	35.297	31.61			60.348			Nucleus	transcription regulator
HEXA	hexosaminidase subunit alpha	820.788							Cytoplasm	enzyme
HEXB	hexosaminidase subunit beta	340.999							Cytoplasm	enzyme
HHIPL1	HHIP like 1	70.583							Other	other
HIBADH	3-hydroxyisobutyrate dehydrogenase	-285.168							Cytoplasm	enzyme
HIBCH	3-hydroxyisobutyryl-CoA hydrolase	-88.098							Cytoplasm	enzyme
HIF1AN	hypoxia inducible factor 1 subunit alpha inhibitor	-205.404		-134.474					Nucleus	enzyme
HIGD2A	HIG1 hypoxia inducible domain family member 2A	53.426		-80.223					Cytoplasm	other
HINT1	histidine triad nucleotide binding protein 1				-207.73		-220.946		Nucleus	enzyme	prognosis
HINT3	histidine triad nucleotide binding protein 3			-112.184					Cytoplasm	enzyme
HIP1R	huntingtin interacting protein 1 related					-44.318			Cytoplasm	other
HIPK1	homeodomain interacting protein kinase 1	570.458							Nucleus	kinase
HIPK2	homeodomain interacting protein kinase 2	-811.416			-396.709				Nucleus	kinase
HIRA	histone cell cycle regulator							22.09	Nucleus	transcription regulator
HIRIP3	HIRA interacting protein 3	76.283						72.713	Nucleus	other
HJURP	Holliday junction recognition protein	-331.884							Nucleus	other
HK1	hexokinase 1	315.075		141.384					Cytoplasm	kinase
HK2	hexokinase 2	188.959							Cytoplasm	kinase
HLA-A	major histocompatibility complex, class I, A						21.156		Plasma Membrane	other	efficacy,response to therapy
HLA-DMB	major histocompatibility complex, class II, DM beta		-51.949	-78.206	-62.121			-68.688	Plasma Membrane	transmembrane receptor
HLA-DRB5	major histocompatibility complex, class II, DR beta 5		21.374						Plasma Membrane	transmembrane receptor
HMCES	5-hydroxymethylcytosine binding, ES cell specific					34.813			Nucleus	other
HMGA1	high mobility group AT-hook 1	1241.94							Nucleus	transcription regulator	unspecified application
HMGB2	high mobility group box 2	-218.667							Nucleus	transcription regulator	unspecified application
HMGCL	3-hydroxy-3-methylglutaryl-CoA lyase					46.711			Cytoplasm	enzyme
HMGCS1	3-hydroxy-3-methylglutaryl-CoA synthase 1	1867.34	512.647						Cytoplasm	enzyme
Hmgn3	high mobility group nucleosomal binding domain 3	-333.928							Nucleus	other
HMMR	hyaluronan mediated motility receptor	-323.435							Plasma Membrane	transmembrane receptor
HMOX1	heme oxygenase 1	754.124							Cytoplasm	enzyme	efficacy,safety,unspecified application	tin mesoporphyrin
HNRNPA2B1	heterogeneous nuclear ribonucleoprotein A2/B1	-626.318							Nucleus	other
HNRNPAB	heterogeneous nuclear ribonucleoprotein A/B	-531.136							Nucleus	enzyme
HNRNPDL	heterogeneous nuclear ribonucleoprotein D like							-260.565	Nucleus	other	unspecified application
HNRNPH1	heterogeneous nuclear ribonucleoprotein H1	-1121.1							Nucleus	other	diagnosis
HOMER1	homer scaffold protein 1					76.011			Plasma Membrane	other
HOXA6	homeobox A6				-20.684			-32.061	Nucleus	transcription regulator
HOXB2	homeobox B2	34.865						43.649	Nucleus	transcription regulator	diagnosis
HOXB5	homeobox B5				-49.608				Nucleus	transcription regulator	diagnosis
HOXC9	homeobox C9	33.298							Nucleus	transcription regulator
HOXD8	homeobox D8	-93.794							Nucleus	transcription regulator
HOXD9	homeobox D9	-27.052							Nucleus	transcription regulator
HPS5	HPS5 biogenesis of lysosomal organelles complex 2 subunit 2		37.046						Cytoplasm	other	diagnosis
HRAS	HRas proto-oncogene, GTPase	-127.746							Plasma Membrane	enzyme	prognosis,safety	ISIS 2503
HS2ST1	heparan sulfate 2-O-sulfotransferase 1	76.744							Cytoplasm	enzyme
HS6ST3	heparan sulfate 6-O-sulfotransferase 3		23.325						Other	enzyme
HSBP1	heat shock factor binding protein 1			-52.647					Nucleus	other
HSD17B7	hydroxysteroid 17-beta dehydrogenase 7	538.102							Cytoplasm	enzyme
HSD17B10	hydroxysteroid 17-beta dehydrogenase 10	-313.841				107.554			Cytoplasm	enzyme
HSD17B11	hydroxysteroid 17-beta dehydrogenase 11	152.365			59.906				Cytoplasm	enzyme
HSD3B7	hydroxy-delta-5-steroid dehydrogenase, 3 beta- and steroid delta-isomerase 7	159.083							Cytoplasm	enzyme
Hsdl2	hydroxysteroid dehydrogenase like 2	-82.776							Cytoplasm	other
HSH2D	hematopoietic SH2 domain containing	29.646	44.043						Cytoplasm	other
HSPA5	heat shock protein family A (Hsp70) member 5	-866.754							Cytoplasm	enzyme	efficacy,unspecified application	PAT-SM6
HSPA8	heat shock protein family A (Hsp70) member 8		153.048	301.383					Cytoplasm	enzyme	diagnosis
HSPA12A	heat shock protein family A (Hsp70) member 12A	523.44							Cytoplasm	other
Hspa1b	heat shock protein 1B		75.435						Cytoplasm	other
HSPA4L	heat shock protein family A (Hsp70) member 4 like	1234.38							Cytoplasm	other
HSPD1	heat shock protein family D (Hsp60) member 1		-489.188				-475.667		Cytoplasm	enzyme	diagnosis,prognosis
HSPE1	heat shock protein family E (Hsp10) member 1						-974.504		Cytoplasm	enzyme
HSPH1	heat shock protein family H (Hsp110) member 1	-558.532							Cytoplasm	other
HTR2C	5-hydroxytryptamine receptor 2C					42.004			Plasma Membrane	G-protein coupled receptor	safety	agomelatine,apomorphine,aripiprazole,asenapine,blonanserin,buspirone,caffeine/ergotamine,chlorprothixene,clomipramine,cyproheptadine,dexamethasone/olanzapine,dihydroergotamine,doxepin,epinastine,ergotamine,fenfluramine,fenfluramine/phentermine,fluoxetine/olanzapine,lisuride,lorcaserin,methysergide,mirtazapine,nefazodone,olanzapine,opipramol,paliperidone,pimavanserin,quetiapine,risperidone,sertind…
HUS1	HUS1 checkpoint clamp component	-75.697							Nucleus	kinase
HYLS1	HYLS1 centriolar and ciliogenesis associated		-60.957						Nucleus	other
HYOU1	hypoxia up-regulated 1			69.294	241.116	153.396		138.506	Cytoplasm	other
IAH1	isoamyl acetate hydrolyzing esterase 1 (putative)	305.032							Cytoplasm	other
IAPP	islet amyloid polypeptide							114.623	Extracellular Space	other	efficacy
IARS2	isoleucyl-tRNA synthetase 2, mitochondrial	-94.412					-46.909	-77.036	Cytoplasm	enzyme
IBA57	iron-sulfur cluster assembly factor IBA57		28.799						Cytoplasm	other
ICMT	isoprenylcysteine carboxyl methyltransferase					75.641			Cytoplasm	enzyme
ID1	inhibitor of DNA binding 1, HLH protein	-503.289			-158.057				Nucleus	transcription regulator	disease progression
ID2	inhibitor of DNA binding 2	-515.787							Nucleus	transcription regulator
ID3	inhibitor of DNA binding 3, HLH protein	-101.085							Nucleus	transcription regulator
IDH3A	isocitrate dehydrogenase (NAD(+)) 3 catalytic subunit alpha							-154.761	Cytoplasm	enzyme
IDH3G	isocitrate dehydrogenase (NAD(+)) 3 non-catalytic subunit gamma							80.717	Cytoplasm	enzyme
IDI1	isopentenyl-diphosphate delta isomerase 1	831.526							Cytoplasm	enzyme
IDNK	IDNK gluconokinase					135.102			Cytoplasm	other
IDS	iduronate 2-sulfatase	-144.978							Cytoplasm	enzyme
IFFO2	intermediate filament family orphan 2	74.058							Other	other
IFI35	interferon induced protein 35			29.051					Nucleus	other
Ifi202b	interferon activated gene 202B	163.584					68.453		Nucleus	other
IFRD1	interferon related developmental regulator 1	936.781						-80.469	Nucleus	other
IFT43	intraflagellar transport 43							57.846	Cytoplasm	other
IFT57	intraflagellar transport 57	-143.493							Cytoplasm	other	disease progression
IFT74	intraflagellar transport 74				-95.978			121.357	Cytoplasm	other
IFT80	intraflagellar transport 80	-62.099							Extracellular Space	other
IGBP1	immunoglobulin binding protein 1				-157.928			-115.103	Cytoplasm	phosphatase
IGF1	insulin like growth factor 1	-338.797							Extracellular Space	growth factor	diagnosis,efficacy,prognosis,safety	BI 836845,MEDI-573
IGF1R	insulin like growth factor 1 receptor							39.288	Plasma Membrane	transmembrane receptor	diagnosis,efficacy,prognosis,unspecified application	[111In]-FPI-1547,[225Ac]-FPI-1434,[I-124]-CPD-1028,AVE1642,BIIB022,BMS-754807,brigatinib,ceritinib,cixutumumab,dalotuzumab,ganitumab,IGF-1R inhibitor,IGF-methotrexate conjugate,IGF1,insulin glargine,insulin glargine/lixisenatide,istiratumab,KW-2450,linsitinib,picropodophyllin,PL225B,teprotumumab,XL228
IGFBP4	insulin like growth factor binding protein 4							-88.163	Extracellular Space	other
IGFBP7	insulin like growth factor binding protein 7	-786.14							Extracellular Space	transporter
IGLON5	IgLON family member 5	-34.818							Other	other
IKBKB	inhibitor of nuclear factor kappa B kinase subunit beta	47.582							Cytoplasm	kinase	unspecified application	auranofin,IKKbeta inhibitor
IKZF2	IKAROS family zinc finger 2	-30.513							Nucleus	transcription regulator
IL22	interleukin 22	20.897						19.908	Extracellular Space	cytokine
IL10RB	interleukin 10 receptor subunit beta	50.942							Plasma Membrane	transmembrane receptor
IL2RB	interleukin 2 receptor subunit beta					23.158			Plasma Membrane	transmembrane receptor	efficacy	aldesleukin,bempegaldesleukin,daclizumab,denileukin diftitox,monoclonal antibody Mik-Beta-1
IL4R	interleukin 4 receptor		44.437						Plasma Membrane	transmembrane receptor	response to therapy,unspecified application	dupilumab,MDNA55
IL6R	interleukin 6 receptor	105.265							Plasma Membrane	transmembrane receptor	efficacy	methotrexate/sarilumab,methotrexate/tocilizumab,sarilumab,tocilizumab
ILVBL	ilvB acetolactate synthase like			21.929					Cytoplasm	enzyme
IMMP1L	inner mitochondrial membrane peptidase subunit 1		31.413						Cytoplasm	other
Inafm2	InaF motif containing 2	-41.533							Other	other
INF2	inverted formin 2				-43.974	-42.912	138.028		Cytoplasm	other
ING3	inhibitor of growth family member 3	93.525					25.831		Nucleus	other
INHBA	inhibin subunit beta A	-217.045							Extracellular Space	growth factor	diagnosis	activin type 2B receptor Fc fusion protein STM 343,garetosmab
INO80B	INO80 complex subunit B					37.317		-54.842	Nucleus	other
INPP5F	inositol polyphosphate-5-phosphatase F					-76.091			Plasma Membrane	phosphatase
INSIG1	insulin induced gene 1	1487.69							Cytoplasm	other
INSIG2	insulin induced gene 2							20.66	Cytoplasm	other	diagnosis
INSYN1	inhibitory synaptic factor 1	-53.301							Plasma Membrane	other
INTS5	integrator complex subunit 5		38.425	73.264					Nucleus	other
INTS8	integrator complex subunit 8	-101.078							Nucleus	other
INTS12	integrator complex subunit 12	170.925			68.153				Nucleus	other
INTS6L	integrator complex subunit 6 like	62.141							Nucleus	other
IPO7	importin 7	184.482							Nucleus	transporter
IPO11	importin 11	-111.765							Nucleus	other
IPP	intracisternal A particle-promoted polypeptide				-19.638				Cytoplasm	other
IQCC	IQ motif containing C					31.213			Other	other
IQCK	IQ motif containing K				19.854				Other	other
IQGAP1	IQ motif containing GTPase activating protein 1	381.2							Cytoplasm	other
IRAK1	interleukin 1 receptor associated kinase 1				48.542				Plasma Membrane	kinase
IREB2	iron responsive element binding protein 2	-87.118							Cytoplasm	translation regulator
IRF1	interferon regulatory factor 1		81.834					64.319	Nucleus	transcription regulator
IRF2	interferon regulatory factor 2					111.295			Nucleus	transcription regulator
IRF2BP2	interferon regulatory factor 2 binding protein 2	74.132							Nucleus	transcription regulator
Irgm1	immunity-related GTPase family M member 1							77.334	Cytoplasm	other
IRS1	insulin receptor substrate 1				19.691				Cytoplasm	enzyme	efficacy
Irx5	Iroquois homeobox 5							-34.041	Nucleus	other
ISCA1	iron-sulfur cluster assembly 1					111.063			Cytoplasm	other
ISCU	iron-sulfur cluster assembly enzyme	-219.988							Cytoplasm	other
ISLR	immunoglobulin superfamily containing leucine rich repeat	-26.527							Extracellular Space	other
ISOC1	isochorismatase domain containing 1	-171.287							Cytoplasm	enzyme	unspecified application
IST1	IST1 factor associated with ESCRT-III						-110.947	-150.658	Cytoplasm	other
ISY1-RAB43	ISY1-RAB43 readthrough	-169.76							Nucleus	other
ISYNA1	inositol-3-phosphate synthase 1	-144.925			46.163				Cytoplasm	enzyme
ITFG1	integrin alpha FG-GAP repeat containing 1							418.825	Plasma Membrane	other
ITGA6	integrin subunit alpha 6				-72.143				Plasma Membrane	transmembrane receptor
ITGAV	integrin subunit alpha V					-108.208			Plasma Membrane	transmembrane receptor	diagnosis	68Ga-NOTA-BBN-RGD,abciximab,abituzumab,cilengitide,etaracizumab,fluciclatide F 18,intetumumab
ITGB1	integrin subunit beta 1					-152.432		-80.93	Plasma Membrane	transmembrane receptor	disease progression,prognosis
ITGB1BP1	integrin subunit beta 1 binding protein 1	155.451							Plasma Membrane	other
ITGB3BP	integrin subunit beta 3 binding protein	-69.931	-27.046						Nucleus	other
ITGBL1	integrin subunit beta like 1	61.143							Extracellular Space	other
ITPR1	inositol 1,4,5-trisphosphate receptor type 1							64.746	Cytoplasm	ion channel
ITPR2	inositol 1,4,5-trisphosphate receptor type 2	156.101				-47.578			Cytoplasm	ion channel
ITPRIP	inositol 1,4,5-trisphosphate receptor interacting protein	74.98							Extracellular Space	other
JADE1	jade family PHD finger 1	-299.49							Nucleus	transcription regulator
JADE2	jade family PHD finger 2							79.082	Nucleus	enzyme
JAGN1	jagunal homolog 1							-58.849	Cytoplasm	other
JAK3	Janus kinase 3	94.557							Cytoplasm	kinase	efficacy	methotrexate/tofacitinib,PF-06651600,R-348,tofacitinib
JMJD1C	jumonji domain containing 1C	210.509						57.502	Nucleus	enzyme
JOSD2	Josephin domain containing 2	143.721							Cytoplasm	enzyme
JTB	jumping translocation breakpoint	298.484							Plasma Membrane	other
JUN	Jun proto-oncogene, AP-1 transcription factor subunit	637.693							Nucleus	transcription regulator	prognosis
JUND	JunD proto-oncogene, AP-1 transcription factor subunit	394.166							Nucleus	transcription regulator
JUP	junction plakoglobin				49.563	-35.373			Plasma Membrane	other	diagnosis,unspecified application
KANK2	KN motif and ankyrin repeat domains 2	-22.689							Nucleus	transcription regulator
KANK3	KN motif and ankyrin repeat domains 3		-33.977						Cytoplasm	other
KAT2A	lysine acetyltransferase 2A	-245.548							Cytoplasm	enzyme
KAT6A	lysine acetyltransferase 6A					-21.751			Nucleus	enzyme
Kat6b	K(lysine) acetyltransferase 6B							68.21	Nucleus	enzyme
KBTBD8	kelch repeat and BTB domain containing 8				-31.558				Cytoplasm	other
KCNAB2	potassium voltage-gated channel subfamily A regulatory beta subunit 2			29.158	52.69				Plasma Membrane	ion channel
KCNH7	potassium voltage-gated channel subfamily H member 7	-24.774			-23.268				Plasma Membrane	ion channel		dextromethorphan/quinidine,procainamide,quinidine
KCNJ14	potassium inwardly rectifying channel subfamily J member 14					32.004			Plasma Membrane	ion channel
KCNK3	potassium two pore domain channel subfamily K member 3				49.25				Plasma Membrane	ion channel		amiodarone,doxapram,halothane,nicorandil
KCNMB1	potassium calcium-activated channel subfamily M regulatory beta subunit 1					35.223			Plasma Membrane	ion channel		tedisamil
KCTD9	potassium channel tetramerization domain containing 9		62.417						Other	other
KCTD16	potassium channel tetramerization domain containing 16					52.025			Plasma Membrane	other
KCTD20	potassium channel tetramerization domain containing 20	-70.483			72.637				Cytoplasm	other
KDELR1	KDEL endoplasmic reticulum protein retention receptor 1	-142.281							Cytoplasm	transporter	unspecified application
KDM4A	lysine demethylase 4A				48.693				Nucleus	transcription regulator
KDM5A	lysine demethylase 5A	35.669							Nucleus	transcription regulator
KDM6B	lysine demethylase 6B	132.949			-22.703				Extracellular Space	enzyme
KDM7A	lysine demethylase 7A	130.524							Nucleus	enzyme
KDSR	3-ketodihydrosphingosine reductase	297.883							Plasma Membrane	enzyme
KHSRP	KH-type splicing regulatory protein		-222.271						Nucleus	enzyme	unspecified application
KIAA1109	KIAA1109	157.869							Other	other
KIAA1549	KIAA1549	-102.142							Plasma Membrane	other
KIAA2013	KIAA2013					31.663			Other	other
KIAA0319L	KIAA0319 like				-76.38	-60.767			Cytoplasm	other
KIAA0895L	KIAA0895 like				28.288				Other	other
KIF11	kinesin family member 11	-162.269							Nucleus	other		4SC-205,ALN-VSP02,AZD4877,filanesib,ispinesib,litronesib,MK-0731,SB-743921
KIF3A	kinesin family member 3A		-49.069						Cytoplasm	enzyme
KIF3C	kinesin family member 3C	149.095	125		95.391			137.413	Cytoplasm	other
KLC1	kinesin light chain 1			91.718					Cytoplasm	other
KLC2	kinesin light chain 2	99.366				20.88			Cytoplasm	other
KLF2	Kruppel like factor 2	150.182							Nucleus	transcription regulator
KLF3	Kruppel like factor 3	89.51							Nucleus	transcription regulator
KLF4	Kruppel like factor 4	657.606							Nucleus	transcription regulator
KLF5	Kruppel like factor 5		-48.799						Nucleus	transcription regulator
KLF6	Kruppel like factor 6	869.731							Nucleus	transcription regulator
KLF9	Kruppel like factor 9				-86.427			-167.34	Nucleus	transcription regulator
KLF10	Kruppel like factor 10					93.417			Nucleus	transcription regulator
KLF11	Kruppel like factor 11	108.105							Nucleus	transcription regulator
KLF13	Kruppel like factor 13	131.266							Nucleus	transcription regulator
KLHDC2	kelch domain containing 2	-61.779							Cytoplasm	other
KLHDC4	kelch domain containing 4				-34.347				Other	other
KLHDC8A	kelch domain containing 8A		75.501						Other	other
KLHL2	kelch like family member 2				-27.095				Cytoplasm	other
KLHL17	kelch like family member 17						55.763		Cytoplasm	other
KLHL21	kelch like family member 21	133.296							Cytoplasm	other
KLHL22	kelch like family member 22	-329.048					137.36		Cytoplasm	other
KLHL24	kelch like family member 24	437.743							Plasma Membrane	other
KMT5A	lysine methyltransferase 5A	-655.018							Nucleus	enzyme
KMT5B	lysine methyltransferase 5B	111.625							Nucleus	enzyme
KRCC1	lysine rich coiled-coil 1						-35.518		Extracellular Space	other
KRR1	KRR1 small subunit processome component homolog						-37.736		Nucleus	other
KRT12	keratin 12	23.402				-33.822			Cytoplasm	other
Krt90	keratin 90				27.754				Cytoplasm	other
KRTAP10-7	keratin associated protein 10-7		-34.874			30.714	-38.242	-19.036	Cytoplasm	other
Krtap4-8	keratin associated protein 4-8					36.664			Other	other
KRTAP4-9	keratin associated protein 4-9					20			Cytoplasm	other
L3MBTL1	L3MBTL histone methyl-lysine binding protein 1			69.025					Nucleus	other
LACC1	laccase domain containing 1			-78.43					Cytoplasm	enzyme
Lage3	L antigen family, member 3	-292.017							Nucleus	other
LAMB1	laminin subunit beta 1	196.06							Extracellular Space	other
LAMB2	laminin subunit beta 2		52.543						Extracellular Space	enzyme
LAMC1	laminin subunit gamma 1					137.917			Extracellular Space	other
LAMP2	lysosomal associated membrane protein 2	1278.92							Plasma Membrane	enzyme
LAMTOR4	late endosomal/lysosomal adaptor, MAPK and MTOR activator 4							-24.679	Cytoplasm	other
LAPTM4A	lysosomal protein transmembrane 4 alpha	399.33							Cytoplasm	other
Larp1b	La ribonucleoprotein domain family, member 1B	-75.852							Nucleus	other
LARS1	leucyl-tRNA synthetase 1	138.244						-126.237	Cytoplasm	enzyme
LATS2	large tumor suppressor kinase 2					-40.467			Nucleus	kinase
Lbhd2	LBH domain containing 2					22.247			Other	other
LBP	lipopolysaccharide binding protein		29.178					32.819	Plasma Membrane	transporter	diagnosis,efficacy
LBR	lamin B receptor	299.616							Nucleus	enzyme
Lce1a2	late cornified envelope 1A2	-33.846		49.339					Other	other
Lce1g	late cornified envelope 1G						-38.424		Other	other
Lce3a (includes others)	late cornified envelope 3A	24.149						22.598	Other	other
LCLAT1	lysocardiolipin acyltransferase 1				42.458				Cytoplasm	enzyme
LCOR	ligand dependent nuclear receptor corepressor		27.056				27.332		Nucleus	transcription regulator
LDB1	LIM domain binding 1	222.151							Nucleus	transcription regulator
LDLR	low density lipoprotein receptor	584.766							Plasma Membrane	transporter	disease progression,unspecified application	iodine I 131 iodocholesterol
LDLRAD3	low density lipoprotein receptor class A domain containing 3							-105.248	Plasma Membrane	other
LDLRAP1	low density lipoprotein receptor adaptor protein 1	94.212						73.232	Cytoplasm	transporter
LEKR1	leucine, glutamate and lysine rich 1					-24.178			Other	other
LENG8	leukocyte receptor cluster member 8	213.665							Other	other
LEPROTL1	leptin receptor overlapping transcript like 1	229.488							Plasma Membrane	other
LETM1	leucine zipper and EF-hand containing transmembrane protein 1	-80.681							Cytoplasm	transporter
LGALS3	galectin 3	1471.8							Extracellular Space	other	diagnosis,unspecified application	GCS-100,GR-MD-02
LGALS8	galectin 8							31.381	Extracellular Space	other
LGMN	legumain	618.077							Cytoplasm	peptidase
LGR4	leucine rich repeat containing G protein-coupled receptor 4	-223.55							Plasma Membrane	transmembrane receptor
LHPP	phospholysine phosphohistidine inorganic pyrophosphate phosphatase	-36.252							Cytoplasm	phosphatase
LIG1	DNA ligase 1		74.649						Nucleus	enzyme
LIMA1	LIM domain and actin binding 1	-605.101							Cytoplasm	other
LIMD2	LIM domain containing 2	-97.332							Other	other	unspecified application
LIMS1	LIM zinc finger domain containing 1	-560.356							Plasma Membrane	other
LIN7C	lin-7 homolog C, crumbs cell polarity complex component				-270.064		-262.313		Cytoplasm	other
LIPT2	lipoyl(octanoyl) transferase 2			-64.825				-69.687	Cytoplasm	enzyme
LITAF	lipopolysaccharide induced TNF factor	88.339							Nucleus	transcription regulator
LLPH	LLP homolog, long-term synaptic facilitation factor						-73.327		Extracellular Space	other
LMAN1L	lectin, mannose binding 1 like						-23.964		Plasma Membrane	other
LMBR1L	limb development membrane protein 1 like	138.74							Plasma Membrane	transmembrane receptor
LMBRD1	LMBR1 domain containing 1	470.788							Cytoplasm	enzyme
LMNA	lamin A/C	-388.428			302.436	294.452		179.986	Nucleus	other
LMTK2	lemur tyrosine kinase 2					-79.426			Cytoplasm	kinase
Lncpint	long non-protein coding RNA, Trp53 induced transcript	91.706							Other	other
LONP1	lon peptidase 1, mitochondrial	385.784	-424.399			-306.862			Cytoplasm	peptidase
LOX	lysyl oxidase	-1183.43							Extracellular Space	enzyme
LOXL3	lysyl oxidase like 3	-615.864							Extracellular Space	enzyme
LPAR1	lysophosphatidic acid receptor 1	-498.471			61.029	169.508			Plasma Membrane	G-protein coupled receptor
LPAR6	lysophosphatidic acid receptor 6	-59.137							Plasma Membrane	G-protein coupled receptor
LPCAT3	lysophosphatidylcholine acyltransferase 3				127.311				Plasma Membrane	enzyme
LPIN1	lipin 1	140.857							Nucleus	phosphatase
LRCH1	leucine rich repeats and calponin homology domain containing 1				-48.131				Cytoplasm	other
LRCH3	leucine rich repeats and calponin homology domain containing 3	117.202			-70.017				Cytoplasm	other
LRIF1	ligand dependent nuclear receptor interacting factor 1	95.727							Nucleus	other
LRIG1	leucine rich repeats and immunoglobulin like domains 1			91.015		75.451			Extracellular Space	other
LRIG3	leucine rich repeats and immunoglobulin like domains 3			-34.56					Extracellular Space	other
LRP6	LDL receptor related protein 6								Plasma Membrane	transmembrane receptor
LRP8	LDL receptor related protein 8	458.648			40.739				Plasma Membrane	transmembrane receptor
LRP11	LDL receptor related protein 11	-226.887						-140.306	Other	other
LRP12	LDL receptor related protein 12	92.19							Plasma Membrane	transmembrane receptor
LRPAP1	LDL receptor related protein associated protein 1	-212.617							Plasma Membrane	other
LRRC17	leucine rich repeat containing 17	-26.561							Extracellular Space	other
LRRC26	leucine rich repeat containing 26						19.716		Plasma Membrane	ion channel
LRRC45	leucine rich repeat containing 45	25.894							Cytoplasm	other
LRRC59	leucine rich repeat containing 59	-790.752							Cytoplasm	other
LRRC8D	leucine rich repeat containing 8 VRAC subunit D	194.222							Plasma Membrane	G-protein coupled receptor
LRRCC1	leucine rich repeat and coiled-coil centrosomal protein 1	-480.615							Nucleus	transporter
LRRFIP1	LRR binding FLII interacting protein 1	229.155						-73.181	Cytoplasm	transcription regulator
LRRK2	leucine rich repeat kinase 2	50.882							Cytoplasm	kinase	diagnosis
LRRN3	leucine rich repeat neuronal 3	-48.572							Extracellular Space	other
LSG1	large 60S subunit nuclear export GTPase 1	142.494							Cytoplasm	enzyme
LSM4	LSM4 homolog, U6 small nuclear RNA and mRNA degradation associated	-237.067							Nucleus	other
LSM6	LSM6 homolog, U6 small nuclear RNA and mRNA degradation associated	-231.465	102.062						Nucleus	other
LSM7	LSM7 homolog, U6 small nuclear RNA and mRNA degradation associated	-321.425				169.187			Nucleus	other
LSS	lanosterol synthase	2055.51							Cytoplasm	enzyme		oxiconazole
LTA4H	leukotriene A4 hydrolase	241.288		187.847				196.981	Cytoplasm	enzyme
LTO1	LTO1 maturation factor of ABCE1				61.762				Nucleus	other
LTV1	LTV1 ribosome biogenesis factor		-124.247						Other	other
LUC7L2	LUC7 like 2, pre-mRNA splicing factor	-187.464			-92.422				Nucleus	other
LUZP1	leucine zipper protein 1	-39.296							Nucleus	other
Luzp4 (includes others)	leucine zipper protein 4		79.49		88.26				Other	other
LXN	latexin	-200.664							Cytoplasm	other
LY96	lymphocyte antigen 96	214.054							Plasma Membrane	transmembrane receptor
LYAR	Ly1 antibody reactive	-435.817							Plasma Membrane	other
LYRM9	LYR motif containing 9							-29.611	Other	other
LYST	lysosomal trafficking regulator	95.446							Cytoplasm	transporter
LYZ	lysozyme			26.539					Extracellular Space	enzyme	unspecified application
LZTFL1	leucine zipper transcription factor like 1							39.369	Cytoplasm	other
LZTR1	leucine zipper like transcription regulator 1					-124.847			Cytoplasm	transcription regulator
LZTS2	leucine zipper tumor suppressor 2				28.131				Cytoplasm	other
M6PR	mannose-6-phosphate receptor, cation dependent						-45.347		Cytoplasm	transporter		alglucosidase alfa
MACROH2A2	macroH2A.2 histone	-227.34							Nucleus	other
MAD2L1	mitotic arrest deficient 2 like 1	-324.315							Nucleus	other
MAD2L1BP	MAD2L1 binding protein							21.092	Nucleus	other
MAFF	MAF bZIP transcription factor F	107.311							Nucleus	transcription regulator
MAFK	MAF bZIP transcription factor K	151.829					49.021		Nucleus	transcription regulator
MAGED2	MAGE family member D2	-180.947							Plasma Membrane	other
MAGI3	membrane associated guanylate kinase, WW and PDZ domain containing 3	-208.436							Cytoplasm	kinase
MAGOH	mago homolog, exon junction complex subunit	-359.626			-103.929				Nucleus	other
MAN1A1	mannosidase alpha class 1A member 1	329.249							Cytoplasm	enzyme
MAN1C1	mannosidase alpha class 1C member 1		29.966						Cytoplasm	enzyme
MAP1B	microtubule associated protein 1B	576.889							Cytoplasm	other
MAP1LC3B	microtubule associated protein 1 light chain 3 beta	834.094							Cytoplasm	other
MAP1S	microtubule associated protein 1S				72.741				Cytoplasm	enzyme
MAP3K2	mitogen-activated protein kinase kinase kinase 2						-56.485		Cytoplasm	kinase
Map3k7	mitogen-activated protein kinase kinase kinase 7							-147.055	Cytoplasm	kinase
MAP3K10	mitogen-activated protein kinase kinase kinase 10				46.556	61.627			Cytoplasm	kinase
MAP3K14	mitogen-activated protein kinase kinase kinase 14					77.095			Cytoplasm	kinase
MAP3K20	mitogen-activated protein kinase kinase kinase 20	-132.16							Cytoplasm	kinase
MAPK3	mitogen-activated protein kinase 3	722.716							Cytoplasm	kinase	efficacy	ASN007,ASTX029,HH2710,KO-947,LY3214996,ulixertinib,ZSET 1446
MAPK6	mitogen-activated protein kinase 6	488.151							Cytoplasm	kinase
MAPRE1	microtubule associated protein RP/EB family member 1		264.312						Cytoplasm	other
MARCHF6	membrane associated ring-CH-type finger 6					-46.265	49.05		Cytoplasm	enzyme
Marcks	myristoylated alanine rich protein kinase C substrate	-515.439			299.924				Plasma Membrane	other
MARS2	methionyl-tRNA synthetase 2, mitochondrial							-49.243	Cytoplasm	enzyme
MARVELD1	MARVEL domain containing 1	-328.579							Other	other
MARVELD3	MARVEL domain containing 3				69.496	111.678			Plasma Membrane	other
MAST4	microtubule associated serine/threonine kinase family member 4	130.615							Other	kinase
MASTL	microtubule associated serine/threonine kinase like	104.877							Cytoplasm	kinase
MAVS	mitochondrial antiviral signaling protein			-112.556					Cytoplasm	other
MAX	MYC associated factor X	114.432							Nucleus	transcription regulator
MAZ	MYC associated zinc finger protein	-115.914							Nucleus	transcription regulator
MBD3	methyl-CpG binding domain protein 3	-224.48				33.187			Nucleus	other
MBD5	methyl-CpG binding domain protein 5	-83.866			-99.604				Nucleus	other
MBTPS2	membrane bound transcription factor peptidase, site 2				-82.15				Cytoplasm	peptidase
MCC	MCC regulator of WNT signaling pathway	-136.883							Cytoplasm	other
MCM6	minichromosome maintenance complex component 6					-79.805			Nucleus	enzyme
MCM7	minichromosome maintenance complex component 7	329.666				202.273		157.766	Nucleus	enzyme	diagnosis,disease progression
MCOLN1	mucolipin 1	1005.2							Cytoplasm	ion channel	diagnosis
MCRIP2	MAPK regulated corepressor interacting protein 2				22.863	-56.415		-37.91	Cytoplasm	other
MDFIC	MyoD family inhibitor domain containing							-31.462	Nucleus	other
MDGA2	MAM domain containing glycosylphosphatidylinositol anchor 2					22.935			Plasma Membrane	other
ME1	malic enzyme 1	-130.572				-161.467			Cytoplasm	enzyme
MEA1	male-enhanced antigen 1			-120.739					Cytoplasm	other
MECOM	MDS1 and EVI1 complex locus	-217.205							Nucleus	transcription regulator	prognosis
MED6	mediator complex subunit 6					-106.305			Nucleus	transcription regulator
MED8	mediator complex subunit 8	-133.291							Nucleus	other
MED13	mediator complex subunit 13		-49.054						Nucleus	transcription regulator
MED14	mediator complex subunit 14	-365.069							Nucleus	transcription regulator
MED13L	mediator complex subunit 13L		-117.082		-158.214				Nucleus	other
MEDAG	mesenteric estrogen dependent adipogenesis	-917.21							Cytoplasm	other
MEF2A	myocyte enhancer factor 2A	294.365							Nucleus	transcription regulator
MEGF11	multiple EGF like domains 11		-22.492						Other	other
MEIS2	Meis homeobox 2	-105.093							Nucleus	transcription regulator
MESD	mesoderm development LRP chaperone	-122.141							Extracellular Space	other
METAP2	methionyl aminopeptidase 2	-347.501							Cytoplasm	peptidase	unspecified application	beloranib,M8891,nitroxoline,O-(chloroacetylcarbamoyl)fumagillol,PPI-2458,SDX-7320,XMT-1107
METAP1D	methionyl aminopeptidase type 1D, mitochondrial							-36.16	Cytoplasm	peptidase
METRN	meteorin, glial cell differentiation regulator	-137.095							Extracellular Space	other
METTL6	methyltransferase like 6		-41.237						Other	enzyme
METTL15	methyltransferase like 15							-21.231	Other	other
METTL16	methyltransferase like 16	-197.231							Nucleus	enzyme
METTL18	methyltransferase like 18	26.617					25.216		Other	other
METTL23	methyltransferase like 23					339.752			Cytoplasm	other
METTL24	methyltransferase like 24					28.895			Other	other
METTL27	methyltransferase like 27	102.75							Other	enzyme
METTL7A	methyltransferase like 7A		45.96						Cytoplasm	other
MFGE8	milk fat globule EGF and factor V/VIII domain containing	1060.84							Extracellular Space	other
MFN1	mitofusin 1				-47.542				Cytoplasm	enzyme
MFSD1	major facilitator superfamily domain containing 1	1414.79	105.263						Other	transporter
MFSD5	major facilitator superfamily domain containing 5						-45.657		Other	transporter
MGMT	O-6-methylguanine-DNA methyltransferase					95.249			Nucleus	enzyme	diagnosis,efficacy,prognosis	O6-alkylguanine-DNA alkyltransferase inhibitor,O6-benzylguanine
MGST2	microsomal glutathione S-transferase 2	-106.881		-94.752					Cytoplasm	enzyme
MGST3	microsomal glutathione S-transferase 3					32.718			Cytoplasm	enzyme
MICAL1	microtubule associated monooxygenase, calponin and LIM domain containing 1		23.363					25.007	Cytoplasm	enzyme
MINDY1	MINDY lysine 48 deubiquitinase 1	53.152							Cytoplasm	peptidase
MINDY2	MINDY lysine 48 deubiquitinase 2	121.214							Nucleus	transporter
MKI67	marker of proliferation Ki-67	-586.178							Nucleus	other	diagnosis,disease progression,efficacy,prognosis,response to therapy,unspecified application
MKRN1	makorin ring finger protein 1	62.741	-31.792			-39.395	-41.607		Cytoplasm	enzyme
MKS1	MKS transition zone complex subunit 1				-57.912				Cytoplasm	other
MLF2	myeloid leukemia factor 2	-181.402							Nucleus	other
MLLT1	MLLT1 super elongation complex subunit	-24.478							Nucleus	transcription regulator
MLX	MAX dimerization protein MLX	37.645						-50.953	Nucleus	transcription regulator
MLYCD	malonyl-CoA decarboxylase	39.225		32.804					Cytoplasm	enzyme
MMAA	metabolism of cobalamin associated A			35.861					Cytoplasm	enzyme
MMP2	matrix metallopeptidase 2	1175.77							Extracellular Space	peptidase	diagnosis,disease progression,efficacy,prognosis,response to therapy,unspecified application	marimastat,MMP2 MMP9 inhibitor,prinomastat,rebimastat
MMP11	matrix metallopeptidase 11					-95.326			Extracellular Space	peptidase	diagnosis,disease progression,unspecified application	marimastat
MMS19	MMS19 homolog, cytosolic iron-sulfur assembly component					64.648			Nucleus	transcription regulator
MMS22L	MMS22 like, DNA repair protein						49.736		Nucleus	other
MNAT1	MNAT1 component of CDK activating kinase	-37.817							Nucleus	other
MNT	MAX network transcriptional repressor	87.599							Nucleus	transcription regulator
MOB3A	MOB kinase activator 3A			35.846	40.557				Other	other
MOB3B	MOB kinase activator 3B	-21.645							Other	other
MORF4L1	mortality factor 4 like 1							-86.7	Nucleus	other
MORF4L2	mortality factor 4 like 2		-668.257						Nucleus	other
MORN2	MORN repeat containing 2	-45.462							Other	other
MOSMO	modulator of smoothened							-49.494	Other	other
MOSPD1	motile sperm domain containing 1	331.816							Other	other
MOSPD3	motile sperm domain containing 3					46.121			Other	other
MOV10	Mov10 RISC complex RNA helicase	-317.601							Nucleus	enzyme
MPHOSPH6	M-phase phosphoprotein 6	-284.466							Nucleus	other
MPLKIP	M-phase specific PLK1 interacting protein	-115.498							Nucleus	other
MPPED1	metallophosphoesterase domain containing 1				55.062		-52.236		Other	other
MPV17	mitochondrial inner membrane protein MPV17	492.6							Cytoplasm	ion channel
MPV17L	MPV17 mitochondrial inner membrane protein like						-21.874		Cytoplasm	other
MPZL1	myelin protein zero like 1	28.473						-51.395	Plasma Membrane	other
MRC2	mannose receptor C type 2	-206.798							Plasma Membrane	transmembrane receptor
MREG	melanoregulin							-49.513	Cytoplasm	other
MRGBP	MRG domain binding protein	116.078							Nucleus	other
MRI1	methylthioribose-1-phosphate isomerase 1							-38.738	Cytoplasm	translation regulator
MROH1	maestro heat like repeat family member 1	273.978							Other	other
MRPL9	mitochondrial ribosomal protein L9	-36.58				60.208			Cytoplasm	translation regulator	unspecified application
MRPL10	mitochondrial ribosomal protein L10	-192.489							Cytoplasm	other
MRPL13	mitochondrial ribosomal protein L13		-83.891						Cytoplasm	other
MRPL18	mitochondrial ribosomal protein L18	-220.361							Cytoplasm	translation regulator
MRPL27	mitochondrial ribosomal protein L27		57.161						Cytoplasm	other
MRPL30	mitochondrial ribosomal protein L30	-272.916							Cytoplasm	other
MRPL34	mitochondrial ribosomal protein L34	-34.854					-54.943		Cytoplasm	other
MRPL37	mitochondrial ribosomal protein L37					164.428			Cytoplasm	enzyme
MRPL41	mitochondrial ribosomal protein L41	-57.057							Cytoplasm	other
MRPL52	mitochondrial ribosomal protein L52		99.443						Cytoplasm	other
MRPL54	mitochondrial ribosomal protein L54						101.637		Cytoplasm	other
MRPL58	mitochondrial ribosomal protein L58	-127.975			109.518				Cytoplasm	enzyme
MRPS14	mitochondrial ribosomal protein S14	-309.04						-199.694	Cytoplasm	other
MRPS17	mitochondrial ribosomal protein S17					39.43			Cytoplasm	other
MRPS28	mitochondrial ribosomal protein S28	-194.813							Cytoplasm	other
MRPS34	mitochondrial ribosomal protein S34	-55.855							Cytoplasm	other
MRPS35	mitochondrial ribosomal protein S35	-46.509					-50.812	-29.487	Cytoplasm	other
MRPS18B	mitochondrial ribosomal protein S18B						-90.124	-110.384	Cytoplasm	other
MRPS18C	mitochondrial ribosomal protein S18C	-26.145							Cytoplasm	other
MRS2	magnesium transporter MRS2		-30.987						Cytoplasm	transporter
MRTFB	myocardin related transcription factor B							154.35	Nucleus	transcription regulator
MSI2	musashi RNA binding protein 2	-171.95	-53.504			-69.001			Cytoplasm	other
MSMO1	methylsterol monooxygenase 1					112.5			Cytoplasm	enzyme
MSN	moesin	376.946							Plasma Membrane	other
MSRA	methionine sulfoxide reductase A			-41.527					Cytoplasm	enzyme
MSRB1	methionine sulfoxide reductase B1	85.631						101.76	Nucleus	enzyme
MSX2	msh homeobox 2		29.751						Nucleus	transcription regulator
Mt1	metallothionein 1	2212.35							Cytoplasm	other
Mt2	metallothionein 2	1565.84							Cytoplasm	other
MT-ND6	NADH dehydrogenase, subunit 6 (complex I)	-342.311		-494.089	-442.549			-473.722	Cytoplasm	enzyme
MTA3	metastasis associated 1 family member 3			-161.224					Nucleus	transcription regulator
MTAP	methylthioadenosine phosphorylase	-1279.77	338.646		314.279			400.297	Nucleus	enzyme	efficacy,prognosis,safety
MTARC2	mitochondrial amidoxime reducing component 2	-82.391							Cytoplasm	enzyme
MTBP	MDM2 binding protein	244.577							Cytoplasm	other
MTDH	metadherin	351.289				-124.188			Cytoplasm	transcription regulator	prognosis
MTERF3	mitochondrial transcription termination factor 3				-149.136				Cytoplasm	other
MTF2	metal response element binding transcription factor 2	105.588							Nucleus	transcription regulator
MTFR1L	mitochondrial fission regulator 1 like		-63.734						Other	other
MTHFD1L	methylenetetrahydrofolate dehydrogenase (NADP+ dependent) 1 like	88.432							Cytoplasm	enzyme
MTHFD2L	methylenetetrahydrofolate dehydrogenase (NADP+ dependent) 2 like	-85.269							Cytoplasm	enzyme
MTHFR	methylenetetrahydrofolate reductase	141.074							Cytoplasm	enzyme	diagnosis,efficacy,response to therapy,safety
MTHFS	methenyltetrahydrofolate synthetase					-43.025			Cytoplasm	enzyme
MTMR14	myotubularin related protein 14	-31.209	35.389			25.663			Cytoplasm	phosphatase
MTR	5-methyltetrahydrofolate-homocysteine methyltransferase	-97.658							Cytoplasm	enzyme		cyanocobalamin,hydroxocobalamin,mecobalamin
MTRES1	mitochondrial transcription rescue factor 1							-22.382	Cytoplasm	other
MTX3	metaxin 3					-30.606		-19.04	Other	other
Muc3	mucin 3, intestinal					23.165			Plasma Membrane	other
MUC20	mucin 20, cell surface associated			26.084	20.367				Plasma Membrane	other
MVD	mevalonate diphosphate decarboxylase	800.565	120.327						Cytoplasm	enzyme
MXD1	MAX dimerization protein 1			-26.777					Nucleus	transcription regulator
MXRA8	matrix remodeling associated 8					67.626			Cytoplasm	other
MYADM	myeloid associated differentiation marker	635.873				238.601			Nucleus	other
MYBBP1A	MYB binding protein 1a						-109.761		Nucleus	transcription regulator	unspecified application
MYBL1	MYB proto-oncogene like 1		-77.947				-53.722		Nucleus	transcription regulator
MYBL2	MYB proto-oncogene like 2						29.455		Nucleus	transcription regulator
MYCBP	MYC binding protein	-327.46							Nucleus	transcription regulator
MYH10	myosin heavy chain 10					-120.621			Cytoplasm	enzyme	unspecified application
MYL6	myosin light chain 6	-444.004		-250.165					Cytoplasm	enzyme
MYL6B	myosin light chain 6B			-19.227					Cytoplasm	other
MYLIP	myosin regulatory light chain interacting protein	-212.75							Cytoplasm	enzyme
MYO10	myosin X			74.618					Cytoplasm	enzyme
MYO19	myosin XIX							81.565	Cytoplasm	enzyme
MYO1F	myosin IF				-26.792				Cytoplasm	other
MYO9B	myosin IXB				56.067			49.799	Cytoplasm	enzyme
MZT1	mitotic spindle organizing protein 1	-163.065			-104.165				Cytoplasm	other
N6AMT1	N-6 adenine-specific DNA methyltransferase 1				24.925				Cytoplasm	enzyme
NAA38	N-alpha-acetyltransferase 38, NatC auxiliary subunit	-402.913							Nucleus	other
NAA40	N-alpha-acetyltransferase 40, NatD catalytic subunit							-22.8	Other	enzyme
NAB2	NGFI-A binding protein 2	-265.11							Nucleus	transcription regulator
NABP1	nucleic acid binding protein 1	320.38							Nucleus	other
NABP2	nucleic acid binding protein 2					103.075			Nucleus	other
NAE1	NEDD8 activating enzyme E1 subunit 1							-97.869	Cytoplasm	enzyme
NAGA	alpha-N-acetylgalactosaminidase	216.888							Cytoplasm	enzyme
NAGLU	N-acetyl-alpha-glucosaminidase	236.35							Cytoplasm	enzyme	unspecified application
Naip1 (includes others)	NLR family, apoptosis inhibitory protein 1							19.867	Cytoplasm	other
NAMPT	nicotinamide phosphoribosyltransferase	161.571							Extracellular Space	cytokine	diagnosis,prognosis	daporinad,KPT-9274
NANS	N-acetylneuraminate synthase	-141.268		-162.88					Cytoplasm	enzyme
NAT8B	N-acetyltransferase 8B (putative, gene/pseudogene)						34.864		Cytoplasm	enzyme
Nbdy	negative regulator of P-body association	-187.871							Other	other
NBEA	neurobeachin	-28.206							Cytoplasm	other
NBR1	NBR1 autophagy cargo receptor	423.276							Cytoplasm	other
NCAPH2	non-SMC condensin II complex subunit H2			35.331				40.845	Nucleus	other
NCBP3	nuclear cap binding subunit 3	-76.182							Nucleus	other
NCBP2AS2	NCBP2 antisense 2 (head to head)					48.697			Other	other
NCLN	nicalin				133.511				Cytoplasm	peptidase
NDFIP1	Nedd4 family interacting protein 1	218.636							Cytoplasm	other
NDFIP2	Nedd4 family interacting protein 2	110.485							Cytoplasm	other
NDRG1	N-myc downstream regulated 1	1897.69							Nucleus	kinase
NDRG3	NDRG family member 3	-117.896							Cytoplasm	other
NDST1	N-deacetylase and N-sulfotransferase 1			51.006	68.683				Cytoplasm	enzyme
NDUFA6	NADH:ubiquinone oxidoreductase subunit A6				-156.159				Cytoplasm	enzyme
NDUFA8	NADH:ubiquinone oxidoreductase subunit A8	-383.239							Cytoplasm	enzyme
NDUFA10	NADH:ubiquinone oxidoreductase subunit A10	-264.772							Cytoplasm	transporter
NDUFAB1	NADH:ubiquinone oxidoreductase subunit AB1	-161.668							Cytoplasm	enzyme
NDUFAF6	NADH:ubiquinone oxidoreductase complex assembly factor 6	-56.826		-29.944				-23.036	Cytoplasm	other
NDUFB3	NADH:ubiquinone oxidoreductase subunit B3	-39.544							Cytoplasm	enzyme
NDUFB4	NADH:ubiquinone oxidoreductase subunit B4	-409.958							Cytoplasm	transporter
NDUFB6	NADH:ubiquinone oxidoreductase subunit B6	-369.502		-206.342					Cytoplasm	enzyme
NDUFS1	NADH:ubiquinone oxidoreductase core subunit S1	-157.952							Cytoplasm	enzyme
NDUFS2	NADH:ubiquinone oxidoreductase core subunit S2					77.589			Cytoplasm	enzyme
Ndufs5	NADH:ubiquinone oxidoreductase core subunit S5	-280.069							Cytoplasm	other
NDUFV2	NADH:ubiquinone oxidoreductase core subunit V2	-391.611							Cytoplasm	enzyme
NECAB3	N-terminal EF-hand calcium binding protein 3						30.69		Cytoplasm	other
NECAP1	NECAP endocytosis associated 1					36.063			Plasma Membrane	other
NECTIN2	nectin cell adhesion molecule 2						-28.903		Plasma Membrane	transmembrane receptor
NEDD9	neural precursor cell expressed, developmentally down-regulated 9	-145.689							Nucleus	other
NEDD4L	NEDD4 like E3 ubiquitin protein ligase	502.54							Cytoplasm	enzyme
NEIL2	nei like DNA glycosylase 2					35.408			Nucleus	enzyme
NEIL3	nei like DNA glycosylase 3	-104.2							Nucleus	enzyme
NEK6	NIMA related kinase 6	-236.304							Nucleus	kinase
NEK7	NIMA related kinase 7							-48.723	Nucleus	kinase
NELFA	negative elongation factor complex member A	-103.646							Nucleus	other
NELFCD	negative elongation factor complex member C/D				33.821				Nucleus	other
NEXN	nexilin F-actin binding protein	-42.123							Plasma Membrane	other
NFASC	neurofascin							24.505	Plasma Membrane	other
NFE2L1	nuclear factor, erythroid 2 like 1	792.455							Nucleus	transcription regulator
NFE2L3	nuclear factor, erythroid 2 like 3					20.577		31.938	Nucleus	transcription regulator
NFIC	nuclear factor I C	-174.148		97.956					Nucleus	transcription regulator
NFKB2	nuclear factor kappa B subunit 2	103.076			81.511	52.512	55.405		Nucleus	transcription regulator
NFKBIB	NFKB inhibitor beta	292.109							Nucleus	transcription regulator
NFYA	nuclear transcription factor Y subunit alpha	-63.567					27.078		Nucleus	transcription regulator
NFYC	nuclear transcription factor Y subunit gamma	-367.92							Nucleus	transcription regulator
NGDN	neuroguidin	70.04							Nucleus	other
NGRN	neugrin, neurite outgrowth associated	28.009							Nucleus	other
NIPSNAP2	nipsnap homolog 2	-205.056							Plasma Membrane	other
NIPSNAP3A	nipsnap homolog 3A							-23.73	Nucleus	other
NIT2	nitrilase family member 2	-78.587		-44.975					Cytoplasm	enzyme
NKD1	NKD inhibitor of WNT signaling pathway 1					37.175			Other	other
NLN	neurolysin					55.67			Cytoplasm	peptidase
NME1	NME/NM23 nucleoside diphosphate kinase 1	-662.434							Cytoplasm	kinase	unspecified application
NME2	NME/NM23 nucleoside diphosphate kinase 2			-703.355					Nucleus	kinase
NME7	NME/NM23 family member 7	-63.324			-22.543				Cytoplasm	kinase
NMI	N-myc and STAT interactor	-42.311	67.596						Cytoplasm	transcription regulator
NNMT	nicotinamide N-methyltransferase	191.458							Cytoplasm	enzyme	unspecified application	atorvastatin/niacin,lovastatin/niacin,nicotinic acid,nicotinic acid/pioglitazone
NOC4L	nucleolar complex associated 4 homolog	-116.729					-51.376		Nucleus	other
NOL4	nucleolar protein 4				-26.026				Nucleus	other
NOL10	nucleolar protein 10	-81.518							Nucleus	other
NOL11	nucleolar protein 11	-261.51							Nucleus	other
NOL12	nucleolar protein 12	-77.541							Nucleus	other
NOL4L	nucleolar protein 4 like	21.645				45.5			Other	other
NOM1	nucleolar protein with MIF4G domain 1		74.934						Nucleus	other
NOP2	NOP2 nucleolar protein	102.458			118.754				Nucleus	other
NOP16	NOP16 nucleolar protein	-187.158							Nucleus	other
NOP53	NOP53 ribosome biogenesis factor	260.743							Cytoplasm	other
NOP58	NOP58 ribonucleoprotein	-246.277					-139.472		Nucleus	enzyme
Norad	non-coding RNA activated by DNA damage	-97.171							Other	other
NOSTRIN	nitric oxide synthase trafficking						19.435		Cytoplasm	transcription regulator
NOTCH2	notch receptor 2			85.91					Plasma Membrane	transcription regulator	unspecified application
NOXO1	NADPH oxidase organizer 1	88.028							Plasma Membrane	other		ecabet
NPDC1	neural proliferation, differentiation and control 1			-32.726					Extracellular Space	other
NPEPPS	aminopeptidase puromycin sensitive				77.824			94.154	Cytoplasm	peptidase	unspecified application
NPLOC4	NPL4 homolog, ubiquitin recognition factor	-229.237			239.329				Nucleus	other
NPR3	natriuretic peptide receptor 3	-465.005					-328.517		Plasma Membrane	G-protein coupled receptor		nesiritide
NPW	neuropeptide W	31.536							Extracellular Space	other
NQO1	NAD(P)H quinone dehydrogenase 1					53.687			Cytoplasm	enzyme	diagnosis,unspecified application
NR1D1	nuclear receptor subfamily 1 group D member 1		-40.734		-63.131				Nucleus	ligand-dependent nuclear receptor
NR2C1	nuclear receptor subfamily 2 group C member 1				-24.969			-49.242	Nucleus	transcription regulator
NR2F2	nuclear receptor subfamily 2 group F member 2	-1211.38							Nucleus	ligand-dependent nuclear receptor
NRBF2	nuclear receptor binding factor 2	29.216							Nucleus	transcription regulator
NRF1	nuclear respiratory factor 1				55.885				Nucleus	transcription regulator
Nrg1	neuregulin 1					120.727			Plasma Membrane	other
NRIP3	nuclear receptor interacting protein 3	-39.741							Other	other
NRP1	neuropilin 1	-205.882						267.168	Plasma Membrane	transmembrane receptor	diagnosis,efficacy	vesencumab
NSDHL	NAD(P) dependent steroid dehydrogenase-like	2520.39							Cytoplasm	enzyme
NSUN2	NOP2/Sun RNA methyltransferase 2		20.688						Nucleus	enzyme
NSUN3	NOP2/Sun RNA methyltransferase 3	-57.093							Cytoplasm	enzyme
NSUN4	NOP2/Sun RNA methyltransferase 4	86.237							Cytoplasm	enzyme
NT5C2	5'-nucleotidase, cytosolic II							48.526	Cytoplasm	phosphatase
NT5DC2	5'-nucleotidase domain containing 2	-455.112							Cytoplasm	other
NTRK3	neurotrophic receptor tyrosine kinase 3				-21.872	-23.457			Plasma Membrane	kinase	unspecified application	belizatinib,bevacizumab/entrectinib,DS-6051b,entrectinib,larotrectinib,lorlatinib,LOXO-195,NOV1601,ONO-7579,PLX7486,pralsetinib,repotrectinib
NUAK2	NUAK family kinase 2	-29.115							Nucleus	kinase
NUB1	negative regulator of ubiquitin like proteins 1					60.316			Nucleus	other
NUDC	nuclear distribution C, dynein complex regulator					85.816			Cytoplasm	other
NUDCD1	NudC domain containing 1	-31.872				-72.073			Nucleus	other
NUDCD2	NudC domain containing 2							-149.58	Cytoplasm	other
NUDT2	nudix hydrolase 2	-55.596							Plasma Membrane	phosphatase
NUDT17	nudix hydrolase 17			28.002					Cytoplasm	other
NUDT21	nudix hydrolase 21				-182.599				Nucleus	other
NUDT22	nudix hydrolase 22			-27.207					Nucleus	enzyme
NUF2	NUF2 component of NDC80 kinetochore complex	-239.737							Nucleus	other
NUP42	nucleoporin 42						22.187	23.817	Nucleus	transporter
NUP85	nucleoporin 85				84.935				Cytoplasm	other
NUP107	nucleoporin 107				96.239				Nucleus	other
NUP155	nucleoporin 155							36.955	Nucleus	other
NUPR1	nuclear protein 1, transcriptional regulator		-130.54						Nucleus	transcription regulator
NUTF2	nuclear transport factor 2	-723.062							Nucleus	other
NXF3	nuclear RNA export factor 3	218.576							Nucleus	transporter
NXN	nucleoredoxin	-94.489							Nucleus	enzyme
NXT2	nuclear transport factor 2 like export factor 2	-307.877			-169.324	-199.713		-177.188	Nucleus	transporter
OBI1	ORC ubiquitin ligase 1			-69.479		-76.631			Nucleus	enzyme
Obsl1	obscurin-like 1	-41.898							Other	other
ODC1	ornithine decarboxylase 1	-577.149							Cytoplasm	enzyme	efficacy	eflornithine,tazarotene
OGDH	oxoglutarate dehydrogenase			220.486			315.972		Cytoplasm	enzyme
OGN	osteoglycin	-494.024							Extracellular Space	growth factor
OGT	O-linked N-acetylglucosamine (GlcNAc) transferase			153.561					Cytoplasm	enzyme
OIT3	oncoprotein induced transcript 3	22.575							Nucleus	other
OLFML3	olfactomedin like 3	-145.861							Extracellular Space	other
OLFML2B	olfactomedin like 2B	-42.418							Extracellular Space	other
Olfr1024	olfactory receptor 1024			-19.038					Plasma Membrane	G-protein coupled receptor
Olfr566 (includes others)	olfactory receptor 566		22.623						Plasma Membrane	G-protein coupled receptor
OPCML	opioid binding protein/cell adhesion molecule like							28.67	Plasma Membrane	other	diagnosis
OR13J1	olfactory receptor family 13 subfamily J member 1					-26.801			Plasma Membrane	G-protein coupled receptor
OR4D1	olfactory receptor family 4 subfamily D member 1			21.039					Plasma Membrane	G-protein coupled receptor
ORC1	origin recognition complex subunit 1	108.632							Nucleus	other
ORC6	origin recognition complex subunit 6	-81.101					-32.515		Nucleus	other
OSBPL2	oxysterol binding protein like 2	210.892							Cytoplasm	transporter
OSBPL3	oxysterol binding protein like 3	36.293							Cytoplasm	other
OSBPL9	oxysterol binding protein like 9		188.243						Cytoplasm	other
OSGEP	O-sialoglycoprotein endopeptidase				-89.783				Nucleus	peptidase
OSGEPL1	O-sialoglycoprotein endopeptidase like 1	-57.976							Cytoplasm	peptidase
OSR1	odd-skipped related transcription factor 1	-1155.38							Nucleus	transcription regulator
OSTC	oligosaccharyltransferase complex non-catalytic subunit	-182.83							Cytoplasm	enzyme
OSTM1	osteoclastogenesis associated transmembrane protein 1	556.714			-82.021				Cytoplasm	other
OTOF	otoferlin					45.205			Plasma Membrane	other
OTUB2	OTU deubiquitinase, ubiquitin aldehyde binding 2	135.906		-46.413					Nucleus	enzyme
OTUD4	OTU deubiquitinase 4					-74.333			Cytoplasm	peptidase
OTUD7B	OTU deubiquitinase 7B		-57.784						Cytoplasm	peptidase
OXSR1	oxidative stress responsive kinase 1	96.204							Nucleus	kinase
P2RX4	purinergic receptor P2X 4	351.839						-48.662	Plasma Membrane	ion channel
P4HA1	prolyl 4-hydroxylase subunit alpha 1	-442.338							Cytoplasm	enzyme	unspecified application
P4HA3	prolyl 4-hydroxylase subunit alpha 3	-142.527							Cytoplasm	enzyme
PACS2	phosphofurin acidic cluster sorting protein 2		-157.438						Cytoplasm	other
PACSIN2	protein kinase C and casein kinase substrate in neurons 2							232.844	Cytoplasm	transporter
PACSIN3	protein kinase C and casein kinase substrate in neurons 3	122.512							Cytoplasm	other
PAFAH2	platelet activating factor acetylhydrolase 2					27.54			Cytoplasm	enzyme
PAK1	p21 (RAC1) activated kinase 1	-130.301						80.09	Cytoplasm	kinase		K-252
PAK2	p21 (RAC1) activated kinase 2	-108.024							Cytoplasm	kinase
Pakap	paralemmin A kinase anchor protein	744.771			72.982		-78.17		Other	other
PAPOLA	poly(A) polymerase alpha				-225.448				Nucleus	enzyme
PAPOLG	poly(A) polymerase gamma				-29.419				Nucleus	enzyme
PARD6B	par-6 family cell polarity regulator beta		-43.817						Plasma Membrane	other
PARD6G	par-6 family cell polarity regulator gamma	-78.063							Plasma Membrane	other
PARK7	Parkinsonism associated deglycase	-153.225							Nucleus	enzyme	diagnosis
PARP1	poly(ADP-ribose) polymerase 1	-115.741							Nucleus	enzyme	diagnosis,efficacy,prognosis	2X-121,[18F]fluorthanatrace,ABT-767,bevacizumab/olaparib,CEP-9722,fluzoparib,IDX-1197,niraparib,olaparib,poly ADP ribose polymerase 1 inhibitor,rucaparib,SC10914,senaparib,simmiparib,talazoparib,veliparib
PARP4	poly(ADP-ribose) polymerase family member 4				44.495				Cytoplasm	enzyme
PARVB	parvin beta	385.04							Cytoplasm	other
PATZ1	POZ/BTB and AT hook containing zinc finger 1		22.669						Nucleus	transcription regulator
PAWR	pro-apoptotic WT1 regulator	38.643							Nucleus	transcription regulator	prognosis
PBK	PDZ binding kinase	-147.688							Cytoplasm	kinase
PBX2	PBX homeobox 2	-52.81							Nucleus	transcription regulator
PBX3	PBX homeobox 3				-48.523				Nucleus	transcription regulator
PCDH18	protocadherin 18	-315.663							Extracellular Space	other
PCDHGA12	protocadherin gamma subfamily A, 12	98.381							Plasma Membrane	other
PCGF2	polycomb group ring finger 2					93.238			Nucleus	transcription regulator	prognosis
PCGF3	polycomb group ring finger 3	-70.734							Nucleus	other
PCK2	phosphoenolpyruvate carboxykinase 2, mitochondrial	220.28	-192.449					-207.692	Cytoplasm	kinase
PCLAF	PCNA clamp associated factor	-476.524				-228.25			Nucleus	other
Pcnt	pericentrin (kendrin)							33.547	Cytoplasm	other
PCNX3	pecanex 3					75.54			Other	other
PCOLCE	procollagen C-endopeptidase enhancer	-801.85							Extracellular Space	other
PCP2	Purkinje cell protein 2				-77.582		-71.605		Cytoplasm	other
PCSK1N	proprotein convertase subtilisin/kexin type 1 inhibitor			-17.956					Extracellular Space	other
PCYT2	phosphate cytidylyltransferase 2, ethanolamine	559.388		62.97					Cytoplasm	enzyme
PDAP1	PDGFA associated protein 1	-286.82							Cytoplasm	other
PDCD10	programmed cell death 10				56.986	-42.207			Cytoplasm	other
PDCD2L	programmed cell death 2 like							-30.166	Other	other
PDCL3	phosducin like 3	-73.881							Cytoplasm	other
PDE4B	phosphodiesterase 4B	-143.428							Cytoplasm	enzyme		anagrelide,apremilast,arofylline,caffeine,caffeine/ergotamine,cilomilast,dipyridamole,dyphylline,enprofylline,ibudilast,ketotifen,L 869298,L-826,141,milrinone,papaverine,pentoxifylline,roflumilast,tetomilast,theophylline,tolbutamide
PDE4C	phosphodiesterase 4C	44.859							Cytoplasm	enzyme		anagrelide,arofylline,caffeine,caffeine/ergotamine,cilomilast,dipyridamole,dyphylline,ibudilast,ketotifen,L 869298,L-826,141,milrinone,pentoxifylline,roflumilast,tetomilast,theophylline,tolbutamide
PDE4DIP	phosphodiesterase 4D interacting protein	428.675							Cytoplasm	enzyme	unspecified application
PDGFC	platelet derived growth factor C	-245.984							Extracellular Space	growth factor
PDHB	pyruvate dehydrogenase E1 subunit beta			-122.11					Cytoplasm	enzyme	unspecified application
PDIA3	protein disulfide isomerase family A member 3	-549.245							Cytoplasm	peptidase	diagnosis
PDIA4	protein disulfide isomerase family A member 4						-123.908		Cytoplasm	enzyme
PDIA5	protein disulfide isomerase family A member 5	-95.62							Cytoplasm	enzyme
PDIA6	protein disulfide isomerase family A member 6	-877.173							Cytoplasm	enzyme
PDLIM1	PDZ and LIM domain 1	229.824							Cytoplasm	transcription regulator	unspecified application
PDP2	pyruvate dehyrogenase phosphatase catalytic subunit 2	94.014			20.23				Cytoplasm	phosphatase
PDPK1	3-phosphoinositide dependent protein kinase 1			-18.735					Cytoplasm	kinase
PDSS2	decaprenyl diphosphate synthase subunit 2	-33.078							Cytoplasm	enzyme
PDXK	pyridoxal kinase	-205.849			94.779				Cytoplasm	kinase
PDZD8	PDZ domain containing 8	267.24	-134.45		-94.696				Extracellular Space	other
PDZK1IP1	PDZK1 interacting protein 1	22.934							Extracellular Space	other
PDZRN3	PDZ domain containing ring finger 3	-54.806							Extracellular Space	enzyme
PEAR1	platelet endothelial aggregation receptor 1	102.204							Plasma Membrane	other
PEG3	paternally expressed 3	44.472							Nucleus	kinase	diagnosis
PELI2	pellino E3 ubiquitin protein ligase family member 2	86.144							Cytoplasm	enzyme
PEMT	phosphatidylethanolamine N-methyltransferase	-19.564							Cytoplasm	enzyme	diagnosis
PER3	period circadian regulator 3	-146.371							Nucleus	other
PEX6	peroxisomal biogenesis factor 6		22.688						Cytoplasm	enzyme
PEX13	peroxisomal biogenesis factor 13	-37.566							Cytoplasm	transporter
PFDN1	prefoldin subunit 1					239.871			Cytoplasm	other
PFDN4	prefoldin subunit 4		-95.542	-65.473				-125.767	Cytoplasm	other
PFKP	phosphofructokinase, platelet	285.867							Cytoplasm	kinase
PGAM1	phosphoglycerate mutase 1	-401.036			375.182				Cytoplasm	phosphatase
PGD	phosphogluconate dehydrogenase				196.875	229.813			Cytoplasm	enzyme
PGGHG	protein-glucosylgalactosylhydroxylysine glucosidase	28.865							Cytoplasm	enzyme
PGK1	phosphoglycerate kinase 1	469.38							Cytoplasm	kinase
PGP	phosphoglycolate phosphatase					131.536			Cytoplasm	enzyme
PGRMC1	progesterone receptor membrane component 1	-122.851							Plasma Membrane	transmembrane receptor		CT1812
PHB2	prohibitin 2	-402.569					-106.033	-187.537	Cytoplasm	transcription regulator
PHF1	PHD finger protein 1		29.606						Nucleus	transcription regulator
PHF10	PHD finger protein 10	346.764							Nucleus	other
PHF11	PHD finger protein 11	-34.554							Nucleus	other
PHF12	PHD finger protein 12						70.365		Nucleus	transcription regulator
PHF14	PHD finger protein 14			-24.312	-46.125				Nucleus	other
PHKG2	phosphorylase kinase catalytic subunit gamma 2	79.13							Cytoplasm	kinase
PHLDB2	pleckstrin homology like domain family B member 2							-72.277	Cytoplasm	other
PHLDB3	pleckstrin homology like domain family B member 3					27.971			Other	other
PHPT1	phosphohistidine phosphatase 1	-126.818							Cytoplasm	phosphatase
PICALM	phosphatidylinositol binding clathrin assembly protein				-152.652				Cytoplasm	other
PIEZO1	piezo type mechanosensitive ion channel component 1	135.428							Cytoplasm	ion channel
PIGO	phosphatidylinositol glycan anchor biosynthesis class O			-35.173			-20.505		Cytoplasm	enzyme
PIGW	phosphatidylinositol glycan anchor biosynthesis class W					-57.523	-75.302		Cytoplasm	enzyme
PIK3C2B	phosphatidylinositol-4-phosphate 3-kinase catalytic subunit type 2 beta	-52.627	-26.752					-23.342	Cytoplasm	kinase
PIK3R1	phosphoinositide-3-kinase regulatory subunit 1	-99.022							Cytoplasm	kinase
PIK3R2	phosphoinositide-3-kinase regulatory subunit 2	-123.106							Cytoplasm	kinase
PIKFYVE	phosphoinositide kinase, FYVE-type zinc finger containing	142.662							Cytoplasm	kinase		apilimod
PIM1	Pim-1 proto-oncogene, serine/threonine kinase	329.224							Cytoplasm	kinase	disease progression,prognosis	AZD-1208,LGH447,PIM/FLT3 kinase inhibitor SEL24,SGI 1776
PIMREG	PICALM interacting mitotic regulator						63.887		Nucleus	other
PIN1	peptidylprolyl cis/trans isomerase, NIMA-interacting 1			-84.283					Nucleus	enzyme
PIP4P1	phosphatidylinositol-4,5-bisphosphate 4-phosphatase 1	583.452							Cytoplasm	phosphatase
PIP4P2	phosphatidylinositol-4,5-bisphosphate 4-phosphatase 2	-79.333							Cytoplasm	phosphatase
PIP5K1B	phosphatidylinositol-4-phosphate 5-kinase type 1 beta				28.271	26.197			Cytoplasm	kinase
PIR	pirin			-240.517					Nucleus	transcription regulator
Pisd-ps3	phosphatidylserine decarboxylase, pseudogene 3	-487.342							Other	other
PJA2	praja ring finger ubiquitin ligase 2	-182.771							Cytoplasm	enzyme
PKD2	polycystin 2, transient receptor potential cation channel	346.497							Plasma Membrane	ion channel
PKIA	cAMP-dependent protein kinase inhibitor alpha	-122.238							Cytoplasm	other
PKP4	plakophilin 4			60.098				55.869	Plasma Membrane	other
PLA2G4A	phospholipase A2 group IVA	200.55							Cytoplasm	enzyme		cytosolic phospholipase A2 inhibitor,quinacrine
PLAG1	PLAG1 zinc finger	68.256							Nucleus	transcription regulator
PLAU	plasminogen activator, urokinase	-167.111			74.589			51.292	Extracellular Space	peptidase	disease progression,efficacy,prognosis
PLAUR	plasminogen activator, urokinase receptor	484.24							Plasma Membrane	transmembrane receptor	diagnosis,disease progression
PLD2	phospholipase D2	166.443							Cytoplasm	enzyme
PLD3	phospholipase D family member 3	181.498							Cytoplasm	enzyme
PLEKHG3	pleckstrin homology and RhoGEF domain containing G3	94.587						-80.019	Other	other
PLEKHH2	pleckstrin homology, MyTH4 and FERM domain containing H2			19.938					Cytoplasm	other
PLIN2	perilipin 2	543.483							Plasma Membrane	other	disease progression
PLIN3	perilipin 3	206.09							Cytoplasm	other
PLK1	polo like kinase 1	-1030.62							Nucleus	kinase	unspecified application	BI 2536,GSK461364,lipid encapsulated anti-PLK1 siRNA TKM-080301,MK1496,onvansertib,rigosertib,TAK-960,volasertib
PLK3	polo like kinase 3	253.595							Nucleus	kinase
PLOD2	procollagen-lysine,2-oxoglutarate 5-dioxygenase 2							98.489	Cytoplasm	enzyme
PLPP2	phospholipid phosphatase 2	424.366			228.288				Plasma Membrane	phosphatase
PLPP3	phospholipid phosphatase 3				30.443				Plasma Membrane	phosphatase
PLPP6	phospholipid phosphatase 6					48.479			Plasma Membrane	phosphatase
PLPP7	phospholipid phosphatase 7 (inactive)			31.694	52.574				Nucleus	phosphatase
PLPPR2	phospholipid phosphatase related 2	-233.742							Other	phosphatase
PMEPA1	prostate transmembrane protein, androgen induced 1	136.326							Plasma Membrane	other
PMPCA	peptidase, mitochondrial processing subunit alpha	-230.038							Cytoplasm	peptidase
PMPCB	peptidase, mitochondrial processing subunit beta							-233.186	Cytoplasm	peptidase
PMVK	phosphomevalonate kinase	272.855							Cytoplasm	kinase
PNCK	pregnancy up-regulated nonubiquitous CaM kinase						-47.479		Other	kinase
PNP	purine nucleoside phosphorylase		32.105						Nucleus	enzyme		forodesine,PD 141955,purine nucleoside phosphorylase inhibitor
PNPLA2	patatin like phospholipase domain containing 2	197.735							Cytoplasm	enzyme
PNPO	pyridoxamine 5'-phosphate oxidase							-50.407	Cytoplasm	enzyme	unspecified application
PNRC1	proline rich nuclear receptor coactivator 1				55.508				Nucleus	other
POC5	POC5 centriolar protein						-23.967		Cytoplasm	other
POC1A	POC1 centriolar protein A	48.145							Cytoplasm	peptidase
Podxl	podocalyxin-like							31.346	Plasma Membrane	other
POGK	pogo transposable element derived with KRAB domain			-37.247	-35.674				Nucleus	other
POGLUT3	protein O-glucosyltransferase 3					-56.66			Other	enzyme
POLD4	DNA polymerase delta 4, accessory subunit	82.296							Nucleus	enzyme
POLDIP3	DNA polymerase delta interacting protein 3							-20.813	Nucleus	other
POLE2	DNA polymerase epsilon 2, accessory subunit		-141.146			-169.623			Nucleus	enzyme		bortezomib/cladribine/rituximab,cladribine,cladribine/cytarabine/daunorubicin,cladribine/cytarabine/decitabine,cladribine/cytarabine/filgrastim,cladribine/cytarabine/filgrastim/idarubicin,cladribine/cytarabine/filgrastim/idarubicin/plerixafor,cladribine/cytarabine/filgrastim/mitoxantrone,cladribine/peginterferon alfa-2a,cladribine/recombinant interferon,cladribine/rituximab
POLE3	DNA polymerase epsilon 3, accessory subunit	-316.233							Nucleus	enzyme		bortezomib/cladribine/rituximab,cladribine,cladribine/cytarabine/daunorubicin,cladribine/cytarabine/decitabine,cladribine/cytarabine/filgrastim,cladribine/cytarabine/filgrastim/idarubicin,cladribine/cytarabine/filgrastim/idarubicin/plerixafor,cladribine/cytarabine/filgrastim/mitoxantrone,cladribine/peginterferon alfa-2a,cladribine/recombinant interferon,cladribine/rituximab
POLI	DNA polymerase iota	-72.861							Nucleus	enzyme
POLK	DNA polymerase kappa					-66.273			Nucleus	enzyme
POLM	DNA polymerase mu					43.806			Nucleus	enzyme
POLR1A	RNA polymerase I subunit A	216.19	225.365	217.914					Nucleus	enzyme
POLR2C	RNA polymerase II subunit C					-133.823		-208.237	Nucleus	enzyme
POLR2D	RNA polymerase II subunit D	-165.523							Nucleus	enzyme
POLR2F	RNA polymerase II subunit F	-176.497							Nucleus	enzyme
POLR2H	RNA polymerase II subunit H					43.441			Nucleus	enzyme
POLR3C	RNA polymerase III subunit C						-362.214		Nucleus	enzyme
POLR3G	RNA polymerase III subunit G				44.101				Nucleus	enzyme
POLR3K	RNA polymerase III subunit K	-49.973							Nucleus	transcription regulator
POLRMT	RNA polymerase mitochondrial						37.597		Cytoplasm	enzyme
POMT2	protein O-mannosyltransferase 2	78.331							Cytoplasm	enzyme
POP1	POP1 homolog, ribonuclease P/MRP subunit					68.103			Nucleus	enzyme
POP5	POP5 homolog, ribonuclease P/MRP subunit	-79.456			113.439				Nucleus	enzyme
POR	cytochrome p450 oxidoreductase		121.109						Cytoplasm	enzyme		carboplatin/doxorubicin,cisplatin/doxorubicin,cisplatin/doxorubicin/ifosfamide,cisplatin/doxorubicin/ifosfamide/methotrexate,cisplatin/doxorubicin/methotrexate,dacarbazine/doxorubicin,dacarbazine/doxorubicin/ifosfamide,daunorubicin,daunorubicin/tretinoin,doxorubicin,doxorubicin/ifosfamide,doxorubicin/streptozocin,doxorubicin/tretinoin,nitazoxanide,nitazoxanide/peginterferon alfa-2a/ribavirin
PPA1	inorganic pyrophosphatase 1	-677.864							Cytoplasm	enzyme
PPAN	peter pan homolog							153.77	Nucleus	other
PPARGC1A	PPARG coactivator 1 alpha	443.512							Nucleus	transcription regulator	diagnosis,efficacy
PPIC	peptidylprolyl isomerase C	-357.48						-71.303	Cytoplasm	enzyme
PPID	peptidylprolyl isomerase D	-304.195							Cytoplasm	enzyme
PPIH	peptidylprolyl isomerase H	-231.577							Nucleus	enzyme
PPIL4	peptidylprolyl isomerase like 4	-163.77							Nucleus	enzyme
PPM1E	protein phosphatase, Mg2+/Mn2+ dependent 1E			82.73	51.32				Nucleus	phosphatase
PPM1H	protein phosphatase, Mg2+/Mn2+ dependent 1H			24.514					Nucleus	phosphatase
PPP1R7	protein phosphatase 1 regulatory subunit 7					89.289			Nucleus	phosphatase
PPP1R35	protein phosphatase 1 regulatory subunit 35			30.899	117.504				Other	other
PPP1R12C	protein phosphatase 1 regulatory subunit 12C						-67.602		Cytoplasm	phosphatase
PPP1R13L	protein phosphatase 1 regulatory subunit 13 like			20.569					Nucleus	transcription regulator
PPP1R15A	protein phosphatase 1 regulatory subunit 15A	53.596							Cytoplasm	other
PPP1R16A	protein phosphatase 1 regulatory subunit 16A							32.512	Plasma Membrane	other
PPP1R1B	protein phosphatase 1 regulatory inhibitor subunit 1B					46.632			Cytoplasm	phosphatase
Ppp1r2-ps3	protein phosphatase 1, regulatory (inhibitor) subunit 2, pseudogene 3						-48.33		Other	other
PPP1R9B	protein phosphatase 1 regulatory subunit 9B	123.279							Cytoplasm	enzyme
PPP2CA	protein phosphatase 2 catalytic subunit alpha		-68.889						Cytoplasm	phosphatase
PPP2R5A	protein phosphatase 2 regulatory subunit B'alpha	215.525							Cytoplasm	phosphatase
PPP2R5B	protein phosphatase 2 regulatory subunit B'beta	106.551							Cytoplasm	phosphatase
PPP4R1	protein phosphatase 4 regulatory subunit 1							158.094	Other	phosphatase
PPP6R1	protein phosphatase 6 regulatory subunit 1					38.797			Cytoplasm	other
PPP6R2	protein phosphatase 6 regulatory subunit 2	-39.112							Cytoplasm	other
PPTC7	protein phosphatase targeting COQ7	85.709							Cytoplasm	phosphatase
PRAG1	PEAK1 related, kinase-activating pseudokinase 1						-25.598		Nucleus	kinase
PRCC	proline rich mitotic checkpoint control factor					72.301			Nucleus	other
PRDM5	PR/SET domain 5					59.956	46.286		Nucleus	transcription regulator
PRDX1	peroxiredoxin 1	-482.234							Cytoplasm	enzyme	diagnosis
PRDX2	peroxiredoxin 2	-508.214			252.72				Cytoplasm	enzyme
PRDX4	peroxiredoxin 4			-393.231		-264.124			Cytoplasm	enzyme
PREB	prolactin regulatory element binding					183.328			Nucleus	transcription regulator
PRELID1	PRELI domain containing 1					277.339	189.874		Cytoplasm	other
PREP	prolyl endopeptidase						-103.811		Cytoplasm	peptidase		Z 321
PREX2	phosphatidylinositol-3,4,5-trisphosphate dependent Rac exchange factor 2	-78.378				-56.352			Cytoplasm	other
PRKAB1	protein kinase AMP-activated non-catalytic subunit beta 1					-77.256		-110.071	Nucleus	kinase
PRKAG2	protein kinase AMP-activated non-catalytic subunit gamma 2	-94.394							Cytoplasm	kinase
PRKAR2B	protein kinase cAMP-dependent type II regulatory subunit beta	-227.12							Cytoplasm	kinase
PRKCE	protein kinase C epsilon							58.6	Cytoplasm	kinase	disease progression	ingenol mebutate,protein kinase C-epsilon activator
PRKCI	protein kinase C iota	-312.047							Cytoplasm	kinase	unspecified application	ingenol mebutate
PRKG2	protein kinase cGMP-dependent 2	230.764							Cytoplasm	kinase
PRMT1	protein arginine methyltransferase 1	-730.652						-166.24	Nucleus	enzyme		GSK3368715
PRMT2	protein arginine methyltransferase 2				78.394				Nucleus	enzyme
PRMT9	protein arginine methyltransferase 9	-44.992							Cytoplasm	enzyme
PROCR	protein C receptor	135.907							Plasma Membrane	other
Prol1	proline rich, lacrimal 1							18.899	Plasma Membrane	other
PROS1	protein S	134.136							Extracellular Space	other	diagnosis
PROX1	prospero homeobox 1					-22.972			Nucleus	transcription regulator	diagnosis,disease progression
PRPF8	pre-mRNA processing factor 8				129.535				Nucleus	other
PRPF19	pre-mRNA processing factor 19			51.665		71.946			Nucleus	enzyme
PRPF31	pre-mRNA processing factor 31			65.592		93.329			Nucleus	other
PRPF38A	pre-mRNA processing factor 38A				43.702				Nucleus	other
PRPS2	phosphoribosyl pyrophosphate synthetase 2		58.518			57.087			Cytoplasm	kinase
PRR5	proline rich 5			59.881	-35.513				Cytoplasm	other
PRR12	proline rich 12							83.929	Extracellular Space	other
Prr13	proline rich 13					62.568			Other	other
PRR32	proline rich 32					-26.725			Other	other
PRRC2A	proline rich coiled-coil 2A						73.207		Cytoplasm	other	safety
PRRG1	proline rich and Gla domain 1					-172.181			Plasma Membrane	other
Prss44	protease, serine 44			20.815					Cytoplasm	other
PRSS45P	serine protease 45, pseudogene	28.626							Other	peptidase
PRXL2C	peroxiredoxin like 2C	159.166							Other	other
PSAP	prosaposin	1867.92		-84.939					Extracellular Space	enzyme	unspecified application
PSD3	pleckstrin and Sec7 domain containing 3					-29.319			Cytoplasm	other
PSD	pleckstrin and Sec7 domain containing		-43.608						Cytoplasm	transporter
PSMA1	proteasome 20S subunit alpha 1	-440.767							Cytoplasm	peptidase
PSMA2	proteasome 20S subunit alpha 2							-332.99	Cytoplasm	peptidase	unspecified application
PSMB2	proteasome 20S subunit beta 2	-732.654							Cytoplasm	peptidase		bortezomib,bortezomib/cladribine/rituximab,bortezomib/dexamethasone,bortezomib/dexamethasone/doxorubicin,bortezomib/dexamethasone/lenalidomide,bortezomib/dexamethasone/pomalidomide,bortezomib/dexamethasone/rituximab,bortezomib/dexamethasone/thalidomide,bortezomib/doxorubicin,bortezomib/fulvestrant,bortezomib/lenalidomide,bortezomib/paclitaxel,bortezomib/prednisone,bortezomib/rituximab,bortezomib/…
PSMB4	proteasome 20S subunit beta 4	-313.268							Cytoplasm	peptidase
PSMB5	proteasome 20S subunit beta 5	-67.487		18.351					Cytoplasm	peptidase		bortezomib,bortezomib/cladribine/rituximab,bortezomib/dexamethasone,bortezomib/dexamethasone/doxorubicin,bortezomib/dexamethasone/lenalidomide,bortezomib/dexamethasone/pomalidomide,bortezomib/dexamethasone/rituximab,bortezomib/dexamethasone/thalidomide,bortezomib/doxorubicin,bortezomib/fulvestrant,bortezomib/lenalidomide,bortezomib/paclitaxel,bortezomib/prednisone,bortezomib/rituximab,bortezomib/…
PSMC2	proteasome 26S subunit, ATPase 2	-349.938		163.811					Nucleus	peptidase
PSMC4	proteasome 26S subunit, ATPase 4	-187.365							Nucleus	peptidase
PSMC5	proteasome 26S subunit, ATPase 5					87.998			Nucleus	transcription regulator
PSMC6	proteasome 26S subunit, ATPase 6						-126.043		Nucleus	peptidase
PSMD1	proteasome 26S subunit, non-ATPase 1	-613.646				251.726			Cytoplasm	other		bortezomib,bortezomib/cladribine/rituximab,bortezomib/dexamethasone,bortezomib/dexamethasone/doxorubicin,bortezomib/dexamethasone/lenalidomide,bortezomib/dexamethasone/pomalidomide,bortezomib/dexamethasone/rituximab,bortezomib/dexamethasone/thalidomide,bortezomib/doxorubicin,bortezomib/fulvestrant,bortezomib/lenalidomide,bortezomib/paclitaxel,bortezomib/prednisone,bortezomib/rituximab,bortezomib/…
PSMD2	proteasome 26S subunit, non-ATPase 2	-263.135							Cytoplasm	other		bortezomib,bortezomib/cladribine/rituximab,bortezomib/dexamethasone,bortezomib/dexamethasone/doxorubicin,bortezomib/dexamethasone/lenalidomide,bortezomib/dexamethasone/pomalidomide,bortezomib/dexamethasone/rituximab,bortezomib/dexamethasone/thalidomide,bortezomib/doxorubicin,bortezomib/fulvestrant,bortezomib/lenalidomide,bortezomib/paclitaxel,bortezomib/prednisone,bortezomib/rituximab,bortezomib/…
PSMD3	proteasome 26S subunit, non-ATPase 3	-503.822			196.873				Cytoplasm	other
PSMD6	proteasome 26S subunit, non-ATPase 6	-232.594							Cytoplasm	enzyme
PSMD8	proteasome 26S subunit, non-ATPase 8						-141.548		Cytoplasm	other
PSMD13	proteasome 26S subunit, non-ATPase 13	-340.562							Cytoplasm	peptidase
PSMD14	proteasome 26S subunit, non-ATPase 14	-215.589							Cytoplasm	peptidase
PSME1	proteasome activator subunit 1			-64.964					Cytoplasm	other
Psme2b	protease (prosome, macropain) activator subunit 2B	-81.466							Other	other
PSMG1	proteasome assembly chaperone 1	-113.641							Plasma Membrane	other
PSTK	phosphoseryl-tRNA kinase	-22.151							Cytoplasm	kinase
PSTPIP2	proline-serine-threonine phosphatase interacting protein 2	-23.473							Cytoplasm	other
PTBP3	polypyrimidine tract binding protein 3				-50.206	-94.515			Nucleus	other
PTGES3	prostaglandin E synthase 3				209.83				Cytoplasm	enzyme
PTGS1	prostaglandin-endoperoxide synthase 1					-71.388			Cytoplasm	enzyme	efficacy	8Z,11Z,14Z-eicosatrienoic acid,acetaminophen,acetaminophen/aspirin/caffeine,acetaminophen/aspirin/codeine,acetaminophen/butalbital,acetaminophen/butalbital/caffeine,acetaminophen/butalbital/caffeine/codeine,acetaminophen/caffeine/chlorpheniramine/hydrocodone/phenylephrine,acetaminophen/caffeine/dihydrocodeine,acetaminophen/cetirizine/prednisolone,acetaminophen/clemastine/pseudoephedrine,acetamino…
PTGS2	prostaglandin-endoperoxide synthase 2	1341.42							Cytoplasm	enzyme	diagnosis,disease progression,efficacy,prognosis,unspecified application	acetaminophen,acetaminophen/aspirin/caffeine,acetaminophen/aspirin/codeine,acetaminophen/butalbital,acetaminophen/butalbital/caffeine,acetaminophen/butalbital/caffeine/codeine,acetaminophen/caffeine/chlorpheniramine/hydrocodone/phenylephrine,acetaminophen/caffeine/dihydrocodeine,acetaminophen/cetirizine/prednisolone,acetaminophen/clemastine/pseudoephedrine,acetaminophen/codeine,acetaminophen/dexb…
PTN	pleiotrophin	-1372.26							Extracellular Space	growth factor
PTOV1	PTOV1 extended AT-hook containing adaptor protein	-99.508							Nucleus	other
PTPN1	protein tyrosine phosphatase non-receptor type 1						46.89		Cytoplasm	phosphatase	prognosis	protein tyrosine phosphatase 1B inhibitor,trodusquemine
PTPN2	protein tyrosine phosphatase non-receptor type 2				207.96				Cytoplasm	phosphatase
PTPN9	protein tyrosine phosphatase non-receptor type 9						199.423		Cytoplasm	phosphatase
PTPN11	protein tyrosine phosphatase non-receptor type 11	118.506							Cytoplasm	phosphatase		JAB-3068,RLY-1971,RMC-4630,SHP2 allosteric inhibitor,TNO155
PTPN23	protein tyrosine phosphatase non-receptor type 23	131.589							Cytoplasm	phosphatase
PTPRE	protein tyrosine phosphatase receptor type E				32.985				Plasma Membrane	phosphatase
[truncated: 901 more rows]

## Sheet: Table S3a - Genes reg. 100 µM
Table S3a Genes differentially regulated at Rg5 concentrations 100 µM
Test sample code		S2
Ginsenoside Rg5 concentration, x = - log 10,		4
Symbol	Entrez Gene Name	Expr Fold Change	Location	Type(s)	Biomarker Application(s)	Drug(s)	Entrez Gene ID for Human	Entrez Gene ID for Mouse	Entrez Gene ID for Rat
SLC27A1	solute carrier family 27 member 1	2584.2	Plasma Membrane	transporter
NSDHL	NAD(P) dependent steroid dehydrogenase-like	2520.39	Cytoplasm	enzyme
FDPS	farnesyl diphosphate synthase	2466.66	Cytoplasm	enzyme		alendronate/cholecalciferol,alendronic acid,ibandronic acid,minodronate,pamidronic acid,risedronic acid,zoledronic acid
GRN	granulin precursor	2221.25	Extracellular Space	growth factor
Mt1	metallothionein 1	2212.35	Cytoplasm	other
SAT1	spermidine/spermine N1-acetyltransferase 1	2087.03	Cytoplasm	enzyme	diagnosis
LSS	lanosterol synthase	2055.51	Cytoplasm	enzyme		oxiconazole
CYP51A1	cytochrome P450 family 51 subfamily A member 1	1903.54	Cytoplasm	enzyme		betamethasone/clotrimazole,bifonazole,clotrimazole,econazole,efinaconazole,fluconazole,itraconazole,ketoconazole,luliconazole,miconazole,oxiconazole,posaconazole,sertaconazole,terconazole,voriconazole
NDRG1	N-myc downstream regulated 1	1897.69	Nucleus	kinase
SLC38A2	solute carrier family 38 member 2	1877.11	Plasma Membrane	transporter
PSAP	prosaposin	1867.92	Extracellular Space	enzyme	unspecified application
HMGCS1	3-hydroxy-3-methylglutaryl-CoA synthase 1	1867.34	Cytoplasm	enzyme
ZFAND2A	zinc finger AN1-type containing 2A	1858.27	Other	other
GPNMB	glycoprotein nmb	1697.71	Plasma Membrane	enzyme	unspecified application	glembatumumab,glembatumumab vedotin
CTSB	cathepsin B	1624.45	Cytoplasm	peptidase
CTSV	cathepsin V	1581.02	Cytoplasm	peptidase
Mt2	metallothionein 2	1565.84	Cytoplasm	other
SC5D	sterol-C5-desaturase	1557.98	Cytoplasm	enzyme
SOX9	SRY-box transcription factor 9	1517.76	Nucleus	transcription regulator	disease progression,prognosis
UAP1L1	UDP-N-acetylglucosamine pyrophosphorylase 1 like 1	1498.85	Other	other
INSIG1	insulin induced gene 1	1487.69	Cytoplasm	other
B2M	beta-2-microglobulin	1486.81	Plasma Membrane	transmembrane receptor	disease progression,efficacy,safety,unspecified application	4'-iodo-4'-deoxydoxorubicin
LGALS3	galectin 3	1471.8	Extracellular Space	other	diagnosis,unspecified application	GCS-100,GR-MD-02
MFSD1	major facilitator superfamily domain containing 1	1414.79	Other	transporter
ERO1A	endoplasmic reticulum oxidoreductase 1 alpha	1383.66	Cytoplasm	enzyme
CD34	CD34 molecule	1381.3	Plasma Membrane	other	efficacy,prognosis,unspecified application
ATP6AP2	ATPase H+ transporting accessory protein 2	1371.73	Cytoplasm	transporter
SLC6A9	solute carrier family 6 member 9	1363.66	Plasma Membrane	transporter
PTGS2	prostaglandin-endoperoxide synthase 2	1341.42	Cytoplasm	enzyme	diagnosis,disease progression,efficacy,prognosis,unspecified application	acetaminophen,acetaminophen/aspirin/caffeine,acetaminophen/aspirin/codeine,acetaminophen/butalbital,acetaminophen/butalbital/caffeine,acetaminophen/butalbital/caffeine/codeine,acetaminophen/caffeine/chlorpheniramine/hydrocodone/phenylephrine,acetaminophen/caffeine/dihydrocodeine,acetaminophen/cetirizine/prednisolone,acetaminophen/clemastine/pseudoephedrine,acetaminophen/codeine,acetaminophen/dexb…
ATF4	activating transcription factor 4	1335.61	Nucleus	transcription regulator	efficacy
SLC2A1	solute carrier family 2 member 1	1307.07	Plasma Membrane	transporter	diagnosis,efficacy
FDFT1	farnesyl-diphosphate farnesyltransferase 1	1292.17	Cytoplasm	enzyme	unspecified application	lapaquistat,zoledronic acid
DUSP4	dual specificity phosphatase 4	1290.3	Nucleus	phosphatase	diagnosis
SQLE	squalene epoxidase	1285.79	Cytoplasm	enzyme		butenafine,naftifine,terbinafine,tolnaftate
Pvr	poliovirus receptor	1283.56	Plasma Membrane	other
LAMP2	lysosomal associated membrane protein 2	1278.92	Plasma Membrane	enzyme
VAT1	vesicle amine transport 1	1274.02	Plasma Membrane	transporter
SLC6A8	solute carrier family 6 member 8	1269.03	Cytoplasm	transporter		RGX-202-01
SREBF2	sterol regulatory element binding transcription factor 2	1264.42	Nucleus	transcription regulator
TPP1	tripeptidyl peptidase 1	1244.7	Cytoplasm	peptidase
SLK	STE20 like kinase	1242.36	Nucleus	kinase
HMGA1	high mobility group AT-hook 1	1241.94	Nucleus	transcription regulator	unspecified application
HSPA4L	heat shock protein family A (Hsp70) member 4 like	1234.38	Cytoplasm	other
SERINC3	serine incorporator 3	1207.79	Cytoplasm	transporter
CTSD	cathepsin D	1196.64	Cytoplasm	peptidase	diagnosis,unspecified application
MMP2	matrix metallopeptidase 2	1175.77	Extracellular Space	peptidase	diagnosis,disease progression,efficacy,prognosis,response to therapy,unspecified application	marimastat,MMP2 MMP9 inhibitor,prinomastat,rebimastat
FXYD5	FXYD domain containing ion transport regulator 5	1157.9	Plasma Membrane	ion channel
CD63	CD63 molecule	1151.36	Plasma Membrane	other
AKR1B1	aldo-keto reductase family 1 member B	1148.09	Cytoplasm	enzyme		sorbinil	231	11677	24192
CD44	CD44 molecule (Indian blood group)	1127.36	Plasma Membrane	other	diagnosis,disease progression,prognosis,unspecified application	A6 peptide,AMC303,anti-CD44v7 antibody,RO5429083
CSTB	cystatin B	1114.55	Cytoplasm	peptidase	diagnosis
TNFRSF12A	TNF receptor superfamily member 12A	1107.27	Plasma Membrane	transmembrane receptor		enavatuzumab
ACAT2	acetyl-CoA acetyltransferase 2	1095.01	Cytoplasm	enzyme			39	110460|224530	308100|365096
ANGPTL2	angiopoietin like 2	1064.6	Extracellular Space	other
MFGE8	milk fat globule EGF and factor V/VIII domain containing	1060.84	Extracellular Space	other
RPL28	ribosomal protein L28	1043.67	Cytoplasm	other
SCPEP1	serine carboxypeptidase 1	1026.8	Cytoplasm	peptidase
GAA	glucosidase alpha, acid	1022.54	Cytoplasm	enzyme	diagnosis	acarbose,acarbose/orlistat,miglitol
ELOVL6	ELOVL fatty acid elongase 6	1021.73	Cytoplasm	enzyme
MCOLN1	mucolipin 1	1005.2	Cytoplasm	ion channel	diagnosis
SCD	stearoyl-CoA desaturase	991.326	Cytoplasm	enzyme	diagnosis
DHCR24	24-dehydrocholesterol reductase	990.902	Cytoplasm	enzyme
SLC7A1	solute carrier family 7 member 1	980.954	Plasma Membrane	transporter
CAPG	capping actin protein, gelsolin like	971.225	Nucleus	other
BTG1	BTG anti-proliferation factor 1	963.181	Nucleus	transcription regulator
SLC1A5	solute carrier family 1 member 5	951.791	Plasma Membrane	transporter
SLC3A2	solute carrier family 3 member 2	937.62	Plasma Membrane	transporter
IFRD1	interferon related developmental regulator 1	936.781	Nucleus	other
ASAH1	N-acylsphingosine amidohydrolase 1	935.777	Cytoplasm	enzyme	unspecified application
CHAC1	ChaC glutathione specific gamma-glutamylcyclotransferase 1	933.735	Cytoplasm	enzyme
RHOB	ras homolog family member B	911.338	Cytoplasm	enzyme
ACSL4	acyl-CoA synthetase long chain family member 4	909.641	Cytoplasm	enzyme			2182	50790	113976
AFF4	AF4/FMR2 family member 4	906.461	Nucleus	transcription regulator			27125	93736	303132
EIF3H	eukaryotic translation initiation factor 3 subunit H	893.971	Cytoplasm	enzyme
KLF6	Kruppel like factor 6	869.731	Nucleus	transcription regulator
MAP1LC3B	microtubule associated protein 1 light chain 3 beta	834.094	Cytoplasm	other
TSC22D1	TSC22 domain family member 1	833.074	Nucleus	transcription regulator
IDI1	isopentenyl-diphosphate delta isomerase 1	831.526	Cytoplasm	enzyme
THBS2	thrombospondin 2	826.785	Extracellular Space	other
HEXA	hexosaminidase subunit alpha	820.788	Cytoplasm	enzyme
EMP3	epithelial membrane protein 3	817.631	Plasma Membrane	other	diagnosis
RAI14	retinoic acid induced 14	812.394	Nucleus	transcription regulator
FADS1	fatty acid desaturase 1	808.366	Plasma Membrane	enzyme
AEBP1	AE binding protein 1	807.114	Nucleus	peptidase			165	11568	305494
MVD	mevalonate diphosphate decarboxylase	800.565	Cytoplasm	enzyme
FNIP1	folliculin interacting protein 1	795.593	Cytoplasm	other
NFE2L1	nuclear factor, erythroid 2 like 1	792.455	Nucleus	transcription regulator
CTNS	cystinosin, lysosomal cystine transporter	789.466	Cytoplasm	transporter
GLMP	glycosylated lysosomal membrane protein	784.393	Cytoplasm	transcription regulator
SLC39A6	solute carrier family 39 member 6	774.824	Plasma Membrane	transporter	disease progression	ladiratuzumab vedotin
RNH1	ribonuclease/angiogenin inhibitor 1	770.211	Cytoplasm	other
TNFAIP2	TNF alpha induced protein 2	764.173	Extracellular Space	other
HMOX1	heme oxygenase 1	754.124	Cytoplasm	enzyme	efficacy,safety,unspecified application	tin mesoporphyrin
RHOC	ras homolog family member C	747.864	Plasma Membrane	enzyme	diagnosis,prognosis
Pakap	paralemmin A kinase anchor protein	744.771	Other	other
TLR4	toll like receptor 4	737.978	Plasma Membrane	transmembrane receptor	efficacy	eritoran,GSK1795091,OM 174 lipid,resatorvid
HERPUD1	homocysteine inducible ER protein with ubiquitin like domain 1	735.148	Cytoplasm	other
CA6	carbonic anhydrase 6	731.051	Extracellular Space	enzyme		acetazolamide,benzthiazide,chlorothiazide,chlorthalidone,hydrochlorothiazide,methazolamide,SAR566658,sulfacetamide,topiramate,trichloromethiazide
MAPK3	mitogen-activated protein kinase 3	722.716	Cytoplasm	kinase	efficacy	ASN007,ASTX029,HH2710,KO-947,LY3214996,ulixertinib,ZSET 1446
RRAGC	Ras related GTP binding C	702.336	Cytoplasm	enzyme
EPS8	epidermal growth factor receptor pathway substrate 8	667.495	Plasma Membrane	peptidase
DBI	diazepam binding inhibitor, acyl-CoA binding protein	666.247	Cytoplasm	other
CD109	CD109 molecule	664.065	Plasma Membrane	other
KLF4	Kruppel like factor 4	657.606	Nucleus	transcription regulator
DUSP10	dual specificity phosphatase 10	655.869	Nucleus	phosphatase
UTP14C	UTP14C small subunit processome component	647.854	Nucleus	other
YPEL3	yippee like 3	644.25	Other	other
JUN	Jun proto-oncogene, AP-1 transcription factor subunit	637.693	Nucleus	transcription regulator	prognosis
SLC20A1	solute carrier family 20 member 1	637.65	Plasma Membrane	transporter
MYADM	myeloid associated differentiation marker	635.873	Nucleus	other
GARS1	glycyl-tRNA synthetase 1	631.985	Cytoplasm	enzyme
ANXA5	annexin A5	623.805	Plasma Membrane	transporter	diagnosis,efficacy
TIMM8A	translocase of inner mitochondrial membrane 8A	622.787	Cytoplasm	transporter
CRYAB	crystallin alpha B	619.071	Nucleus	other	diagnosis,disease progression,prognosis,unspecified application
LGMN	legumain	618.077	Cytoplasm	peptidase
SGMS2	sphingomyelin synthase 2	617.522	Plasma Membrane	enzyme
ADAMTSL5	ADAMTS like 5	615.89	Extracellular Space	other			339366	66548	314626
CD9	CD9 molecule	609.019	Plasma Membrane	other	efficacy
EIF4B	eukaryotic translation initiation factor 4B	608.11	Cytoplasm	translation regulator	unspecified application
ARL8A	ADP ribosylation factor like GTPase 8A	607.293	Cytoplasm	enzyme
FLCN	folliculin	598.557	Cytoplasm	other
ATF6	activating transcription factor 6	598.275	Cytoplasm	transcription regulator	efficacy
TTC39B	tetratricopeptide repeat domain 39B	595.159	Other	other
ALDH1L2	aldehyde dehydrogenase 1 family member L2	594.135	Cytoplasm	enzyme			160428	216188	299699
EIF4EBP1	eukaryotic translation initiation factor 4E binding protein 1	592.535	Cytoplasm	translation regulator	efficacy
GLA	galactosidase alpha	592.021	Cytoplasm	enzyme		migalastat
TFRC	transferrin receptor	589.96	Plasma Membrane	transporter	diagnosis,efficacy	CALAA-01,CX-2029,monoclonal antibody A27.15
SPP1	secreted phosphoprotein 1	588.692	Extracellular Space	cytokine	diagnosis,efficacy,unspecified application
SHMT2	serine hydroxymethyltransferase 2	588.228	Cytoplasm	enzyme
ATP6V0C	ATPase H+ transporting V0 subunit c	586.63	Cytoplasm	transporter
LDLR	low density lipoprotein receptor	584.766	Plasma Membrane	transporter	disease progression,unspecified application	iodine I 131 iodocholesterol
PIP4P1	phosphatidylinositol-4,5-bisphosphate 4-phosphatase 1	583.452	Cytoplasm	phosphatase
ESYT1	extended synaptotagmin 1	579.576	Cytoplasm	other
RNF11	ring finger protein 11	579.042	Cytoplasm	enzyme
MAP1B	microtubule associated protein 1B	576.889	Cytoplasm	other
DPP7	dipeptidyl peptidase 7	576.543	Cytoplasm	peptidase
CR1L	complement C3b/C4b receptor 1 like	575.719	Plasma Membrane	other
HIPK1	homeodomain interacting protein kinase 1	570.458	Nucleus	kinase
Scd2	stearoyl-Coenzyme A desaturase 2	568.713	Cytoplasm	enzyme
B4GALT5	beta-1,4-galactosyltransferase 5	559.535	Cytoplasm	enzyme	unspecified application
PCYT2	phosphate cytidylyltransferase 2, ethanolamine	559.388	Cytoplasm	enzyme
OSTM1	osteoclastogenesis associated transmembrane protein 1	556.714	Cytoplasm	other
GPI	glucose-6-phosphate isomerase	556.016	Extracellular Space	enzyme	unspecified application
ANXA11	annexin A11	555.018	Nucleus	other
DNAJB6	DnaJ heat shock protein family (Hsp40) member B6	550.878	Nucleus	transcription regulator
PTRH1	peptidyl-tRNA hydrolase 1 homolog	548.009	Cytoplasm	enzyme
YARS1	tyrosyl-tRNA synthetase 1	544.344	Cytoplasm	enzyme
PLIN2	perilipin 2	543.483	Plasma Membrane	other	disease progression
RARS1	arginyl-tRNA synthetase 1	541.951	Cytoplasm	enzyme
HSD17B7	hydroxysteroid 17-beta dehydrogenase 7	538.102	Cytoplasm	enzyme
DAP	death associated protein	535.362	Cytoplasm	transcription regulator
Slc25a1	solute carrier family 25 (mitochondrial carrier, citrate transporter), member 1	523.98	Cytoplasm	transporter
HSPA12A	heat shock protein family A (Hsp70) member 12A	523.44	Cytoplasm	other
WBP2	WW domain binding protein 2	520.097	Cytoplasm	transcription regulator
SNX30	sorting nexin family member 30	515.575	Other	other
EZR	ezrin	515.004	Plasma Membrane	other	prognosis
AHNAK2	AHNAK nucleoprotein 2	510.605	Cytoplasm	other			113146	100041194	314478
GLCE	glucuronic acid epimerase	503.976	Cytoplasm	enzyme
NEDD4L	NEDD4 like E3 ubiquitin protein ligase	502.54	Cytoplasm	enzyme
CAST	calpastatin	496.931	Cytoplasm	peptidase
MPV17	mitochondrial inner membrane protein MPV17	492.6	Cytoplasm	ion channel
RNF13	ring finger protein 13	490.733	Cytoplasm	enzyme
GBA	glucosylceramidase beta	489.706	Cytoplasm	enzyme
MAPK6	mitogen-activated protein kinase 6	488.151	Cytoplasm	kinase
PLAUR	plasminogen activator, urokinase receptor	484.24	Plasma Membrane	transmembrane receptor	diagnosis,disease progression
TEX264	testis expressed 264, ER-phagy receptor	477.933	Extracellular Space	other
LMBRD1	LMBR1 domain containing 1	470.788	Cytoplasm	enzyme
PGK1	phosphoglycerate kinase 1	469.38	Cytoplasm	kinase
TMEM184B	transmembrane protein 184B	467.243	Other	other
LRP8	LDL receptor related protein 8	458.648	Plasma Membrane	transmembrane receptor
SMURF1	SMAD specific E3 ubiquitin protein ligase 1	454.691	Cytoplasm	enzyme
PPARGC1A	PPARG coactivator 1 alpha	443.512	Nucleus	transcription regulator	diagnosis,efficacy
KLHL24	kelch like family member 24	437.743	Plasma Membrane	other
SYAP1	synapse associated protein 1	435.957	Nucleus	other
ETV5	ETS variant transcription factor 5	435.736	Nucleus	transcription regulator
C5orf51	chromosome 5 open reading frame 51	432.681	Other	other
TMEM251	transmembrane protein 251	429.798	Other	other
PDE4DIP	phosphodiesterase 4D interacting protein	428.675	Cytoplasm	enzyme	unspecified application
Gpr137b-ps	G protein-coupled receptor 137B, pseudogene	427.29	Other	other
PTPRN	protein tyrosine phosphatase receptor type N	426.443	Plasma Membrane	phosphatase
PLPP2	phospholipid phosphatase 2	424.366	Plasma Membrane	phosphatase
NBR1	NBR1 autophagy cargo receptor	423.276	Cytoplasm	other
GOT1	glutamic-oxaloacetic transaminase 1	421.514	Cytoplasm	enzyme
ZNF367	zinc finger protein 367	420.061	Nucleus	transcription regulator
TSPYL2	TSPY like 2	413.504	Nucleus	other
ANKH	ANKH inorganic pyrophosphate transport regulator	413.322	Plasma Membrane	transporter
DDX17	DEAD-box helicase 17	410.698	Nucleus	enzyme	unspecified application
BRI3	brain protein I3	408.482	Cytoplasm	other
STARD5	StAR related lipid transfer domain containing 5	407.999	Cytoplasm	transporter
LAPTM4A	lysosomal protein transmembrane 4 alpha	399.33	Cytoplasm	other
WASHC5	WASH complex subunit 5	397.565	Cytoplasm	other
YWHAH	tyrosine 3-monooxygenase/tryptophan 5-monooxygenase activation protein eta	395.837	Cytoplasm	transcription regulator	unspecified application
CERS5	ceramide synthase 5	395.743	Cytoplasm	transcription regulator	diagnosis
TSC22D3	TSC22 domain family member 3	394.212	Nucleus	transcription regulator
JUND	JunD proto-oncogene, AP-1 transcription factor subunit	394.166	Nucleus	transcription regulator
ADI1	acireductone dioxygenase 1	393.996	Nucleus	enzyme			55256	104923	298934
EPHA2	EPH receptor A2	393.045	Plasma Membrane	kinase	disease progression	afatinib/dasatinib,blinatumomab/dasatinib,BT5528,cytarabine/dasatinib,cytarabine/dasatinib/dexamethasone/methotrexate,cytarabine/dasatinib/filgrastim/fludarabine phosphate,cytarabine/dasatinib/filgrastim/fludarabine phosphate/idarubicin,dasatinib,dasatinib/6-mercaptopurine/methotrexate,dasatinib/dexamethasone,dasatinib/erlotinib,dasatinib/filgrastim,dasatinib/hydrocortisone,dasatinib/inotuzumab o…
FBXL2	F-box and leucine rich repeat protein 2	389.052	Cytoplasm	other
LONP1	lon peptidase 1, mitochondrial	385.784	Cytoplasm	peptidase
CUTA	cutA divalent cation tolerance homolog	385.694	Cytoplasm	other
PARVB	parvin beta	385.04	Cytoplasm	other
SLC30A4	solute carrier family 30 member 4	383.827	Cytoplasm	transporter
SEPTIN8	septin 8	382.775	Extracellular Space	other
IQGAP1	IQ motif containing GTPase activating protein 1	381.2	Cytoplasm	other
FAM50A	family with sequence similarity 50 member A	377.84	Nucleus	other
MSN	moesin	376.946	Plasma Membrane	other
RAPGEF2	Rap guanine nucleotide exchange factor 2	376.865	Cytoplasm	other
SGPL1	sphingosine-1-phosphate lyase 1	375.787	Cytoplasm	enzyme
STEAP3	STEAP3 metalloreductase	368.463	Cytoplasm	transporter
SLC38A7	solute carrier family 38 member 7	357.326	Plasma Membrane	transporter
GNL3	G protein nucleolar 3	356.852	Nucleus	other
TMBIM4	transmembrane BAX inhibitor motif containing 4	353.978	Nucleus	other
SLC6A6	solute carrier family 6 member 6	353.251	Plasma Membrane	transporter
ATP6V1C1	ATPase H+ transporting V1 subunit C1	352.868	Cytoplasm	transporter
P2RX4	purinergic receptor P2X 4	351.839	Plasma Membrane	ion channel
COMTD1	catechol-O-methyltransferase domain containing 1	351.526	Plasma Membrane	enzyme
MTDH	metadherin	351.289	Cytoplasm	transcription regulator	prognosis
SIRT2	sirtuin 2	350.568	Nucleus	transcription regulator
ELF2	E74 like ETS transcription factor 2	349.465	Nucleus	transcription regulator
PHF10	PHD finger protein 10	346.764	Nucleus	other
PKD2	polycystin 2, transient receptor potential cation channel	346.497	Plasma Membrane	ion channel
CSPG4	chondroitin sulfate proteoglycan 4	346.047	Plasma Membrane	other	unspecified application
CPE	carboxypeptidase E	345.98	Cytoplasm	peptidase
RAB31	RAB31, member RAS oncogene family	345.175	Cytoplasm	enzyme
SLC7A11	solute carrier family 7 member 11	344.422	Plasma Membrane	transporter		(4S)-4-(3-(18F)fluoropropyl)-L-glutamate,N-acetyl-L-cysteine
TULP4	TUB like protein 4	344.264	Cytoplasm	transcription regulator
CLCN5	chloride voltage-gated channel 5	343.337	Plasma Membrane	ion channel
PUM2	pumilio RNA binding family member 2	342.099	Cytoplasm	other
HEXB	hexosaminidase subunit beta	340.999	Cytoplasm	enzyme
UBA3	ubiquitin like modifier activating enzyme 3	340.855	Cytoplasm	enzyme
ATP2A2	ATPase sarcoplasmic/endoplasmic reticulum Ca2+ transporting 2	334.771	Cytoplasm	transporter
MOSPD1	motile sperm domain containing 1	331.816	Other	other
MCM7	minichromosome maintenance complex component 7	329.666	Nucleus	enzyme	diagnosis,disease progression
MAN1A1	mannosidase alpha class 1A member 1	329.249	Cytoplasm	enzyme
PIM1	Pim-1 proto-oncogene, serine/threonine kinase	329.224	Cytoplasm	kinase	disease progression,prognosis	AZD-1208,LGH447,PIM/FLT3 kinase inhibitor SEL24,SGI 1776
SLC66A3	solute carrier family 66 member 3	328.761	Other	other
FYN	FYN proto-oncogene, Src family tyrosine kinase	327.187	Plasma Membrane	kinase	efficacy	afatinib/dasatinib,blinatumomab/dasatinib,dasatinib,dasatinib/erlotinib,dasatinib/filgrastim,dasatinib/inotuzumab ozogamicin,dasatinib/nilotinib,dasatinib/rituximab,JNJ-26483327
ZNF800	zinc finger protein 800	325.481	Other	other
CBFB	core-binding factor subunit beta	324.851	Nucleus	transcription regulator
NABP1	nucleic acid binding protein 1	320.38	Nucleus	other
SUZ12	SUZ12 polycomb repressive complex 2 subunit	319.692	Nucleus	enzyme
STAT6	signal transducer and activator of transcription 6	316.229	Nucleus	transcription regulator	prognosis,response to therapy
HK1	hexokinase 1	315.075	Cytoplasm	kinase
CNPPD1	cyclin Pas1/PHO80 domain containing 1	311.398	Other	other
TMEM131	transmembrane protein 131	309.224	Extracellular Space	other
TAB2	TGF-beta activated kinase 1 (MAP3K7) binding protein 2	307.531	Cytoplasm	other
IAH1	isoamyl acetate hydrolyzing esterase 1 (putative)	305.032	Cytoplasm	other
CTTN	cortactin	303.96	Plasma Membrane	other	efficacy
ATP6V1H	ATPase H+ transporting V1 subunit H	302.872	Cytoplasm	transporter
RUSC2	RUN and SH3 domain containing 2	302.659	Cytoplasm	other
GHITM	growth hormone inducible transmembrane protein	302.133	Cytoplasm	other	unspecified application
LBR	lamin B receptor	299.616	Nucleus	enzyme
JTB	jumping translocation breakpoint	298.484	Plasma Membrane	other
KDSR	3-ketodihydrosphingosine reductase	297.883	Plasma Membrane	enzyme
MEF2A	myocyte enhancer factor 2A	294.365	Nucleus	transcription regulator
CHAF1B	chromatin assembly factor 1 subunit B	292.803	Nucleus	other	unspecified application
SPRED2	sprouty related EVH1 domain containing 2	292.635	Extracellular Space	cytokine
NFKBIB	NFKB inhibitor beta	292.109	Nucleus	transcription regulator
WDR81	WD repeat domain 81	291.005	Plasma Membrane	other
PFKP	phosphofructokinase, platelet	285.867	Cytoplasm	kinase
GPAT3	glycerol-3-phosphate acyltransferase 3	284.516	Cytoplasm	enzyme
RAB6A	RAB6A, member RAS oncogene family	284.39	Cytoplasm	enzyme
TOR1AIP2	torsin 1A interacting protein 2	283.051	Cytoplasm	other
STXBP1	syntaxin binding protein 1	281.916	Cytoplasm	transporter
SDCBP	syndecan binding protein	281.692	Plasma Membrane	enzyme
TRIB3	tribbles pseudokinase 3	280.856	Nucleus	kinase
DENND4A	DENN domain containing 4A	279.293	Nucleus	other
EDA2R	ectodysplasin A2 receptor	277.824	Plasma Membrane	transmembrane receptor
CD68	CD68 molecule	277.692	Plasma Membrane	other	diagnosis,efficacy
TINAGL1	tubulointerstitial nephritis antigen like 1	277.535	Extracellular Space	transporter
GCLC	glutamate-cysteine ligase catalytic subunit	277.513	Cytoplasm	enzyme
AKR1C3	aldo-keto reductase family 1 member C3	276.889	Cytoplasm	enzyme		ASP9521	8644	105349	171516
ETF1	eukaryotic translation termination factor 1	275.113	Cytoplasm	translation regulator
STAM	signal transducing adaptor molecule	274.869	Cytoplasm	other
MROH1	maestro heat like repeat family member 1	273.978	Other	other
PMVK	phosphomevalonate kinase	272.855	Cytoplasm	kinase
ATP6V1E1	ATPase H+ transporting V1 subunit E1	272.792	Cytoplasm	transporter
TMEM97	transmembrane protein 97	272.348	Extracellular Space	other		CT1812
ZBTB18	zinc finger and BTB domain containing 18	272.114	Nucleus	transcription regulator
GTPBP2	GTP binding protein 2	271.811	Extracellular Space	enzyme
SMAD1	SMAD family member 1	268.332	Nucleus	transcription regulator
SNX10	sorting nexin 10	267.639	Cytoplasm	transporter
PDZD8	PDZ domain containing 8	267.24	Extracellular Space	other
SLC8B1	solute carrier family 8 member B1	266.184	Plasma Membrane	transporter
TRIM16	tripartite motif containing 16	265.258	Cytoplasm	transcription regulator
Usp17la (includes others)	ubiquitin specific peptidase 17-like E	264.96	Cytoplasm	peptidase
HERPUD2	HERPUD family member 2	264.817	Other	other
SLC35F5	solute carrier family 35 member F5	263.167	Other	other
NOP53	NOP53 ribosome biogenesis factor	260.743	Cytoplasm	other
DHPS	deoxyhypusine synthase	260.066	Cytoplasm	enzyme	efficacy	dapsone
TMEM11	transmembrane protein 11	259.017	Plasma Membrane	G-protein coupled receptor
SPAG9	sperm associated antigen 9	258.48	Cytoplasm	other
ACOT2	acyl-CoA thioesterase 2	256.318	Cytoplasm	enzyme			10965	171210	192272
CALCOCO1	calcium binding and coiled-coil domain 1	255.102	Nucleus	transcription regulator
AFF1	AF4/FMR2 family member 1	253.939	Nucleus	transcription regulator			4299	17355	305152
PLK3	polo like kinase 3	253.595	Nucleus	kinase
RHBDD1	rhomboid domain containing 1	247.757	Extracellular Space	peptidase
VPS37B	VPS37B subunit of ESCRT-I	247.082	Cytoplasm	other
TRIM56	tripartite motif containing 56	246.545	Cytoplasm	enzyme
FGFR1	fibroblast growth factor receptor 1	246.385	Plasma Membrane	kinase	diagnosis,prognosis,unspecified application	3D185,5-azacytidine/sorafenib,ASP5878,bortezomib/sorafenib,clofarabine/cytarabine/sorafenib,crizotinib/pazopanib,cytarabine/idarubicin/sorafenib,debio 1347,decitabine/sorafenib,derazantinib,dexamethasone/lenalidomide/sorafenib,docetaxel/nintedanib,erdafitinib,everolimus/lenvatinib,everolimus/sorafenib,GSK3052230,imatinib/sorafenib,lapatinib/pazopanib,lenvatinib,lenvatinib/pembrolizumab,lucitanib,…
BHLHE40	basic helix-loop-helix family member e40	244.649	Nucleus	transcription regulator
MTBP	MDM2 binding protein	244.577	Cytoplasm	other
TOPBP1	DNA topoisomerase II binding protein 1	243.667	Nucleus	other
LTA4H	leukotriene A4 hydrolase	241.288	Cytoplasm	enzyme
FLOT1	flotillin 1	241.075	Plasma Membrane	other
CLIC1	chloride intracellular channel 1	241.034	Nucleus	ion channel
ECM1	extracellular matrix protein 1	240.797	Extracellular Space	transporter	diagnosis
TMEFF2	transmembrane protein with EGF like and two follistatin like domains 2	240.695	Cytoplasm	other
C9orf72	C9orf72-SMCR8 complex subunit	240.16	Cytoplasm	other
ARMCX1	armadillo repeat containing X-linked 1	239.235	Other	other
ATG9B	autophagy related 9B	239.206	Cytoplasm	other
SCAMP1	secretory carrier membrane protein 1	238.181	Cytoplasm	transporter
DERL1	derlin 1	237.208	Cytoplasm	other
NAGLU	N-acetyl-alpha-glucosaminidase	236.35	Cytoplasm	enzyme	unspecified application
SPTLC2	serine palmitoyltransferase long chain base subunit 2	235.845	Cytoplasm	enzyme
AVL9	AVL9 cell migration associated	231.079	Other	other
TMX1	thioredoxin related transmembrane protein 1	231.057	Cytoplasm	enzyme
PRKG2	protein kinase cGMP-dependent 2	230.764	Cytoplasm	kinase
RDH11	retinol dehydrogenase 11	230.137	Cytoplasm	enzyme
TMEM59	transmembrane protein 59	230.107	Plasma Membrane	peptidase
PDLIM1	PDZ and LIM domain 1	229.824	Cytoplasm	transcription regulator	unspecified application
LEPROTL1	leptin receptor overlapping transcript like 1	229.488	Plasma Membrane	other
LRRFIP1	LRR binding FLII interacting protein 1	229.155	Cytoplasm	transcription regulator
SLC1A4	solute carrier family 1 member 4	228.447	Plasma Membrane	transporter		riluzole
SAMD4A	sterile alpha motif domain containing 4A	227.855	Cytoplasm	translation regulator
ADAM9	ADAM metallopeptidase domain 9	227.292	Plasma Membrane	peptidase	efficacy,prognosis		8754	11502	290834
ETS2	ETS proto-oncogene 2, transcription factor	225.626	Nucleus	transcription regulator	efficacy
RAD50	RAD50 double strand break repair protein	225.421	Nucleus	enzyme
ZSWIM4	zinc finger SWIM-type containing 4	225.207	Other	other
SLC23A2	solute carrier family 23 member 2	224.088	Plasma Membrane	transporter
ANLN	anillin actin binding protein	223.644	Cytoplasm	other
ZEB2	zinc finger E-box binding homeobox 2	223.497	Nucleus	transcription regulator
USP53	ubiquitin specific peptidase 53	222.242	Extracellular Space	enzyme
LDB1	LIM domain binding 1	222.151	Nucleus	transcription regulator
SIGMAR1	sigma non-opioid intracellular receptor 1	221.853	Plasma Membrane	transmembrane receptor		acetaminophen/pentazocine,brompheniramine/dextromethorphan/pseudoephedrine,bupropion/dextromethorphan,bupropion/naltrexone,carbinoxamine/dextromethorphan/pseudoephedrine,chlorpheniramine/dextromethorphan/phenylephrine,dextromethorphan,dextromethorphan/morphine,dextromethorphan/promethazine,dextromethorphan/quinidine,dihydrocodeine,etorphine,hydromorphone,morphine/naltrexone,naloxone,naloxone/pent…
WDR74	WD repeat domain 74	220.511	Nucleus	other
ERN1	endoplasmic reticulum to nucleus signaling 1	220.402	Cytoplasm	kinase
PCK2	phosphoenolpyruvate carboxykinase 2, mitochondrial	220.28	Cytoplasm	kinase
NDFIP1	Nedd4 family interacting protein 1	218.636	Cytoplasm	other
NXF3	nuclear RNA export factor 3	218.576	Nucleus	transporter
TES	testin LIM domain protein	217.789	Plasma Membrane	other
FOXK2	forkhead box K2	217.761	Nucleus	transcription regulator
NAGA	alpha-N-acetylgalactosaminidase	216.888	Cytoplasm	enzyme
RNF14	ring finger protein 14	216.225	Cytoplasm	transcription regulator
POLR1A	RNA polymerase I subunit A	216.19	Nucleus	enzyme
AIG1	androgen induced 1	215.588	Other	enzyme			51390	66253	292486
PPP2R5A	protein phosphatase 2 regulatory subunit B'alpha	215.525	Cytoplasm	phosphatase
CLN5	CLN5 intracellular trafficking protein	215.363	Cytoplasm	other
LY96	lymphocyte antigen 96	214.054	Plasma Membrane	transmembrane receptor
FOXJ3	forkhead box J3	213.911	Nucleus	transcription regulator
LENG8	leukocyte receptor cluster member 8	213.665	Other	other
RAP1B	RAP1B, member of RAS oncogene family	212.09	Cytoplasm	enzyme	unspecified application
DHCR7	7-dehydrocholesterol reductase	211.909	Cytoplasm	enzyme	diagnosis
OSBPL2	oxysterol binding protein like 2	210.892	Cytoplasm	transporter
JMJD1C	jumonji domain containing 1C	210.509	Nucleus	enzyme
CORO1C	coronin 1C	210.134	Cytoplasm	other
STARD4	StAR related lipid transfer domain containing 4	209.464	Cytoplasm	transporter
CERS4	ceramide synthase 4	207.209	Cytoplasm	transcription regulator	diagnosis
VPS16	VPS16 core subunit of CORVET and HOPS complexes	207.122	Cytoplasm	transporter
FNIP2	folliculin interacting protein 2	207.121	Cytoplasm	other
PLIN3	perilipin 3	206.09	Cytoplasm	other
SLC41A2	solute carrier family 41 member 2	205.068	Plasma Membrane	transporter
DDIT3	DNA damage inducible transcript 3	204.288	Nucleus	transcription regulator
BRD2	bromodomain containing 2	203.002	Nucleus	kinase		BI 894999
PLA2G4A	phospholipase A2 group IVA	200.55	Cytoplasm	enzyme		cytosolic phospholipase A2 inhibitor,quinacrine
AAAS	aladin WD repeat nucleoporin	198.277	Nucleus	other			8086	223921	300259
PNPLA2	patatin like phospholipase domain containing 2	197.735	Cytoplasm	enzyme
CTTNBP2NL	CTTNBP2 N-terminal like	197.202	Cytoplasm	other
RUFY2	RUN and FYVE domain containing 2	196.495	Nucleus	other
WDR45	WD repeat domain 45	196.281	Cytoplasm	other
LAMB1	laminin subunit beta 1	196.06	Extracellular Space	other
HBP1	HMG-box transcription factor 1	195.777	Nucleus	transcription regulator
LRRC8D	leucine rich repeat containing 8 VRAC subunit D	194.222	Plasma Membrane	G-protein coupled receptor
GET3	guided entry of tail-anchored proteins factor 3, ATPase	193.435	Nucleus	transporter
CDK19	cyclin dependent kinase 19	192.837	Nucleus	kinase		alvocidib,SEL120,senexin B
CSNK1D	casein kinase 1 delta	192.456	Cytoplasm	kinase
CASC3	CASC3 exon junction complex subunit	191.471	Nucleus	other
NNMT	nicotinamide N-methyltransferase	191.458	Cytoplasm	enzyme	unspecified application	atorvastatin/niacin,lovastatin/niacin,nicotinic acid,nicotinic acid/pioglitazone
RAPH1	Ras association (RalGDS/AF-6) and pleckstrin homology domains 1	191.216	Plasma Membrane	other
FADS3	fatty acid desaturase 3	189.921	Plasma Membrane	enzyme
HK2	hexokinase 2	188.959	Cytoplasm	kinase
RCL1	RNA terminal phosphate cyclase like 1	187.331	Nucleus	enzyme
RETREG2	reticulophagy regulator family member 2	187.149	Other	other
VAC14	VAC14 component of PIKFYVE complex	186.022	Cytoplasm	other
ETS1	ETS proto-oncogene 1, transcription factor	185.806	Nucleus	transcription regulator	unspecified application
SNTB2	syntrophin beta 2	185.058	Plasma Membrane	other
IPO7	importin 7	184.482	Nucleus	transporter
ZSWIM8	zinc finger SWIM-type containing 8	183.611	Extracellular Space	other
PLD3	phospholipase D family member 3	181.498	Cytoplasm	enzyme
RAB9A	RAB9A, member RAS oncogene family	180.405	Cytoplasm	enzyme
RNF213	ring finger protein 213	180.27	Cytoplasm	enzyme
STK38L	serine/threonine kinase 38 like	178.245	Cytoplasm	kinase
CHRNB1	cholinergic receptor nicotinic beta 1 subunit	176.019	Plasma Membrane	transmembrane receptor		ABT-089,acetylcholine,amobarbital,arecoline,atracurium,cisatracurium,D-tubocurarine,doxacurium,enflurane,isoflurane,mecamylamine,metocurine,mivacurium,nicotine,pancuronium,pipecuronium,rapacuronium,rocuronium,succinylcholine,vecuronium
ARFGAP3	ADP ribosylation factor GTPase activating protein 3	175.916	Cytoplasm	transporter
GOLGA5	golgin A5	175.707	Cytoplasm	kinase
ST7L	suppression of tumorigenicity 7 like	173.653	Other	other
FBXO6	F-box protein 6	172.896	Cytoplasm	other
DRAM2	DNA damage regulated autophagy modulator 2	172.511	Cytoplasm	other
CEBPG	CCAAT enhancer binding protein gamma	172.292	Nucleus	transcription regulator
ANXA7	annexin A7	171.834	Plasma Membrane	ion channel
CAPN2	calpain 2	171.667	Cytoplasm	peptidase		alicapistat,BLD-2660
INTS12	integrator complex subunit 12	170.925	Nucleus	other
TLCD1	TLC domain containing 1	170.54	Plasma Membrane	other
ESYT2	extended synaptotagmin 2	169.866	Plasma Membrane	other
ETV4	ETS variant transcription factor 4	169.24	Nucleus	transcription regulator	unspecified application
STX3	syntaxin 3	167.352	Plasma Membrane	transporter
STK10	serine/threonine kinase 10	167.213	Cytoplasm	kinase
PLD2	phospholipase D2	166.443	Cytoplasm	enzyme
ABRAXAS1	abraxas 1, BRCA1 A complex subunit	165.229	Nucleus	other			84142	70681	289468
TOLLIP	toll interacting protein	164.222	Cytoplasm	other
Ifi202b	interferon activated gene 202B	163.584	Nucleus	other
XPO7	exportin 7	163.537	Nucleus	transporter
NAMPT	nicotinamide phosphoribosyltransferase	161.571	Extracellular Space	cytokine	diagnosis,prognosis	daporinad,KPT-9274
DDX3X	DEAD-box helicase 3 X-linked	160.9	Cytoplasm	enzyme	diagnosis
ACER3	alkaline ceramidase 3	160.062	Cytoplasm	enzyme			55331	66190	499210
PRXL2C	peroxiredoxin like 2C	159.166	Other	other
CRTC2	CREB regulated transcription coactivator 2	159.154	Nucleus	other
HSD3B7	hydroxy-delta-5-steroid dehydrogenase, 3 beta- and steroid delta-isomerase 7	159.083	Cytoplasm	enzyme
RNF146	ring finger protein 146	158.898	Cytoplasm	enzyme
KIAA1109	KIAA1109	157.869	Other	other
CCDC9	coiled-coil domain containing 9	157.848	Extracellular Space	other
STARD3	StAR related lipid transfer domain containing 3	157.799	Cytoplasm	transporter
DTX3	deltex E3 ubiquitin ligase 3	157.413	Cytoplasm	other
SLC37A3	solute carrier family 37 member 3	157.165	Cytoplasm	transporter
SLC25A37	solute carrier family 25 member 37	156.731	Cytoplasm	transporter
ELF1	E74 like ETS transcription factor 1	156.184	Nucleus	transcription regulator
ITPR2	inositol 1,4,5-trisphosphate receptor type 2	156.101	Cytoplasm	ion channel
ASL	argininosuccinate lyase	155.679	Cytoplasm	enzyme
ITGB1BP1	integrin subunit beta 1 binding protein 1	155.451	Plasma Membrane	other
Ehbp1l1	EH domain binding protein 1-like 1	155.144	Other	other
ALDH18A1	aldehyde dehydrogenase 18 family member A1	154.371	Cytoplasm	kinase			5832	56454	361755
DHX36	DEAH-box helicase 36	154.103	Cytoplasm	enzyme
SCARB2	scavenger receptor class B member 2	153.33	Plasma Membrane	transmembrane receptor	disease progression
TIMP1	TIMP metallopeptidase inhibitor 1	152.871	Extracellular Space	cytokine	diagnosis,disease progression,efficacy,prognosis,unspecified application
HSD17B11	hydroxysteroid 17-beta dehydrogenase 11	152.365	Cytoplasm	enzyme
SLC41A1	solute carrier family 41 member 1	152.053	Plasma Membrane	transporter
MAFK	MAF bZIP transcription factor K	151.829	Nucleus	transcription regulator
SLC4A8	solute carrier family 4 member 8	151.279	Plasma Membrane	transporter
KLF2	Kruppel like factor 2	150.182	Nucleus	transcription regulator
EFNA1	ephrin A1	149.948	Plasma Membrane	other
ATL3	atlastin GTPase 3	149.427	Cytoplasm	other
TMEM94	transmembrane protein 94	149.382	Extracellular Space	other
KIF3C	kinesin family member 3C	149.095	Cytoplasm	other
DAGLA	diacylglycerol lipase alpha	147.536	Plasma Membrane	enzyme
RABGEF1	RAB guanine nucleotide exchange factor 1	147.28	Cytoplasm	enzyme
RNF25	ring finger protein 25	147.144	Nucleus	transcription regulator
2610005L07Rik	cadherin 11 pseudogene	146.495	Other	other				381598
S100PBP	S100P binding protein	146.003	Nucleus	other
SPPL3	signal peptide peptidase like 3	145.345	Cytoplasm	peptidase
SPPL2A	signal peptide peptidase like 2A	145.105	Plasma Membrane	peptidase
JOSD2	Josephin domain containing 2	143.721	Cytoplasm	enzyme
GOLPH3	golgi phosphoprotein 3	143.508	Cytoplasm	other
STAT2	signal transducer and activator of transcription 2	143.225	Nucleus	transcription regulator
APPL2	adaptor protein, phosphotyrosine interacting with PH domain and leucine zipper 2	143.191	Cytoplasm	other
RPL39	ribosomal protein L39	143.071	Cytoplasm	other
PIKFYVE	phosphoinositide kinase, FYVE-type zinc finger containing	142.662	Cytoplasm	kinase		apilimod
LSG1	large 60S subunit nuclear export GTPase 1	142.494	Cytoplasm	enzyme
COMMD4	COMM domain containing 4	141.958	Cytoplasm	other
MTHFR	methylenetetrahydrofolate reductase	141.074	Cytoplasm	enzyme	diagnosis,efficacy,response to therapy,safety
LPIN1	lipin 1	140.857	Nucleus	phosphatase
CLK1	CDC like kinase 1	140.071	Nucleus	kinase
DCUN1D5	defective in cullin neddylation 1 domain containing 5	139.604	Other	other
LMBR1L	limb development membrane protein 1 like	138.74	Plasma Membrane	transmembrane receptor
RELL1	RELT like 1	138.697	Plasma Membrane	other
ARHGAP17	Rho GTPase activating protein 17	138.59	Cytoplasm	other
LARS1	leucyl-tRNA synthetase 1	138.244	Cytoplasm	enzyme
SLC38A9	solute carrier family 38 member 9	136.879	Extracellular Space	transporter
PMEPA1	prostate transmembrane protein, androgen induced 1	136.326	Plasma Membrane	other
PROCR	protein C receptor	135.907	Plasma Membrane	other
OTUB2	OTU deubiquitinase, ubiquitin aldehyde binding 2	135.906	Nucleus	enzyme
PIEZO1	piezo type mechanosensitive ion channel component 1	135.428	Cytoplasm	ion channel
CD14	CD14 molecule	134.891	Plasma Membrane	transmembrane receptor	efficacy,unspecified application
SNX27	sorting nexin 27	134.576	Cytoplasm	other
ADIPOR2	adiponectin receptor 2	134.483	Plasma Membrane	transmembrane receptor			79602	68465	312670
PROS1	protein S	134.136	Extracellular Space	other	diagnosis
TCIM	transcriptional and immune response regulator	133.485	Nucleus	other
SIAH2	siah E3 ubiquitin protein ligase 2	133.463	Nucleus	transcription regulator	efficacy
KLHL21	kelch like family member 21	133.296	Cytoplasm	other
KDM6B	lysine demethylase 6B	132.949	Extracellular Space	enzyme
BACH1	BTB domain and CNC homolog 1	132.412	Nucleus	transcription regulator
DYM	dymeclin	132.199	Cytoplasm	other
EIF4EBP3	eukaryotic translation initiation factor 4E binding protein 3	131.805	Cytoplasm	other
PTPN23	protein tyrosine phosphatase non-receptor type 23	131.589	Cytoplasm	phosphatase
STAMBPL1	STAM binding protein like 1	131.541	Cytoplasm	enzyme
KLF13	Kruppel like factor 13	131.266	Nucleus	transcription regulator
RGS16	regulator of G protein signaling 16	130.963	Cytoplasm	enzyme		AGS-16M18
FAM76B	family with sequence similarity 76 member B	130.725	Nucleus	other
Sts	steroid sulfatase	130.699	Cytoplasm	enzyme
MAST4	microtubule associated serine/threonine kinase family member 4	130.615	Other	kinase
KDM7A	lysine demethylase 7A	130.524	Nucleus	enzyme
TMEM268	transmembrane protein 268	129.867	Cytoplasm	other
EIF2AK3	eukaryotic translation initiation factor 2 alpha kinase 3	129.646	Cytoplasm	kinase	efficacy
FAM13B	family with sequence similarity 13 member B	129.379	Cytoplasm	other
9930111J21Rik2	RIKEN cDNA 9930111J21 gene 2	127.931	Other	other				245240
CMTM4	CKLF like MARVEL transmembrane domain containing 4	126.596	Extracellular Space	cytokine
TAF6L	TATA-box binding protein associated factor 6 like	126.402	Nucleus	transcription regulator
TNFAIP1	TNF alpha induced protein 1	125.4	Plasma Membrane	ion channel
GCH1	GTP cyclohydrolase 1	124.221	Cytoplasm	enzyme
PPP1R9B	protein phosphatase 1 regulatory subunit 9B	123.279	Cytoplasm	enzyme
PACSIN3	protein kinase C and casein kinase substrate in neurons 3	122.512	Cytoplasm	other
GOLGA4	golgin A4	122.402	Cytoplasm	other
MINDY2	MINDY lysine 48 deubiquitinase 2	121.214	Nucleus	transporter
SMYD3	SET and MYND domain containing 3	120.543	Nucleus	enzyme
CPEB1	cytoplasmic polyadenylation element binding protein 1	119.98	Cytoplasm	translation regulator
GRPEL2	GrpE like 2, mitochondrial	119.83	Cytoplasm	other
TRIP10	thyroid hormone receptor interactor 10	119.582	Cytoplasm	other
VEGFB	vascular endothelial growth factor B	119.219	Extracellular Space	growth factor	efficacy,prognosis	aflibercept,aflibercept/bevacizumab,aflibercept/irinotecan
PTPN11	protein tyrosine phosphatase non-receptor type 11	118.506	Cytoplasm	phosphatase		JAB-3068,RLY-1971,RMC-4630,SHP2 allosteric inhibitor,TNO155
ZNF622	zinc finger protein 622	118.067	Nucleus	other
LRCH3	leucine rich repeats and calponin homology domain containing 3	117.202	Cytoplasm	other
HELQ	helicase, POLQ like	116.567	Nucleus	enzyme
ADAM17	ADAM metallopeptidase domain 17	116.133	Plasma Membrane	peptidase	unspecified application		6868	11491	57027
MRGBP	MRG domain binding protein	116.078	Nucleus	other
ZSWIM6	zinc finger SWIM-type containing 6	115.574	Extracellular Space	other
SWAP70	switching B cell complex subunit SWAP70	115.567	Cytoplasm	other
HDAC5	histone deacetylase 5	115.139	Nucleus	transcription regulator		belinostat,pyroxamide,tributyrin
BICRAL	BRD4 interacting chromatin remodeling complex associated protein like	115.129	Nucleus	other
GPS2	G protein pathway suppressor 2	114.81	Nucleus	transcription regulator
ALS2	alsin Rho guanine nucleotide exchange factor ALS2	114.675	Cytoplasm	other
CACNB3	calcium voltage-gated channel auxiliary subunit beta 3	114.591	Plasma Membrane	ion channel		dexamethasone/rituximab/verapamil,mibefradil,nimodipine,trandolapril/verapamil,verapamil
MAX	MYC associated factor X	114.432	Nucleus	transcription regulator
4930438A08Rik	RIKEN cDNA 4930438A08 gene	114.264	Other	other				73988	287305
BTAF1	B-TFIID TATA-box binding protein associated factor 1	113.558	Nucleus	transcription regulator
HELB	DNA helicase B	113.242	Nucleus	enzyme		capecitabine/epirubicin/oxaliplatin,chlorambucil/epirubicin,cyclophosphamide/docetaxel/epirubicin,cyclophosphamide/docetaxel/epirubicin/5-fluorouracil,cyclophosphamide/docetaxel/epirubicin/5-fluorouracil/trastuzumab,cyclophosphamide/epirubicin,cyclophosphamide/epirubicin/5-fluorouracil,cyclophosphamide/epirubicin/5-fluorouracil/paclitaxel,cyclophosphamide/epirubicin/5-fluorouracil/paclitaxel/tras…
CRYZL1	crystallin zeta like 1	113.181	Cytoplasm	enzyme
ARRDC4	arrestin domain containing 4	112.84	Plasma Membrane	other
Zfp760	zinc finger protein 760	112.602	Other	other
RDH13	retinol dehydrogenase 13	112.528	Cytoplasm	enzyme
KMT5B	lysine methyltransferase 5B	111.625	Nucleus	enzyme
SYNE1	spectrin repeat containing nuclear envelope protein 1	111.386	Nucleus	other
UHRF1BP1	UHRF1 binding protein 1	110.865	Other	other
RICTOR	RPTOR independent companion of MTOR complex 2	110.523	Cytoplasm	other
NDFIP2	Nedd4 family interacting protein 2	110.485	Cytoplasm	other
CYP4F11	cytochrome P450 family 4 subfamily F member 11	110.045	Cytoplasm	enzyme
DCAF12	DDB1 and CUL4 associated factor 12	108.834	Cytoplasm	other
ORC1	origin recognition complex subunit 1	108.632	Nucleus	other
SGSH	N-sulfoglucosamine sulfohydrolase	108.159	Cytoplasm	enzyme
KLF11	Kruppel like factor 11	108.105	Nucleus	transcription regulator
MAFF	MAF bZIP transcription factor F	107.311	Nucleus	transcription regulator
PPP2R5B	protein phosphatase 2 regulatory subunit B'beta	106.551	Cytoplasm	phosphatase
SP1	Sp1 transcription factor	106.319	Nucleus	transcription regulator
SNX8	sorting nexin 8	106.013	Cytoplasm	transporter
MTF2	metal response element binding transcription factor 2	105.588	Nucleus	transcription regulator
SRGAP1	SLIT-ROBO Rho GTPase activating protein 1	105.518	Cytoplasm	other
IL6R	interleukin 6 receptor	105.265	Plasma Membrane	transmembrane receptor	efficacy	methotrexate/sarilumab,methotrexate/tocilizumab,sarilumab,tocilizumab
DHRS9	dehydrogenase/reductase 9	105.175	Cytoplasm	enzyme
MASTL	microtubule associated serine/threonine kinase like	104.877	Cytoplasm	kinase
NFKB2	nuclear factor kappa B subunit 2	103.076	Nucleus	transcription regulator
CCPG1	cell cycle progression 1	103.019	Other	other
METTL27	methyltransferase like 27	102.75	Other	enzyme
NOP2	NOP2 nucleolar protein	102.458	Nucleus	other
CP	ceruloplasmin	102.353	Extracellular Space	enzyme	efficacy
PEAR1	platelet endothelial aggregation receptor 1	102.204	Plasma Membrane	other
WIPF2	WAS/WASL interacting protein family member 2	101.212	Cytoplasm	other
XPNPEP1	X-prolyl aminopeptidase 1	100.945	Cytoplasm	peptidase
SMIM13	small integral membrane protein 13	100.723	Other	other
CDK17	cyclin dependent kinase 17	100.577	Cytoplasm	kinase
GAS7	growth arrest specific 7	100.543	Cytoplasm	other
SEMA3C	semaphorin 3C	100.315	Extracellular Space	other
KLC2	kinesin light chain 2	99.366	Cytoplasm	other
PCDHGA12	protocadherin gamma subfamily A, 12	98.381	Plasma Membrane	other
CCDC130	coiled-coil domain containing 130	97.219	Other	other
OXSR1	oxidative stress responsive kinase 1	96.204	Nucleus	kinase
LRIF1	ligand dependent nuclear receptor interacting factor 1	95.727	Nucleus	other
GNPTG	N-acetylglucosamine-1-phosphate transferase subunit gamma	95.55	Cytoplasm	enzyme
LYST	lysosomal trafficking regulator	95.446	Cytoplasm	transporter
C12orf29	chromosome 12 open reading frame 29	94.95	Other	other
PLEKHG3	pleckstrin homology and RhoGEF domain containing G3	94.587	Other	other
JAK3	Janus kinase 3	94.557	Cytoplasm	kinase	efficacy	methotrexate/tofacitinib,PF-06651600,R-348,tofacitinib
DNASE1L1	deoxyribonuclease 1 like 1	94.305	Cytoplasm	enzyme
LDLRAP1	low density lipoprotein receptor adaptor protein 1	94.212	Cytoplasm	transporter
PDP2	pyruvate dehyrogenase phosphatase catalytic subunit 2	94.014	Cytoplasm	phosphatase
ING3	inhibitor of growth family member 3	93.525	Nucleus	other
UBE4A	ubiquitination factor E4A	93.369	Cytoplasm	enzyme
C5orf34	chromosome 5 open reading frame 34	92.205	Other	other
LRP12	LDL receptor related protein 12	92.19	Plasma Membrane	transmembrane receptor
TCN2	transcobalamin 2	92.031	Extracellular Space	transporter
Lncpint	long non-protein coding RNA, Trp53 induced transcript	91.706	Other	other
FOXO3	forkhead box O3	90.563	Nucleus	transcription regulator	efficacy
SLC2A13	solute carrier family 2 member 13	89.749	Plasma Membrane	transporter
KLF3	Kruppel like factor 3	89.51	Nucleus	transcription regulator
ZFYVE1	zinc finger FYVE-type containing 1	89.502	Cytoplasm	other
SOX4	SRY-box transcription factor 4	89.214	Nucleus	transcription regulator	unspecified application
DSN1	DSN1 component of MIS12 kinetochore complex	88.948	Nucleus	other
Sacs	sacsin	88.595	Cytoplasm	other
MTHFD1L	methylenetetrahydrofolate dehydrogenase (NADP+ dependent) 1 like	88.432	Cytoplasm	enzyme
LITAF	lipopolysaccharide induced TNF factor	88.339	Nucleus	transcription regulator
NOXO1	NADPH oxidase organizer 1	88.028	Plasma Membrane	other		ecabet
ETV1	ETS variant transcription factor 1	87.611	Nucleus	transcription regulator
MNT	MAX network transcriptional repressor	87.599	Nucleus	transcription regulator
CISD3	CDGSH iron sulfur domain 3	87.075	Cytoplasm	other
TMUB2	transmembrane and ubiquitin like domain containing 2	86.334	Other	other
TMEM179B	transmembrane protein 179B	86.275	Nucleus	other
NSUN4	NOP2/Sun RNA methyltransferase 4	86.237	Cytoplasm	enzyme
PELI2	pellino E3 ubiquitin protein ligase family member 2	86.144	Cytoplasm	enzyme
PPTC7	protein phosphatase targeting COQ7	85.709	Cytoplasm	phosphatase
MSRB1	methionine sulfoxide reductase B1	85.631	Nucleus	enzyme
DOCK11	dedicator of cytokinesis 11	85.603	Cytoplasm	other
TTC33	tetratricopeptide repeat domain 33	84.119	Other	other
ERGIC3	ERGIC and golgi 3	82.837	Cytoplasm	other
EXOC6B	exocyst complex component 6B	82.597	Other	other	unspecified application
CCNL2	cyclin L2	82.398	Nucleus	other
AGAP1	ArfGAP with GTPase domain, ankyrin repeat and PH domain 1	82.387	Cytoplasm	enzyme			116987	347722	316611
POLD4	DNA polymerase delta 4, accessory subunit	82.296	Nucleus	enzyme
TNS2	tensin 2	80.532	Plasma Membrane	enzyme
STAP2	signal transducing adaptor family member 2	80.364	Cytoplasm	other
GEM	GTP binding protein overexpressed in skeletal muscle	79.578	Plasma Membrane	enzyme
DVL1	dishevelled segment polarity protein 1	79.194	Cytoplasm	other
PHKG2	phosphorylase kinase catalytic subunit gamma 2	79.13	Cytoplasm	kinase
RFTN2	raftlin family member 2	78.964	Other	other
WDR62	WD repeat domain 62	78.915	Nucleus	other
S100A3	S100 calcium binding protein A3	78.716	Nucleus	transporter
CCNDBP1	cyclin D1 binding protein 1	78.626	Nucleus	other
POMT2	protein O-mannosyltransferase 2	78.331	Cytoplasm	enzyme
TMC6	transmembrane channel like 6	78.318	Cytoplasm	transporter
ARFRP1	ADP ribosylation factor related protein 1	78.249	Cytoplasm	enzyme
ARL11	ADP ribosylation factor like GTPase 11	77.997	Other	other
SPNS1	sphingolipid transporter 1 (putative)	77.351	Cytoplasm	transporter
CLN3	CLN3 lysosomal/endosomal transmembrane protein, battenin	77.222	Cytoplasm	other
STX11	syntaxin 11	77.099	Plasma Membrane	transporter
ZFR	zinc finger RNA binding protein	76.814	Nucleus	other
BLOC1S1	biogenesis of lysosomal organelles complex 1 subunit 1	76.788	Cytoplasm	other
HS2ST1	heparan sulfate 2-O-sulfotransferase 1	76.744	Cytoplasm	enzyme
FOXF2	forkhead box F2	76.681	Nucleus	transcription regulator
HIRIP3	HIRA interacting protein 3	76.283	Nucleus	other
BCL2L1	BCL2 like 1	76.206	Cytoplasm	other	efficacy,prognosis
FGD6	FYVE, RhoGEF and PH domain containing 6	75.539	Cytoplasm	other
Foxn3	forkhead box N3	75.509	Other	other
ITPRIP	inositol 1,4,5-trisphosphate receptor interacting protein	74.98	Extracellular Space	other
DAAM1	dishevelled associated activator of morphogenesis 1	74.53	Cytoplasm	other
RABEP1	rabaptin, RAB GTPase binding effector protein 1	74.37	Cytoplasm	transporter
IRF2BP2	interferon regulatory factor 2 binding protein 2	74.132	Nucleus	transcription regulator
IFFO2	intermediate filament family orphan 2	74.058	Other	other
DMAC2	distal membrane arm assembly complex 2	74.02	Cytoplasm	other
SLURP1	secreted LY6/PLAUR domain containing 1	73.462	Extracellular Space	cytokine
CHEK2	checkpoint kinase 2	72.593	Nucleus	kinase		XL844
RNF214	ring finger protein 214	72.07	Other	other
GTPBP6	GTP binding protein 6 (putative)	71.793	Other	other
WASHC1	WASH complex subunit 1	71.541	Cytoplasm	other
GYG1	glycogenin 1	71.518	Cytoplasm	enzyme
TADA3	transcriptional adaptor 3	71.171	Nucleus	transcription regulator
BRI3BP	BRI3 binding protein	71.159	Extracellular Space	other
ARMH3	armadillo like helical domain containing 3	70.978	Other	other
Fbxo38	F-box protein 38	70.869	Other	other
HHIPL1	HHIP like 1	70.583	Other	other
SKIV2L	Ski2 like RNA helicase	70.416	Nucleus	enzyme
ARHGAP21	Rho GTPase activating protein 21	70.309	Cytoplasm	other
NGDN	neuroguidin	70.04	Nucleus	other
SLC19A1	solute carrier family 19 member 1	69.46	Plasma Membrane	transporter	efficacy
SP9	Sp9 transcription factor	69.18	Other	transcription regulator
DDT	D-dopachrome tautomerase	68.929	Cytoplasm	enzyme
RBM34	RNA binding motif protein 34	68.776	Nucleus	other
AFAP1	actin filament associated protein 1	68.438	Cytoplasm	other	disease progression		60312	70292	140935
PLAG1	PLAG1 zinc finger	68.256	Nucleus	transcription regulator
CCDC28A	coiled-coil domain containing 28A	67.735	Other	other
CEBPB	CCAAT enhancer binding protein beta	67.573	Nucleus	transcription regulator
TMX2	thioredoxin related transmembrane protein 2	66.782	Other	enzyme
TAS1R2	taste 1 receptor member 2	66.712	Plasma Membrane	G-protein coupled receptor
SLC35E4	solute carrier family 35 member E4	66.3	Other	other
ENO2	enolase 2	65.989	Cytoplasm	enzyme	diagnosis,efficacy,prognosis,unspecified application
RNASE4	ribonuclease A family member 4	65.869	Extracellular Space	enzyme
MKRN1	makorin ring finger protein 1	62.741	Cytoplasm	enzyme
GLE1	GLE1 RNA export mediator	62.548	Nucleus	other
DHRS1	dehydrogenase/reductase 1	62.225	Cytoplasm	enzyme
INTS6L	integrator complex subunit 6 like	62.141	Nucleus	other
RALBP1	ralA binding protein 1	61.853	Cytoplasm	enzyme
CD55	CD55 molecule (Cromer blood group)	61.843	Plasma Membrane	other
ITGBL1	integrin subunit beta like 1	61.143	Extracellular Space	other
CPNE7	copine 7	60.822	Cytoplasm	transporter
EME2	essential meiotic structure-specific endonuclease subunit 2	60.657	Other	other
CHML	CHM like Rab escort protein	59.57	Cytoplasm	enzyme
DNA2	DNA replication helicase/nuclease 2	59.349	Cytoplasm	enzyme
CIART	circadian associated repressor of transcription	59.107	Nucleus	other
SUN2	Sad1 and UNC84 domain containing 2	58.669	Nucleus	other
SUN1	Sad1 and UNC84 domain containing 1	58.451	Nucleus	other
STX5	syntaxin 5	57.851	Cytoplasm	transporter
Gm3383 (includes others)	predicted gene 5797	57.628	Other	other
Esrra	estrogen related receptor, alpha	57.56	Nucleus	transcription regulator
QPCTL	glutaminyl-peptide cyclotransferase like	56.741	Cytoplasm	enzyme
GDF15	growth differentiation factor 15	56.63	Extracellular Space	growth factor	diagnosis
FAM118B	family with sequence similarity 118 member B	56.391	Other	other
BGLAP	bone gamma-carboxyglutamate protein	54.968	Extracellular Space	other	diagnosis,efficacy,safety	gallium nitrate
SRD5A1	steroid 5 alpha-reductase 1	54.931	Cytoplasm	enzyme		5-alpha-reductase inhibitor,dutasteride,dutasteride/tamsulosin,estradiol/levonorgestrel,ethinyl estradiol/levonorgestrel,finasteride,levonorgestrel
FCER2	Fc fragment of IgE receptor II	54.553	Plasma Membrane	transmembrane receptor	diagnosis,unspecified application	lumiliximab
GALC	galactosylceramidase	54.091	Cytoplasm	enzyme
ZNF598	zinc finger protein 598, E3 ubiquitin ligase	53.804	Extracellular Space	enzyme
PPP1R15A	protein phosphatase 1 regulatory subunit 15A	53.596	Cytoplasm	other
HIGD2A	HIG1 hypoxia inducible domain family member 2A	53.426	Cytoplasm	other
MINDY1	MINDY lysine 48 deubiquitinase 1	53.152	Cytoplasm	peptidase
ARIH2	ariadne RBR E3 ubiquitin protein ligase 2	52.679	Nucleus	enzyme	unspecified application
FBF1	Fas binding factor 1	52.531	Nucleus	other
GSTO2	glutathione S-transferase omega 2	51.932	Cytoplasm	enzyme
ATG16L1	autophagy related 16 like 1	51.173	Cytoplasm	enzyme
ACSBG1	acyl-CoA synthetase bubblegum family member 1	51.172	Cytoplasm	enzyme			23205	94180	171410
IL10RB	interleukin 10 receptor subunit beta	50.942	Plasma Membrane	transmembrane receptor
LRRK2	leucine rich repeat kinase 2	50.882	Cytoplasm	kinase	diagnosis
SH3BP2	SH3 domain binding protein 2	50.787	Cytoplasm	other
ERBB3	erb-b2 receptor tyrosine kinase 3	50.6	Plasma Membrane	kinase	efficacy,prognosis,safety	afatinib,afatinib/cetuximab,afatinib/dasatinib,afatinib/osimertinib,afatinib/paclitaxel,AV-203,BDTX-189,CDX-3379,crizotinib/osimertinib,elgemtumab,erlotinib/osimertinib,gefitinib/osimertinib,GSK2849330,istiratumab,ISU104,lumretuzumab,MCLA-128,MEHD7945A,MM-111,osimertinib,patritumab,REGN1400,sapitinib,seribantumab,sym013,U3-1402,zirconium-89-GSK2849330,zirconium-89-labeled RO5479599
RAB3GAP1	RAB3 GTPase activating protein catalytic subunit 1	50.264	Cytoplasm	other
EIF3C	eukaryotic translation initiation factor 3 subunit C	49.88	Cytoplasm	translation regulator	unspecified application
Ang2	angiogenin, ribonuclease A family, member 2	49.76	Other	enzyme
USP8	ubiquitin specific peptidase 8	49.688	Cytoplasm	peptidase
SLC49A4	solute carrier family 49 member 4	49.428	Other	other
WDFY1	WD repeat and FYVE domain containing 1	48.798	Cytoplasm	other
POC1A	POC1 centriolar protein A	48.145	Cytoplasm	peptidase
RAP1GAP2	RAP1 GTPase activating protein 2	47.965	Cytoplasm	other
SLC22A4	solute carrier family 22 member 4	47.84	Plasma Membrane	transporter
ASPA	aspartoacylase	47.783	Cytoplasm	enzyme
SMG8	SMG8 nonsense mediated mRNA decay factor	47.703	Cytoplasm	enzyme
HDAC4	histone deacetylase 4	47.672	Nucleus	transcription regulator		belinostat,OKI-179,pyroxamide,tributyrin
IKBKB	inhibitor of nuclear factor kappa B kinase subunit beta	47.582	Cytoplasm	kinase	unspecified application	auranofin,IKKbeta inhibitor
TMCO3	transmembrane and coiled-coil domains 3	47.253	Other	transporter
SPATA5L1	spermatogenesis associated 5 like 1	47.228	Other	other
Atp10d	ATPase, class V, type 10D	47.18	Cytoplasm	transporter
SYNJ2	synaptojanin 2	46.421	Cytoplasm	phosphatase
RAB35	RAB35, member RAS oncogene family	46.001	Cytoplasm	enzyme
G6PC	glucose-6-phosphatase catalytic subunit	45.06	Cytoplasm	phosphatase	unspecified application
PDE4C	phosphodiesterase 4C	44.859	Cytoplasm	enzyme		anagrelide,arofylline,caffeine,caffeine/ergotamine,cilomilast,dipyridamole,dyphylline,ibudilast,ketotifen,L 869298,L-826,141,milrinone,pentoxifylline,roflumilast,tetomilast,theophylline,tolbutamide
COPRS	coordinator of PRMT5 and differentiation stimulator	44.847	Nucleus	other
PEG3	paternally expressed 3	44.472	Nucleus	kinase	diagnosis
SPRED3	sprouty related EVH1 domain containing 3	43.839	Extracellular Space	cytokine
TMEM87B	transmembrane protein 87B	43.438	Cytoplasm	other
PTPRT	protein tyrosine phosphatase receptor type T	43.364	Plasma Membrane	phosphatase
AGFG2	ArfGAP with FG repeats 2	43.326	Other	other			3268	231801
RAB24	RAB24, member RAS oncogene family	42.911	Cytoplasm	other
DHX16	DEAH-box helicase 16	42.732	Nucleus	enzyme
UACA	uveal autoantigen with coiled-coil domains and ankyrin repeats	42.492	Cytoplasm	other
AQP3	aquaporin 3 (Gill blood group)	41.646	Plasma Membrane	transporter
TRAK2	trafficking kinesin protein 2	41.625	Plasma Membrane	transporter
RENBP	renin binding protein	41.449	Cytoplasm	enzyme
CPN1	carboxypeptidase N subunit 1	40.879	Extracellular Space	peptidase
SYNGR3	synaptogyrin 3	40.779	Plasma Membrane	other
FAF1	Fas associated factor 1	39.735	Nucleus	other
MLYCD	malonyl-CoA decarboxylase	39.225	Cytoplasm	enzyme
TSPAN12	tetraspanin 12	38.804	Plasma Membrane	other
PAWR	pro-apoptotic WT1 regulator	38.643	Nucleus	transcription regulator	prognosis
SPRY4	sprouty RTK signaling antagonist 4	38.53	Plasma Membrane	other
SLC25A28	solute carrier family 25 member 28	37.787	Cytoplasm	transporter
MLX	MAX dimerization protein MLX	37.645	Nucleus	transcription regulator
CNST	consortin, connexin sorting protein	37.502	Cytoplasm	other
ALDH16A1	aldehyde dehydrogenase 16 family member A1	37.402	Cytoplasm	enzyme			126133	69748	361571
CREBRF	CREB3 regulatory factor	37.174	Nucleus	transcription regulator
OSBPL3	oxysterol binding protein like 3	36.293	Cytoplasm	other
SLC26A11	solute carrier family 26 member 11	36.193	Cytoplasm	transporter
EVI2A	ecotropic viral integration site 2A	35.784	Plasma Membrane	transmembrane receptor
KDM5A	lysine demethylase 5A	35.669	Nucleus	transcription regulator
DYRK4	dual specificity tyrosine phosphorylation regulated kinase 4	35.306	Nucleus	kinase
HES5	hes family bHLH transcription factor 5	35.297	Nucleus	transcription regulator
FBXO32	F-box protein 32	35.194	Cytoplasm	enzyme	efficacy
HOXB2	homeobox B2	34.865	Nucleus	transcription regulator	diagnosis
TKFC	triokinase and FMN cyclase	34.192	Cytoplasm	kinase
SPDEF	SAM pointed domain containing ETS transcription factor	34.178	Nucleus	transcription regulator	efficacy,prognosis
GJC1	gap junction protein gamma 1	34.127	Plasma Membrane	ion channel
ZNF267	zinc finger protein 267	33.97	Nucleus	transcription regulator
ALG11	ALG11 alpha-1,2-mannosyltransferase	33.65	Other	other			440138	207958	361174
DOCK6	dedicator of cytokinesis 6	33.453	Cytoplasm	other
HOXC9	homeobox C9	33.298	Nucleus	transcription regulator
UBE2T	ubiquitin conjugating enzyme E2 T	33.166	Nucleus	enzyme
Zfp472	zinc finger protein 472	32.305	Nucleus	other
CHST1	carbohydrate sulfotransferase 1	32.13	Cytoplasm	enzyme
TMEM141	transmembrane protein 141	32.126	Other	other
APBA1	amyloid beta precursor protein binding family A member 1	31.563	Cytoplasm	transporter	diagnosis,response to therapy
NPW	neuropeptide W	31.536	Extracellular Space	other
ZFPM1	zinc finger protein, FOG family member 1	31.009	Nucleus	transcription regulator
RAB11FIP1	RAB11 family interacting protein 1	30.133	Cytoplasm	other
HSH2D	hematopoietic SH2 domain containing	29.646	Cytoplasm	other
SREBF1	sterol regulatory element binding transcription factor 1	29.515	Nucleus	transcription regulator	diagnosis
C10orf88	chromosome 10 open reading frame 88	29.407	Other	enzyme
NRBF2	nuclear receptor binding factor 2	29.216	Nucleus	transcription regulator
PGGHG	protein-glucosylgalactosylhydroxylysine glucosidase	28.865	Cytoplasm	enzyme
PRSS45P	serine protease 45, pseudogene	28.626	Other	peptidase
EIF4E2	eukaryotic translation initiation factor 4E family member 2	28.621	Cytoplasm	translation regulator
MPZL1	myelin protein zero like 1	28.473	Plasma Membrane	other
ZHX2	zinc fingers and homeoboxes 2	28.264	Nucleus	transcription regulator
GRAMD1B	GRAM domain containing 1B	28.21	Other	other
NGRN	neugrin, neurite outgrowth associated	28.009	Nucleus	other
ZNF729	zinc finger protein 729	27.585	Other	other
METTL18	methyltransferase like 18	26.617	Other	other
SNX29	sorting nexin 29	25.927	Cytoplasm	other
LRRC45	leucine rich repeat containing 45	25.894	Cytoplasm	other
SLC46A1	solute carrier family 46 member 1	25.871	Plasma Membrane	transporter
ABCB6	ATP binding cassette subfamily B member 6 (Langereis blood group)	25.861	Cytoplasm	transporter			10058	74104	140669
TTC4	tetratricopeptide repeat domain 4	25.71	Nucleus	other
DLGAP1	DLG associated protein 1	25.397	Plasma Membrane	other
CTRC	chymotrypsin C	25.148	Extracellular Space	peptidase
VIL1	villin 1	24.683	Cytoplasm	other
TRIM8	tripartite motif containing 8	24.266	Nucleus	enzyme
Lce3a (includes others)	late cornified envelope 3A	24.149	Other	other
RFXANK	regulatory factor X associated ankyrin containing protein	23.664	Nucleus	transcription regulator
KRT12	keratin 12	23.402	Cytoplasm	other
PDZK1IP1	PDZK1 interacting protein 1	22.934	Extracellular Space	other
CNGA3	cyclic nucleotide gated channel subunit alpha 3	22.847	Plasma Membrane	ion channel	unspecified application
TRAF3IP2	TRAF3 interacting protein 2	22.598	Cytoplasm	enzyme
OIT3	oncoprotein induced transcript 3	22.575	Nucleus	other
TMEM161B	transmembrane protein 161B	22.12	Other	other
Defb41	defensin beta 41	22.007	Extracellular Space	other
NOL4L	nucleolar protein 4 like	21.645	Other	other
AP5B1	adaptor related protein complex 5 subunit beta 1	21.216	Cytoplasm	other
CCDC171	coiled-coil domain containing 171	21.173	Other	other
COL5A3	collagen type V alpha 3 chain	21.137	Extracellular Space	other		collagenase clostridium histolyticum
ESM1	endothelial cell specific molecule 1	21.06	Extracellular Space	growth factor
IL22	interleukin 22	20.897	Extracellular Space	cytokine
ADCYAP1	adenylate cyclase activating polypeptide 1	20.686	Extracellular Space	other			116	11516	24166
CDKL2	cyclin dependent kinase like 2	20.598	Nucleus	kinase
SLC14A1	solute carrier family 14 member 1 (Kidd blood group)	20.538	Plasma Membrane	transporter
4933414I15Rik	RIKEN cDNA 4933414I15 gene	20.254	Other	other				74408
ACSM2A	acyl-CoA synthetase medium chain family member 2A	19.837	Cytoplasm	enzyme			123876	233799	246263
PEMT	phosphatidylethanolamine N-methyltransferase	-19.564	Cytoplasm	enzyme	diagnosis
RARB	retinoic acid receptor beta	-19.759	Nucleus	ligand-dependent nuclear receptor	diagnosis,efficacy,prognosis	acitretin,adapalene,AGN 190299,alitretinoin,daunorubicin/tretinoin,doxorubicin/tretinoin,etretinate,fenretinide,halobetasol propionate/tazarotene,idarubicin/tretinoin,isotretinoin,mitoxantrone/tretinoin,tamibarotene,tazarotene,theophylline/tretinoin/valproic acid,tretinoin
AMPH	amphiphysin	-20.348	Plasma Membrane	other
Rasl2-9	RAS-like, family 2, locus 9	-20.502	Nucleus	transporter
TTC26	tetratricopeptide repeat domain 26	-20.722	Extracellular Space	other
SLC25A35	solute carrier family 25 member 35	-20.835	Cytoplasm	other
1700001F09Rik (includes others)	predicted gene 5800	-21.345	Other	other				71826|385138|545047|666186|666207|666253|666376|666420|666485|666561|666647|666660|666675|666678|666723|100041106|100042055|100042342|100504444|100861719|102631639|102631744|102634269|102634304|102634872|102635067|102635261|102635554|102636283|102636509|102636873|102636948|102637812|102638116|102639794|102640847|102640955|108168153|108168156
CCL27	C-C motif chemokine ligand 27	-21.525	Other	other
MOB3B	MOB kinase activator 3B	-21.645	Other	other
Gm16440 (includes others)	predicted gene 16440	-21.676	Other	other
ZC3H13	zinc finger CCCH-type containing 13	-22.02	Extracellular Space	other
PSTK	phosphoseryl-tRNA kinase	-22.151	Cytoplasm	kinase
KANK2	KN motif and ankyrin repeat domains 2	-22.689	Nucleus	transcription regulator
DMAC2L	distal membrane arm assembly complex 2 like	-22.789	Cytoplasm	transporter
ZC3H12B	zinc finger CCCH-type containing 12B	-23.031	Other	other
PYGB	glycogen phosphorylase B	-23.058	Cytoplasm	enzyme
PSTPIP2	proline-serine-threonine phosphatase interacting protein 2	-23.473	Cytoplasm	other
SZRD1	SUZ RNA binding domain containing 1	-24.002	Other	other
CCDC25	coiled-coil domain containing 25	-24.097	Cytoplasm	other
MLLT1	MLLT1 super elongation complex subunit	-24.478	Nucleus	transcription regulator
RELT	RELT TNF receptor	-24.673	Plasma Membrane	transmembrane receptor
SOCS1	suppressor of cytokine signaling 1	-24.718	Cytoplasm	other	diagnosis,efficacy,safety
KCNH7	potassium voltage-gated channel subfamily H member 7	-24.774	Plasma Membrane	ion channel		dextromethorphan/quinidine,procainamide,quinidine
TRIM37	tripartite motif containing 37	-24.888	Cytoplasm	enzyme	diagnosis
Cyp2c54 (includes others)	cytochrome P450, family 2, subfamily c, polypeptide 54	-24.953	Cytoplasm	enzyme
GOLT1B	golgi transport 1B	-25.512	Cytoplasm	other
CLDN15	claudin 15	-25.801	Plasma Membrane	other
SIAH1	siah E3 ubiquitin protein ligase 1	-26.002	Nucleus	enzyme
MRPS18C	mitochondrial ribosomal protein S18C	-26.145	Cytoplasm	other
ISLR	immunoglobulin superfamily containing leucine rich repeat	-26.527	Extracellular Space	other
LRRC17	leucine rich repeat containing 17	-26.561	Extracellular Space	other
Gm6526	--	-26.671	Other	other
CEP19	centrosomal protein 19	-26.786	Cytoplasm	other
HOXD9	homeobox D9	-27.052	Nucleus	transcription regulator
RASL10B	RAS like family 10 member B	-27.095	Other	enzyme
CD80	CD80 molecule	-27.374	Plasma Membrane	transmembrane receptor	efficacy,prognosis	abatacept,abatacept/methotrexate,belatacept,galiximab
TTC12	tetratricopeptide repeat domain 12	-27.506	Cytoplasm	other
NBEA	neurobeachin	-28.206	Cytoplasm	other
2610008E11Rik	RIKEN cDNA 2610008E11 gene	-28.381	Other	other				72128	691170
DHX30	DExH-box helicase 30	-28.56	Nucleus	enzyme
TSEN15	tRNA splicing endonuclease subunit 15	-28.628	Nucleus	enzyme
NUAK2	NUAK family kinase 2	-29.115	Nucleus	kinase
ALG8	ALG8 alpha-1,3-glucosyltransferase	-29.248	Cytoplasm	enzyme			79053	381903	293129
ATXN7L2	ataxin 7 like 2	-29.411	Other	other
GIPC3	GIPC PDZ domain containing family member 3	-29.521	Other	other
2610318N02Rik	RIKEN cDNA 2610318N02 gene	-29.579	Other	other				70458	287935
Gstm6	glutathione S-transferase, mu 6	-29.632	Cytoplasm	enzyme
AI987944 (includes others)	expressed sequence AI987944	-29.72	Other	other				71508|77117|233168|234358|235956|626802|627901|668620|674842|100044193|102642386|105245382
CD83	CD83 molecule	-30.247	Plasma Membrane	transmembrane receptor
IKZF2	IKAROS family zinc finger 2	-30.513	Nucleus	transcription regulator
TBX3	T-box transcription factor 3	-30.659	Nucleus	transcription regulator
COQ6	coenzyme Q6, monooxygenase	-30.888	Cytoplasm	enzyme
MTMR14	myotubularin related protein 14	-31.209	Cytoplasm	phosphatase
FAM110A	family with sequence similarity 110 member A	-31.711	Other	other
NUDCD1	NudC domain containing 1	-31.872	Nucleus	other
BBS1	Bardet-Biedl syndrome 1	-31.88	Extracellular Space	other
Ccdc74a	coiled-coil domain containing 74A	-32.383	Other	other
PDSS2	decaprenyl diphosphate synthase subunit 2	-33.078	Cytoplasm	enzyme
XKR8	XK related 8	-33.286	Plasma Membrane	other
BUD13	BUD13 homolog	-33.469	Nucleus	other
SERINC4	serine incorporator 4	-33.486	Other	other
Lce1a2	late cornified envelope 1A2	-33.846	Other	other
ERMP1	endoplasmic reticulum metallopeptidase 1	-34.045	Cytoplasm	other
SKA3	spindle and kinetochore associated complex subunit 3	-34.489	Nucleus	other
PHF11	PHD finger protein 11	-34.554	Nucleus	other
IGLON5	IgLON family member 5	-34.818	Other	other
MRPL34	mitochondrial ribosomal protein L34	-34.854	Cytoplasm	other
BEND6	BEN domain containing 6	-34.857	Nucleus	transcription regulator
RALGAPA1	Ral GTPase activating protein catalytic subunit alpha 1	-34.86	Cytoplasm	other
FOXO1	forkhead box O1	-35.421	Nucleus	transcription regulator
TCTN1	tectonic family member 1	-35.472	Extracellular Space	other
LHPP	phospholysine phosphohistidine inorganic pyrophosphate phosphatase	-36.252	Cytoplasm	phosphatase
FAAP20	FA core complex associated protein 20	-36.291	Nucleus	other
MRPL9	mitochondrial ribosomal protein L9	-36.58	Cytoplasm	translation regulator	unspecified application
Fmr1nb	Fmr1 neighbor	-36.724	Nucleus	other
TRABD2B	TraB domain containing 2B	-37.036	Plasma Membrane	peptidase
SEC16B	SEC16 homolog B, endoplasmic reticulum export factor	-37.191	Nucleus	other
Ccl27a	chemokine (C-C motif) ligand 27A	-37.193	Extracellular Space	cytokine
PEX13	peroxisomal biogenesis factor 13	-37.566	Cytoplasm	transporter
Gm4836 (includes others)	predicted gene 4836	-37.642	Nucleus	other
FCHSD2	FCH and double SH3 domains 2	-37.768	Plasma Membrane	other
MNAT1	MNAT1 component of CDK activating kinase	-37.817	Nucleus	other
TRERF1	transcriptional regulating factor 1	-38.729	Nucleus	transcription regulator
TIMM21	translocase of inner mitochondrial membrane 21	-38.894	Cytoplasm	other
PPP6R2	protein phosphatase 6 regulatory subunit 2	-39.112	Cytoplasm	other
LUZP1	leucine zipper protein 1	-39.296	Nucleus	other
SLC25A51	solute carrier family 25 member 51	-39.349	Cytoplasm	transporter
NDUFB3	NADH:ubiquinone oxidoreductase subunit B3	-39.544	Cytoplasm	enzyme
ARHGAP33	Rho GTPase activating protein 33	-39.627	Plasma Membrane	transporter
ARHGEF25	Rho guanine nucleotide exchange factor 25	-39.741	Cytoplasm	other
NRIP3	nuclear receptor interacting protein 3	-39.741	Other	other
FRG1	FSHD region gene 1	-39.786	Nucleus	transporter
FAM185A	family with sequence similarity 185 member A	-39.921	Cytoplasm	other
GAB1	GRB2 associated binding protein 1	-39.941	Cytoplasm	other
RAB3D	RAB3D, member RAS oncogene family	-41.184	Cytoplasm	enzyme
Inafm2	InaF motif containing 2	-41.533	Other	other
AKTIP	AKT interacting protein	-41.709	Cytoplasm	other			64400	14339	291906
Obsl1	obscurin-like 1	-41.898	Other	other
NEXN	nexilin F-actin binding protein	-42.123	Plasma Membrane	other
NMI	N-myc and STAT interactor	-42.311	Cytoplasm	transcription regulator
OLFML2B	olfactomedin like 2B	-42.418	Extracellular Space	other
RAP2A	RAP2A, member of RAS oncogene family	-42.561	Plasma Membrane	enzyme	diagnosis
ENOX2	ecto-NOX disulfide-thiol exchanger 2	-42.657	Plasma Membrane	enzyme	efficacy
COQ2	coenzyme Q2, polyprenyltransferase	-43.143	Cytoplasm	enzyme
Xlr3c (includes others)	X-linked lymphocyte-regulated 3C	-43.99	Other	other
TUBA3E	tubulin alpha 3e	-44.033	Cytoplasm	other
DHODH	dihydroorotate dehydrogenase (quinone)	-44.138	Cytoplasm	enzyme		ASLAN003,BAY2402234,brequinar,dichloroallyl lawsone,leflunomide,teriflunomide,vidofludimus
GALNT13	polypeptide N-acetylgalactosaminyltransferase 13	-44.379	Cytoplasm	enzyme
APOOL	apolipoprotein O like	-44.865	Extracellular Space	other
PRMT9	protein arginine methyltransferase 9	-44.992	Cytoplasm	enzyme
FBXW4	F-box and WD repeat domain containing 4	-45.086	Cytoplasm	other
SRR	serine racemase	-45.244	Cytoplasm	enzyme
MORN2	MORN repeat containing 2	-45.462	Other	other
ABHD10	abhydrolase domain containing 10, depalmitoylase	-45.648	Cytoplasm	enzyme			55347	213012	303953
D2HGDH	D-2-hydroxyglutarate dehydrogenase	-45.666	Cytoplasm	enzyme
ZFYVE19	zinc finger FYVE-type containing 19	-45.918	Cytoplasm	other
SYNPR	synaptoporin	-45.976	Plasma Membrane	transporter
MRPS35	mitochondrial ribosomal protein S35	-46.509	Cytoplasm	other
ZNF449	zinc finger protein 449	-47.376	Nucleus	transcription regulator
D430020J02Rik	RIKEN cDNA D430020J02 gene	-48.107	Other	other
DUSP12	dual specificity phosphatase 12	-48.276	Nucleus	phosphatase
LRRN3	leucine rich repeat neuronal 3	-48.572	Extracellular Space	other
DND1	DND microRNA-mediated repression inhibitor 1	-49.504	Cytoplasm	other
CENPC	centromere protein C	-49.532	Nucleus	other
CPTP	ceramide-1-phosphate transfer protein	-49.591	Cytoplasm	transporter
GSKIP	GSK3B interacting protein	-49.831	Nucleus	other
POLR3K	RNA polymerase III subunit K	-49.973	Nucleus	transcription regulator
B230217C12Rik	RIKEN cDNA B230217C12 gene	-50.095	Other	other
SARDH	sarcosine dehydrogenase	-50.219	Cytoplasm	enzyme
HES1	hes family bHLH transcription factor 1	-50.737	Nucleus	transcription regulator
HDAC11	histone deacetylase 11	-50.823	Nucleus	transcription regulator		belinostat,pyroxamide,tributyrin
SNRNP27	small nuclear ribonucleoprotein U4/U6.U5 subunit 27	-51.332	Nucleus	other
C15orf40	chromosome 15 open reading frame 40	-51.438	Other	other
ATP23	ATP23 metallopeptidase and ATP synthase assembly factor homolog	-51.492	Plasma Membrane	kinase
COX11	cytochrome c oxidase copper chaperone COX11	-51.823	Cytoplasm	enzyme
TTC21B	tetratricopeptide repeat domain 21B	-52.556	Extracellular Space	other
PIK3C2B	phosphatidylinositol-4-phosphate 3-kinase catalytic subunit type 2 beta	-52.627	Cytoplasm	kinase
CAMKK1	calcium/calmodulin dependent protein kinase kinase 1	-52.746	Cytoplasm	kinase
PBX2	PBX homeobox 2	-52.81	Nucleus	transcription regulator
INSYN1	inhibitory synaptic factor 1	-53.301	Plasma Membrane	other
SLC16A6	solute carrier family 16 member 6	-53.576	Plasma Membrane	transporter
RPRD1B	regulation of nuclear pre-mRNA domain containing 1B	-53.702	Nucleus	other
RBAK	RB associated KRAB zinc finger	-54.032	Nucleus	transcription regulator
AURKAIP1	aurora kinase A interacting protein 1	-54.238	Nucleus	enzyme
Zfp60	zinc finger protein 60	-54.421	Nucleus	other
PDZRN3	PDZ domain containing ring finger 3	-54.806	Extracellular Space	enzyme
NUDT2	nudix hydrolase 2	-55.596	Plasma Membrane	phosphatase
MRPS34	mitochondrial ribosomal protein S34	-55.855	Cytoplasm	other
RHOG	ras homolog family member G	-56.551	Cytoplasm	enzyme
VPS54	VPS54 subunit of GARP complex	-56.674	Extracellular Space	other
NDUFAF6	NADH:ubiquinone oxidoreductase complex assembly factor 6	-56.826	Cytoplasm	other
MRPL41	mitochondrial ribosomal protein L41	-57.057	Cytoplasm	other
NSUN3	NOP2/Sun RNA methyltransferase 3	-57.093	Cytoplasm	enzyme
OSGEPL1	O-sialoglycoprotein endopeptidase like 1	-57.976	Cytoplasm	peptidase
UBE2Q2	ubiquitin conjugating enzyme E2 Q2	-58.149	Cytoplasm	enzyme
THUMPD3	THUMP domain containing 3	-58.663	Other	other
BBS2	Bardet-Biedl syndrome 2	-58.739	Cytoplasm	other
DUSP22	dual specificity phosphatase 22	-58.943	Cytoplasm	phosphatase
LPAR6	lysophosphatidic acid receptor 6	-59.137	Plasma Membrane	G-protein coupled receptor
ADO	2-aminoethanethiol dioxygenase	-59.726	Cytoplasm	enzyme			84890	211488	309732
SSC5D	scavenger receptor cysteine rich family member with 5 domains	-59.812	Plasma Membrane	transmembrane receptor
C3orf33	chromosome 3 open reading frame 33	-60.268	Extracellular Space	other
EML1	EMAP like 1	-61.24	Cytoplasm	other
KLHDC2	kelch domain containing 2	-61.779	Cytoplasm	other
DYSF	dysferlin	-61.989	Plasma Membrane	other
IFT80	intraflagellar transport 80	-62.099	Extracellular Space	other
CXCL6	C-X-C motif chemokine ligand 6	-62.284	Extracellular Space	cytokine	unspecified application
TTC19	tetratricopeptide repeat domain 19	-62.433	Cytoplasm	other
EDN1	endothelin 1	-62.59	Extracellular Space	cytokine	diagnosis,efficacy,prognosis,unspecified application
TRAPPC4	trafficking protein particle complex 4	-63.031	Cytoplasm	other
NME7	NME/NM23 family member 7	-63.324	Cytoplasm	kinase
SGCD	sarcoglycan delta	-63.49	Cytoplasm	other
NFYA	nuclear transcription factor Y subunit alpha	-63.567	Nucleus	transcription regulator
DPM1	dolichyl-phosphate mannosyltransferase subunit 1, catalytic	-64.387	Cytoplasm	enzyme
EGLN1	egl-9 family hypoxia inducible factor 1	-65.074	Cytoplasm	enzyme	prognosis
RRP8	ribosomal RNA processing 8	-65.577	Nucleus	enzyme
SDF4	stromal cell derived factor 4	-66.081	Cytoplasm	other
2310039H08Rik	RIKEN cDNA 2310039H08 gene	-67.162	Other	other				67101	681367
PSMB5	proteasome 20S subunit beta 5	-67.487	Cytoplasm	peptidase		bortezomib,bortezomib/cladribine/rituximab,bortezomib/dexamethasone,bortezomib/dexamethasone/doxorubicin,bortezomib/dexamethasone/lenalidomide,bortezomib/dexamethasone/pomalidomide,bortezomib/dexamethasone/rituximab,bortezomib/dexamethasone/thalidomide,bortezomib/doxorubicin,bortezomib/fulvestrant,bortezomib/lenalidomide,bortezomib/paclitaxel,bortezomib/prednisone,bortezomib/rituximab,bortezomib/…
CEP55	centrosomal protein 55	-68.014	Cytoplasm	other
C1R	complement C1r	-68.269	Extracellular Space	peptidase		SERPING1
SLC22A5	solute carrier family 22 member 5	-68.451	Plasma Membrane	transporter
FIS1	fission, mitochondrial 1	-69.16	Cytoplasm	other
APBB1IP	amyloid beta precursor protein binding family B member 1 interacting protein	-69.822	Cytoplasm	other
ITGB3BP	integrin subunit beta 3 binding protein	-69.931	Nucleus	other
RAB36	RAB36, member RAS oncogene family	-70.207	Cytoplasm	enzyme
KCTD20	potassium channel tetramerization domain containing 20	-70.483	Cytoplasm	other
PCGF3	polycomb group ring finger 3	-70.734	Nucleus	other
RCBTB2	RCC1 and BTB domain containing protein 2	-70.879	Cytoplasm	other
FUNDC2	FUN14 domain containing 2	-71.422	Cytoplasm	other
ASPM	assembly factor for spindle microtubules	-71.756	Nucleus	other
SH3RF3	SH3 domain containing ring finger 3	-72.748	Other	enzyme
POLI	DNA polymerase iota	-72.861	Nucleus	enzyme
PDCL3	phosducin like 3	-73.881	Cytoplasm	other
SPSB1	splA/ryanodine receptor domain and SOCS box containing 1	-74.526	Cytoplasm	other
SEMA3A	semaphorin 3A	-74.672	Extracellular Space	other
HUS1	HUS1 checkpoint clamp component	-75.697	Nucleus	kinase
Larp1b	La ribonucleoprotein domain family, member 1B	-75.852	Nucleus	other
NCBP3	nuclear cap binding subunit 3	-76.182	Nucleus	other
ARHGAP42	Rho GTPase activating protein 42	-76.463	Other	other
DPH3	diphthamide biosynthesis 3	-76.944	Cytoplasm	other
RAB11FIP2	RAB11 family interacting protein 2	-77.212	Cytoplasm	other
ZNF275	zinc finger protein 275	-77.49	Nucleus	transcription regulator
NOL12	nucleolar protein 12	-77.541	Nucleus	other
PARD6G	par-6 family cell polarity regulator gamma	-78.063	Plasma Membrane	other
PREX2	phosphatidylinositol-3,4,5-trisphosphate dependent Rac exchange factor 2	-78.378	Cytoplasm	other
NIT2	nitrilase family member 2	-78.587	Cytoplasm	enzyme
TCF19	transcription factor 19	-78.945	Nucleus	transcription regulator
SLC4A4	solute carrier family 4 member 4	-79.139	Plasma Membrane	transporter
PIP4P2	phosphatidylinositol-4,5-bisphosphate 4-phosphatase 2	-79.333	Cytoplasm	phosphatase
FAM136A	family with sequence similarity 136 member A	-79.429	Cytoplasm	other
POP5	POP5 homolog, ribonuclease P/MRP subunit	-79.456	Nucleus	enzyme
SENP2	SUMO specific peptidase 2	-79.485	Nucleus	peptidase
TFCP2	transcription factor CP2	-80.1	Nucleus	transcription regulator
ZNF280C	zinc finger protein 280C	-80.35	Nucleus	transcription regulator
LETM1	leucine zipper and EF-hand containing transmembrane protein 1	-80.681	Cytoplasm	transporter
ORC6	origin recognition complex subunit 6	-81.101	Nucleus	other
RNF149	ring finger protein 149	-81.254	Cytoplasm	enzyme
Psme2b	protease (prosome, macropain) activator subunit 2B	-81.466	Other	other
Serpinb6b	serine (or cysteine) peptidase inhibitor, clade B, member 6b	-81.506	Other	other
NOL10	nucleolar protein 10	-81.518	Nucleus	other
GCC2	GRIP and coiled-coil domain containing 2	-81.529	Cytoplasm	other
MTARC2	mitochondrial amidoxime reducing component 2	-82.391	Cytoplasm	enzyme
ROGDI	rogdi atypical leucine zipper	-82.424	Nucleus	other	unspecified application
Hsdl2	hydroxysteroid dehydrogenase like 2	-82.776	Cytoplasm	other
ARHGAP5	Rho GTPase activating protein 5	-82.988	Cytoplasm	enzyme
SLC25A45	solute carrier family 25 member 45	-83.093	Cytoplasm	transporter
EXO5	exonuclease 5	-83.596	Nucleus	enzyme
AK157302	cDNA sequence AK157302	-83.845	Cytoplasm	other				432732
MBD5	methyl-CpG binding domain protein 5	-83.866	Nucleus	other
SCAP	SREBF chaperone	-83.915	Cytoplasm	other
DMTF1	cyclin D binding myb like transcription factor 1	-84.086	Nucleus	transcription regulator
ANKRD27	ankyrin repeat domain 27	-84.245	Cytoplasm	other
ZNF703	zinc finger protein 703	-84.596	Nucleus	other
DUSP7	dual specificity phosphatase 7	-84.745	Cytoplasm	phosphatase
MTHFD2L	methylenetetrahydrofolate dehydrogenase (NADP+ dependent) 2 like	-85.269	Cytoplasm	enzyme
TATDN1	TatD DNase domain containing 1	-85.588	Extracellular Space	other
CPSF3	cleavage and polyadenylation specific factor 3	-86.049	Nucleus	enzyme
Ces2g	carboxylesterase 2G	-86.099	Other	enzyme
ZDHHC24	zinc finger DHHC-type containing 24	-86.944	Plasma Membrane	other
IREB2	iron responsive element binding protein 2	-87.118	Cytoplasm	translation regulator
DNAJC25	DnaJ heat shock protein family (Hsp40) member C25	-87.418	Other	other
HIBCH	3-hydroxyisobutyryl-CoA hydrolase	-88.098	Cytoplasm	enzyme
TTK	TTK protein kinase	-88.494	Nucleus	kinase		BAY 1217389,BOS172722
FECH	ferrochelatase	-88.496	Cytoplasm	enzyme
Dync1i2	dynein cytoplasmic 1 intermediate chain 2	-88.853	Cytoplasm	other
BRD7	bromodomain containing 7	-88.889	Nucleus	transcription regulator
EPB41L1	erythrocyte membrane protein band 4.1 like 1	-91.796	Plasma Membrane	other
TEAD1	TEA domain transcription factor 1	-93.42	Nucleus	transcription regulator
TENT5B	terminal nucleotidyltransferase 5B	-93.733	Other	other
HOXD8	homeobox D8	-93.794	Nucleus	transcription regulator
PRKAG2	protein kinase AMP-activated non-catalytic subunit gamma 2	-94.394	Cytoplasm	kinase
IARS2	isoleucyl-tRNA synthetase 2, mitochondrial	-94.412	Cytoplasm	enzyme
NXN	nucleoredoxin	-94.489	Nucleus	enzyme
DHX29	DExH-box helicase 29	-95.501	Cytoplasm	enzyme
PDIA5	protein disulfide isomerase family A member 5	-95.62	Cytoplasm	enzyme
ECHS1	enoyl-CoA hydratase, short chain 1	-95.624	Cytoplasm	enzyme
Norad	non-coding RNA activated by DNA damage	-97.171	Other	other
LIMD2	LIM domain containing 2	-97.332	Other	other	unspecified application
MTR	5-methyltetrahydrofolate-homocysteine methyltransferase	-97.658	Cytoplasm	enzyme		cyanocobalamin,hydroxocobalamin,mecobalamin
GID8	GID complex subunit 8 homolog	-98.653	Nucleus	other
G2E3	G2/M-phase specific E3 ubiquitin protein ligase	-98.71	Cytoplasm	enzyme
Anapc15	anaphase promoting complex C subunit 15	-98.716	Nucleus	other
PIK3R1	phosphoinositide-3-kinase regulatory subunit 1	-99.022	Cytoplasm	kinase
PTOV1	PTOV1 extended AT-hook containing adaptor protein	-99.508	Nucleus	other
SNRPB2	small nuclear ribonucleoprotein polypeptide B2	-99.689	Nucleus	other
GPX7	glutathione peroxidase 7	-99.883	Cytoplasm	enzyme
HBEGF	heparin binding EGF like growth factor	-100.103	Extracellular Space	growth factor	diagnosis,unspecified application	KHK2866,U3-1565
INTS8	integrator complex subunit 8	-101.078	Nucleus	other
ID3	inhibitor of DNA binding 3, HLH protein	-101.085	Nucleus	transcription regulator
TMEM216	transmembrane protein 216	-101.301	Extracellular Space	other
KIAA1549	KIAA1549	-102.142	Plasma Membrane	other
CCNY	cyclin Y	-102.165	Nucleus	other
RASL11A	RAS like family 11 member A	-102.19	Nucleus	other
NELFA	negative elongation factor complex member A	-103.646	Nucleus	other
NEIL3	nei like DNA glycosylase 3	-104.2	Nucleus	enzyme
CHERP	calcium homeostasis endoplasmic reticulum protein	-104.997	Cytoplasm	other
MEIS2	Meis homeobox 2	-105.093	Nucleus	transcription regulator
RUNX1T1	RUNX1 partner transcriptional co-repressor 1	-105.616	Nucleus	transcription regulator
SLC25A40	solute carrier family 25 member 40	-105.807	Cytoplasm	other
MGST2	microsomal glutathione S-transferase 2	-106.881	Cytoplasm	enzyme
RBMS2	RNA binding motif single stranded interacting protein 2	-107.102	Nucleus	other
S100A16	S100 calcium binding protein A16	-107.291	Nucleus	other
SLC1A3	solute carrier family 1 member 3	-107.674	Plasma Membrane	transporter		riluzole
RAB8B	RAB8B, member RAS oncogene family	-107.699	Cytoplasm	enzyme
DBT	dihydrolipoamide branched chain transacylase E2	-107.825	Cytoplasm	enzyme
PAK2	p21 (RAC1) activated kinase 2	-108.024	Cytoplasm	kinase
ECI1	enoyl-CoA delta isomerase 1	-108.089	Cytoplasm	enzyme
FIGNL1	fidgetin like 1	-108.188	Nucleus	enzyme
SRSF10	serine and arginine rich splicing factor 10	-108.391	Nucleus	other
TSN	translin	-109.872	Nucleus	other	unspecified application
HACD4	3-hydroxyacyl-CoA dehydratase 4	-109.937	Cytoplasm	enzyme
FAR1	fatty acyl-CoA reductase 1	-110.254	Cytoplasm	enzyme
CEP63	centrosomal protein 63	-110.456	Cytoplasm	other
DYRK2	dual specificity tyrosine phosphorylation regulated kinase 2	-111.363	Cytoplasm	kinase
COP1	COP1 E3 ubiquitin ligase	-111.572	Cytoplasm	enzyme
ARHGAP35	Rho GTPase activating protein 35	-111.672	Nucleus	transcription regulator
IPO11	importin 11	-111.765	Nucleus	other
THSD7A	thrombospondin type 1 domain containing 7A	-112.049	Cytoplasm	other
SNAPC5	small nuclear RNA activating complex polypeptide 5	-112.388	Nucleus	transcription regulator
Gm12666	predicted gene 12666	-112.549	Other	other
Cbr2	carbonyl reductase 2	-112.871	Cytoplasm	enzyme
ENC1	ectodermal-neural cortex 1	-112.889	Nucleus	peptidase
EBF3	EBF transcription factor 3	-113.41	Nucleus	transcription regulator
PSMG1	proteasome assembly chaperone 1	-113.641	Plasma Membrane	other
TM2D3	TM2 domain containing 3	-114.43	Other	other
RPL6	ribosomal protein L6	-114.576	Nucleus	other	unspecified application
CSTF1	cleavage stimulation factor subunit 1	-114.825	Nucleus	other
ABRACL	ABRA C-terminal like	-115.346	Other	other			58527	73112	685045
CKAP4	cytoskeleton associated protein 4	-115.36	Cytoplasm	other
MPLKIP	M-phase specific PLK1 interacting protein	-115.498	Nucleus	other
PARP1	poly(ADP-ribose) polymerase 1	-115.741	Nucleus	enzyme	diagnosis,efficacy,prognosis	2X-121,[18F]fluorthanatrace,ABT-767,bevacizumab/olaparib,CEP-9722,fluzoparib,IDX-1197,niraparib,olaparib,poly ADP ribose polymerase 1 inhibitor,rucaparib,SC10914,senaparib,simmiparib,talazoparib,veliparib
MAZ	MYC associated zinc finger protein	-115.914	Nucleus	transcription regulator
RANGRF	RAN guanine nucleotide release factor	-116.665	Nucleus	other
C6orf89	chromosome 6 open reading frame 89	-116.71	Cytoplasm	other
NOC4L	nucleolar complex associated 4 homolog	-116.729	Nucleus	other
TTC8	tetratricopeptide repeat domain 8	-117.273	Cytoplasm	other
REX1BD	required for excision 1-B domain containing	-117.45	Other	other
SELENOS	selenoprotein S	-117.526	Cytoplasm	other
TBRG1	transforming growth factor beta regulator 1	-117.775	Nucleus	other
NDRG3	NDRG family member 3	-117.896	Cytoplasm	other
UBE2V2	ubiquitin conjugating enzyme E2 V2	-118.034	Cytoplasm	enzyme
S1PR1	sphingosine-1-phosphate receptor 1	-118.72	Plasma Membrane	G-protein coupled receptor		fingolimod phosphate,ozanimod
CUL4A	cullin 4A	-119.408	Nucleus	other
FAM120C	family with sequence similarity 120C	-119.482	Other	other
EIF2B3	eukaryotic translation initiation factor 2B subunit gamma	-119.857	Cytoplasm	other
BAIAP2	BAR/IMD domain containing adaptor protein 2	-120.661	Plasma Membrane	kinase
SLC18B1	solute carrier family 18 member B1	-121.213	Other	other
CDC42EP2	CDC42 effector protein 2	-121.64	Plasma Membrane	other
CNTROB	centrobin, centriole duplication and spindle assembly protein	-121.701	Cytoplasm	other
DCBLD1	discoidin, CUB and LCCL domain containing 1	-121.955	Extracellular Space	other
RBM17	RNA binding motif protein 17	-122.07	Nucleus	other
MESD	mesoderm development LRP chaperone	-122.141	Extracellular Space	other
PKIA	cAMP-dependent protein kinase inhibitor alpha	-122.238	Cytoplasm	other
SNRPD1	small nuclear ribonucleoprotein D1 polypeptide	-122.476	Nucleus	other
PGRMC1	progesterone receptor membrane component 1	-122.851	Plasma Membrane	transmembrane receptor		CT1812
PIK3R2	phosphoinositide-3-kinase regulatory subunit 2	-123.106	Cytoplasm	kinase
SAMD9L	sterile alpha motif domain containing 9 like	-123.898	Extracellular Space	other
SMAP1	small ArfGAP 1	-124.242	Cytoplasm	other
EIF4E	eukaryotic translation initiation factor 4E	-124.411	Cytoplasm	translation regulator	prognosis	ISIS 183750
BZW2	basic leucine zipper and W2 domains 2	-124.687	Cytoplasm	translation regulator
GSTM5	glutathione S-transferase mu 5	-125.414	Cytoplasm	enzyme	diagnosis,prognosis
BCAP29	B cell receptor associated protein 29	-125.612	Cytoplasm	transporter
CHSY1	chondroitin sulfate synthase 1	-126.007	Cytoplasm	enzyme
COL5A1	collagen type V alpha 1 chain	-126.392	Extracellular Space	other		collagenase clostridium histolyticum
Zfp882	zinc finger protein 882	-126.616	Other	other
PHPT1	phosphohistidine phosphatase 1	-126.818	Cytoplasm	phosphatase
DNAJC10	DnaJ heat shock protein family (Hsp40) member C10	-127.521	Cytoplasm	enzyme
CDKN2D	cyclin dependent kinase inhibitor 2D	-127.582	Cytoplasm	transcription regulator
HRAS	HRas proto-oncogene, GTPase	-127.746	Plasma Membrane	enzyme	prognosis,safety	ISIS 2503
ZNF606	zinc finger protein 606	-127.785	Nucleus	transcription regulator
SLC38A6	solute carrier family 38 member 6	-127.872	Plasma Membrane	transporter	diagnosis
MRPL58	mitochondrial ribosomal protein L58	-127.975	Cytoplasm	enzyme
CAMK2G	calcium/calmodulin dependent protein kinase II gamma	-128.942	Cytoplasm	kinase
Snrpg	small nuclear ribonucleoprotein polypeptide G	-129.187	Nucleus	other
HDAC7	histone deacetylase 7	-129.692	Nucleus	transcription regulator		belinostat,pyroxamide,tributyrin
GTF3C6	general transcription factor IIIC subunit 6	-129.783	Nucleus	transcription regulator
STON1	stonin 1	-130.096	Plasma Membrane	other
PAK1	p21 (RAC1) activated kinase 1	-130.301	Cytoplasm	kinase		K-252
SRRT	serrate, RNA effector molecule	-130.542	Nucleus	other
ME1	malic enzyme 1	-130.572	Cytoplasm	enzyme
AGO1	argonaute RISC component 1	-131.047	Cytoplasm	translation regulator			26523	236511	313594
TVP23A	trans-golgi network vesicle protein 23 homolog A	-131.287	Other	other
ASIC1	acid sensing ion channel subunit 1	-132.135	Plasma Membrane	ion channel		amiloride,amiloride/hydrochlorothiazide,diclofenac,diclofenac/misoprostol,diclofenac/omeprazole
MAP3K20	mitogen-activated protein kinase kinase kinase 20	-132.16	Cytoplasm	kinase
CFAP69	cilia and flagella associated protein 69	-132.494	Cytoplasm	other
CCNB2	cyclin B2	-132.59	Cytoplasm	other
MED8	mediator complex subunit 8	-133.291	Nucleus	other
DDX50	DExD-box helicase 50	-133.664	Nucleus	enzyme
SUCLG1	succinate-CoA ligase GDP/ADP-forming subunit alpha	-133.862	Cytoplasm	enzyme
ACADSB	acyl-CoA dehydrogenase short/branched chain	-134.124	Cytoplasm	enzyme			36	66885	25618
DSE	dermatan sulfate epimerase	-135.06	Cytoplasm	enzyme
CNIH2	cornichon family AMPA receptor auxiliary protein 2	-135.346	Extracellular Space	other
TIMM17B	translocase of inner mitochondrial membrane 17B	-135.755	Cytoplasm	transporter
WDR82	WD repeat domain 82	-136	Nucleus	other
BCCIP	BRCA2 and CDKN1A interacting protein	-136.12	Nucleus	other
RABL6	RAB, member RAS oncogene family like 6	-136.164	Cytoplasm	other
YIPF5	Yip1 domain family member 5	-136.517	Cytoplasm	other
MCC	MCC regulator of WNT signaling pathway	-136.883	Cytoplasm	other
METRN	meteorin, glial cell differentiation regulator	-137.095	Extracellular Space	other
FRMD6	FERM domain containing 6	-137.234	Cytoplasm	other
QSOX1	quiescin sulfhydryl oxidase 1	-137.486	Cytoplasm	enzyme
SSU72	SSU72 homolog, RNA polymerase II CTD phosphatase	-137.712	Other	phosphatase
CCNYL1	cyclin Y like 1	-138.55	Plasma Membrane	other
RAD23B	RAD23 homolog B, nucleotide excision repair protein	-138.753	Nucleus	other
ANKRD46	ankyrin repeat domain 46	-138.91	Nucleus	transcription regulator
HDDC2	HD domain containing 2	-139.469	Cytoplasm	other
CCN4	cellular communication network factor 4	-139.807	Extracellular Space	other
CCN2	cellular communication network factor 2	-139.982	Extracellular Space	growth factor		FG-3019
AK3	adenylate kinase 3	-140.756	Cytoplasm	kinase			50808	56248	26956
ELP4	elongator acetyltransferase complex subunit 4	-141.237	Cytoplasm	other
NANS	N-acetylneuraminate synthase	-141.268	Cytoplasm	enzyme
ATF5	activating transcription factor 5	-141.547	Nucleus	transcription regulator
KDELR1	KDEL endoplasmic reticulum protein retention receptor 1	-142.281	Cytoplasm	transporter	unspecified application
P4HA3	prolyl 4-hydroxylase subunit alpha 3	-142.527	Cytoplasm	enzyme
SNX14	sorting nexin 14	-143.157	Cytoplasm	transporter
PDE4B	phosphodiesterase 4B	-143.428	Cytoplasm	enzyme		anagrelide,apremilast,arofylline,caffeine,caffeine/ergotamine,cilomilast,dipyridamole,dyphylline,enprofylline,ibudilast,ketotifen,L 869298,L-826,141,milrinone,papaverine,pentoxifylline,roflumilast,tetomilast,theophylline,tolbutamide
IFT57	intraflagellar transport 57	-143.493	Cytoplasm	other	disease progression
ISYNA1	inositol-3-phosphate synthase 1	-144.925	Cytoplasm	enzyme
IDS	iduronate 2-sulfatase	-144.978	Cytoplasm	enzyme
CCNC	cyclin C	-144.992	Nucleus	other
NEDD9	neural precursor cell expressed, developmentally down-regulated 9	-145.689	Nucleus	other
OLFML3	olfactomedin like 3	-145.861	Extracellular Space	other
RANGAP1	Ran GTPase activating protein 1	-146.047	Nucleus	other
PER3	period circadian regulator 3	-146.371	Nucleus	other
CIPC	CLOCK interacting pacemaker	-147.259	Nucleus	other
SUCLG2	succinate-CoA ligase GDP-forming subunit beta	-147.388	Cytoplasm	enzyme
ELAC2	elaC ribonuclease Z 2	-147.44	Nucleus	enzyme
PBK	PDZ binding kinase	-147.688	Cytoplasm	kinase
CAB39L	calcium binding protein 39 like	-149.46	Cytoplasm	kinase
APLP2	amyloid beta precursor like protein 2	-149.703	Cytoplasm	other
RPS27L	ribosomal protein S27 like	-149.823	Cytoplasm	translation regulator
SSRP1	structure specific recognition protein 1	-149.84	Nucleus	transcription regulator
S100A10	S100 calcium binding protein A10	-151.652	Cytoplasm	other
DEF8	differentially expressed in FDCP 8 homolog	-151.755	Other	other
DHX15	DEAH-box helicase 15	-152.419	Nucleus	enzyme
DLG4	discs large MAGUK scaffold protein 4	-152.971	Plasma Membrane	kinase	unspecified application
PARK7	Parkinsonism associated deglycase	-153.225	Nucleus	enzyme	diagnosis
FHDC1	FH2 domain containing 1	-153.914	Cytoplasm	other
ZC3H7B	zinc finger CCCH-type containing 7B	-154.182	Nucleus	other
GNE	glucosamine (UDP-N-acetyl)-2-epimerase/N-acetylmannosamine kinase	-155.822	Cytoplasm	kinase
TEX261	testis expressed 261	-156.868	Extracellular Space	other
NDUFS1	NADH:ubiquinone oxidoreductase core subunit S1	-157.952	Cytoplasm	enzyme
BCL9L	BCL9 like	-158.641	Cytoplasm	other
FBXO5	F-box protein 5	-159.89	Nucleus	enzyme
NDUFAB1	NADH:ubiquinone oxidoreductase subunit AB1	-161.668	Cytoplasm	enzyme
KIF11	kinesin family member 11	-162.269	Nucleus	other		4SC-205,ALN-VSP02,AZD4877,filanesib,ispinesib,litronesib,MK-0731,SB-743921
MZT1	mitotic spindle organizing protein 1	-163.065	Cytoplasm	other
S1PR3	sphingosine-1-phosphate receptor 3	-163.592	Plasma Membrane	G-protein coupled receptor		fingolimod phosphate
PPIL4	peptidylprolyl isomerase like 4	-163.77	Nucleus	enzyme
SUMO1	small ubiquitin like modifier 1	-164.878	Nucleus	enzyme
STXBP4	syntaxin binding protein 4	-165.194	Cytoplasm	other
EGR2	early growth response 2	-165.435	Nucleus	transcription regulator
UBE2E1	ubiquitin conjugating enzyme E2 E1	-165.474	Cytoplasm	enzyme
POLR2D	RNA polymerase II subunit D	-165.523	Nucleus	enzyme
ATP5MC2	ATP synthase membrane subunit c locus 2	-165.92	Cytoplasm	transporter
Ccl9	chemokine (C-C motif) ligand 9	-165.994	Extracellular Space	cytokine	unspecified application
TMEM64	transmembrane protein 64	-166.756	Cytoplasm	other
BAG1	BAG cochaperone 1	-167.084	Cytoplasm	other
PLAU	plasminogen activator, urokinase	-167.111	Extracellular Space	peptidase	disease progression,efficacy,prognosis
ZBED3	zinc finger BED-type containing 3	-169.342	Cytoplasm	transcription regulator
ISY1-RAB43	ISY1-RAB43 readthrough	-169.76	Nucleus	other
SEC24D	SEC24 homolog D, COPII coat complex component	-169.877	Cytoplasm	transporter
CASP6	caspase 6	-169.896	Cytoplasm	peptidase
SEPTIN6	septin 6	-170.229	Cytoplasm	other
SERPINB9	serpin family B member 9	-170.278	Cytoplasm	other
ISOC1	isochorismatase domain containing 1	-171.287	Cytoplasm	enzyme	unspecified application
MSI2	musashi RNA binding protein 2	-171.95	Cytoplasm	other
VPS36	vacuolar protein sorting 36 homolog	-172.73	Cytoplasm	other
RGS3	regulator of G protein signaling 3	-174.011	Nucleus	enzyme
TMED2	transmembrane p24 trafficking protein 2	-174.115	Cytoplasm	transporter
NFIC	nuclear factor I C	-174.148	Nucleus	transcription regulator
TOMM7	translocase of outer mitochondrial membrane 7	-175.624	Cytoplasm	transporter
POLR2F	RNA polymerase II subunit F	-176.497	Nucleus	enzyme
SLC35A4	solute carrier family 35 member A4	-176.637	Cytoplasm	transporter
SELENOW	selenoprotein W	-176.702	Cytoplasm	enzyme
Ccl2	chemokine (C-C motif) ligand 2	-176.718	Extracellular Space	cytokine	unspecified application
SMIM7	small integral membrane protein 7	-177.353	Other	other
MAGED2	MAGE family member D2	-180.947	Plasma Membrane	other
MLF2	myeloid leukemia factor 2	-181.402	Nucleus	other
ST3GAL3	ST3 beta-galactoside alpha-2,3-sialyltransferase 3	-182.604	Cytoplasm	enzyme
PJA2	praja ring finger ubiquitin ligase 2	-182.771	Cytoplasm	enzyme
OSTC	oligosaccharyltransferase complex non-catalytic subunit	-182.83	Cytoplasm	enzyme
CENPW	centromere protein W	-184.096	Nucleus	other
SMO	smoothened, frizzled class receptor	-184.667	Plasma Membrane	G-protein coupled receptor	response to therapy	BMS-833923,erismodegib,erlotinib/vismodegib,gemcitabine/vismodegib,glasdegib,NVP-LEQ-506,saridegib,TAK-441,taladegib,vismodegib,ZSP1602
SRP68	signal recognition particle 68	-185.18	Nucleus	other
SAMHD1	SAM and HD domain containing deoxynucleoside triphosphate triphosphohydrolase 1	-185.916	Nucleus	enzyme
GNA12	G protein subunit alpha 12	-186.098	Plasma Membrane	enzyme	response to therapy
EIF2AK2	eukaryotic translation initiation factor 2 alpha kinase 2	-186.174	Cytoplasm	kinase		mitapivat
Gm9833	myelin basic protein expression factor 2, repressor pseudogene	-186.918	Other	other
NOP16	NOP16 nucleolar protein	-187.158	Nucleus	other
PSMC4	proteasome 26S subunit, ATPase 4	-187.365	Nucleus	peptidase
LUC7L2	LUC7 like 2, pre-mRNA splicing factor	-187.464	Nucleus	other
EPB41L2	erythrocyte membrane protein band 4.1 like 2	-187.523	Plasma Membrane	other
Nbdy	negative regulator of P-body association	-187.871	Other	other
AMMECR1	AMMECR nuclear protein 1	-189.6	Nucleus	other
MRPL10	mitochondrial ribosomal protein L10	-192.489	Cytoplasm	other
Rpl22l1	ribosomal protein L22 like 1	-193.354	Other	other
SIX4	SIX homeobox 4	-193.636	Nucleus	transcription regulator
MRPS28	mitochondrial ribosomal protein S28	-194.813	Cytoplasm	other
VBP1	VHL binding protein 1	-196.758	Cytoplasm	other	unspecified application
ATOH8	atonal bHLH transcription factor 8	-196.917	Nucleus	transcription regulator
METTL16	methyltransferase like 16	-197.231	Nucleus	enzyme
Gm773	predicted gene 773	-197.604	Other	other
STAU1	staufen double-stranded RNA binding protein 1	-197.757	Cytoplasm	transporter
SOD2	superoxide dismutase 2	-197.95	Cytoplasm	enzyme	diagnosis,unspecified application
SCOC	short coiled-coil protein	-198.742	Cytoplasm	other
GLIPR2	GLI pathogenesis related 2	-199.614	Cytoplasm	other
LXN	latexin	-200.664	Cytoplasm	other
CDC26	cell division cycle 26	-201.072	Nucleus	other
TGFBR2	transforming growth factor beta receptor 2	-203.284	Plasma Membrane	kinase		IMC-TR1
NIPSNAP2	nipsnap homolog 2	-205.056	Plasma Membrane	other
HIF1AN	hypoxia inducible factor 1 subunit alpha inhibitor	-205.404	Nucleus	enzyme
GSTM1	glutathione S-transferase mu 1	-205.478	Cytoplasm	enzyme	diagnosis,efficacy,safety,unspecified application
CTNNBIP1	catenin beta interacting protein 1	-205.492	Cytoplasm	other
TRIP12	thyroid hormone receptor interactor 12	-205.612	Cytoplasm	enzyme
GINS2	GINS complex subunit 2	-205.653	Nucleus	other
PDXK	pyridoxal kinase	-205.849	Cytoplasm	kinase
NRP1	neuropilin 1	-205.882	Plasma Membrane	transmembrane receptor	diagnosis,efficacy	vesencumab
AURKA	aurora kinase A	-206.202	Nucleus	kinase	efficacy	alisertib,AMG 900,AT-9283,CYC 116,danusertib,ilorasertib,MK 5108,MLN8054,SNS 314,TAS-119,tozasertib,TTP607
MRC2	mannose receptor C type 2	-206.798	Plasma Membrane	transmembrane receptor
MAGI3	membrane associated guanylate kinase, WW and PDZ domain containing 3	-208.436	Cytoplasm	kinase
AHSA1	activator of HSP90 ATPase activity 1	-208.579	Cytoplasm	other			10598	217737	681996
TCF4	transcription factor 4	-208.689	Nucleus	transcription regulator
E2F5	E2F transcription factor 5	-209.465	Nucleus	transcription regulator
SVEP1	sushi, von Willebrand factor type A, EGF and pentraxin domain containing 1	-209.642	Cytoplasm	other
FAM120A	family with sequence similarity 120A	-210.24	Cytoplasm	other
ASF1B	anti-silencing function 1B histone chaperone	-210.795	Nucleus	other
CYB5A	cytochrome b5 type A	-211.264	Cytoplasm	enzyme
FAM216A	family with sequence similarity 216 member A	-211.693	Other	other
LRPAP1	LDL receptor related protein associated protein 1	-212.617	Plasma Membrane	other
MYLIP	myosin regulatory light chain interacting protein	-212.75	Cytoplasm	enzyme
ECI2	enoyl-CoA delta isomerase 2	-213.431	Cytoplasm	enzyme
PSMD14	proteasome 26S subunit, non-ATPase 14	-215.589	Cytoplasm	peptidase
INHBA	inhibin subunit beta A	-217.045	Extracellular Space	growth factor	diagnosis	activin type 2B receptor Fc fusion protein STM 343,garetosmab
MECOM	MDS1 and EVI1 complex locus	-217.205	Nucleus	transcription regulator	prognosis
CKAP5	cytoskeleton associated protein 5	-217.739	Nucleus	transcription regulator
HMGB2	high mobility group box 2	-218.667	Nucleus	transcription regulator	unspecified application
TMLHE	trimethyllysine hydroxylase, epsilon	-219.087	Cytoplasm	enzyme
FAM107B	family with sequence similarity 107 member B	-219.683	Other	other
ISCU	iron-sulfur cluster assembly enzyme	-219.988	Cytoplasm	other
MRPL18	mitochondrial ribosomal protein L18	-220.361	Cytoplasm	translation regulator
DNLZ	DNL-type zinc finger	-221.142	Cytoplasm	other
FKBP1A	FKBP prolyl isomerase 1A	-222.427	Cytoplasm	enzyme	unspecified application	cyclosporine A/sirolimus/tacrolimus,cyclosporine A/tacrolimus,everolimus,everolimus/exemestane,everolimus/fulvestrant,everolimus/gefitinib,everolimus/lenvatinib,everolimus/letrozole,everolimus/paclitaxel,everolimus/panobinostat,everolimus/pasireotide,everolimus/ribociclib,everolimus/sorafenib,everolimus/tamoxifen,everolimus/vandetanib,imatinib/sirolimus,lenalidomide/temsirolimus,methotrexate/siro…
DLX2	distal-less homeobox 2	-222.537	Nucleus	transcription regulator
LGR4	leucine rich repeat containing G protein-coupled receptor 4	-223.55	Plasma Membrane	transmembrane receptor
MBD3	methyl-CpG binding domain protein 3	-224.48	Nucleus	other
GLRX2	glutaredoxin 2	-225.126	Cytoplasm	enzyme	safety
CUL7	cullin 7	-225.618	Cytoplasm	enzyme
LRP11	LDL receptor related protein 11	-226.887	Other	other
PRKAR2B	protein kinase cAMP-dependent type II regulatory subunit beta	-227.12	Cytoplasm	kinase
MACROH2A2	macroH2A.2 histone	-227.34	Nucleus	other
NPLOC4	NPL4 homolog, ubiquitin recognition factor	-229.237	Nucleus	other
COPZ1	COPI coat complex subunit zeta 1	-229.77	Cytoplasm	transporter
GLO1	glyoxalase I	-230.025	Cytoplasm	enzyme
PMPCA	peptidase, mitochondrial processing subunit alpha	-230.038	Cytoplasm	peptidase
LSM6	LSM6 homolog, U6 small nuclear RNA and mRNA degradation associated	-231.465	Nucleus	other
PPIH	peptidylprolyl isomerase H	-231.577	Nucleus	enzyme
FKBP4	FKBP prolyl isomerase 4	-231.74	Nucleus	enzyme
PSMD6	proteasome 26S subunit, non-ATPase 6	-232.594	Cytoplasm	enzyme
ERI3	ERI1 exoribonuclease family member 3	-233.075	Plasma Membrane	other
SPIRE1	spire type actin nucleation factor 1	-233.515	Cytoplasm	other
RCN3	reticulocalbin 3	-233.565	Cytoplasm	other
PLPPR2	phospholipid phosphatase related 2	-233.742	Other	phosphatase
H2AC21	H2A clustered histone 21	-234.334	Nucleus	other
GOLM2	golgi membrane protein 2	-234.374	Cytoplasm	other
NEK6	NIMA related kinase 6	-236.304	Nucleus	kinase
LSM4	LSM4 homolog, U6 small nuclear RNA and mRNA degradation associated	-237.067	Nucleus	other
AKR1A1	aldo-keto reductase family 1 member A1	-237.486	Cytoplasm	enzyme		aldose reductase inhibitor	10327	58810	78959
FARP2	FERM, ARH/RhoGEF and pleckstrin domain protein 2	-237.956	Cytoplasm	other
NUF2	NUF2 component of NDC80 kinetochore complex	-239.737	Nucleus	other
BMT2	base methyltransferase of 25S rRNA 2 homolog	-243.009	Other	other
SSBP1	single stranded DNA binding protein 1	-244.279	Cytoplasm	other
TBC1D19	TBC1 domain family member 19	-244.359	Other	other
KAT2A	lysine acetyltransferase 2A	-245.548	Cytoplasm	enzyme
PDGFC	platelet derived growth factor C	-245.984	Extracellular Space	growth factor
NOP58	NOP58 ribonucleoprotein	-246.277	Nucleus	enzyme
CAPRIN1	cell cycle associated protein 1	-247.658	Plasma Membrane	other
TIMM23	translocase of inner mitochondrial membrane 23	-249.019	Cytoplasm	transporter
CDCA3	cell division cycle associated 3	-250.214	Cytoplasm	other
ADAMTS2	ADAM metallopeptidase with thrombospondin type 1 motif 2	-251.196	Extracellular Space	peptidase	diagnosis,efficacy		9509	216725	287899
SWI5	SWI5 homologous recombination repair protein	-251.902	Nucleus	other
UBE2I	ubiquitin conjugating enzyme E2 I	-252.483	Nucleus	enzyme	disease progression
CCNE1	cyclin E1	-253.675	Nucleus	transcription regulator
ARRDC3	arrestin domain containing 3	-253.941	Plasma Membrane	other
ZNF326	zinc finger protein 326	-254.23	Nucleus	transcription regulator
BBX	BBX high mobility group box domain containing	-256.152	Nucleus	transcription regulator
GLTP	glycolipid transfer protein	-257.854	Cytoplasm	transporter
Srrm1	serine/arginine repetitive matrix 1	-258.979	Nucleus	other
NOL11	nucleolar protein 11	-261.51	Nucleus	other
ZDHHC4	zinc finger DHHC-type palmitoyltransferase 4	-261.774	Cytoplasm	other
Tpm2	tropomyosin 2, beta	-263.002	Cytoplasm	other
PSMD2	proteasome 26S subunit, non-ATPase 2	-263.135	Cytoplasm	other		bortezomib,bortezomib/cladribine/rituximab,bortezomib/dexamethasone,bortezomib/dexamethasone/doxorubicin,bortezomib/dexamethasone/lenalidomide,bortezomib/dexamethasone/pomalidomide,bortezomib/dexamethasone/rituximab,bortezomib/dexamethasone/thalidomide,bortezomib/doxorubicin,bortezomib/fulvestrant,bortezomib/lenalidomide,bortezomib/paclitaxel,bortezomib/prednisone,bortezomib/rituximab,bortezomib/…
DDAH1	dimethylarginine dimethylaminohydrolase 1	-263.852	Cytoplasm	enzyme
CPSF6	cleavage and polyadenylation specific factor 6	-264.091	Nucleus	other
NDUFA10	NADH:ubiquinone oxidoreductase subunit A10	-264.772	Cytoplasm	transporter
CASD1	CAS1 domain containing 1	-264.811	Cytoplasm	enzyme
NAB2	NGFI-A binding protein 2	-265.11	Nucleus	transcription regulator
FKBP3	FKBP prolyl isomerase 3	-265.855	Nucleus	enzyme
C19orf53	chromosome 19 open reading frame 53	-266.38	Nucleus	other
CDC123	cell division cycle 123	-268.67	Cytoplasm	other
Alyref	Aly/REF export factor	-269.101	Nucleus	other
TSPAN9	tetraspanin 9	-270.237	Plasma Membrane	other
MRPL30	mitochondrial ribosomal protein L30	-272.916	Cytoplasm	other
FABP5	fatty acid binding protein 5	-276.627	Cytoplasm	transporter	disease progression
AP3M1	adaptor related protein complex 3 subunit mu 1	-277.301	Cytoplasm	transporter
CCM2	CCM2 scaffold protein	-279.798	Cytoplasm	other
Ndufs5	NADH:ubiquinone oxidoreductase core subunit S5	-280.069	Cytoplasm	other
HEATR3	HEAT repeat containing 3	-280.77	Other	other
RFK	riboflavin kinase	-281.346	Cytoplasm	kinase
CD151	CD151 molecule (Raph blood group)	-284.382	Plasma Membrane	other
MPHOSPH6	M-phase phosphoprotein 6	-284.466	Nucleus	other
HIBADH	3-hydroxyisobutyrate dehydrogenase	-285.168	Cytoplasm	enzyme
H2BC17	H2B clustered histone 17	-285.624	Nucleus	other
GPS1	G protein pathway suppressor 1	-285.973	Nucleus	other
COPB2	COPI coat complex subunit beta 2	-286.477	Cytoplasm	transporter
ADSL	adenylosuccinate lyase	-286.536	Cytoplasm	enzyme			158	11564	315150
PDAP1	PDGFA associated protein 1	-286.82	Cytoplasm	other
Spg20	spastic paraplegia 20, spartin (Troyer syndrome) homolog (human)	-287.235	Plasma Membrane	other
ZFP36L1	ZFP36 ring finger protein like 1	-287.242	Nucleus	transcription regulator
CFL1	cofilin 1	-287.516	Nucleus	other
CRIM1	cysteine rich transmembrane BMP regulator 1	-289.982	Extracellular Space	kinase	unspecified application
ERGIC1	endoplasmic reticulum-golgi intermediate compartment 1	-291.197	Cytoplasm	other
Lage3	L antigen family, member 3	-292.017	Nucleus	other
USP14	ubiquitin specific peptidase 14	-292.019	Cytoplasm	peptidase		VLX1570
CDON	cell adhesion associated, oncogene regulated	-293.255	Plasma Membrane	other
THYN1	thymocyte nuclear protein 1	-294.166	Nucleus	other
DUSP6	dual specificity phosphatase 6	-294.835	Cytoplasm	phosphatase	diagnosis
TESK1	testis associated actin remodelling kinase 1	-297.848	Nucleus	kinase
SDHC	succinate dehydrogenase complex subunit C	-298.047	Cytoplasm	enzyme
JADE1	jade family PHD finger 1	-299.49	Nucleus	transcription regulator
EVL	Enah/Vasp-like	-302.25	Plasma Membrane	other
SEPTIN2	septin 2	-303.269	Cytoplasm	enzyme
PPID	peptidylprolyl isomerase D	-304.195	Cytoplasm	enzyme
CCDC34	coiled-coil domain containing 34	-304.418	Other	other
GBF1	golgi brefeldin A resistant guanine nucleotide exchange factor 1	-306.038	Cytoplasm	other
NXT2	nuclear transport factor 2 like export factor 2	-307.877	Nucleus	transporter
PWWP3B	PWWP domain containing 3B	-308.369	Cytoplasm	other
MRPS14	mitochondrial ribosomal protein S14	-309.04	Cytoplasm	other
CIBAR1	CBY1 interacting BAR domain containing 1	-310.38	Cytoplasm	other
PRKCI	protein kinase C iota	-312.047	Cytoplasm	kinase	unspecified application	ingenol mebutate
ARF5	ADP ribosylation factor 5	-312.083	Cytoplasm	enzyme
H2BC4	H2B clustered histone 4	-312.861	Nucleus	other
PSMB4	proteasome 20S subunit beta 4	-313.268	Cytoplasm	peptidase
HSD17B10	hydroxysteroid 17-beta dehydrogenase 10	-313.841	Cytoplasm	enzyme
R3HDM1	R3H domain containing 1	-315.23	Other	other
PCDH18	protocadherin 18	-315.663	Extracellular Space	other
POLE3	DNA polymerase epsilon 3, accessory subunit	-316.233	Nucleus	enzyme		bortezomib/cladribine/rituximab,cladribine,cladribine/cytarabine/daunorubicin,cladribine/cytarabine/decitabine,cladribine/cytarabine/filgrastim,cladribine/cytarabine/filgrastim/idarubicin,cladribine/cytarabine/filgrastim/idarubicin/plerixafor,cladribine/cytarabine/filgrastim/mitoxantrone,cladribine/peginterferon alfa-2a,cladribine/recombinant interferon,cladribine/rituximab
H1f1	H1.1 linker histone, cluster member	-316.542	Nucleus	other
MOV10	Mov10 RISC complex RNA helicase	-317.601	Nucleus	enzyme
SKA2	spindle and kinetochore associated complex subunit 2	-319.577	Nucleus	other
LSM7	LSM7 homolog, U6 small nuclear RNA and mRNA degradation associated	-321.425	Nucleus	other
HMMR	hyaluronan mediated motility receptor	-323.435	Plasma Membrane	transmembrane receptor
SF3B1	splicing factor 3b subunit 1	-323.488	Nucleus	other		H3B-8800
MAD2L1	mitotic arrest deficient 2 like 1	-324.315	Nucleus	other
FBL	fibrillarin	-327.024	Nucleus	enzyme
MYCBP	MYC binding protein	-327.46	Nucleus	transcription regulator
UBA1	ubiquitin like modifier activating enzyme 1	-327.862	Cytoplasm	enzyme		MLN7243
MARVELD1	MARVEL domain containing 1	-328.579	Other	other
KLHL22	kelch like family member 22	-329.048	Cytoplasm	other
ZC2HC1A	zinc finger C2HC-type containing 1A	-330.76	Other	other
HJURP	Holliday junction recognition protein	-331.884	Nucleus	other
Hmgn3	high mobility group nucleosomal binding domain 3	-333.928	Nucleus	other
ACO2	aconitase 2	-334.814	Cytoplasm	enzyme			50	11429	79250
DNAJC19	DnaJ heat shock protein family (Hsp40) member C19	-337.407	Cytoplasm	other
CSNK1A1	casein kinase 1 alpha 1	-337.689	Cytoplasm	kinase
IGF1	insulin like growth factor 1	-338.797	Extracellular Space	growth factor	diagnosis,efficacy,prognosis,safety	BI 836845,MEDI-573
PSMD13	proteasome 26S subunit, non-ATPase 13	-340.562	Cytoplasm	peptidase
Chtop	chromatin target of PRMT1	-341.476	Nucleus	other
MT-ND6	NADH dehydrogenase, subunit 6 (complex I)	-342.311	Cytoplasm	enzyme
METAP2	methionyl aminopeptidase 2	-347.501	Cytoplasm	peptidase	unspecified application	beloranib,M8891,nitroxoline,O-(chloroacetylcarbamoyl)fumagillol,PPI-2458,SDX-7320,XMT-1107
BUB3	BUB3 mitotic checkpoint protein	-347.737	Nucleus	other
WDR18	WD repeat domain 18	-348.086	Nucleus	other
CCT6A	chaperonin containing TCP1 subunit 6A	-349.118	Cytoplasm	other
PSMC2	proteasome 26S subunit, ATPase 2	-349.938	Nucleus	peptidase
RGMA	repulsive guidance molecule BMP co-receptor a	-352.988	Plasma Membrane	other
DCTD	dCMP deaminase	-355.175	Cytoplasm	enzyme		tetrahydrouridine
PPIC	peptidylprolyl isomerase C	-357.48	Cytoplasm	enzyme
MAGOH	mago homolog, exon junction complex subunit	-359.626	Nucleus	other
TRIM24	tripartite motif containing 24	-360.461	Nucleus	transcription regulator
SDC2	syndecan 2	-360.743	Plasma Membrane	other
TSC22D2	TSC22 domain family member 2	-361.025	Nucleus	transcription regulator
CENPM	centromere protein M	-362.095	Cytoplasm	other
ASNSD1	asparagine synthetase domain containing 1	-363.263	Other	enzyme
MED14	mediator complex subunit 14	-365.069	Nucleus	transcription regulator
SURF4	surfeit 4	-365.788	Cytoplasm	other
NFYC	nuclear transcription factor Y subunit gamma	-367.92	Nucleus	transcription regulator
NDUFB6	NADH:ubiquinone oxidoreductase subunit B6	-369.502	Cytoplasm	enzyme
ENTPD7	ectonucleoside triphosphate diphosphohydrolase 7	-370.445	Cytoplasm	enzyme
CALU	calumenin	-370.865	Cytoplasm	other
C11orf98	chromosome 11 open reading frame 98	-371.63	Other	other
TAF9	TATA-box binding protein associated factor 9	-371.997	Nucleus	transcription regulator
ABLIM1	actin binding LIM protein 1	-372.411	Cytoplasm	other			3983	226251	307989
TSPAN4	tetraspanin 4	-373.307	Plasma Membrane	other
CNOT7	CCR4-NOT transcription complex subunit 7	-382.314	Nucleus	transcription regulator
SFPQ	splicing factor proline and glutamine rich	-383.154	Nucleus	other
NDUFA8	NADH:ubiquinone oxidoreductase subunit A8	-383.239	Cytoplasm	enzyme
LMNA	lamin A/C	-388.428	Nucleus	other
ADAM22	ADAM metallopeptidase domain 22	-390.948	Plasma Membrane	peptidase			53616	11496
DROSHA	drosha ribonuclease III	-391.215	Nucleus	enzyme
NDUFV2	NADH:ubiquinone oxidoreductase core subunit V2	-391.611	Cytoplasm	enzyme
DDX6	DEAD-box helicase 6	-392.175	Nucleus	enzyme
SLC25A12	solute carrier family 25 member 12	-393.315	Cytoplasm	transporter
SERPINB1	serpin family B member 1	-396.031	Cytoplasm	other
BZW1	basic leucine zipper and W2 domains 1	-397.473	Cytoplasm	translation regulator
PGAM1	phosphoglycerate mutase 1	-401.036	Cytoplasm	phosphatase
ZFP36L2	ZFP36 ring finger protein like 2	-401.109	Nucleus	transcription regulator	unspecified application
PHB2	prohibitin 2	-402.569	Cytoplasm	transcription regulator
GAS1	growth arrest specific 1	-402.817	Plasma Membrane	other
NAA38	N-alpha-acetyltransferase 38, NatC auxiliary subunit	-402.913	Nucleus	other
RBM8A	RNA binding motif protein 8A	-405.642	Nucleus	other
SPCS3	signal peptidase complex subunit 3	-408.912	Cytoplasm	peptidase
TCP1	t-complex 1	-409.778	Cytoplasm	other
NDUFB4	NADH:ubiquinone oxidoreductase subunit B4	-409.958	Cytoplasm	transporter
CRTAP	cartilage associated protein	-416.661	Extracellular Space	other
DDOST	dolichyl-diphosphooligosaccharide--protein glycosyltransferase non-catalytic subunit	-421.862	Cytoplasm	enzyme
AP2M1	adaptor related protein complex 2 subunit mu 1	-432.676	Cytoplasm	other
LYAR	Ly1 antibody reactive	-435.817	Plasma Membrane	other
AK1	adenylate kinase 1	-438.057	Cytoplasm	kinase	unspecified application		203	11636	24183
PSMA1	proteasome 20S subunit alpha 1	-440.767	Cytoplasm	peptidase
UBE2M	ubiquitin conjugating enzyme E2 M	-442.281	Cytoplasm	enzyme
P4HA1	prolyl 4-hydroxylase subunit alpha 1	-442.338	Cytoplasm	enzyme	unspecified application
MYL6	myosin light chain 6	-444.004	Cytoplasm	enzyme
SERP1	stress associated endoplasmic reticulum protein 1	-446.798	Cytoplasm	other
S100A6	S100 calcium binding protein A6	-447.614	Cytoplasm	transporter	diagnosis,unspecified application
SRM	spermidine synthase	-448.869	Cytoplasm	enzyme
CENPA	centromere protein A	-450.963	Nucleus	other
CCND1	cyclin D1	-453.382	Nucleus	transcription regulator	diagnosis,efficacy,prognosis,response to therapy,unspecified application	arsenic trioxide,arsenic trioxide/cytarabine/methotrexate,arsenic trioxide/daunorubicin/tretinoin,arsenic trioxide/gemtuzumab ozogamicin/tretinoin,arsenic trioxide/idarubicin/tretinoin,arsenic trioxide/tretinoin
NT5DC2	5'-nucleotidase domain containing 2	-455.112	Cytoplasm	other
RUVBL1	RuvB like AAA ATPase 1	-455.782	Nucleus	transcription regulator
SSR1	signal sequence receptor subunit 1	-460.148	Cytoplasm	other
NPR3	natriuretic peptide receptor 3	-465.005	Plasma Membrane	G-protein coupled receptor		nesiritide
COPZ2	COPI coat complex subunit zeta 2	-466.027	Cytoplasm	transporter
H2BC3	H2B clustered histone 3	-468.637	Nucleus	other
H3C15	H3 clustered histone 15	-471.342	Nucleus	other
BANF1	BAF nuclear assembly factor 1	-472.639	Nucleus	other
AHCY	adenosylhomocysteinase	-476.215	Cytoplasm	enzyme	unspecified application	3-deazaaristeromycin,3-deazaneplanocin,6'-C-methylneplanocin A,9-(2',3'-dihydroxycyclopent-4'-enyl)adenine,cyanovirin-N,neplanocin A	191	269378	29443
PCLAF	PCNA clamp associated factor	-476.524	Nucleus	other
DYNLT1	dynein light chain Tctex-type 1	-476.78	Cytoplasm	other
LRRCC1	leucine rich repeat and coiled-coil centrosomal protein 1	-480.615	Nucleus	transporter
PRDX1	peroxiredoxin 1	-482.234	Cytoplasm	enzyme	diagnosis
EIF4G2	eukaryotic translation initiation factor 4 gamma 2	-487.229	Cytoplasm	translation regulator
Pisd-ps3	phosphatidylserine decarboxylase, pseudogene 3	-487.342	Other	other
VCP	valosin containing protein	-487.369	Cytoplasm	enzyme		CB-5083,CB-5339
TOMM22	translocase of outer mitochondrial membrane 22	-487.76	Cytoplasm	transporter
TRA2B	transformer 2 beta homolog	-491.242	Nucleus	other
OGN	osteoglycin	-494.024	Extracellular Space	growth factor
RPL3	ribosomal protein L3	-495.13	Nucleus	other		cytarabine/daunorubicin/omacetaxine mepesuccinate,cytarabine/doxorubicin/filgrastim/omacetaxine mepesuccinate,omacetaxine mepesuccinate
TRA2A	transformer 2 alpha homolog	-497.116	Nucleus	other
LPAR1	lysophosphatidic acid receptor 1	-498.471	Plasma Membrane	G-protein coupled receptor
VCAM1	vascular cell adhesion molecule 1	-502.566	Plasma Membrane	transmembrane receptor	diagnosis,disease progression,efficacy,prognosis,unspecified application
ID1	inhibitor of DNA binding 1, HLH protein	-503.289	Nucleus	transcription regulator	disease progression
PSMD3	proteasome 26S subunit, non-ATPase 3	-503.822	Cytoplasm	other
H4C6	H4 clustered histone 6	-506.868	Nucleus	other
PRDX2	peroxiredoxin 2	-508.214	Cytoplasm	enzyme
CISD1	CDGSH iron sulfur domain 1	-510.205	Cytoplasm	other
SKP2	S-phase kinase associated protein 2	-510.604	Nucleus	other	diagnosis
Marcks	myristoylated alanine rich protein kinase C substrate	-515.439	Plasma Membrane	other
ID2	inhibitor of DNA binding 2	-515.787	Nucleus	transcription regulator
RAN	RAN, member RAS oncogene family	-520.541	Nucleus	enzyme
TUBB4B	tubulin beta 4B class IVb	-520.631	Cytoplasm	other	unspecified application	6-mercaptopurine/vincristine,ABT-751,bevacizumab/docetaxel,bevacizumab/docetaxel/prednisone/thalidomide/zoledronic acid,bevacizumab/paclitaxel,bevacizumab/paclitaxel/pemetrexed,bevacizumab/paclitaxel/topotecan,BMS-275183,capecitabine/docetaxel,capecitabine/docetaxel/gemcitabine,capecitabine/docetaxel/oxaliplatin/trastuzumab,cevipabulin,colchicine,colchicine/probenecid,cyclophosphamide/daunorubici…
CCT8	chaperonin containing TCP1 subunit 8	-522.366	Cytoplasm	enzyme
CD248	CD248 molecule	-525.068	Plasma Membrane	other		ontuxizumab
TCF7L2	transcription factor 7 like 2	-530.706	Nucleus	transcription regulator	efficacy
HNRNPAB	heterogeneous nuclear ribonucleoprotein A/B	-531.136	Nucleus	enzyme
ASPH	aspartate beta-hydroxylase	-531.958	Cytoplasm	enzyme
FBLN2	fibulin 2	-537.63	Extracellular Space	other
ARMCX2	armadillo repeat containing X-linked 2	-548.155	Other	other
PDIA3	protein disulfide isomerase family A member 3	-549.245	Cytoplasm	peptidase	diagnosis
CELF2	CUGBP Elav-like family member 2	-557.258	Nucleus	other	safety
HSPH1	heat shock protein family H (Hsp110) member 1	-558.532	Cytoplasm	other
Calm1 (includes others)	calmodulin 1	-560.191	Nucleus	other
LIMS1	LIM zinc finger domain containing 1	-560.356	Plasma Membrane	other
AMOTL2	angiomotin like 2	-564.115	Plasma Membrane	other
CSDE1	cold shock domain containing E1	-569.137	Cytoplasm	enzyme
ATP5MC3	ATP synthase membrane subunit c locus 3	-569.459	Cytoplasm	transporter
ADAMTS5	ADAM metallopeptidase with thrombospondin type 1 motif 5	-571.785	Extracellular Space	peptidase		M6495	11096	23794	304135
ATP5F1C	ATP synthase F1 subunit gamma	-572.22	Cytoplasm	transporter
SNAI2	snail family transcriptional repressor 2	-574.726	Nucleus	transcription regulator
H4C9	H4 clustered histone 9	-575.191	Nucleus	other
ODC1	ornithine decarboxylase 1	-577.149	Cytoplasm	enzyme	efficacy	eflornithine,tazarotene
CNN2	calponin 2	-578.093	Cytoplasm	other
HDAC1	histone deacetylase 1	-579.145	Nucleus	transcription regulator	efficacy	belinostat,bortezomib/vorinostat,domatinostat,HDAC class I inhibitors,mocetinostat,OKI-179,pyroxamide,R 306465,trametinib/vorinostat,tributyrin,vorinostat
MKI67	marker of proliferation Ki-67	-586.178	Nucleus	other	diagnosis,disease progression,efficacy,prognosis,response to therapy,unspecified application
ATP5F1A	ATP synthase F1 subunit alpha	-591.29	Cytoplasm	transporter
H3C13	H3 clustered histone 13	-597.527	Nucleus	other
GCSH	glycine cleavage system protein H	-597.676	Cytoplasm	enzyme
F2R	coagulation factor II thrombin receptor	-603.758	Plasma Membrane	G-protein coupled receptor	disease progression	argatroban,bivalirudin,chrysalin,PAR1 inhibitor,vorapaxar
LIMA1	LIM domain and actin binding 1	-605.101	Cytoplasm	other
H4C11	H4 clustered histone 11	-612.76	Nucleus	other
PSMD1	proteasome 26S subunit, non-ATPase 1	-613.646	Cytoplasm	other		bortezomib,bortezomib/cladribine/rituximab,bortezomib/dexamethasone,bortezomib/dexamethasone/doxorubicin,bortezomib/dexamethasone/lenalidomide,bortezomib/dexamethasone/pomalidomide,bortezomib/dexamethasone/rituximab,bortezomib/dexamethasone/thalidomide,bortezomib/doxorubicin,bortezomib/fulvestrant,bortezomib/lenalidomide,bortezomib/paclitaxel,bortezomib/prednisone,bortezomib/rituximab,bortezomib/…
LOXL3	lysyl oxidase like 3	-615.864	Extracellular Space	enzyme
Cox7c	cytochrome c oxidase subunit 7C	-624.891	Cytoplasm	other
HNRNPA2B1	heterogeneous nuclear ribonucleoprotein A2/B1	-626.318	Nucleus	other
APCDD1	APC down-regulated 1	-626.852	Plasma Membrane	other
TIMP3	TIMP metallopeptidase inhibitor 3	-631.88	Extracellular Space	other	diagnosis,prognosis,unspecified application
FOSB	FosB proto-oncogene, AP-1 transcription factor subunit	-632.912	Nucleus	transcription regulator
Tpm1	tropomyosin 1, alpha	-633.089	Plasma Membrane	other
H2BC14	H2B clustered histone 14	-649.849	Nucleus	other
KMT5A	lysine methyltransferase 5A	-655.018	Nucleus	enzyme
CYP2C18	cytochrome P450 family 2 subfamily C member 18	-662.3	Cytoplasm	enzyme
NME1	NME/NM23 nucleoside diphosphate kinase 1	-662.434	Cytoplasm	kinase	unspecified application
AHCYL1	adenosylhomocysteinase like 1	-664.708	Cytoplasm	enzyme	unspecified application		10768	229709	362013
SLC25A5	solute carrier family 25 member 5	-669.817	Cytoplasm	transporter		clodronic acid
UQCRB	ubiquinol-cytochrome c reductase binding protein	-674.968	Cytoplasm	enzyme
PPA1	inorganic pyrophosphatase 1	-677.864	Cytoplasm	enzyme
CXCL12	C-X-C motif chemokine ligand 12	-678.874	Extracellular Space	cytokine	diagnosis,efficacy,prognosis,unspecified application	NOX-A12
SNRPD2	small nuclear ribonucleoprotein D2 polypeptide	-691.54	Nucleus	other
H2BC12	H2B clustered histone 12	-719.899	Nucleus	other
ATP5MC1	ATP synthase membrane subunit c locus 1	-721.124	Cytoplasm	transporter
NUTF2	nuclear transport factor 2	-723.062	Nucleus	other
PRMT1	protein arginine methyltransferase 1	-730.652	Nucleus	enzyme		GSK3368715
PSMB2	proteasome 20S subunit beta 2	-732.654	Cytoplasm	peptidase		bortezomib,bortezomib/cladribine/rituximab,bortezomib/dexamethasone,bortezomib/dexamethasone/doxorubicin,bortezomib/dexamethasone/lenalidomide,bortezomib/dexamethasone/pomalidomide,bortezomib/dexamethasone/rituximab,bortezomib/dexamethasone/thalidomide,bortezomib/doxorubicin,bortezomib/fulvestrant,bortezomib/lenalidomide,bortezomib/paclitaxel,bortezomib/prednisone,bortezomib/rituximab,bortezomib/…
ARF1	ADP ribosylation factor 1	-736.91	Cytoplasm	enzyme
H4C14	H4 clustered histone 14	-747.588	Nucleus	other
SLC25A4	solute carrier family 25 member 4	-750.237	Cytoplasm	transporter		clodronic acid
FOS	Fos proto-oncogene, AP-1 transcription factor subunit	-758.856	Nucleus	transcription regulator	diagnosis,efficacy
IGFBP7	insulin like growth factor binding protein 7	-786.14	Extracellular Space	transporter
ACTA2	actin alpha 2, smooth muscle	-788.01	Cytoplasm	other	efficacy		59	11475	81633
LRRC59	leucine rich repeat containing 59	-790.752	Cytoplasm	other
PCOLCE	procollagen C-endopeptidase enhancer	-801.85	Extracellular Space	other
H2AX	H2A.X variant histone	-805.476	Nucleus	transcription regulator	efficacy
HIPK2	homeodomain interacting protein kinase 2	-811.416	Nucleus	kinase
Anp32a	acidic (leucine-rich) nuclear phosphoprotein 32 family, member A	-812.273	Nucleus	other
H4C4	H4 clustered histone 4	-814.149	Nucleus	other
DIPK2A	divergent protein kinase domain 2A	-835.298	Cytoplasm	other
RPL11	ribosomal protein L11	-835.862	Cytoplasm	other
HSPA5	heat shock protein family A (Hsp70) member 5	-866.754	Cytoplasm	enzyme	efficacy,unspecified application	PAT-SM6
PDIA6	protein disulfide isomerase family A member 6	-877.173	Cytoplasm	enzyme
Gm6682	tubulin, alpha 1C pseudogene	-880.2	Other	other
H2BC8	H2B clustered histone 8	-884.99	Nucleus	other
DYNLL1	dynein light chain LC8-type 1	-888.227	Cytoplasm	other
DBP	D-box binding PAR bZIP transcription factor	-901.755	Nucleus	transcription regulator
MEDAG	mesenteric estrogen dependent adipogenesis	-917.21	Cytoplasm	other
H3C7	H3 clustered histone 7	-989.17	Nucleus	other
H2AC11	H2A clustered histone 11	-991.292	Nucleus	other
H4C15	H4 clustered histone 15	-994.295	Nucleus	other
GNAI2	G protein subunit alpha i2	-1000.29	Plasma Membrane	enzyme
YBX1	Y-box binding protein 1	-1009.33	Nucleus	transcription regulator
Fus	fused in sarcoma	-1019.76	Nucleus	transcription regulator
PLK1	polo like kinase 1	-1030.62	Nucleus	kinase	unspecified application	BI 2536,GSK461364,lipid encapsulated anti-PLK1 siRNA TKM-080301,MK1496,onvansertib,rigosertib,TAK-960,volasertib
Cox6c	cytochrome c oxidase subunit 6C	-1052.1	Cytoplasm	enzyme
GPX1	glutathione peroxidase 1	-1061.87	Cytoplasm	enzyme	diagnosis,efficacy
EIF5A	eukaryotic translation initiation factor 5A	-1063.9	Cytoplasm	translation regulator		SNS01-T nanoparticles
EHD2	EH domain containing 2	-1069.3	Nucleus	other
EGR1	early growth response 1	-1098.25	Nucleus	transcription regulator	diagnosis,efficacy
HNRNPH1	heterogeneous nuclear ribonucleoprotein H1	-1121.1	Nucleus	other	diagnosis
THBS1	thrombospondin 1	-1151.43	Extracellular Space	other	diagnosis,efficacy
OSR1	odd-skipped related transcription factor 1	-1155.38	Nucleus	transcription regulator
LOX	lysyl oxidase	-1183.43	Extracellular Space	enzyme
NR2F2	nuclear receptor subfamily 2 group F member 2	-1211.38	Nucleus	ligand-dependent nuclear receptor
FSCN1	fascin actin-bundling protein 1	-1214.95	Cytoplasm	other	unspecified application
H2AC12	H2A clustered histone 12	-1222.89	Nucleus	other
CAV1	caveolin 1	-1226.72	Plasma Membrane	transmembrane receptor	diagnosis
ATP5F1B	ATP synthase F1 subunit beta	-1250.42	Cytoplasm	transporter
H2AC17	H2A clustered histone 17	-1258.16	Nucleus	other
RBM3	RNA binding motif protein 3	-1258.49	Cytoplasm	other
MTAP	methylthioadenosine phosphorylase	-1279.77	Nucleus	enzyme	efficacy,prognosis,safety
ACTB	actin beta	-1324.03	Cytoplasm	other			60	11461	81822
COL1A1	collagen type I alpha 1 chain	-1355.47	Extracellular Space	other	diagnosis	collagenase clostridium histolyticum
PTN	pleiotrophin	-1372.26	Extracellular Space	growth factor
Gsta4	glutathione S-transferase, alpha 4	-1406.77	Other	enzyme
H2AC8	H2A clustered histone 8	-1424.49	Nucleus	other
H2ac24	H2A clustered histone 24	-1424.49	Nucleus	other
COL3A1	collagen type III alpha 1 chain	-1431.69	Extracellular Space	other	diagnosis,efficacy	collagenase clostridium histolyticum
CALR	calreticulin	-1584.54	Cytoplasm	transcription regulator	efficacy,unspecified application
CSF1	colony stimulating factor 1	-1768.87	Extracellular Space	cytokine	diagnosis,disease progression,efficacy,prognosis,unspecified application	lacnotuzumab,PD-360324
Rplp1 (includes others)	ribosomal protein, large, P1	-1835.31	Nucleus	other
BGN	biglycan	-1949.85	Extracellular Space	other
SPARC	secreted protein acidic and cysteine rich	-2486.48	Extracellular Space	other	disease progression,efficacy
EFEMP1	EGF containing fibulin extracellular matrix protein 1	-3729.17	Extracellular Space	enzyme

## Sheet: Table S3b - Genes reg. 1 µM
Table S3b Genes differentially regulated at Rg5 concentrations 1 µM
Test sample code		S3
Ginsenoside Rg5 concentration, x = - log 10,		6
Symbol	Entrez Gene Name	Expr Fold Change	Location	Type(s)	Biomarker Application(s)	Drug(s)	Entrez Gene ID for Human	Entrez Gene ID for Mouse	Entrez Gene ID for Rat
SLC2A1	solute carrier family 2 member 1	1069.94	Plasma Membrane	transporter	diagnosis,efficacy
HMGCS1	3-hydroxy-3-methylglutaryl-CoA synthase 1	512.647	Cytoplasm	enzyme
COL1A1	collagen type I alpha 1 chain	504.368	Extracellular Space	other	diagnosis	collagenase clostridium histolyticum
TM4SF1	transmembrane 4 L six family member 1	389.829	Plasma Membrane	other
EML1	EMAP like 1	354.357	Cytoplasm	other
MTAP	methylthioadenosine phosphorylase	338.646	Nucleus	enzyme	efficacy,prognosis,safety
DHCR24	24-dehydrocholesterol reductase	307.644	Cytoplasm	enzyme
SPECC1	sperm antigen with calponin homology and coiled-coil domains 1	268.376	Nucleus	other
PTTG1IP	PTTG1 interacting protein	264.656	Nucleus	other
MAPRE1	microtubule associated protein RP/EB family member 1	264.312	Cytoplasm	other
HACD2	3-hydroxyacyl-CoA dehydratase 2	262.801	Cytoplasm	phosphatase
POLR1A	RNA polymerase I subunit A	225.365	Nucleus	enzyme
CYP51A1	cytochrome P450 family 51 subfamily A member 1	224.957	Cytoplasm	enzyme		betamethasone/clotrimazole,bifonazole,clotrimazole,econazole,efinaconazole,fluconazole,itraconazole,ketoconazole,luliconazole,miconazole,oxiconazole,posaconazole,sertaconazole,terconazole,voriconazole
RHOC	ras homolog family member C	193.069	Plasma Membrane	enzyme	diagnosis,prognosis
OSBPL9	oxysterol binding protein like 9	188.243	Cytoplasm	other
HSPA8	heat shock protein family A (Hsp70) member 8	153.048	Cytoplasm	enzyme	diagnosis
GBF1	golgi brefeldin A resistant guanine nucleotide exchange factor 1	150.195	Cytoplasm	other
EPB41L2	erythrocyte membrane protein band 4.1 like 2	149.074	Plasma Membrane	other
GIPC1	GIPC PDZ domain containing family member 1	140.423	Cytoplasm	other
ACSL4	acyl-CoA synthetase long chain family member 4	140.168	Cytoplasm	enzyme			2182	50790	113976
ZSWIM4	zinc finger SWIM-type containing 4	134.878	Other	other
UBA6	ubiquitin like modifier activating enzyme 6	131.582	Cytoplasm	enzyme
KIF3C	kinesin family member 3C	125	Cytoplasm	other
TAS1R1	taste 1 receptor member 1	124.277	Plasma Membrane	G-protein coupled receptor
SQLE	squalene epoxidase	123.831	Cytoplasm	enzyme		butenafine,naftifine,terbinafine,tolnaftate
DAG1	dystroglycan 1	121.187	Plasma Membrane	transmembrane receptor
POR	cytochrome p450 oxidoreductase	121.109	Cytoplasm	enzyme		carboplatin/doxorubicin,cisplatin/doxorubicin,cisplatin/doxorubicin/ifosfamide,cisplatin/doxorubicin/ifosfamide/methotrexate,cisplatin/doxorubicin/methotrexate,dacarbazine/doxorubicin,dacarbazine/doxorubicin/ifosfamide,daunorubicin,daunorubicin/tretinoin,doxorubicin,doxorubicin/ifosfamide,doxorubicin/streptozocin,doxorubicin/tretinoin,nitazoxanide,nitazoxanide/peginterferon alfa-2a/ribavirin
MVD	mevalonate diphosphate decarboxylase	120.327	Cytoplasm	enzyme
MFSD1	major facilitator superfamily domain containing 1	105.263	Other	transporter
RUNX1	RUNX family transcription factor 1	104.172	Nucleus	transcription regulator	unspecified application
LSM6	LSM6 homolog, U6 small nuclear RNA and mRNA degradation associated	102.062	Nucleus	other
5830417I10Rik	gon-4-like pseudogene	101.859	Other	other				100302730
MRPL52	mitochondrial ribosomal protein L52	99.443	Cytoplasm	other
DYM	dymeclin	96.573	Cytoplasm	other
COL6A3	collagen type VI alpha 3 chain	89.868	Extracellular Space	other		collagenase clostridium histolyticum
TSPAN9	tetraspanin 9	83.525	Plasma Membrane	other
EPHX1	epoxide hydrolase 1	82.79	Cytoplasm	peptidase	diagnosis
IRF1	interferon regulatory factor 1	81.834	Nucleus	transcription regulator
BCAR1	BCAR1 scaffold protein, Cas family member	81.53	Plasma Membrane	enzyme	prognosis
Luzp4 (includes others)	leucine zipper protein 4	79.49	Other	other
TSTA3	tissue specific transplantation antigen P35B	77.81	Plasma Membrane	enzyme
FKBP11	FKBP prolyl isomerase 11	77.12	Cytoplasm	enzyme
TAF12	TATA-box binding protein associated factor 12	76.219	Nucleus	transcription regulator
ZC3HAV1	zinc finger CCCH-type containing, antiviral 1	75.742	Plasma Membrane	other
KLHDC8A	kelch domain containing 8A	75.501	Other	other
Hspa1b	heat shock protein 1B	75.435	Cytoplasm	other
NOM1	nucleolar protein with MIF4G domain 1	74.934	Nucleus	other
LIG1	DNA ligase 1	74.649	Nucleus	enzyme
S100A6	S100 calcium binding protein A6	74.321	Cytoplasm	transporter	diagnosis,unspecified application
TMEM170B	transmembrane protein 170B	73.869	Plasma Membrane	other
FAM76B	family with sequence similarity 76 member B	73.245	Nucleus	other
GORAB	golgin, RAB6 interacting	73.116	Cytoplasm	other
ATG4A	autophagy related 4A cysteine peptidase	67.823	Cytoplasm	peptidase
NMI	N-myc and STAT interactor	67.596	Cytoplasm	transcription regulator
KCTD9	potassium channel tetramerization domain containing 9	62.417	Other	other
ATP23	ATP23 metallopeptidase and ATP synthase assembly factor homolog	62.125	Plasma Membrane	kinase
TMEM258	transmembrane protein 258	59.988	Cytoplasm	other
GASK1A	golgi associated kinase 1A	59.869	Other	other
PRPS2	phosphoribosyl pyrophosphate synthetase 2	58.518	Cytoplasm	kinase
MRPL27	mitochondrial ribosomal protein L27	57.161	Cytoplasm	other
SMAD1	SMAD family member 1	57.009	Nucleus	transcription regulator
RGS3	regulator of G protein signaling 3	56.853	Nucleus	enzyme
STXBP1	syntaxin binding protein 1	55.225	Cytoplasm	transporter
Zfp948	zinc finger protein 948	54.802	Other	other
E2F3	E2F transcription factor 3	53.605	Nucleus	transcription regulator	unspecified application
TGFBR2	transforming growth factor beta receptor 2	53.581	Plasma Membrane	kinase		IMC-TR1
BLMH	bleomycin hydrolase	53.119	Cytoplasm	peptidase
SRR	serine racemase	52.942	Cytoplasm	enzyme
LAMB2	laminin subunit beta 2	52.543	Extracellular Space	enzyme
RRP12	ribosomal RNA processing 12 homolog	51.893	Nucleus	other
SLC4A4	solute carrier family 4 member 4	51.401	Plasma Membrane	transporter
GPR182	G protein-coupled receptor 182	49.342	Plasma Membrane	G-protein coupled receptor
ZNF764	zinc finger protein 764	46.781	Other	other
METTL7A	methyltransferase like 7A	45.96	Cytoplasm	other
IL4R	interleukin 4 receptor	44.437	Plasma Membrane	transmembrane receptor	response to therapy,unspecified application	dupilumab,MDNA55
DMTF1	cyclin D binding myb like transcription factor 1	44.071	Nucleus	transcription regulator
HSH2D	hematopoietic SH2 domain containing	44.043	Cytoplasm	other
DLGAP1	DLG associated protein 1	43.618	Plasma Membrane	other
ZNF608	zinc finger protein 608	41.919	Other	other
DUSP19	dual specificity phosphatase 19	41.199	Cytoplasm	phosphatase
GRWD1	glutamate rich WD repeat containing 1	40.455	Nucleus	other
INTS5	integrator complex subunit 5	38.425	Nucleus	other
CYP4F2	cytochrome P450 family 4 subfamily F member 2	38.216	Cytoplasm	enzyme
C9orf40	chromosome 9 open reading frame 40	38.074	Other	other
Fbxl22	F-box and leucine-rich repeat protein 22	38.027	Other	enzyme
ARHGAP18	Rho GTPase activating protein 18	37.655	Cytoplasm	other
ASB16	ankyrin repeat and SOCS box containing 16	37.155	Cytoplasm	other
HPS5	HPS5 biogenesis of lysosomal organelles complex 2 subunit 2	37.046	Cytoplasm	other	diagnosis
ACER3	alkaline ceramidase 3	35.919	Cytoplasm	enzyme			55331	66190	499210
MTMR14	myotubularin related protein 14	35.389	Cytoplasm	phosphatase
CLDN24	claudin 24	34.415	Plasma Membrane	other
SLC25A41	solute carrier family 25 member 41	34.219	Cytoplasm	transporter
PYGB	glycogen phosphorylase B	33.629	Cytoplasm	enzyme
BLCAP	BLCAP apoptosis inducing factor	32.39	Other	other
PNP	purine nucleoside phosphorylase	32.105	Nucleus	enzyme		forodesine,PD 141955,purine nucleoside phosphorylase inhibitor
RABGAP1L	RAB GTPase activating protein 1 like	31.873	Cytoplasm	other
HES5	hes family bHLH transcription factor 5	31.61	Nucleus	transcription regulator
IMMP1L	inner mitochondrial membrane peptidase subunit 1	31.413	Cytoplasm	other
SSH2	slingshot protein phosphatase 2	30.111	Cytoplasm	phosphatase
SSNA1	SS nuclear autoantigen 1	29.972	Cytoplasm	other
MAN1C1	mannosidase alpha class 1C member 1	29.966	Cytoplasm	enzyme
MSX2	msh homeobox 2	29.751	Nucleus	transcription regulator
TLNRD1	talin rod domain containing 1	29.684	Other	other
Gm2016 (includes others)	predicted gene 8300	29.623	Other	other
PHF1	PHD finger protein 1	29.606	Nucleus	transcription regulator
CCDC189	coiled-coil domain containing 189	29.529	Other	other
XKR8	XK related 8	29.506	Plasma Membrane	other
D030025P21Rik	RIKEN cDNA D030025P21 gene	29.363	Other	other
LBP	lipopolysaccharide binding protein	29.178	Plasma Membrane	transporter	diagnosis,efficacy
WNK2	WNK lysine deficient protein kinase 2	28.902	Cytoplasm	kinase
IBA57	iron-sulfur cluster assembly factor IBA57	28.799	Cytoplasm	other
RHOV	ras homolog family member V	27.422	Plasma Membrane	enzyme
Gja6	gap junction protein, alpha 6	27.245	Plasma Membrane	transporter
LCOR	ligand dependent nuclear receptor corepressor	27.056	Nucleus	transcription regulator
DRD3	dopamine receptor D3	27.055	Plasma Membrane	G-protein coupled receptor	unspecified application	abaperidone,amisulpride,amitriptyline/perphenazine,apomorphine,aripiprazole,asenapine,brexpiprazole,bromocriptine,carbidopa/entacapone/levodopa,carbidopa/levodopa,carbidopa/levodopa/tolcapone,cariprazine,chlorprothixene,cis-thiothixene,clozapine,dexamethasone/olanzapine,dihydroergocryptine,dihydroergotamine,domperidone,dopamine,fluoxetine/olanzapine,fluphenazine,fluphenazine decanoate,fluphenazin…
BLOC1S6	biogenesis of lysosomal organelles complex 1 subunit 6	24.526	Cytoplasm	other
Tcl1b4 (includes others)	T cell leukemia/lymphoma 1B, 4	24.002	Other	other
SLIT3	slit guidance ligand 3	24	Extracellular Space	other
ADAMTS9	ADAM metallopeptidase with thrombospondin type 1 motif 9	23.628	Extracellular Space	peptidase	diagnosis,disease progression		56999	101401	312566
MICAL1	microtubule associated monooxygenase, calponin and LIM domain containing 1	23.363	Cytoplasm	enzyme
HS6ST3	heparan sulfate 6-O-sulfotransferase 3	23.325	Other	enzyme
TSKS	testis specific serine kinase substrate	23.318	Cytoplasm	kinase
USP20	ubiquitin specific peptidase 20	23.204	Cytoplasm	peptidase
CAMK2B	calcium/calmodulin dependent protein kinase II beta	22.957	Cytoplasm	kinase
PEX6	peroxisomal biogenesis factor 6	22.688	Cytoplasm	enzyme
PATZ1	POZ/BTB and AT hook containing zinc finger 1	22.669	Nucleus	transcription regulator
Olfr566 (includes others)	olfactory receptor 566	22.623	Plasma Membrane	G-protein coupled receptor
RAB3GAP2	RAB3 GTPase activating non-catalytic protein subunit 2	22.56	Cytoplasm	enzyme
CROCC2	ciliary rootlet coiled-coil, rootletin family member 2	22.541	Other	other
Zfp472	zinc finger protein 472	22.473	Nucleus	other
USP27X	ubiquitin specific peptidase 27 X-linked	22.32	Other	peptidase
COMMD4	COMM domain containing 4	21.817	Cytoplasm	other
HLA-DRB5	major histocompatibility complex, class II, DR beta 5	21.374	Plasma Membrane	transmembrane receptor
Bmp8b	bone morphogenetic protein 8b	21.33	Extracellular Space	cytokine
SLA	Src like adaptor	20.914	Plasma Membrane	other
NSUN2	NOP2/Sun RNA methyltransferase 2	20.688	Nucleus	enzyme
ZNF287	zinc finger protein 287	20.547	Nucleus	transcription regulator
RNF180	ring finger protein 180	20.425	Cytoplasm	enzyme
2700097O09Rik	RIKEN cDNA 2700097O09 gene	20.272	Extracellular Space	other				72658	314128
C1RL	complement C1r subcomponent like	19.901	Extracellular Space	peptidase
GYG1	glycogenin 1	-20.232	Cytoplasm	enzyme
Vmn1r180 (includes others)	vomeronasal 1 receptor 180	-20.76	Other	other
TMEM215	transmembrane protein 215	-20.948	Other	other
GABARAPL1	GABA type A receptor associated protein like 1	-21.92	Cytoplasm	other
MEGF11	multiple EGF like domains 11	-22.492	Other	other
ETV5	ETS variant transcription factor 5	-22.752	Nucleus	transcription regulator
APBA1	amyloid beta precursor protein binding family A member 1	-23.157	Cytoplasm	transporter	diagnosis,response to therapy
TTC12	tetratricopeptide repeat domain 12	-25.145	Cytoplasm	other
FCGR2B	Fc fragment of IgG receptor IIb	-25.344	Plasma Membrane	transmembrane receptor		BI-1206,IgG,XmAb5871
SEC14L2	SEC14 like lipid binding 2	-25.586	Cytoplasm	transporter
SLC25A37	solute carrier family 25 member 37	-26.391	Cytoplasm	transporter
PIK3C2B	phosphatidylinositol-4-phosphate 3-kinase catalytic subunit type 2 beta	-26.752	Cytoplasm	kinase
CISD2	CDGSH iron sulfur domain 2	-26.807	Cytoplasm	other
ITGB3BP	integrin subunit beta 3 binding protein	-27.046	Nucleus	other
RAB3A	RAB3A, member RAS oncogene family	-27.271	Cytoplasm	enzyme
Arhgap33os	Rho GTPase activating protein 33, opposite strand	-28.29	Other	other
DMAC2	distal membrane arm assembly complex 2	-29.494	Cytoplasm	other
CCL4	C-C motif chemokine ligand 4	-30.822	Extracellular Space	cytokine	diagnosis,efficacy,prognosis,unspecified application
CLEC10A	C-type lectin domain containing 10A	-30.827	Plasma Membrane	other
MRS2	magnesium transporter MRS2	-30.987	Cytoplasm	transporter
MKRN1	makorin ring finger protein 1	-31.792	Cytoplasm	enzyme
SESTD1	SEC14 and spectrin domain containing 1	-31.939	Extracellular Space	other
ENOX2	ecto-NOX disulfide-thiol exchanger 2	-33	Plasma Membrane	enzyme	efficacy
ARL16	ADP ribosylation factor like GTPase 16	-33.192	Cytoplasm	other
CD83	CD83 molecule	-33.215	Plasma Membrane	transmembrane receptor
KANK3	KN motif and ankyrin repeat domains 3	-33.977	Cytoplasm	other
DEDD2	death effector domain containing 2	-34.668	Nucleus	other
KRTAP10-7	keratin associated protein 10-7	-34.874	Cytoplasm	other
STX3	syntaxin 3	-35.477	Plasma Membrane	transporter
ARHGAP33	Rho GTPase activating protein 33	-35.804	Plasma Membrane	transporter
ARHGAP5	Rho GTPase activating protein 5	-36.048	Cytoplasm	enzyme
ZNF334	zinc finger protein 334	-36.17	Nucleus	transcription regulator
ABHD10	abhydrolase domain containing 10, depalmitoylase	-37.012	Cytoplasm	enzyme			55347	213012	303953
SLC16A6	solute carrier family 16 member 6	-37.241	Plasma Membrane	transporter
ZNF622	zinc finger protein 622	-38.157	Nucleus	other
FANCF	FA complementation group F	-39.95	Nucleus	other
NR1D1	nuclear receptor subfamily 1 group D member 1	-40.734	Nucleus	ligand-dependent nuclear receptor
METTL6	methyltransferase like 6	-41.237	Other	enzyme
PSD	pleckstrin and Sec7 domain containing	-43.608	Cytoplasm	transporter
PARD6B	par-6 family cell polarity regulator beta	-43.817	Plasma Membrane	other
WDR61	WD repeat domain 61	-44.502	Nucleus	other
Ccl27a	chemokine (C-C motif) ligand 27A	-44.621	Extracellular Space	cytokine
WDR82	WD repeat domain 82	-45.379	Nucleus	other
EXOSC4	exosome component 4	-45.544	Nucleus	enzyme
GCDH	glutaryl-CoA dehydrogenase	-47.967	Cytoplasm	enzyme
CD302	CD302 molecule	-48.09	Plasma Membrane	transmembrane receptor
KLF5	Kruppel like factor 5	-48.799	Nucleus	transcription regulator
MED13	mediator complex subunit 13	-49.054	Nucleus	transcription regulator
KIF3A	kinesin family member 3A	-49.069	Cytoplasm	enzyme
CCNC	cyclin C	-49.074	Nucleus	other
ADO	2-aminoethanethiol dioxygenase	-50.416	Cytoplasm	enzyme			84890	211488	309732
HLA-DMB	major histocompatibility complex, class II, DM beta	-51.949	Plasma Membrane	transmembrane receptor
MSI2	musashi RNA binding protein 2	-53.504	Cytoplasm	other
AFAP1	actin filament associated protein 1	-53.558	Cytoplasm	other	disease progression		60312	70292	140935
SSU72	SSU72 homolog, RNA polymerase II CTD phosphatase	-53.661	Other	phosphatase
UBE2E1	ubiquitin conjugating enzyme E2 E1	-54.23	Cytoplasm	enzyme
OTUD7B	OTU deubiquitinase 7B	-57.784	Cytoplasm	peptidase
DND1	DND microRNA-mediated repression inhibitor 1	-57.856	Cytoplasm	other
EGR1	early growth response 1	-58.65	Nucleus	transcription regulator	diagnosis,efficacy
SENP2	SUMO specific peptidase 2	-59.632	Nucleus	peptidase
SLC7A11	solute carrier family 7 member 11	-60.654	Plasma Membrane	transporter		(4S)-4-(3-(18F)fluoropropyl)-L-glutamate,N-acetyl-L-cysteine
HYLS1	HYLS1 centriolar and ciliogenesis associated	-60.957	Nucleus	other
RIOK2	RIO kinase 2	-61.255	Cytoplasm	kinase
TM2D3	TM2 domain containing 3	-61.427	Other	other
TMX2	thioredoxin related transmembrane protein 2	-61.701	Other	enzyme
CRYZL1	crystallin zeta like 1	-63.112	Cytoplasm	enzyme
BBS5	Bardet-Biedl syndrome 5	-63.178	Cytoplasm	other
MTFR1L	mitochondrial fission regulator 1 like	-63.734	Other	other
ALAS1	5'-aminolevulinate synthase 1	-64.526	Cytoplasm	enzyme		givosiran	211	11655	65155
FBXW2	F-box and WD repeat domain containing 2	-64.948	Cytoplasm	enzyme
TMEM158	transmembrane protein 158 (gene/pseudogene)	-67.736	Plasma Membrane	other
PPP2CA	protein phosphatase 2 catalytic subunit alpha	-68.889	Cytoplasm	phosphatase
APOBEC1	apolipoprotein B mRNA editing enzyme catalytic subunit 1	-72.384	Cytoplasm	enzyme
AASDH	aminoadipate-semialdehyde dehydrogenase	-75.623	Other	enzyme			132949	231326	364136
TGIF2	TGFB induced factor homeobox 2	-75.812	Nucleus	transcription regulator	prognosis
MYBL1	MYB proto-oncogene like 1	-77.947	Nucleus	transcription regulator
CWC25	CWC25 spliceosome associated protein homolog	-81.076	Nucleus	other
MRPL13	mitochondrial ribosomal protein L13	-83.891	Cytoplasm	other
ZNF442	zinc finger protein 442	-84.713	Nucleus	transcription regulator
DNPEP	aspartyl aminopeptidase	-85.142	Cytoplasm	peptidase
Zfas1	zinc finger, NFX1-type containing 1, antisense RNA 1	-85.755	Other	other
ZNF260	zinc finger protein 260	-94.276	Nucleus	transcription regulator
PFDN4	prefoldin subunit 4	-95.542	Cytoplasm	other
0610009B22Rik	RIKEN cDNA 0610009B22 gene	-98.025	Nucleus	other				66050	100910318
ZMAT2	zinc finger matrin-type 2	-98.873	Nucleus	other
ANKRD27	ankyrin repeat domain 27	-103.684	Cytoplasm	other
FKBP1A	FKBP prolyl isomerase 1A	-104.866	Cytoplasm	enzyme	unspecified application	cyclosporine A/sirolimus/tacrolimus,cyclosporine A/tacrolimus,everolimus,everolimus/exemestane,everolimus/fulvestrant,everolimus/gefitinib,everolimus/lenvatinib,everolimus/letrozole,everolimus/paclitaxel,everolimus/panobinostat,everolimus/pasireotide,everolimus/ribociclib,everolimus/sorafenib,everolimus/tamoxifen,everolimus/vandetanib,imatinib/sirolimus,lenalidomide/temsirolimus,methotrexate/siro…
ABHD2	abhydrolase domain containing 2, acylglycerol lipase	-104.926	Cytoplasm	enzyme			11057	54608	293050
GOT1	glutamic-oxaloacetic transaminase 1	-105.762	Cytoplasm	enzyme
BTF3	basic transcription factor 3	-107.26	Nucleus	transcription regulator
BLOC1S2	biogenesis of lysosomal organelles complex 1 subunit 2	-116.127	Cytoplasm	other
CSNK1A1	casein kinase 1 alpha 1	-116.722	Cytoplasm	kinase
MED13L	mediator complex subunit 13L	-117.082	Nucleus	other
Gm13695 (includes others)	CWC22 spliceosome-associated protein homolog pseudogene	-117.433	Other	other
RPL38	ribosomal protein L38	-122.013	Cytoplasm	other
GABPB1	GA binding protein transcription factor subunit beta 1	-123.75	Nucleus	transcription regulator
LTV1	LTV1 ribosome biogenesis factor	-124.247	Other	other
GABPB2	GA binding protein transcription factor subunit beta 2	-127.202	Nucleus	transcription regulator
SCPEP1	serine carboxypeptidase 1	-128.596	Cytoplasm	peptidase
AKT2	AKT serine/threonine kinase 2	-129.339	Cytoplasm	kinase		BAY1125976,enzastaurin,GSK690693,triciribine,triciribine phosphate	208	11652	25233
NUPR1	nuclear protein 1, transcriptional regulator	-130.54	Nucleus	transcription regulator
DTYMK	deoxythymidylate kinase	-133.577	Cytoplasm	kinase
PDZD8	PDZ domain containing 8	-134.45	Extracellular Space	other
Yaf2	YY1 associated factor 2	-135.282	Nucleus	transcription regulator
TBPL1	TATA-box binding protein like 1	-136.591	Nucleus	transcription regulator
POLE2	DNA polymerase epsilon 2, accessory subunit	-141.146	Nucleus	enzyme		bortezomib/cladribine/rituximab,cladribine,cladribine/cytarabine/daunorubicin,cladribine/cytarabine/decitabine,cladribine/cytarabine/filgrastim,cladribine/cytarabine/filgrastim/idarubicin,cladribine/cytarabine/filgrastim/idarubicin/plerixafor,cladribine/cytarabine/filgrastim/mitoxantrone,cladribine/peginterferon alfa-2a,cladribine/recombinant interferon,cladribine/rituximab
COX10	cytochrome c oxidase assembly factor heme A:farnesyltransferase COX10	-147.474	Cytoplasm	enzyme
EEFSEC	eukaryotic elongation factor, selenocysteine-tRNA specific	-147.627	Cytoplasm	translation regulator
PACS2	phosphofurin acidic cluster sorting protein 2	-157.438	Cytoplasm	other
DCTD	dCMP deaminase	-158.104	Cytoplasm	enzyme		tetrahydrouridine
FAM3C	FAM3 metabolism regulating signaling molecule C	-158.525	Extracellular Space	cytokine
TOMM20	translocase of outer mitochondrial membrane 20	-172.912	Cytoplasm	transporter
AP3M1	adaptor related protein complex 3 subunit mu 1	-176.355	Cytoplasm	transporter
ABHD17B	abhydrolase domain containing 17B, depalmitoylase	-176.861	Plasma Membrane	peptidase			51104	226016	309399
FN1	fibronectin 1	-176.964	Extracellular Space	enzyme	diagnosis,efficacy,prognosis,unspecified application	AS1409,bifikafusp alfa,iodine I 131 anti-fibronectin antibody fragment L19-SIP,L19-IL2 monoclonal antibody-cytokine fusion protein/L19TNFalpha,L19TNFalpha,ocriplasmin
CISD1	CDGSH iron sulfur domain 1	-181.035	Cytoplasm	other
BAZ1A	bromodomain adjacent to zinc finger domain 1A	-185.65	Nucleus	other
PCK2	phosphoenolpyruvate carboxykinase 2, mitochondrial	-192.449	Cytoplasm	kinase
AP1G1	adaptor related protein complex 1 subunit gamma 1	-206.447	Cytoplasm	other
GADD45A	growth arrest and DNA damage inducible alpha	-215.849	Nucleus	other	efficacy
KHSRP	KH-type splicing regulatory protein	-222.271	Nucleus	enzyme	unspecified application
CNOT7	CCR4-NOT transcription complex subunit 7	-232.775	Nucleus	transcription regulator
CCM2	CCM2 scaffold protein	-238.253	Cytoplasm	other
EXOSC1	exosome component 1	-250.514	Nucleus	enzyme
CTH	cystathionine gamma-lyase	-259.212	Cytoplasm	enzyme
GPX1	glutathione peroxidase 1	-291.75	Cytoplasm	enzyme	diagnosis,efficacy
CA6	carbonic anhydrase 6	-305.91	Extracellular Space	enzyme		acetazolamide,benzthiazide,chlorothiazide,chlorthalidone,hydrochlorothiazide,methazolamide,SAR566658,sulfacetamide,topiramate,trichloromethiazide
ERP44	endoplasmic reticulum protein 44	-306.665	Cytoplasm	enzyme
ALDH1L2	aldehyde dehydrogenase 1 family member L2	-334.081	Cytoplasm	enzyme			160428	216188	299699
GDI2	GDP dissociation inhibitor 2	-335.68	Cytoplasm	other
BABAM2	BRISC and BRCA1 A complex member 2	-340.179	Cytoplasm	other
Cdsn	corneodesmosin	-366.032	Extracellular Space	other
LONP1	lon peptidase 1, mitochondrial	-424.399	Cytoplasm	peptidase
ARHGEF2	Rho/Rac guanine nucleotide exchange factor 2	-449.369	Cytoplasm	other
HSPD1	heat shock protein family D (Hsp60) member 1	-489.188	Cytoplasm	enzyme	diagnosis,prognosis
MORF4L2	mortality factor 4 like 2	-668.257	Nucleus	other

## Sheet: Table S3c - Genes reg. 1 nM
Table S3c Genes differentially regulated at Rg5 concentrations 1 nM
Test sample code		S4
Ginsenoside Rg5 concentration, x = - log 10,		9
Symbol	Entrez Gene Name	Expr Fold Change	Location	Type(s)	Biomarker Application(s)	Drug(s)	Entrez Gene ID for Human	Entrez Gene ID for Mouse	Entrez Gene ID for Rat
COL3A1	collagen type III alpha 1 chain	550.734	Extracellular Space	other	diagnosis,efficacy	collagenase clostridium histolyticum
GPI	glucose-6-phosphate isomerase	411.558	Extracellular Space	enzyme	unspecified application
TM4SF1	transmembrane 4 L six family member 1	320.708	Plasma Membrane	other
HSPA8	heat shock protein family A (Hsp70) member 8	301.383	Cytoplasm	enzyme	diagnosis
GOLPH3	golgi phosphoprotein 3	295.76	Cytoplasm	other
GASK1B	golgi associated kinase 1B	272.725	Cytoplasm	other
TBL1XR1	TBL1X receptor 1	266.121	Nucleus	transcription regulator
TXNIP	thioredoxin interacting protein	247.895	Cytoplasm	other
ARHGDIA	Rho GDP dissociation inhibitor alpha	238.392	Cytoplasm	other	unspecified application
ETF1	eukaryotic translation termination factor 1	234.678	Cytoplasm	translation regulator
OGDH	oxoglutarate dehydrogenase	220.486	Cytoplasm	enzyme
ELOVL6	ELOVL fatty acid elongase 6	218.71	Cytoplasm	enzyme
POLR1A	RNA polymerase I subunit A	217.914	Nucleus	enzyme
CFL1	cofilin 1	210.445	Nucleus	other
UBE3A	ubiquitin protein ligase E3A	208.005	Nucleus	enzyme
ATP5F1A	ATP synthase F1 subunit alpha	202.055	Cytoplasm	transporter
DDX3X	DEAD-box helicase 3 X-linked	192.614	Cytoplasm	enzyme	diagnosis
LTA4H	leukotriene A4 hydrolase	187.847	Cytoplasm	enzyme
Ccl2	chemokine (C-C motif) ligand 2	184.082	Extracellular Space	cytokine	unspecified application
EFCAB14	EF-hand calcium binding domain 14	174.246	Other	other
Tpm1	tropomyosin 1, alpha	167.585	Plasma Membrane	other
PSMC2	proteasome 26S subunit, ATPase 2	163.811	Nucleus	peptidase
GBF1	golgi brefeldin A resistant guanine nucleotide exchange factor 1	163.048	Cytoplasm	other
CSNK1D	casein kinase 1 delta	161.017	Cytoplasm	kinase
OGT	O-linked N-acetylglucosamine (GlcNAc) transferase	153.561	Cytoplasm	enzyme
FNDC3B	fibronectin type III domain containing 3B	148.797	Cytoplasm	other
Gm11007	predicted gene 11007	146.49	Other	other
SLC38A10	solute carrier family 38 member 10	146.257	Cytoplasm	other
HK1	hexokinase 1	141.384	Cytoplasm	kinase
COPA	COPI coat complex subunit alpha	132.998	Cytoplasm	transporter
GTPBP4	GTP binding protein 4	132.484	Nucleus	enzyme
BAG3	BAG cochaperone 3	129.437	Cytoplasm	other
ABLIM1	actin binding LIM protein 1	126.61	Cytoplasm	other			3983	226251	307989
EPB41L2	erythrocyte membrane protein band 4.1 like 2	121.315	Plasma Membrane	other
5830417I10Rik	gon-4-like pseudogene	120.708	Other	other				100302730
BRD2	bromodomain containing 2	119.936	Nucleus	kinase		BI 894999
Ccl7	chemokine (C-C motif) ligand 7	118.309	Extracellular Space	cytokine	unspecified application
BNIP3	BCL2 interacting protein 3	113.773	Cytoplasm	other
Zfp974	zinc finger protein 974	109.908	Other	other
TGFBR2	transforming growth factor beta receptor 2	104.166	Plasma Membrane	kinase		IMC-TR1
TXNRD1	thioredoxin reductase 1	103.258	Cytoplasm	enzyme		arsenic trioxide,arsenic trioxide/cytarabine/methotrexate,arsenic trioxide/daunorubicin/tretinoin,arsenic trioxide/gemtuzumab ozogamicin/tretinoin,arsenic trioxide/idarubicin/tretinoin,arsenic trioxide/tretinoin,auranofin,ethaselen
STXBP5	syntaxin binding protein 5	101.935	Plasma Membrane	other
NFIC	nuclear factor I C	97.956	Nucleus	transcription regulator
SLN	sarcolipin	92.222	Cytoplasm	other
KLC1	kinesin light chain 1	91.718	Cytoplasm	other
LRIG1	leucine rich repeats and immunoglobulin like domains 1	91.015	Extracellular Space	other
SLTM	SAFB like transcription modulator	90.647	Nucleus	other
ARHGEF12	Rho guanine nucleotide exchange factor 12	88.891	Cytoplasm	other
NOTCH2	notch receptor 2	85.91	Plasma Membrane	transcription regulator	unspecified application
UQCRHL	ubiquinol-cytochrome c reductase hinge protein like	84.993	Cytoplasm	other
ZNF442	zinc finger protein 442	84.411	Nucleus	transcription regulator
GIPC1	GIPC PDZ domain containing family member 1	84.163	Cytoplasm	other
PPM1E	protein phosphatase, Mg2+/Mn2+ dependent 1E	82.73	Nucleus	phosphatase
TSTA3	tissue specific transplantation antigen P35B	79.549	Plasma Membrane	enzyme
CDC26	cell division cycle 26	78.551	Nucleus	other
MYO10	myosin X	74.618	Cytoplasm	enzyme
TMEM119	transmembrane protein 119	74.463	Cytoplasm	other
CLASP1	cytoplasmic linker associated protein 1	74.131	Cytoplasm	other
Gm12666	predicted gene 12666	73.42	Other	other
INTS5	integrator complex subunit 5	73.264	Nucleus	other
SLC25A32	solute carrier family 25 member 32	70.77	Cytoplasm	transporter
HYOU1	hypoxia up-regulated 1	69.294	Cytoplasm	other
L3MBTL1	L3MBTL histone methyl-lysine binding protein 1	69.025	Nucleus	other
SPATS1	spermatogenesis associated serine rich 1	67.116	Extracellular Space	other
FDFT1	farnesyl-diphosphate farnesyltransferase 1	66.775	Cytoplasm	enzyme	unspecified application	lapaquistat,zoledronic acid
PRPF31	pre-mRNA processing factor 31	65.592	Nucleus	other
RLN3	relaxin 3	64.796	Extracellular Space	other
TTLL9	tubulin tyrosine ligase like 9	63.605	Cytoplasm	other
CHMP2B	charged multivesicular body protein 2B	63.047	Cytoplasm	other
PCYT2	phosphate cytidylyltransferase 2, ethanolamine	62.97	Cytoplasm	enzyme
FEZ2	fasciculation and elongation protein zeta 2	61.886	Cytoplasm	other
PKP4	plakophilin 4	60.098	Plasma Membrane	other
PRR5	proline rich 5	59.881	Cytoplasm	other
ENTPD6	ectonucleoside triphosphate diphosphohydrolase 6	59.534	Cytoplasm	enzyme
UBE2O	ubiquitin conjugating enzyme E2 O	57.001	Nucleus	enzyme
TFAP2A	transcription factor AP-2 alpha	56.76	Nucleus	transcription regulator	diagnosis,prognosis
ACTR3	actin related protein 3	55.434	Plasma Membrane	other	diagnosis		10096	74117	81732
TSPAN9	tetraspanin 9	54.995	Plasma Membrane	other
FER	FER tyrosine kinase	54.473	Cytoplasm	kinase		lorlatinib
WNK2	WNK lysine deficient protein kinase 2	52.459	Cytoplasm	kinase
PRPF19	pre-mRNA processing factor 19	51.665	Nucleus	enzyme
RARS1	arginyl-tRNA synthetase 1	51.426	Cytoplasm	enzyme
CAVIN3	caveolae associated protein 3	51.175	Cytoplasm	other
NDST1	N-deacetylase and N-sulfotransferase 1	51.006	Cytoplasm	enzyme
Lce1a2	late cornified envelope 1A2	49.339	Other	other
GABPA	GA binding protein transcription factor subunit alpha	47.23	Nucleus	transcription regulator
DLGAP1	DLG associated protein 1	47.189	Plasma Membrane	other
CRNKL1	crooked neck pre-mRNA splicing factor 1	46.265	Nucleus	other
DNTTIP1	deoxynucleotidyltransferase terminal interacting protein 1	46.064	Nucleus	ligand-dependent nuclear receptor
ZAR1L	zygote arrest 1 like	45.61	Cytoplasm	other
FBF1	Fas binding factor 1	45.188	Nucleus	other
TAF11	TATA-box binding protein associated factor 11	43	Nucleus	transcription regulator
TIMM22	translocase of inner mitochondrial membrane 22	42.899	Cytoplasm	transporter
ASPM	assembly factor for spindle microtubules	42.889	Nucleus	other
FAM76B	family with sequence similarity 76 member B	42.236	Nucleus	other
UBE2G2	ubiquitin conjugating enzyme E2 G2	41.573	Cytoplasm	enzyme
Fbxl22	F-box and leucine-rich repeat protein 22	41.29	Other	enzyme
GNB3	G protein subunit beta 3	41.26	Plasma Membrane	enzyme	safety,unspecified application
ANKH	ANKH inorganic pyrophosphate transport regulator	39.785	Plasma Membrane	transporter
TMEM170B	transmembrane protein 170B	39.703	Plasma Membrane	other
TLR4	toll like receptor 4	38.362	Plasma Membrane	transmembrane receptor	efficacy	eritoran,GSK1795091,OM 174 lipid,resatorvid
UNC5B	unc-5 netrin receptor B	38.294	Plasma Membrane	transmembrane receptor
B4GALT2	beta-1,4-galactosyltransferase 2	37.131	Cytoplasm	enzyme
MMAA	metabolism of cobalamin associated A	35.861	Cytoplasm	enzyme
MOB3A	MOB kinase activator 3A	35.846	Other	other
Cyp4f17	cytochrome P450, family 4, subfamily f, polypeptide 17	35.667	Other	other
NCAPH2	non-SMC condensin II complex subunit H2	35.331	Nucleus	other
SUN1	Sad1 and UNC84 domain containing 1	35.251	Nucleus	other
Fbxo38	F-box protein 38	34.688	Other	other
RBM34	RNA binding motif protein 34	34.053	Nucleus	other
ESR1	estrogen receptor 1	33.61	Nucleus	ligand-dependent nuclear receptor	diagnosis,disease progression,efficacy,prognosis,response to therapy,unspecified application	17-alpha-ethinylestradiol,4-hydroxytamoxifen,abemaciclib/fulvestrant,acolbifene,alpelisib/fulvestrant,anastrozole/exemestane/fulvestrant,anastrozole/exemestane/fulvestrant/tamoxifen,anastrozole/fulvestrant,anastrozole/fulvestrant/goserelin/tamoxifen,anastrozole/fulvestrant/tamoxifen,anastrozole/goserelin/tamoxifen,anastrozole/tamoxifen,ARV-471,arzoxifene,AZD9496,AZD9833,bazedoxifene,beta-estradio…
MLYCD	malonyl-CoA decarboxylase	32.804	Cytoplasm	enzyme
UBASH3B	ubiquitin associated and SH3 domain containing B	32.452	Other	enzyme
CLSTN3	calsyntenin 3	32.315	Plasma Membrane	other
PLPP7	phospholipid phosphatase 7 (inactive)	31.694	Nucleus	phosphatase
SERAC1	serine active site containing 1	31.46	Extracellular Space	other
PPP1R35	protein phosphatase 1 regulatory subunit 35	30.899	Other	other
DOLK	dolichol kinase	30.689	Cytoplasm	kinase
4933414I15Rik	RIKEN cDNA 4933414I15 gene	30.127	Other	other				74408
VGF	VGF nerve growth factor inducible	29.429	Extracellular Space	growth factor	unspecified application
KCNAB2	potassium voltage-gated channel subfamily A regulatory beta subunit 2	29.158	Plasma Membrane	ion channel
IFI35	interferon induced protein 35	29.051	Nucleus	other
SLC23A3	solute carrier family 23 member 3	28.844	Other	transporter
GASK1A	golgi associated kinase 1A	28.793	Other	other
NUDT17	nudix hydrolase 17	28.002	Cytoplasm	other
TBX15	T-box transcription factor 15	27.933	Nucleus	transcription regulator
Gm16440 (includes others)	predicted gene 16440	26.855	Other	other
LYZ	lysozyme	26.539	Extracellular Space	enzyme	unspecified application
MUC20	mucin 20, cell surface associated	26.084	Plasma Membrane	other
SPDEF	SAM pointed domain containing ETS transcription factor	25.473	Nucleus	transcription regulator	efficacy,prognosis
Gm10130	predicted gene 10130	25.122	Other	other
RSPO1	R-spondin 1	24.657	Plasma Membrane	other
PPM1H	protein phosphatase, Mg2+/Mn2+ dependent 1H	24.514	Nucleus	phosphatase
ZFPM1	zinc finger protein, FOG family member 1	24.435	Nucleus	transcription regulator
ASPDH	aspartate dehydrogenase domain containing	23.684	Other	other
1700001F09Rik (includes others)	predicted gene 5800	23.419	Other	other				71826|385138|545047|666186|666207|666253|666376|666420|666485|666561|666647|666660|666675|666678|666723|100041106|100042055|100042342|100504444|100861719|102631639|102631744|102634269|102634304|102634872|102635067|102635261|102635554|102636283|102636509|102636873|102636948|102637812|102638116|102639794|102640847|102640955|108168153|108168156
FRK	fyn related Src family tyrosine kinase	23.176	Nucleus	kinase		regorafenib,regorafenib/sunitinib
TRIM8	tripartite motif containing 8	22.016	Nucleus	enzyme
ILVBL	ilvB acetolactate synthase like	21.929	Cytoplasm	enzyme
SLC1A1	solute carrier family 1 member 1	21.546	Plasma Membrane	transporter		riluzole
ZNF324	zinc finger protein 324	21.243	Nucleus	transcription regulator
OR4D1	olfactory receptor family 4 subfamily D member 1	21.039	Plasma Membrane	G-protein coupled receptor
Prss44	protease, serine 44	20.815	Cytoplasm	other
CRYBB3	crystallin beta B3	20.595	Other	other
SRR	serine racemase	20.595	Cytoplasm	enzyme
PPP1R13L	protein phosphatase 1 regulatory subunit 13 like	20.569	Nucleus	transcription regulator
ERICH5	glutamate rich 5	20.165	Other	other
EGFL6	EGF like domain multiple 6	19.985	Extracellular Space	other
PLEKHH2	pleckstrin homology, MyTH4 and FERM domain containing H2	19.938	Cytoplasm	other
ZCCHC8	zinc finger CCHC-type containing 8	19.003	Nucleus	other
PSMB5	proteasome 20S subunit beta 5	18.351	Cytoplasm	peptidase		bortezomib,bortezomib/cladribine/rituximab,bortezomib/dexamethasone,bortezomib/dexamethasone/doxorubicin,bortezomib/dexamethasone/lenalidomide,bortezomib/dexamethasone/pomalidomide,bortezomib/dexamethasone/rituximab,bortezomib/dexamethasone/thalidomide,bortezomib/doxorubicin,bortezomib/fulvestrant,bortezomib/lenalidomide,bortezomib/paclitaxel,bortezomib/prednisone,bortezomib/rituximab,bortezomib/…
Trim43a (includes others)	tripartite motif-containing 43A	18.189	Other	other
PCSK1N	proprotein convertase subtilisin/kexin type 1 inhibitor	-17.956	Extracellular Space	other
PDPK1	3-phosphoinositide dependent protein kinase 1	-18.735	Cytoplasm	kinase
COL6A6	collagen type VI alpha 6 chain	-18.871	Extracellular Space	other
CA8	carbonic anhydrase 8	-18.961	Cytoplasm	enzyme
Olfr1024	olfactory receptor 1024	-19.038	Plasma Membrane	G-protein coupled receptor
MYL6B	myosin light chain 6B	-19.227	Cytoplasm	other
SH3GL2	SH3 domain containing GRB2 like 2, endophilin A1	-20.214	Plasma Membrane	enzyme
SOAT2	sterol O-acyltransferase 2	-20.471	Cytoplasm	enzyme	unspecified application
ZNF444	zinc finger protein 444	-22.253	Nucleus	transcription regulator
Gm3383 (includes others)	predicted gene 5797	-22.265	Other	other
GYG1	glycogenin 1	-22.939	Cytoplasm	enzyme
CRTAM	cytotoxic and regulatory T cell molecule	-23.004	Plasma Membrane	other
CDKN2D	cyclin dependent kinase inhibitor 2D	-23.27	Cytoplasm	transcription regulator
2610008E11Rik	RIKEN cDNA 2610008E11 gene	-23.647	Other	other				72128	691170
SCN2A	sodium voltage-gated channel alpha subunit 2	-23.926	Plasma Membrane	ion channel		riluzole,zonisamide
CPSF4	cleavage and polyadenylation specific factor 4	-24.196	Nucleus	other
BICDL1	BICD family like cargo adaptor 1	-24.254	Cytoplasm	other
PHF14	PHD finger protein 14	-24.312	Nucleus	other
TIAM2	TIAM Rac1 associated GEF 2	-24.335	Cytoplasm	enzyme
RAB3A	RAB3A, member RAS oncogene family	-24.349	Cytoplasm	enzyme
SWT1	SWT1 RNA endoribonuclease homolog	-24.561	Extracellular Space	other
SAMD1	sterile alpha motif domain containing 1	-24.766	Other	other
TRMT6	tRNA methyltransferase 6	-25.054	Nucleus	other
RELT	RELT TNF receptor	-25.383	Plasma Membrane	transmembrane receptor
ASPRV1	aspartic peptidase retroviral like 1	-25.702	Other	peptidase
RUVBL2	RuvB like AAA ATPase 2	-26.707	Nucleus	transcription regulator
RASL11B	RAS like family 11 member B	-26.724	Plasma Membrane	enzyme
MXD1	MAX dimerization protein 1	-26.777	Nucleus	transcription regulator
TMEM17	transmembrane protein 17	-26.781	Extracellular Space	other
NUDT22	nudix hydrolase 22	-27.207	Nucleus	enzyme
ERBB2	erb-b2 receptor tyrosine kinase 2	-27.842	Plasma Membrane	kinase	diagnosis,disease progression,efficacy,prognosis,safety,unspecified application	188Re-NM02,68GaNOTA-anti-HER2 VHH1,89Zr-trastuzumab,99m-Tc-NM-02,99mTc-HPArk2,[68Ga]ABY-025,A166,ADCT-502,afatinib,afatinib/cetuximab,afatinib/dasatinib,afatinib/osimertinib,afatinib/paclitaxel,allitinib,alpelisib/trastuzumab emtansine,anastrozole/lapatinib,anastrozole/lapatinib/trastuzumab,anastrozole/pertuzumab/trastuzumab,anastrozole/trastuzumab,anti-ErbB2 ADC B003,anti-HER2 antibody,AP32788,A…
CNIH2	cornichon family AMPA receptor auxiliary protein 2	-28.437	Extracellular Space	other
SH2B2	SH2B adaptor protein 2	-28.836	Cytoplasm	other
SMG8	SMG8 nonsense mediated mRNA decay factor	-28.943	Cytoplasm	enzyme
Gm8773	predicted gene 8773	-29.719	Other	other
NDUFAF6	NADH:ubiquinone oxidoreductase complex assembly factor 6	-29.944	Cytoplasm	other
Aldh3b2	aldehyde dehydrogenase 3 family, member B2	-31.582	Cytoplasm	enzyme				621603
RIPPLY2	ripply transcriptional repressor 2	-31.846	Nucleus	other
ATG12	autophagy related 12	-31.874	Cytoplasm	other
TRAPPC4	trafficking protein particle complex 4	-32.118	Cytoplasm	other
NPDC1	neural proliferation, differentiation and control 1	-32.726	Extracellular Space	other
STX18	syntaxin 18	-33.085	Cytoplasm	transporter
CKS1B	CDC28 protein kinase regulatory subunit 1B	-33.141	Other	kinase
CCDC102A	coiled-coil domain containing 102A	-33.356	Other	other
LRIG3	leucine rich repeats and immunoglobulin like domains 3	-34.56	Extracellular Space	other
PIGO	phosphatidylinositol glycan anchor biosynthesis class O	-35.173	Cytoplasm	enzyme
DPPA2	developmental pluripotency associated 2	-35.442	Nucleus	other
RNASE4	ribonuclease A family member 4	-35.704	Extracellular Space	enzyme
ARRDC3	arrestin domain containing 3	-36.053	Plasma Membrane	other
HARBI1	harbinger transposase derived 1	-36.488	Cytoplasm	other
CD83	CD83 molecule	-37.124	Plasma Membrane	transmembrane receptor
POGK	pogo transposable element derived with KRAB domain	-37.247	Nucleus	other
WHRN	whirlin	-37.662	Plasma Membrane	other
ZNF346	zinc finger protein 346	-37.981	Nucleus	other	diagnosis
B4GALT3	beta-1,4-galactosyltransferase 3	-38.988	Cytoplasm	enzyme
TFCP2	transcription factor CP2	-39.374	Nucleus	transcription regulator
STAM	signal transducing adaptor molecule	-40.726	Cytoplasm	other
ADIPOR2	adiponectin receptor 2	-41.265	Plasma Membrane	transmembrane receptor			79602	68465	312670
MSRA	methionine sulfoxide reductase A	-41.527	Cytoplasm	enzyme
SLC49A4	solute carrier family 49 member 4	-42.608	Other	other
CDKN2AIP	CDKN2A interacting protein	-42.879	Nucleus	transcription regulator
SLC23A2	solute carrier family 23 member 2	-43.092	Plasma Membrane	transporter
NIT2	nitrilase family member 2	-44.975	Cytoplasm	enzyme
FN3KRP	fructosamine 3 kinase related protein	-45.257	Cytoplasm	kinase
ZNF622	zinc finger protein 622	-45.304	Nucleus	other
COL28A1	collagen type XXVIII alpha 1 chain	-45.965	Extracellular Space	other
OTUB2	OTU deubiquitinase, ubiquitin aldehyde binding 2	-46.413	Nucleus	enzyme
Ccl27a	chemokine (C-C motif) ligand 27A	-49.033	Extracellular Space	cytokine
ZNHIT3	zinc finger HIT-type containing 3	-49.697	Nucleus	transcription regulator
ZNF330	zinc finger protein 330	-50.114	Nucleus	other
DND1	DND microRNA-mediated repression inhibitor 1	-50.735	Cytoplasm	other
CUEDC2	CUE domain containing 2	-51.077	Extracellular Space	other
EGR2	early growth response 2	-51.508	Nucleus	transcription regulator
RASAL2	RAS protein activator like 2	-52.422	Extracellular Space	other
HSBP1	heat shock factor binding protein 1	-52.647	Nucleus	other
FYN	FYN proto-oncogene, Src family tyrosine kinase	-53.417	Plasma Membrane	kinase	efficacy	afatinib/dasatinib,blinatumomab/dasatinib,dasatinib,dasatinib/erlotinib,dasatinib/filgrastim,dasatinib/inotuzumab ozogamicin,dasatinib/nilotinib,dasatinib/rituximab,JNJ-26483327
TBC1D2	TBC1 domain family member 2	-53.542	Cytoplasm	other
GOLGA7	golgin A7	-54.979	Cytoplasm	other
BRIX1	biogenesis of ribosomes BRX1	-55.151	Nucleus	other
ZMYND19	zinc finger MYND-type containing 19	-55.885	Plasma Membrane	other
SSU72	SSU72 homolog, RNA polymerase II CTD phosphatase	-56.555	Other	phosphatase
RDX	radixin	-56.845	Cytoplasm	other	unspecified application
CDON	cell adhesion associated, oncogene regulated	-59.177	Plasma Membrane	other
SLC25A51	solute carrier family 25 member 51	-60.175	Cytoplasm	transporter
FADS3	fatty acid desaturase 3	-60.891	Plasma Membrane	enzyme
ENOX2	ecto-NOX disulfide-thiol exchanger 2	-62.526	Plasma Membrane	enzyme	efficacy
CNIH1	cornichon family AMPA receptor auxiliary protein 1	-63.928	Plasma Membrane	other
LIPT2	lipoyl(octanoyl) transferase 2	-64.825	Cytoplasm	enzyme
PSME1	proteasome activator subunit 1	-64.964	Cytoplasm	other
PFDN4	prefoldin subunit 4	-65.473	Cytoplasm	other
RAB11FIP5	RAB11 family interacting protein 5	-66.111	Cytoplasm	other
RSBN1L	round spermatid basic protein 1 like	-68.325	Other	other
ATOH8	atonal bHLH transcription factor 8	-69.18	Nucleus	transcription regulator
OBI1	ORC ubiquitin ligase 1	-69.479	Nucleus	enzyme
SIRT2	sirtuin 2	-69.891	Nucleus	transcription regulator
HACD1	3-hydroxyacyl-CoA dehydratase 1	-70.674	Cytoplasm	enzyme
Yaf2	YY1 associated factor 2	-71.952	Nucleus	transcription regulator
GPATCH2L	G-patch domain containing 2 like	-72.252	Other	other
ARL10	ADP ribosylation factor like GTPase 10	-76.969	Other	other
DBT	dihydrolipoamide branched chain transacylase E2	-77.035	Cytoplasm	enzyme
HLA-DMB	major histocompatibility complex, class II, DM beta	-78.206	Plasma Membrane	transmembrane receptor
LACC1	laccase domain containing 1	-78.43	Cytoplasm	enzyme
SAR1B	secretion associated Ras related GTPase 1B	-80.01	Cytoplasm	enzyme
HIGD2A	HIG1 hypoxia inducible domain family member 2A	-80.223	Cytoplasm	other
U2SURP	U2 snRNP associated SURP domain containing	-82.144	Nucleus	other
ST3GAL2	ST3 beta-galactoside alpha-2,3-sialyltransferase 2	-82.388	Cytoplasm	enzyme
ATP6V1B2	ATPase H+ transporting V1 subunit B2	-82.824	Cytoplasm	transporter	unspecified application	gallium nitrate
PIN1	peptidylprolyl cis/trans isomerase, NIMA-interacting 1	-84.283	Nucleus	enzyme
REPS1	RALBP1 associated Eps domain containing 1	-84.831	Plasma Membrane	other
PSAP	prosaposin	-84.939	Extracellular Space	enzyme	unspecified application
CIPC	CLOCK interacting pacemaker	-85.084	Nucleus	other
SUCLG2	succinate-CoA ligase GDP-forming subunit beta	-90.114	Cytoplasm	enzyme
GATAD2A	GATA zinc finger domain containing 2A	-90.223	Nucleus	transcription regulator
TTC7B	tetratricopeptide repeat domain 7B	-94.412	Other	other
MGST2	microsomal glutathione S-transferase 2	-94.752	Cytoplasm	enzyme
TMEM168	transmembrane protein 168	-97.727	Cytoplasm	other
SLC25A40	solute carrier family 25 member 40	-97.775	Cytoplasm	other
Zfp882	zinc finger protein 882	-99.452	Other	other
EIF2B3	eukaryotic translation initiation factor 2B subunit gamma	-99.87	Cytoplasm	other
C6orf89	chromosome 6 open reading frame 89	-100.844	Cytoplasm	other
ATF5	activating transcription factor 5	-101.075	Nucleus	transcription regulator
CHCHD1	coiled-coil-helix-coiled-coil-helix domain containing 1	-102.993	Nucleus	other
TMEM209	transmembrane protein 209	-104.675	Other	other
GHR	growth hormone receptor	-106.389	Plasma Membrane	transmembrane receptor		GH1,pegvisomant,prednisone/somatotropin,somatrem
HINT3	histidine triad nucleotide binding protein 3	-112.184	Cytoplasm	enzyme
MAVS	mitochondrial antiviral signaling protein	-112.556	Cytoplasm	other
RBMS2	RNA binding motif single stranded interacting protein 2	-112.654	Nucleus	other
RAVER1	ribonucleoprotein, PTB binding 1	-119.95	Nucleus	other
MEA1	male-enhanced antigen 1	-120.739	Cytoplasm	other
PDHB	pyruvate dehydrogenase E1 subunit beta	-122.11	Cytoplasm	enzyme	unspecified application
SNX5	sorting nexin 5	-130.62	Cytoplasm	transporter
EIF4EBP1	eukaryotic translation initiation factor 4E binding protein 1	-131.751	Cytoplasm	translation regulator	efficacy
TMED4	transmembrane p24 trafficking protein 4	-132.8	Cytoplasm	transporter
HIF1AN	hypoxia inducible factor 1 subunit alpha inhibitor	-134.474	Nucleus	enzyme
RPS5	ribosomal protein S5	-135.093	Cytoplasm	other
FN1	fibronectin 1	-144.155	Extracellular Space	enzyme	diagnosis,efficacy,prognosis,unspecified application	AS1409,bifikafusp alfa,iodine I 131 anti-fibronectin antibody fragment L19-SIP,L19-IL2 monoclonal antibody-cytokine fusion protein/L19TNFalpha,L19TNFalpha,ocriplasmin
CPOX	coproporphyrinogen oxidase	-151.96	Cytoplasm	enzyme
RCN3	reticulocalbin 3	-153.15	Cytoplasm	other
Rpl23a	ribosomal protein L23A	-157.527	Nucleus	other
MTA3	metastasis associated 1 family member 3	-161.224	Nucleus	transcription regulator
NANS	N-acetylneuraminate synthase	-162.88	Cytoplasm	enzyme
CARD9	caspase recruitment domain family member 9	-175.287	Cytoplasm	other	diagnosis
Spg20	spastic paraplegia 20, spartin (Troyer syndrome) homolog (human)	-176.683	Plasma Membrane	other
SOS1	SOS Ras/Rac guanine nucleotide exchange factor 1	-185.533	Cytoplasm	other		BI 1701963
CTH	cystathionine gamma-lyase	-189.624	Cytoplasm	enzyme
RNASET2	ribonuclease T2	-191.631	Cytoplasm	enzyme
GADD45A	growth arrest and DNA damage inducible alpha	-202.183	Nucleus	other	efficacy
RPL3	ribosomal protein L3	-204.755	Nucleus	other		cytarabine/daunorubicin/omacetaxine mepesuccinate,cytarabine/doxorubicin/filgrastim/omacetaxine mepesuccinate,omacetaxine mepesuccinate
NDUFB6	NADH:ubiquinone oxidoreductase subunit B6	-206.342	Cytoplasm	enzyme
CCM2	CCM2 scaffold protein	-218.388	Cytoplasm	other
TMEM43	transmembrane protein 43	-240.46	Nucleus	other
PIR	pirin	-240.517	Nucleus	transcription regulator
GPX1	glutathione peroxidase 1	-243.486	Cytoplasm	enzyme	diagnosis,efficacy
COMMD2	COMM domain containing 2	-243.687	Other	other
EPRS1	glutamyl-prolyl-tRNA synthetase 1	-246.398	Cytoplasm	enzyme
MYL6	myosin light chain 6	-250.165	Cytoplasm	enzyme
ALDH18A1	aldehyde dehydrogenase 18 family member A1	-250.418	Cytoplasm	kinase			5832	56454	361755
RPL13	ribosomal protein L13	-268.042	Nucleus	other
DIPK2A	divergent protein kinase domain 2A	-268.507	Cytoplasm	other
COX16	cytochrome c oxidase assembly factor COX16	-284.539	Cytoplasm	other
CNOT7	CCR4-NOT transcription complex subunit 7	-285.761	Nucleus	transcription regulator
CA6	carbonic anhydrase 6	-286.066	Extracellular Space	enzyme		acetazolamide,benzthiazide,chlorothiazide,chlorthalidone,hydrochlorothiazide,methazolamide,SAR566658,sulfacetamide,topiramate,trichloromethiazide
GHITM	growth hormone inducible transmembrane protein	-318.321	Cytoplasm	other	unspecified application
EIF3C	eukaryotic translation initiation factor 3 subunit C	-333.724	Cytoplasm	translation regulator	unspecified application
RBM3	RNA binding motif protein 3	-383.118	Cytoplasm	other
PRDX4	peroxiredoxin 4	-393.231	Cytoplasm	enzyme
RHOA	ras homolog family member A	-437.955	Cytoplasm	enzyme
ASNS	asparagine synthetase (glutamine-hydrolyzing)	-448.929	Cytoplasm	enzyme
MT-ND6	NADH dehydrogenase, subunit 6 (complex I)	-494.089	Cytoplasm	enzyme
RBM7	RNA binding motif protein 7	-514.898	Nucleus	other
BEX1	brain expressed X-linked 1	-516.212	Other	other
NME2	NME/NM23 nucleoside diphosphate kinase 2	-703.355	Nucleus	kinase

## Sheet: Table S3d - Genes reg - 1 pM
Table S3d Genes differentially regulated at Rg5 concentrations 1 pM
Test sample code		S5
Ginsenoside Rg5 concentration, x = - log 10,		12
Symbol	Entrez Gene Name	Expr Fold Change	Location	Type(s)	Biomarker Application(s)	Drug(s)	Entrez Gene ID for Human	Entrez Gene ID for Mouse	Entrez Gene ID for Rat
COL1A1	collagen type I alpha 1 chain	542.006	Extracellular Space	other	diagnosis	collagenase clostridium histolyticum
Scd2	stearoyl-Coenzyme A desaturase 2	510.459	Cytoplasm	enzyme
GPI	glucose-6-phosphate isomerase	510.453	Extracellular Space	enzyme	unspecified application
SLC6A6	solute carrier family 6 member 6	448.449	Plasma Membrane	transporter
CAVIN1	caveolae associated protein 1	394.291	Nucleus	transcription regulator
PGAM1	phosphoglycerate mutase 1	375.182	Cytoplasm	phosphatase
TXNIP	thioredoxin interacting protein	328.467	Cytoplasm	other
ATP5IF1	ATP synthase inhibitory factor subunit 1	320.381	Cytoplasm	other
MTAP	methylthioadenosine phosphorylase	314.279	Nucleus	enzyme	efficacy,prognosis,safety
SLC25A5	solute carrier family 25 member 5	313.814	Cytoplasm	transporter		clodronic acid
AKT1	AKT serine/threonine kinase 1	313.328	Cytoplasm	kinase	diagnosis,efficacy,response to therapy	archexin,ARQ 751,BAY1125976,capivasertib,enzastaurin,GSK690693,ipatasertib,LY2780301,miransertib,MK2206,MPT0E028,perifosine,triciribine,triciribine phosphate,uprosertib	207	11651	24185
LMNA	lamin A/C	302.436	Nucleus	other
Marcks	myristoylated alanine rich protein kinase C substrate	299.924	Plasma Membrane	other
TMEM97	transmembrane protein 97	282.549	Extracellular Space	other		CT1812
SFR1	SWI5 dependent homologous recombination repair protein 1	259.993	Nucleus	transcription regulator
TKT	transketolase	259.743	Cytoplasm	enzyme
ADRM1	adhesion regulating molecule 1	256.338	Plasma Membrane	other	unspecified application		11047	56436	65138
PRDX2	peroxiredoxin 2	252.72	Cytoplasm	enzyme
GPR137B	G protein-coupled receptor 137B	250.906	Plasma Membrane	other
CBFB	core-binding factor subunit beta	247.213	Nucleus	transcription regulator
HYOU1	hypoxia up-regulated 1	241.116	Cytoplasm	other
NPLOC4	NPL4 homolog, ubiquitin recognition factor	239.329	Nucleus	other
GCLM	glutamate-cysteine ligase modifier subunit	239.221	Cytoplasm	enzyme
PLPP2	phospholipid phosphatase 2	228.288	Plasma Membrane	phosphatase
GIPC1	GIPC PDZ domain containing family member 1	212.479	Cytoplasm	other
PTGES3	prostaglandin E synthase 3	209.83	Cytoplasm	enzyme
PTPN2	protein tyrosine phosphatase non-receptor type 2	207.96	Cytoplasm	phosphatase
RPL11	ribosomal protein L11	202.765	Cytoplasm	other
PGD	phosphogluconate dehydrogenase	196.875	Cytoplasm	enzyme
PSMD3	proteasome 26S subunit, non-ATPase 3	196.873	Cytoplasm	other
FEM1C	fem-1 homolog C	196.472	Nucleus	transcription regulator
RHOC	ras homolog family member C	194.286	Plasma Membrane	enzyme	diagnosis,prognosis
ZFP36L2	ZFP36 ring finger protein like 2	186.08	Nucleus	transcription regulator	unspecified application
TAPBP	TAP binding protein	182.513	Cytoplasm	transporter
ELOVL1	ELOVL fatty acid elongase 1	182.492	Cytoplasm	enzyme
ANAPC2	anaphase promoting complex subunit 2	180.759	Nucleus	other
CTTN	cortactin	172.497	Plasma Membrane	other	efficacy
ACAT2	acetyl-CoA acetyltransferase 2	171.893	Cytoplasm	enzyme			39	110460|224530	308100|365096
CIAO2B	cytosolic iron-sulfur assembly component 2B	162.268	Cytoplasm	other
TAB2	TGF-beta activated kinase 1 (MAP3K7) binding protein 2	154.776	Cytoplasm	other
ASPH	aspartate beta-hydroxylase	147.338	Cytoplasm	enzyme
TGFBR2	transforming growth factor beta receptor 2	144.759	Plasma Membrane	kinase		IMC-TR1
ATP6V0C	ATPase H+ transporting V0 subunit c	141.929	Cytoplasm	transporter
ATP5MC3	ATP synthase membrane subunit c locus 3	141.827	Cytoplasm	transporter
SEC23A	Sec23 homolog A, COPII coat complex component	138.931	Cytoplasm	transporter
SLC20A2	solute carrier family 20 member 2	138.443	Plasma Membrane	transporter
FBL	fibrillarin	138.188	Nucleus	enzyme
CAVIN3	caveolae associated protein 3	136.67	Cytoplasm	other
HADH	hydroxyacyl-CoA dehydrogenase	134.328	Cytoplasm	enzyme	unspecified application
NCLN	nicalin	133.511	Cytoplasm	peptidase
FZD2	frizzled class receptor 2	131.172	Plasma Membrane	G-protein coupled receptor		vantictumab,wnt-5a mimic hexapeptide foxy-5
WIPI2	WD repeat domain, phosphoinositide interacting 2	129.848	Cytoplasm	other
PRPF8	pre-mRNA processing factor 8	129.535	Nucleus	other
SOX9	SRY-box transcription factor 9	127.617	Nucleus	transcription regulator	disease progression,prognosis
ENTPD6	ectonucleoside triphosphate diphosphohydrolase 6	127.341	Cytoplasm	enzyme
LPCAT3	lysophosphatidylcholine acyltransferase 3	127.311	Plasma Membrane	enzyme
SEC24D	SEC24 homolog D, COPII coat complex component	124.969	Cytoplasm	transporter
STK35	serine/threonine kinase 35	120.887	Cytoplasm	kinase
DNAJB1	DnaJ heat shock protein family (Hsp40) member B1	120.598	Nucleus	transcription regulator
CAPN2	calpain 2	120.537	Cytoplasm	peptidase		alicapistat,BLD-2660
NOP2	NOP2 nucleolar protein	118.754	Nucleus	other
SLC35A4	solute carrier family 35 member A4	118.579	Cytoplasm	transporter
5830417I10Rik	gon-4-like pseudogene	118.314	Other	other				100302730
PPP1R35	protein phosphatase 1 regulatory subunit 35	117.504	Other	other
TBRG4	transforming growth factor beta regulator 4	114.009	Cytoplasm	other
POP5	POP5 homolog, ribonuclease P/MRP subunit	113.439	Nucleus	enzyme
ALDH9A1	aldehyde dehydrogenase 9 family member A1	112.663	Cytoplasm	enzyme			223	56752	64040
BAG3	BAG cochaperone 3	111.398	Cytoplasm	other
SYS1	SYS1 golgi trafficking protein	110.24	Cytoplasm	other
BCAR1	BCAR1 scaffold protein, Cas family member	110.032	Plasma Membrane	enzyme	prognosis
MRPL58	mitochondrial ribosomal protein L58	109.518	Cytoplasm	enzyme
CDT1	chromatin licensing and DNA replication factor 1	106.722	Nucleus	other
VCAN	versican	106.126	Extracellular Space	other
CHPF	chondroitin polymerizing factor	105.411	Cytoplasm	enzyme
CMTM7	CKLF like MARVEL transmembrane domain containing 7	105.298	Extracellular Space	cytokine
AURKA	aurora kinase A	103.483	Nucleus	kinase	efficacy	alisertib,AMG 900,AT-9283,CYC 116,danusertib,ilorasertib,MK 5108,MLN8054,SNS 314,TAS-119,tozasertib,TTP607
XPNPEP1	X-prolyl aminopeptidase 1	101.985	Cytoplasm	peptidase
UBTF	upstream binding transcription factor	100.022	Nucleus	transcription regulator
RNF44	ring finger protein 44	97.219	Other	other
NUP107	nucleoporin 107	96.239	Nucleus	other
BYSL	bystin like	95.627	Nucleus	other
KIF3C	kinesin family member 3C	95.391	Cytoplasm	other
PDXK	pyridoxal kinase	94.779	Cytoplasm	kinase
DDX23	DEAD-box helicase 23	94.669	Nucleus	enzyme
DAPK3	death associated protein kinase 3	91.75	Cytoplasm	kinase
ANXA6	annexin A6	91.318	Plasma Membrane	ion channel
TSSC4	tumor suppressing subtransferable candidate 4	89.629	Other	other
SFSWAP	splicing factor SWAP	88.661	Nucleus	other
Luzp4 (includes others)	leucine zipper protein 4	88.26	Other	other
ERGIC1	endoplasmic reticulum-golgi intermediate compartment 1	87.891	Cytoplasm	other
TULP4	TUB like protein 4	86.07	Cytoplasm	transcription regulator
NUP85	nucleoporin 85	84.935	Cytoplasm	other
GTF3C6	general transcription factor IIIC subunit 6	84.095	Nucleus	transcription regulator
BLMH	bleomycin hydrolase	82.973	Cytoplasm	peptidase
NFKB2	nuclear factor kappa B subunit 2	81.511	Nucleus	transcription regulator
DNAJB6	DnaJ heat shock protein family (Hsp40) member B6	80.763	Nucleus	transcription regulator
RRP1B	ribosomal RNA processing 1B	79.105	Nucleus	transcription regulator
PRMT2	protein arginine methyltransferase 2	78.394	Nucleus	enzyme
AACS	acetoacetyl-CoA synthetase	78.256	Cytoplasm	enzyme			65985	78894	65984
NPEPPS	aminopeptidase puromycin sensitive	77.824	Cytoplasm	peptidase	unspecified application
FBH1	F-box DNA helicase 1	77.284	Nucleus	enzyme
WDR6	WD repeat domain 6	77.181	Cytoplasm	other
PLAU	plasminogen activator, urokinase	74.589	Extracellular Space	peptidase	disease progression,efficacy,prognosis
SAFB	scaffold attachment factor B	74.257	Nucleus	other
Pakap	paralemmin A kinase anchor protein	72.982	Other	other
MAP1S	microtubule associated protein 1S	72.741	Cytoplasm	enzyme
KCTD20	potassium channel tetramerization domain containing 20	72.637	Cytoplasm	other
DELE1	DAP3 binding cell death enhancer 1	72.154	Cytoplasm	other
CIAO1	cytosolic iron-sulfur assembly component 1	69.61	Nucleus	transcription regulator
MARVELD3	MARVEL domain containing 3	69.496	Plasma Membrane	other
NDST1	N-deacetylase and N-sulfotransferase 1	68.683	Cytoplasm	enzyme
TRAF2	TNF receptor associated factor 2	68.374	Cytoplasm	enzyme	diagnosis
INTS12	integrator complex subunit 12	68.153	Nucleus	other
SYVN1	synoviolin 1	67.252	Cytoplasm	transporter
GORASP2	golgi reassembly stacking protein 2	66.7	Cytoplasm	other
GPD2	glycerol-3-phosphate dehydrogenase 2	65.68	Cytoplasm	enzyme
DDRGK1	DDRGK domain containing 1	63.045	Extracellular Space	other
ARMC7	armadillo repeat containing 7	62.872	Cytoplasm	other
LTO1	LTO1 maturation factor of ABCE1	61.762	Nucleus	other
SLC41A2	solute carrier family 41 member 2	61.607	Plasma Membrane	transporter
LPAR1	lysophosphatidic acid receptor 1	61.029	Plasma Membrane	G-protein coupled receptor
HSD17B11	hydroxysteroid 17-beta dehydrogenase 11	59.906	Cytoplasm	enzyme
COMMD7	COMM domain containing 7	58.671	Cytoplasm	other
1700071K01Rik	RIKEN cDNA 1700071K01 gene	57.942	Other	other				237880
PDCD10	programmed cell death 10	56.986	Cytoplasm	other
SRR	serine racemase	56.884	Cytoplasm	enzyme
MYO9B	myosin IXB	56.067	Cytoplasm	enzyme
NRF1	nuclear respiratory factor 1	55.885	Nucleus	transcription regulator
PNRC1	proline rich nuclear receptor coactivator 1	55.508	Nucleus	other
ADAMTS2	ADAM metallopeptidase with thrombospondin type 1 motif 2	55.197	Extracellular Space	peptidase	diagnosis,efficacy		9509	216725	287899
MPPED1	metallophosphoesterase domain containing 1	55.062	Other	other
UTP20	UTP20 small subunit processome component	53.434	Nucleus	other
KCNAB2	potassium voltage-gated channel subfamily A regulatory beta subunit 2	52.69	Plasma Membrane	ion channel
PLPP7	phospholipid phosphatase 7 (inactive)	52.574	Nucleus	phosphatase
5031425E22Rik	RIKEN cDNA 5031425E22 gene	51.826	Other	other				269630
PPM1E	protein phosphatase, Mg2+/Mn2+ dependent 1E	51.32	Nucleus	phosphatase
TPCN1	two pore segment channel 1	51.134	Plasma Membrane	ion channel
SRXN1	sulfiredoxin 1	50.628	Cytoplasm	enzyme
JUP	junction plakoglobin	49.563	Plasma Membrane	other	diagnosis,unspecified application
ABCA2	ATP binding cassette subfamily A member 2	49.324	Plasma Membrane	transporter			20	11305	79248
KCNK3	potassium two pore domain channel subfamily K member 3	49.25	Plasma Membrane	ion channel		amiodarone,doxapram,halothane,nicorandil
CHMP2B	charged multivesicular body protein 2B	48.975	Cytoplasm	other
KDM4A	lysine demethylase 4A	48.693	Nucleus	transcription regulator
IRAK1	interleukin 1 receptor associated kinase 1	48.542	Plasma Membrane	kinase
Gm9780 (includes others)	predicted gene 9780	47.884	Other	other
MAP3K10	mitogen-activated protein kinase kinase kinase 10	46.556	Cytoplasm	kinase
DLX1	distal-less homeobox 1	46.35	Nucleus	transcription regulator	unspecified application
ISYNA1	inositol-3-phosphate synthase 1	46.163	Cytoplasm	enzyme
CDC42EP4	CDC42 effector protein 4	44.7	Cytoplasm	other
SUN1	Sad1 and UNC84 domain containing 1	44.58	Nucleus	other
PARP4	poly(ADP-ribose) polymerase family member 4	44.495	Cytoplasm	enzyme
POLR3G	RNA polymerase III subunit G	44.101	Nucleus	enzyme
PRPF38A	pre-mRNA processing factor 38A	43.702	Nucleus	other
FURIN	furin, paired basic amino acid cleaving enzyme	43.689	Cytoplasm	peptidase	unspecified application	furin inhibitor,hexa-D-arginine,nona-D-arginine amide
CD300LD	CD300 molecule like family member d	43.668	Plasma Membrane	other
ST6GALNAC4	ST6 N-acetylgalactosaminide alpha-2,6-sialyltransferase 4	43.335	Cytoplasm	enzyme
ACOT4	acyl-CoA thioesterase 4	43.151	Cytoplasm	enzyme			122970	171282	681337
LCLAT1	lysocardiolipin acyltransferase 1	42.458	Cytoplasm	enzyme
Slc35a2	solute carrier family 35 (UDP-galactose transporter), member A2	42.073	Cytoplasm	transporter
DHODH	dihydroorotate dehydrogenase (quinone)	41.495	Cytoplasm	enzyme		ASLAN003,BAY2402234,brequinar,dichloroallyl lawsone,leflunomide,teriflunomide,vidofludimus
TSR2	TSR2 ribosome maturation factor	40.877	Other	other
LRP8	LDL receptor related protein 8	40.739	Plasma Membrane	transmembrane receptor
MOB3A	MOB kinase activator 3A	40.557	Other	other
RAB3GAP2	RAB3 GTPase activating non-catalytic protein subunit 2	39.369	Cytoplasm	enzyme
AI413582	expressed sequence AI413582	39.038	Other	other				106672
H2BC9	H2B clustered histone 9	38.206	Nucleus	other
SEMA3B	semaphorin 3B	37.581	Extracellular Space	other
ASB16	ankyrin repeat and SOCS box containing 16	36.571	Cytoplasm	other
TBC1D16	TBC1 domain family member 16	36.561	Extracellular Space	other
ADAT1	adenosine deaminase tRNA specific 1	36.013	Other	enzyme			23536	30947	690810
ELP1	elongator complex protein 1	35.993	Cytoplasm	other
UPK1B	uroplakin 1B	34.419	Plasma Membrane	other
NELFCD	negative elongation factor complex member C/D	33.821	Nucleus	other
CARHSP1	calcium regulated heat stable protein 1	33.523	Cytoplasm	transcription regulator
PTPRE	protein tyrosine phosphatase receptor type E	32.985	Plasma Membrane	phosphatase
CYREN	cell cycle regulator of NHEJ	32.933	Other	other
VGF	VGF nerve growth factor inducible	32.83	Extracellular Space	growth factor	unspecified application
E2F3	E2F transcription factor 3	31.879	Nucleus	transcription regulator	unspecified application
PLPP3	phospholipid phosphatase 3	30.443	Plasma Membrane	phosphatase
G630093K05Rik	RIKEN cDNA G630093K05 gene	29.941	Other	other
C1S	complement C1s	28.627	Extracellular Space	peptidase		SERPING1,sutimlimab
KIAA0895L	KIAA0895 like	28.288	Other	other
PIP5K1B	phosphatidylinositol-4-phosphate 5-kinase type 1 beta	28.271	Cytoplasm	kinase
LZTS2	leucine zipper tumor suppressor 2	28.131	Cytoplasm	other
AMOT	angiomotin	27.976	Plasma Membrane	other
Krt90	keratin 90	27.754	Cytoplasm	other
FAM161A	FAM161 centrosomal protein A	27.661	Cytoplasm	other
C2orf69	chromosome 2 open reading frame 69	27.631	Other	other
GSG1L2	GSG1 like 2	27.495	Other	other
DNAJC12	DnaJ heat shock protein family (Hsp40) member C12	27.389	Cytoplasm	other
SLC23A3	solute carrier family 23 member 3	27.3	Other	transporter
CLDN11	claudin 11	27.04	Plasma Membrane	other
DNAH2	dynein axonemal heavy chain 2	26.606	Cytoplasm	other
G6PC	glucose-6-phosphatase catalytic subunit	25.904	Cytoplasm	phosphatase	unspecified application
CCNJ	cyclin J	25.809	Nucleus	other
USP27X	ubiquitin specific peptidase 27 X-linked	25.049	Other	peptidase
N6AMT1	N-6 adenine-specific DNA methyltransferase 1	24.925	Cytoplasm	enzyme
ETV5	ETS variant transcription factor 5	24.838	Nucleus	transcription regulator
ARHGEF33	Rho guanine nucleotide exchange factor 33	24.612	Other	other
SKA3	spindle and kinetochore associated complex subunit 3	23.723	Nucleus	other
AHR	aryl hydrocarbon receptor	23.221	Nucleus	ligand-dependent nuclear receptor		BAY2416964,KYN-175	196	11622	25690
MCRIP2	MAPK regulated corepressor interacting protein 2	22.863	Cytoplasm	other
BHLHE22	basic helix-loop-helix family member e22	22.6	Nucleus	transcription regulator
SND1	staphylococcal nuclease and tudor domain containing 1	22.358	Nucleus	enzyme	unspecified application
TULP1	TUB like protein 1	22.336	Nucleus	transcription regulator
CATSPER4	cation channel sperm associated 4	21.896	Cytoplasm	transporter
ERICH5	glutamate rich 5	21.752	Other	other
CORIN	corin, serine peptidase	21.742	Plasma Membrane	peptidase
BNIP5	BCL2 interacting protein 5	21.289	Other	other
CHST3	carbohydrate sulfotransferase 3	20.991	Cytoplasm	enzyme
MUC20	mucin 20, cell surface associated	20.367	Plasma Membrane	other
TRIM31	tripartite motif containing 31	20.307	Cytoplasm	enzyme
PDP2	pyruvate dehyrogenase phosphatase catalytic subunit 2	20.23	Cytoplasm	phosphatase
IQCK	IQ motif containing K	19.854	Other	other
IRS1	insulin receptor substrate 1	19.691	Cytoplasm	enzyme	efficacy
IPP	intracisternal A particle-promoted polypeptide	-19.638	Cytoplasm	other
ZCCHC10	zinc finger CCHC-type containing 10	-19.942	Other	other
HOXA6	homeobox A6	-20.684	Nucleus	transcription regulator
FAM76A	family with sequence similarity 76 member A	-20.85	Nucleus	other
TARBP1	TAR (HIV-1) RNA binding protein 1	-21.407	Nucleus	transcription regulator
Gm7337	DAZ interacting protein 1 pseudogene	-21.416	Other	other
GBX2	gastrulation brain homeobox 2	-21.692	Nucleus	transcription regulator
Gm5784	predicted gene 5784	-21.721	Other	other
NTRK3	neurotrophic receptor tyrosine kinase 3	-21.872	Plasma Membrane	kinase	unspecified application	belizatinib,bevacizumab/entrectinib,DS-6051b,entrectinib,larotrectinib,lorlatinib,LOXO-195,NOV1601,ONO-7579,PLX7486,pralsetinib,repotrectinib
SPARCL1	SPARC like 1	-22.29	Extracellular Space	other	disease progression
NME7	NME/NM23 family member 7	-22.543	Cytoplasm	kinase
KDM6B	lysine demethylase 6B	-22.703	Extracellular Space	enzyme
SH3BGRL2	SH3 domain binding glutamate rich protein like 2	-23.008	Nucleus	other
KCNH7	potassium voltage-gated channel subfamily H member 7	-23.268	Plasma Membrane	ion channel		dextromethorphan/quinidine,procainamide,quinidine
SERPINA1	serpin family A member 1	-24.824	Extracellular Space	other	diagnosis,unspecified application
NR2C1	nuclear receptor subfamily 2 group C member 1	-24.969	Nucleus	transcription regulator
Arhgap33os	Rho GTPase activating protein 33, opposite strand	-25.199	Other	other
CLEC10A	C-type lectin domain containing 10A	-25.259	Plasma Membrane	other
DICER1	dicer 1, ribonuclease III	-25.657	Cytoplasm	enzyme
NOL4	nucleolar protein 4	-26.026	Nucleus	other
Gm4836 (includes others)	predicted gene 4836	-26.298	Nucleus	other
COIL	coilin	-26.742	Nucleus	enzyme
MYO1F	myosin IF	-26.792	Cytoplasm	other
FGD2	FYVE, RhoGEF and PH domain containing 2	-26.921	Cytoplasm	other
KLHL2	kelch like family member 2	-27.095	Cytoplasm	other
Zfp933	zinc finger protein 933	-27.464	Other	other
CRTAM	cytotoxic and regulatory T cell molecule	-28.985	Plasma Membrane	other
PAPOLG	poly(A) polymerase gamma	-29.419	Nucleus	enzyme
SH2B2	SH2B adaptor protein 2	-29.595	Cytoplasm	other
Gm16440 (includes others)	predicted gene 16440	-30.046	Other	other
COG7	component of oligomeric golgi complex 7	-30.521	Cytoplasm	transporter
Gm5930	predicted gene 5930	-30.701	Other	other
ARIH2	ariadne RBR E3 ubiquitin protein ligase 2	-30.728	Nucleus	enzyme	unspecified application
GNPDA1	glucosamine-6-phosphate deaminase 1	-30.733	Cytoplasm	enzyme
TCIM	transcriptional and immune response regulator	-31.245	Nucleus	other
KBTBD8	kelch repeat and BTB domain containing 8	-31.558	Cytoplasm	other
SNUPN	snurportin 1	-32.872	Nucleus	other
Spint3	serine peptidase inhibitor, Kunitz type, 3	-33.314	Other	other
ENOX2	ecto-NOX disulfide-thiol exchanger 2	-33.692	Plasma Membrane	enzyme	efficacy
KLHDC4	kelch domain containing 4	-34.347	Other	other
Speer4a (includes others)	spermatogenesis associated glutamate (E)-rich protein 4A	-34.676	Nucleus	other
TMX4	thioredoxin related transmembrane protein 4	-34.864	Cytoplasm	enzyme
RFTN2	raftlin family member 2	-35.227	Other	other
PRR5	proline rich 5	-35.513	Cytoplasm	other
POGK	pogo transposable element derived with KRAB domain	-35.674	Nucleus	other
SLC7A11	solute carrier family 7 member 11	-36.333	Plasma Membrane	transporter		(4S)-4-(3-(18F)fluoropropyl)-L-glutamate,N-acetyl-L-cysteine
DNM1L	dynamin 1 like	-36.841	Cytoplasm	enzyme
TFB2M	transcription factor B2, mitochondrial	-40.473	Cytoplasm	enzyme
ZFAND5	zinc finger AN1-type containing 5	-41.364	Nucleus	other
SLC35A3	solute carrier family 35 member A3	-43.944	Cytoplasm	transporter
INF2	inverted formin 2	-43.974	Cytoplasm	other
PHF14	PHD finger protein 14	-46.125	Nucleus	other
MFN1	mitofusin 1	-47.542	Cytoplasm	enzyme
VWA5A	von Willebrand factor A domain containing 5A	-47.858	Nucleus	other
LRCH1	leucine rich repeats and calponin homology domain containing 1	-48.131	Cytoplasm	other
PBX3	PBX homeobox 3	-48.523	Nucleus	transcription regulator
RPP14	ribonuclease P/MRP subunit p14	-49.58	Nucleus	enzyme
HOXB5	homeobox B5	-49.608	Nucleus	transcription regulator	diagnosis
PTBP3	polypyrimidine tract binding protein 3	-50.206	Nucleus	other
WNT4	Wnt family member 4	-50.526	Extracellular Space	cytokine
FXYD5	FXYD domain containing ion transport regulator 5	-51.507	Plasma Membrane	ion channel
APOBEC1	apolipoprotein B mRNA editing enzyme catalytic subunit 1	-55.784	Cytoplasm	enzyme
DDX50	DExD-box helicase 50	-56.115	Nucleus	enzyme
MKS1	MKS transition zone complex subunit 1	-57.912	Cytoplasm	other
Gm3383 (includes others)	predicted gene 5797	-58.156	Other	other
Zranb2	zinc finger, RAN-binding domain containing 2	-58.458	Nucleus	other
DNMT3A	DNA methyltransferase 3 alpha	-58.473	Nucleus	enzyme	unspecified application
C11orf1	chromosome 11 open reading frame 1	-59.843	Nucleus	other
E2F5	E2F transcription factor 5	-59.871	Nucleus	transcription regulator
DHRS9	dehydrogenase/reductase 9	-60.388	Cytoplasm	enzyme
RPL38	ribosomal protein L38	-62.038	Cytoplasm	other
HLA-DMB	major histocompatibility complex, class II, DM beta	-62.121	Plasma Membrane	transmembrane receptor
NR1D1	nuclear receptor subfamily 1 group D member 1	-63.131	Nucleus	ligand-dependent nuclear receptor
TVP23B	trans-golgi network vesicle protein 23 homolog B	-66.387	Other	other
H1-2	H1.2 linker histone, cluster member	-66.661	Nucleus	other
RSBN1L	round spermatid basic protein 1 like	-67.083	Other	other
LRCH3	leucine rich repeats and calponin homology domain containing 3	-70.017	Cytoplasm	other
Rcor3	REST corepressor 3	-70.665	Other	other
C12orf29	chromosome 12 open reading frame 29	-71.015	Other	other
UBE2E1	ubiquitin conjugating enzyme E2 E1	-72.041	Cytoplasm	enzyme
ITGA6	integrin subunit alpha 6	-72.143	Plasma Membrane	transmembrane receptor
RAB18	RAB18, member RAS oncogene family	-74.18	Cytoplasm	enzyme
Supt20	SPT20 SAGA complex component	-74.446	Nucleus	other
CCNC	cyclin C	-75.829	Nucleus	other
KIAA0319L	KIAA0319 like	-76.38	Cytoplasm	other
PCP2	Purkinje cell protein 2	-77.582	Cytoplasm	other
RNF149	ring finger protein 149	-78.89	Cytoplasm	enzyme
OSTM1	osteoclastogenesis associated transmembrane protein 1	-82.021	Cytoplasm	other
MBTPS2	membrane bound transcription factor peptidase, site 2	-82.15	Cytoplasm	peptidase
TMEM209	transmembrane protein 209	-82.678	Other	other
RELL1	RELT like 1	-83.535	Plasma Membrane	other
KLF9	Kruppel like factor 9	-86.427	Nucleus	transcription regulator
FAR1	fatty acyl-CoA reductase 1	-86.608	Cytoplasm	enzyme
UBE2W	ubiquitin conjugating enzyme E2 W	-87.714	Nucleus	enzyme
OSGEP	O-sialoglycoprotein endopeptidase	-89.783	Nucleus	peptidase
GNPNAT1	glucosamine-phosphate N-acetyltransferase 1	-89.999	Cytoplasm	enzyme
XRCC5	X-ray repair cross complementing 5	-90.261	Nucleus	enzyme	unspecified application
LUC7L2	LUC7 like 2, pre-mRNA splicing factor	-92.422	Nucleus	other
PDZD8	PDZ domain containing 8	-94.696	Extracellular Space	other
Gm14410	predicted gene 14410	-95.069	Other	other
IFT74	intraflagellar transport 74	-95.978	Cytoplasm	other
MBD5	methyl-CpG binding domain protein 5	-99.604	Nucleus	other
TTC13	tetratricopeptide repeat domain 13	-103.808	Other	other
MAGOH	mago homolog, exon junction complex subunit	-103.929	Nucleus	other
MZT1	mitotic spindle organizing protein 1	-104.165	Cytoplasm	other
GATAD1	GATA zinc finger domain containing 1	-107.378	Nucleus	transcription regulator
CKAP5	cytoskeleton associated protein 5	-107.791	Nucleus	transcription regulator
CPSF2	cleavage and polyadenylation specific factor 2	-111.649	Nucleus	other
DBF4	DBF4 zinc finger	-114.702	Nucleus	kinase
RALGAPA1	Ral GTPase activating protein catalytic subunit alpha 1	-114.733	Cytoplasm	other
RPA2	replication protein A2	-127.071	Nucleus	other
SCPEP1	serine carboxypeptidase 1	-131.416	Cytoplasm	peptidase
ALDH18A1	aldehyde dehydrogenase 18 family member A1	-136.21	Cytoplasm	kinase			5832	56454	361755
FGFR1OP2	FGFR1 oncogene partner 2	-140.554	Cytoplasm	other
CCDC66	coiled-coil domain containing 66	-142.899	Cytoplasm	other
ABHD17B	abhydrolase domain containing 17B, depalmitoylase	-143.886	Plasma Membrane	peptidase			51104	226016	309399
MTERF3	mitochondrial transcription termination factor 3	-149.136	Cytoplasm	other
RIF1	replication timing regulatory factor 1	-150.55	Nucleus	other
PICALM	phosphatidylinositol binding clathrin assembly protein	-152.652	Cytoplasm	other
EVL	Enah/Vasp-like	-153.766	Plasma Membrane	other
NDUFA6	NADH:ubiquinone oxidoreductase subunit A6	-156.159	Cytoplasm	enzyme
IGBP1	immunoglobulin binding protein 1	-157.928	Cytoplasm	phosphatase
ID1	inhibitor of DNA binding 1, HLH protein	-158.057	Nucleus	transcription regulator	disease progression
MED13L	mediator complex subunit 13L	-158.214	Nucleus	other
RDX	radixin	-160.954	Cytoplasm	other	unspecified application
GAS2L3	growth arrest specific 2 like 3	-164.75	Other	other
NXT2	nuclear transport factor 2 like export factor 2	-169.324	Nucleus	transporter
SPIRE1	spire type actin nucleation factor 1	-172.393	Cytoplasm	other
TRIP12	thyroid hormone receptor interactor 12	-181.162	Cytoplasm	enzyme
NUDT21	nudix hydrolase 21	-182.599	Nucleus	other
VBP1	VHL binding protein 1	-185.932	Cytoplasm	other	unspecified application
SYMPK	symplekin	-186.553	Cytoplasm	other
CTH	cystathionine gamma-lyase	-200.865	Cytoplasm	enzyme
SMURF2	SMAD specific E3 ubiquitin protein ligase 2	-200.909	Cytoplasm	enzyme
UBA3	ubiquitin like modifier activating enzyme 3	-206.458	Cytoplasm	enzyme
HINT1	histidine triad nucleotide binding protein 1	-207.73	Nucleus	enzyme	prognosis
FBXW5	F-box and WD repeat domain containing 5	-212.133	Cytoplasm	other
CENPI	centromere protein I	-221.804	Nucleus	other
RFK	riboflavin kinase	-223.104	Cytoplasm	kinase
PAPOLA	poly(A) polymerase alpha	-225.448	Nucleus	enzyme
Rpl23a	ribosomal protein L23A	-225.504	Nucleus	other
ASNSD1	asparagine synthetase domain containing 1	-232.339	Other	enzyme
SRPK1	SRSF protein kinase 1	-232.808	Nucleus	kinase		endovion
ASNS	asparagine synthetase (glutamine-hydrolyzing)	-242.062	Cytoplasm	enzyme
AP1G1	adaptor related protein complex 1 subunit gamma 1	-252.571	Cytoplasm	other
BZW1	basic leucine zipper and W2 domains 1	-256.225	Cytoplasm	translation regulator
USP14	ubiquitin specific peptidase 14	-264.025	Cytoplasm	peptidase		VLX1570
RBM3	RNA binding motif protein 3	-269.56	Cytoplasm	other
LIN7C	lin-7 homolog C, crumbs cell polarity complex component	-270.064	Cytoplasm	other
CA6	carbonic anhydrase 6	-274.682	Extracellular Space	enzyme		acetazolamide,benzthiazide,chlorothiazide,chlorthalidone,hydrochlorothiazide,methazolamide,SAR566658,sulfacetamide,topiramate,trichloromethiazide
CAPZA2	capping actin protein of muscle Z-line subunit alpha 2	-288.075	Cytoplasm	other
EIF3C	eukaryotic translation initiation factor 3 subunit C	-310.023	Cytoplasm	translation regulator	unspecified application
Rpl31-ps12	ribosomal protein L31, pseudogene 1 2	-324.955	Other	other
Cops2	COP9 signalosome subunit 2	-369.562	Nucleus	transcription regulator
ALDH1L2	aldehyde dehydrogenase 1 family member L2	-373.36	Cytoplasm	enzyme			160428	216188	299699
GDI2	GDP dissociation inhibitor 2	-384.466	Cytoplasm	other
HIPK2	homeodomain interacting protein kinase 2	-396.709	Nucleus	kinase
BAZ1B	bromodomain adjacent to zinc finger domain 1B	-431.09	Nucleus	transcription regulator
MT-ND6	NADH dehydrogenase, subunit 6 (complex I)	-442.549	Cytoplasm	enzyme
RPL17	ribosomal protein L17	-469.495	Cytoplasm	other
RHOA	ras homolog family member A	-492.446	Cytoplasm	enzyme

## Sheet: Table S3e- Genes reg 1 fM
Table S3e Genes differentially regulated at Rg5 concentrations 1 fM
Test sample code		S6
Ginsenoside Rg5 concentration, x = - log 10,		12
Symbol	Entrez Gene Name	Expr Fold Change	Location	Type(s)	Biomarker Application(s)	Drug(s)	Entrez Gene ID for Human	Entrez Gene ID for Mouse	Entrez Gene ID for Rat
FSCN1	fascin actin-bundling protein 1	500.742	Cytoplasm	other	unspecified application
COL1A1	collagen type I alpha 1 chain	492.015	Extracellular Space	other	diagnosis	collagenase clostridium histolyticum
GEMIN5	gem nuclear organelle associated protein 5	357.64	Nucleus	other
METTL23	methyltransferase like 23	339.752	Cytoplasm	other
AKT1	AKT serine/threonine kinase 1	336.532	Cytoplasm	kinase	diagnosis,efficacy,response to therapy	archexin,ARQ 751,BAY1125976,capivasertib,enzastaurin,GSK690693,ipatasertib,LY2780301,miransertib,MK2206,MPT0E028,perifosine,triciribine,triciribine phosphate,uprosertib	207	11651	24185
EIF4A1	eukaryotic translation initiation factor 4A1	328.666	Cytoplasm	translation regulator
LMNA	lamin A/C	294.452	Nucleus	other
PRELID1	PRELI domain containing 1	277.339	Cytoplasm	other
RPL39	ribosomal protein L39	275.012	Cytoplasm	other
SIGMAR1	sigma non-opioid intracellular receptor 1	267.12	Plasma Membrane	transmembrane receptor		acetaminophen/pentazocine,brompheniramine/dextromethorphan/pseudoephedrine,bupropion/dextromethorphan,bupropion/naltrexone,carbinoxamine/dextromethorphan/pseudoephedrine,chlorpheniramine/dextromethorphan/phenylephrine,dextromethorphan,dextromethorphan/morphine,dextromethorphan/promethazine,dextromethorphan/quinidine,dihydrocodeine,etorphine,hydromorphone,morphine/naltrexone,naloxone,naloxone/pent…
AK2	adenylate kinase 2	253.056	Cytoplasm	kinase			204	11637	24184
PSMD1	proteasome 26S subunit, non-ATPase 1	251.726	Cytoplasm	other		bortezomib,bortezomib/cladribine/rituximab,bortezomib/dexamethasone,bortezomib/dexamethasone/doxorubicin,bortezomib/dexamethasone/lenalidomide,bortezomib/dexamethasone/pomalidomide,bortezomib/dexamethasone/rituximab,bortezomib/dexamethasone/thalidomide,bortezomib/doxorubicin,bortezomib/fulvestrant,bortezomib/lenalidomide,bortezomib/paclitaxel,bortezomib/prednisone,bortezomib/rituximab,bortezomib/…
RPL26	ribosomal protein L26	251.229	Cytoplasm	other
PFDN1	prefoldin subunit 1	239.871	Cytoplasm	other
MYADM	myeloid associated differentiation marker	238.601	Nucleus	other
Tpm1	tropomyosin 1, alpha	235.47	Plasma Membrane	other
PGD	phosphogluconate dehydrogenase	229.813	Cytoplasm	enzyme
Ccl2	chemokine (C-C motif) ligand 2	221.076	Extracellular Space	cytokine	unspecified application
CWC27	CWC27 spliceosome associated cyclophilin	209.99	Nucleus	enzyme
SF3B5	splicing factor 3b subunit 5	203.267	Nucleus	other
MCM7	minichromosome maintenance complex component 7	202.273	Nucleus	enzyme	diagnosis,disease progression
ZFP36L2	ZFP36 ring finger protein like 2	199.394	Nucleus	transcription regulator	unspecified application
ACTR1A	actin related protein 1A	198.391	Cytoplasm	other			10121	54130	294010
UTP3	UTP3 small subunit processome component	194.703	Nucleus	other
QDPR	quinoid dihydropteridine reductase	188.982	Cytoplasm	enzyme
CTDSP1	CTD small phosphatase 1	188.279	Nucleus	phosphatase
EPB41L2	erythrocyte membrane protein band 4.1 like 2	184.21	Plasma Membrane	other
PREB	prolactin regulatory element binding	183.328	Nucleus	transcription regulator
ABLIM1	actin binding LIM protein 1	178.69	Cytoplasm	other			3983	226251	307989
ACAT2	acetyl-CoA acetyltransferase 2	176.761	Cytoplasm	enzyme			39	110460|224530	308100|365096
TBRG4	transforming growth factor beta regulator 4	175.723	Cytoplasm	other
CBFB	core-binding factor subunit beta	173.232	Nucleus	transcription regulator
LPAR1	lysophosphatidic acid receptor 1	169.508	Plasma Membrane	G-protein coupled receptor
LSM7	LSM7 homolog, U6 small nuclear RNA and mRNA degradation associated	169.187	Nucleus	other
ELK3	ETS transcription factor ELK3	168.004	Nucleus	transcription regulator
TAB2	TGF-beta activated kinase 1 (MAP3K7) binding protein 2	166.897	Cytoplasm	other
RAD23B	RAD23 homolog B, nucleotide excision repair protein	164.592	Nucleus	other
MRPL37	mitochondrial ribosomal protein L37	164.428	Cytoplasm	enzyme
GRHPR	glyoxylate and hydroxypyruvate reductase	164.3	Cytoplasm	enzyme
AMOTL2	angiomotin like 2	162.627	Plasma Membrane	other
AIMP2	aminoacyl tRNA synthetase complex interacting multifunctional protein 2	161.694	Plasma Membrane	other			7965	231872	288480
COPZ1	COPI coat complex subunit zeta 1	157.024	Cytoplasm	transporter
HYOU1	hypoxia up-regulated 1	153.396	Cytoplasm	other
TBRG1	transforming growth factor beta regulator 1	148.413	Nucleus	other
CDCA3	cell division cycle associated 3	145.883	Cytoplasm	other
ABHD2	abhydrolase domain containing 2, acylglycerol lipase	144.869	Cytoplasm	enzyme			11057	54608	293050
ERN1	endoplasmic reticulum to nucleus signaling 1	144.279	Cytoplasm	kinase
TAPBP	TAP binding protein	140.828	Cytoplasm	transporter
LAMC1	laminin subunit gamma 1	137.917	Extracellular Space	other
IDNK	IDNK gluconokinase	135.102	Cytoplasm	other
TINAGL1	tubulointerstitial nephritis antigen like 1	133.908	Extracellular Space	transporter
FDFT1	farnesyl-diphosphate farnesyltransferase 1	132.45	Cytoplasm	enzyme	unspecified application	lapaquistat,zoledronic acid
PGP	phosphoglycolate phosphatase	131.536	Cytoplasm	enzyme
SF3B4	splicing factor 3b subunit 4	125.895	Nucleus	other
FPGS	folylpolyglutamate synthase	125.673	Cytoplasm	enzyme		pralatrexate
CPSF1	cleavage and polyadenylation specific factor 1	125.014	Nucleus	other
TESK1	testis associated actin remodelling kinase 1	123.992	Nucleus	kinase
TET3	tet methylcytosine dioxygenase 3	120.994	Nucleus	enzyme
Nrg1	neuregulin 1	120.727	Plasma Membrane	other
SOGA3	SOGA family member 3	118.472	Other	other
C14orf119	chromosome 14 open reading frame 119	112.887	Other	other
MSMO1	methylsterol monooxygenase 1	112.5	Cytoplasm	enzyme
MARVELD3	MARVEL domain containing 3	111.678	Plasma Membrane	other
IRF2	interferon regulatory factor 2	111.295	Nucleus	transcription regulator
CHP1	calcineurin like EF-hand protein 1	111.282	Cytoplasm	other
ISCA1	iron-sulfur cluster assembly 1	111.063	Cytoplasm	other
DPH2	diphthamide biosynthesis 2	110.71	Cytoplasm	enzyme
SMIM10L1	small integral membrane protein 10 like 1	107.624	Other	other
HSD17B10	hydroxysteroid 17-beta dehydrogenase 10	107.554	Cytoplasm	enzyme
SLCO3A1	solute carrier organic anion transporter family member 3A1	106.924	Plasma Membrane	transporter
BEX3	brain expressed X-linked 3	104.367	Cytoplasm	other
TIMP1	TIMP metallopeptidase inhibitor 1	103.964	Extracellular Space	cytokine	diagnosis,disease progression,efficacy,prognosis,unspecified application
NABP2	nucleic acid binding protein 2	103.075	Nucleus	other
Slc25a1	solute carrier family 25 (mitochondrial carrier, citrate transporter), member 1	102.653	Cytoplasm	transporter
SLC41A2	solute carrier family 41 member 2	100.233	Plasma Membrane	transporter
Ccl9	chemokine (C-C motif) ligand 9	100.135	Extracellular Space	cytokine	unspecified application
CNN2	calponin 2	100.1	Cytoplasm	other
Pwp2	PWP2 periodic tryptophan protein homolog (yeast)	99.245	Nucleus	other
FBXO2	F-box protein 2	97.33	Cytoplasm	enzyme
Cyp2d9 (includes others)	cytochrome P450, family 2, subfamily d, polypeptide 9	97.205	Cytoplasm	other
ATOX1	antioxidant 1 copper chaperone	95.907	Cytoplasm	transporter
CSNK2A1	casein kinase 2 alpha 1	95.79	Nucleus	kinase
MGMT	O-6-methylguanine-DNA methyltransferase	95.249	Nucleus	enzyme	diagnosis,efficacy,prognosis	O6-alkylguanine-DNA alkyltransferase inhibitor,O6-benzylguanine
KLF10	Kruppel like factor 10	93.417	Nucleus	transcription regulator
PRPF31	pre-mRNA processing factor 31	93.329	Nucleus	other
PCGF2	polycomb group ring finger 2	93.238	Nucleus	transcription regulator	prognosis
VPS25	vacuolar protein sorting 25 homolog	92.96	Cytoplasm	other
Snrpa (includes others)	small nuclear ribonucleoprotein polypeptide A	91.654	Nucleus	other
TGFBR2	transforming growth factor beta receptor 2	91.02	Plasma Membrane	kinase		IMC-TR1
UBE2O	ubiquitin conjugating enzyme E2 O	90.205	Nucleus	enzyme
COG3	component of oligomeric golgi complex 3	89.875	Cytoplasm	other
WIPI2	WD repeat domain, phosphoinositide interacting 2	89.406	Cytoplasm	other
PPP1R7	protein phosphatase 1 regulatory subunit 7	89.289	Nucleus	phosphatase
GNPTG	N-acetylglucosamine-1-phosphate transferase subunit gamma	88.983	Cytoplasm	enzyme
CDT1	chromatin licensing and DNA replication factor 1	88.694	Nucleus	other
PSMC5	proteasome 26S subunit, ATPase 5	87.998	Nucleus	transcription regulator
BCL9	BCL9 transcription coactivator	87.242	Nucleus	other
CRYAB	crystallin alpha B	85.931	Nucleus	other	diagnosis,disease progression,prognosis,unspecified application
DYNLT1	dynein light chain Tctex-type 1	85.927	Cytoplasm	other
NUDC	nuclear distribution C, dynein complex regulator	85.816	Cytoplasm	other
SHPRH	SNF2 histone linker PHD RING helicase	85.038	Nucleus	transcription regulator
Setd1b	SET domain containing 1B	85.031	Nucleus	other
DUSP7	dual specificity phosphatase 7	83.179	Cytoplasm	phosphatase
RPF2	ribosome production factor 2 homolog	81.738	Nucleus	other
TRIM56	tripartite motif containing 56	80.528	Cytoplasm	enzyme
SUMF2	sulfatase modifying factor 2	80.261	Cytoplasm	other
RAB29	RAB29, member RAS oncogene family	78.661	Plasma Membrane	enzyme
EXOSC10	exosome component 10	78.342	Nucleus	kinase
RTKN2	rhotekin 2	78.34	Plasma Membrane	other
NDUFS2	NADH:ubiquinone oxidoreductase core subunit S2	77.589	Cytoplasm	enzyme
SATB2	SATB homeobox 2	77.586	Nucleus	transcription regulator	unspecified application
MAP3K14	mitogen-activated protein kinase kinase kinase 14	77.095	Cytoplasm	kinase
CTDNEP1	CTD nuclear envelope phosphatase 1	76.305	Extracellular Space	phosphatase
HOMER1	homer scaffold protein 1	76.011	Plasma Membrane	other
ICMT	isoprenylcysteine carboxyl methyltransferase	75.641	Cytoplasm	enzyme
PCNX3	pecanex 3	75.54	Other	other
LRIG1	leucine rich repeats and immunoglobulin like domains 1	75.451	Extracellular Space	other
BLOC1S1	biogenesis of lysosomal organelles complex 1 subunit 1	75.385	Cytoplasm	other
CHMP2B	charged multivesicular body protein 2B	74.941	Cytoplasm	other
RUNDC1	RUN domain containing 1	72.521	Other	other
PRCC	proline rich mitotic checkpoint control factor	72.301	Nucleus	other
PRPF19	pre-mRNA processing factor 19	71.946	Nucleus	enzyme
SLC25A19	solute carrier family 25 member 19	71.659	Cytoplasm	transporter
CCDC9B	coiled-coil domain containing 9B	70.941	Other	other
4931440P22Rik	RIKEN cDNA 4931440P22 gene	69.886	Other	other				71004
GLE1	GLE1 RNA export mediator	68.775	Nucleus	other
CHID1	chitinase domain containing 1	68.652	Extracellular Space	other
CHERP	calcium homeostasis endoplasmic reticulum protein	68.467	Cytoplasm	other
POP1	POP1 homolog, ribonuclease P/MRP subunit	68.103	Nucleus	enzyme
MXRA8	matrix remodeling associated 8	67.626	Cytoplasm	other
FARP1	FERM, ARH/RhoGEF and pleckstrin domain protein 1	66.531	Plasma Membrane	other
CRTC2	CREB regulated transcription coactivator 2	65.799	Nucleus	other
SLC4A1AP	solute carrier family 4 member 1 adaptor protein	65.755	Nucleus	transporter
ARHGEF12	Rho guanine nucleotide exchange factor 12	65.549	Cytoplasm	other
MMS19	MMS19 homolog, cytosolic iron-sulfur assembly component	64.648	Nucleus	transcription regulator
CLIC6	chloride intracellular channel 6	64.137	Plasma Membrane	ion channel
TTC33	tetratricopeptide repeat domain 33	63.823	Other	other
Prr13	proline rich 13	62.568	Other	other
WDR72	WD repeat domain 72	61.649	Cytoplasm	other
MAP3K10	mitogen-activated protein kinase kinase kinase 10	61.627	Cytoplasm	kinase
HES5	hes family bHLH transcription factor 5	60.348	Nucleus	transcription regulator
NUB1	negative regulator of ubiquitin like proteins 1	60.316	Nucleus	other
MRPL9	mitochondrial ribosomal protein L9	60.208	Cytoplasm	translation regulator	unspecified application
PRDM5	PR/SET domain 5	59.956	Nucleus	transcription regulator
ZNF580	zinc finger protein 580	59.152	Nucleus	transcription regulator
TBC1D16	TBC1 domain family member 16	58.742	Extracellular Space	other
BCL2L1	BCL2 like 1	58.206	Cytoplasm	other	efficacy,prognosis
CYS1	cystin 1	58.149	Cytoplasm	transcription regulator
COL13A1	collagen type XIII alpha 1 chain	58.025	Plasma Membrane	other		collagenase clostridium histolyticum
DHODH	dihydroorotate dehydrogenase (quinone)	58.015	Cytoplasm	enzyme		ASLAN003,BAY2402234,brequinar,dichloroallyl lawsone,leflunomide,teriflunomide,vidofludimus
PRPS2	phosphoribosyl pyrophosphate synthetase 2	57.087	Cytoplasm	kinase
SMAGP	small cell adhesion glycoprotein	56.282	Cytoplasm	other
G0S2	G0/G1 switch 2	56.093	Cytoplasm	other
NLN	neurolysin	55.67	Cytoplasm	peptidase
NQO1	NAD(P)H quinone dehydrogenase 1	53.687	Cytoplasm	enzyme	diagnosis,unspecified application
NFKB2	nuclear factor kappa B subunit 2	52.512	Nucleus	transcription regulator
KCTD16	potassium channel tetramerization domain containing 16	52.025	Plasma Membrane	other
COL8A2	collagen type VIII alpha 2 chain	50.749	Extracellular Space	other		collagenase clostridium histolyticum
TFR2	transferrin receptor 2	50.624	Plasma Membrane	transporter
GLG1	golgi glycoprotein 1	50.264	Cytoplasm	other
SLC25A38	solute carrier family 25 member 38	49.456	Cytoplasm	other
TMEM208	transmembrane protein 208	49.308	Other	other
TEX261	testis expressed 261	49.251	Extracellular Space	other
DLEC1	DLEC1 cilia and flagella associated protein	49.141	Cytoplasm	other
UVSSA	UV stimulated scaffold protein A	48.738	Nucleus	other
NCBP2AS2	NCBP2 antisense 2 (head to head)	48.697	Other	other
ZDHHC14	zinc finger DHHC-type palmitoyltransferase 14	48.581	Cytoplasm	enzyme
PLPP6	phospholipid phosphatase 6	48.479	Plasma Membrane	phosphatase
GFRA4	GDNF family receptor alpha 4	47.218	Plasma Membrane	transmembrane receptor
TBC1D4	TBC1 domain family member 4	46.876	Cytoplasm	other
HMGCL	3-hydroxy-3-methylglutaryl-CoA lyase	46.711	Cytoplasm	enzyme
PPP1R1B	protein phosphatase 1 regulatory inhibitor subunit 1B	46.632	Cytoplasm	phosphatase
MOSPD3	motile sperm domain containing 3	46.121	Other	other
NOL4L	nucleolar protein 4 like	45.5	Other	other
OTOF	otoferlin	45.205	Plasma Membrane	other
TSC22D4	TSC22 domain family member 4	44.836	Nucleus	transcription regulator
CDPF1	cysteine rich DPF motif domain containing 1	44.829	Extracellular Space	other
TACO1	translational activator of cytochrome c oxidase I	44.555	Cytoplasm	other
POLM	DNA polymerase mu	43.806	Nucleus	enzyme
POLR2H	RNA polymerase II subunit H	43.441	Nucleus	enzyme
BIN3	bridging integrator 3	43.353	Cytoplasm	other
Gm12666	predicted gene 12666	43.02	Other	other
CSNK2A2	casein kinase 2 alpha 2	42.908	Cytoplasm	kinase
HTR2C	5-hydroxytryptamine receptor 2C	42.004	Plasma Membrane	G-protein coupled receptor	safety	agomelatine,apomorphine,aripiprazole,asenapine,blonanserin,buspirone,caffeine/ergotamine,chlorprothixene,clomipramine,cyproheptadine,dexamethasone/olanzapine,dihydroergotamine,doxepin,epinastine,ergotamine,fenfluramine,fenfluramine/phentermine,fluoxetine/olanzapine,lisuride,lorcaserin,methysergide,mirtazapine,nefazodone,olanzapine,opipramol,paliperidone,pimavanserin,quetiapine,risperidone,sertind…
DHX16	DEAH-box helicase 16	40.605	Nucleus	enzyme
1700001F09Rik (includes others)	predicted gene 5800	39.847	Other	other				71826|385138|545047|666186|666207|666253|666376|666420|666485|666561|666647|666660|666675|666678|666723|100041106|100042055|100042342|100504444|100861719|102631639|102631744|102634269|102634304|102634872|102635067|102635261|102635554|102636283|102636509|102636873|102636948|102637812|102638116|102639794|102640847|102640955|108168153|108168156
UFSP1	UFM1 specific peptidase 1 (inactive)	39.574	Cytoplasm	enzyme
ZNF597	zinc finger protein 597	39.501	Nucleus	transcription regulator
MRPS17	mitochondrial ribosomal protein S17	39.43	Cytoplasm	other
SMOX	spermine oxidase	39.202	Cytoplasm	enzyme
RAD54L2	RAD54 like 2	39.161	Nucleus	transcription regulator
ELP6	elongator acetyltransferase complex subunit 6	38.908	Other	other
PPP6R1	protein phosphatase 6 regulatory subunit 1	38.797	Cytoplasm	other
Fbxl22	F-box and leucine-rich repeat protein 22	38.648	Other	enzyme
DNAH9	dynein axonemal heavy chain 9	38.499	Cytoplasm	other
INO80B	INO80 complex subunit B	37.317	Nucleus	other
NKD1	NKD inhibitor of WNT signaling pathway 1	37.175	Other	other
CLCN7	chloride voltage-gated channel 7	36.887	Plasma Membrane	ion channel
TXNRD1	thioredoxin reductase 1	36.815	Cytoplasm	enzyme		arsenic trioxide,arsenic trioxide/cytarabine/methotrexate,arsenic trioxide/daunorubicin/tretinoin,arsenic trioxide/gemtuzumab ozogamicin/tretinoin,arsenic trioxide/idarubicin/tretinoin,arsenic trioxide/tretinoin,auranofin,ethaselen
ELP3	elongator acetyltransferase complex subunit 3	36.802	Nucleus	enzyme
Krtap4-8	keratin associated protein 4-8	36.664	Other	other
VEZT	vezatin, adherens junctions transmembrane protein	36.419	Plasma Membrane	other
NECAP1	NECAP endocytosis associated 1	36.063	Plasma Membrane	other
TNFRSF19	TNF receptor superfamily member 19	35.977	Plasma Membrane	transmembrane receptor
NEIL2	nei like DNA glycosylase 2	35.408	Nucleus	enzyme
KCNMB1	potassium calcium-activated channel subfamily M regulatory beta subunit 1	35.223	Plasma Membrane	ion channel		tedisamil
TAZ	tafazzin	35.145	Nucleus	enzyme
Gm10638	predicted gene 10638	34.976	Other	other
HMCES	5-hydroxymethylcytosine binding, ES cell specific	34.813	Nucleus	other
SPG7	SPG7 matrix AAA peptidase subunit, paraplegin	33.903	Cytoplasm	peptidase
BCL6	BCL6 transcription repressor	33.862	Nucleus	transcription regulator	diagnosis,efficacy,prognosis,unspecified application
TRARG1	trafficking regulator of GLUT4 (SLC2A4) 1	33.703	Plasma Membrane	other
ACSF3	acyl-CoA synthetase family member 3	33.662	Cytoplasm	enzyme			197322	257633	498962
VWA5B2	von Willebrand factor A domain containing 5B2	33.461	Other	other
MBD3	methyl-CpG binding domain protein 3	33.187	Nucleus	other
BCO1	beta-carotene oxygenase 1	32.883	Cytoplasm	enzyme
MGST3	microsomal glutathione S-transferase 3	32.718	Cytoplasm	enzyme
TCAF1	TRPM8 channel associated factor 1	32.526	Plasma Membrane	other
EVC2	EvC ciliary complex subunit 2	32.147	Extracellular Space	other
KCNJ14	potassium inwardly rectifying channel subfamily J member 14	32.004	Plasma Membrane	ion channel
SGCA	sarcoglycan alpha	31.898	Plasma Membrane	other
CBY3	chibby family member 3	31.689	Other	other
KIAA2013	KIAA2013	31.663	Other	other
RPH3A	rabphilin 3A	31.322	Plasma Membrane	transporter
IQCC	IQ motif containing C	31.213	Other	other
SLC25A41	solute carrier family 25 member 41	31.156	Cytoplasm	transporter
FOXI1	forkhead box I1	31.048	Nucleus	transcription regulator
KRTAP10-7	keratin associated protein 10-7	30.714	Cytoplasm	other
CLN3	CLN3 lysosomal/endosomal transmembrane protein, battenin	30.694	Cytoplasm	other
SYCP2L	synaptonemal complex protein 2 like	29.66	Nucleus	other
ALOX5AP	arachidonate 5-lipoxygenase activating protein	29.546	Plasma Membrane	other			241	11690	29624
DENND2B	DENN domain containing 2B	29.431	Cytoplasm	enzyme
METTL24	methyltransferase like 24	28.895	Other	other
PHLDB3	pleckstrin homology like domain family B member 3	27.971	Other	other
DHRSX	dehydrogenase/reductase X-linked	27.675	Extracellular Space	enzyme
[truncated: 224 more rows]

## Sheet: Table S3f  - Genes reg 10 aM
Table S3f Genes differentially regulated at Rg5 concentrations 10 aM
[truncated: 341 more rows]

[truncated: 1 more sheets: Table S3g - Genes Reg 1 aM]
