# Supplementary material for: Network Pharmacology of Red Ginseng (Part I): Effects of Ginsenoside Rg5 at Physiological and Sub-Physiological Concentrations
Source: Preprints.org preprint supplement (doi:10.20944/preprints202109.0281.v1), 2021-09-16
Supplement: Supplementary file 3 [file supplementary]

## Supplement 1.

**Table S1. The pharmacological activity of Ginsenoside Rg5 in *in vitro* experiments**

| Reference         | Ginsenosides                                  | In vitro conc. $\mu$ M         | In vitro conc. $\mu$ g/ml             | Cells                                                                          | Results                                                                                                                                                                                                                                                                                                                                                                                                                                                                                                                                               |
|-------------------|-----------------------------------------------|--------------------------------|---------------------------------------|--------------------------------------------------------------------------------|-------------------------------------------------------------------------------------------------------------------------------------------------------------------------------------------------------------------------------------------------------------------------------------------------------------------------------------------------------------------------------------------------------------------------------------------------------------------------------------------------------------------------------------------------------|
| Wu et al, 2009    | <b>Rg5</b><br><br><b>Rb1</b><br><br><b>Rc</b> | 1<br><br>0.01, 0.1<br><br>0.01 | 0.767<br><br>0.011, 0.11<br><br>0.108 | primary medium spiny striatal neuronal cultures (MSN) from the YAC128 HD mouse | Ginsenosides Rg5, Rb1 and Rc protected neurons from glutamate-induced apoptosis in vitro Huntington's disease (HD) assay.<br>Ginsenosides Rd, Re, Rg3, Rh1, Re, Rd, Rk1, Rh4 and Rk3 were inactive or exerted toxic effects in MSN cultures.                                                                                                                                                                                                                                                                                                          |
| Choi et al., 2017 | <b>Rg5</b>                                    | 26-52<br><br>Toxic in 78-104   | 20-40<br><br>Toxic in 60-80           | hippocampal HT22 cells                                                         | Rg5 exhibits a neuroprotective effect in heat stress-induced apoptosis.<br><b>Rg5 decreases</b> the production of thermal stress-induced <b>increase of NO</b> , which is an oxidative stress marker, <b>Rg5 reduces</b> antioxidant enzymes <b>HO-1/Nrf2</b> and <b>glutathione reductase</b> production and <b>AchE</b> activity in thermal stress-exposed HT22 cells.<br>Rg5 prevents thermal stress-induced inhibition of <b>CREB</b> , <b>BDNF</b> , and <b>GSK3b</b> , <b>increasing their production</b> in thermal stress-exposed HT22 cells. |
| Cho et al, 2015   | <b>Rg5</b>                                    | 10<br>20                       | 7.7<br>15.4                           | Human umbilical vein endothelial cells                                         | Rg5 promotes angiogenesis and vasorelaxation by <b>activating</b> signal transduction pathways downstream of <b>IGF-1R</b> , including <b>ERK</b> , <b>FAK</b> , <b>Akt/eNOS/NO</b> , and Gi-mediated phospholipase C/Ca2/eNOS dimerization pathways. The vasodilative activity of Rg5 was mediated by the eNOS/NO/cGMP axis.                                                                                                                                                                                                                         |
| Yang et al, 2017  | <b>Rg5</b>                                    | 0.1<br>1<br>10                 | -<br>0.767<br>7.67                    | Neonatal rat ventricular myocytes                                              | Rg5 regulation of mitochondrial dysfunctions through <b>Akt activation</b> , and <b>increased ATP production</b> .                                                                                                                                                                                                                                                                                                                                                                                                                                    |
| Kim et al., 2015  | <b>Rg5</b>                                    | 25-100                         | 19-96                                 | breast cancer cells (MCF-7)                                                    | Rg5 <b>promotes breast cancer cell (MCF-7) apoptosis</b> by:<br><ul style="list-style-type: none"> <li><b>increasing expression of p53, p21WAF1/CIP1 and p15INK4B</b></li> <li><b>decreasing expression of Cyclin D1, Cyclin E2, and CDK4</b></li> </ul>                                                                                                                                                                                                                                                                                              |
| Liu et al., 2019  | <b>Rg5</b>                                    | 100-200                        | 77-154                                | human gastric cancer cells                                                     | Ginsenoside Rg5 induces G2/M phase arrest, apoptosis, and autophagy via <b>activating ROS-mediated MAPK</b> pathways in human gastric cancer                                                                                                                                                                                                                                                                                                                                                                                                          |

|                    |                                                                    |          |              |                                                                      |                                                                                                                                                                                                                                                                                       |
|--------------------|--------------------------------------------------------------------|----------|--------------|----------------------------------------------------------------------|---------------------------------------------------------------------------------------------------------------------------------------------------------------------------------------------------------------------------------------------------------------------------------------|
| Song et al., 2021  | <b>Rg5</b>                                                         | 50       | 38           | HeLa, A549 and 293T cancer cells                                     | Rg5 inhibits cancer cell migration by <b>inhibiting the NF-<math>\kappa</math>B</b> and erythropoietin-producing hepatocellular receptor A2 signaling pathways                                                                                                                        |
| Kim et al, 2019    | <b>Rg5</b>                                                         | 20<br>40 | 15.4<br>30.8 | Human umbilical vein endothelial cells                               | Rg5 <b>suppressed</b> the production of TNF- $\alpha$ and IL-6 and the <b>activation of NF-<math>\kappa</math>B and ERK 1/2</b> by HMGB1-mediated septic responses. Rg5 reduced HMGB1 release in LPS-activated HUVECs via <b>activation the SIRT1-mediated</b> deacetylation of HMGB1 |
| Ahn et al, 2016    | <b>Rg5</b>                                                         |          |              | RAW264.7 Macrophages and human epidermal keratinocytes - HaCaT cells | Rg5 suppresses <b>NF-<math>\kappa</math>B/p38 MAPK/STAT1</b> signaling                                                                                                                                                                                                                |
| Park et al, 2015   | <b>Rg5</b>                                                         |          |              | Pig Kidney Epithelial LLC-PK1 cells                                  | Rg5 ameliorates renal cell damage by <b>inhibiting inflammation and preventing apoptosis</b>                                                                                                                                                                                          |
| Liang et al., 2015 | <b>Rg5</b>                                                         | 1.25-20  | 1-15         | human cervical cancer cells                                          | Rg5 induces apoptosis and DNA damage                                                                                                                                                                                                                                                  |
| Cheng et al., 2019 | <b>Rg5</b><br><b>Rb1</b><br><b>Rg3</b><br><b>Rg1</b><br><b>Rh2</b> | 131      | 100          | PC12 cells                                                           | <b>Rg5 inhibits</b> reactive oxygen species (ROS) and apoptosis                                                                                                                                                                                                                       |

CREB, cAMP-response element-binding protein; GR, glutathione reductase; HO-1, heme oxygenase-1

**Table S2. Doses, bioavailability and the maximal concentration of Ginsenosides in blood of human subjects and animals in pharmacokinetic studies of Ginseng**

| Reference         | Gin-seno-sides                               | Conc. in blood                                          | Conc. in blood                                               | Bioavaila-bility              | Human daily dose Ginseng dry preparation | Human saily dose, Ginseno-sides         | In vivo dose of dry preparation, mice/<br>rats/<br>dogs | Corres-ponding dose of Ginseng dry preparation in humans |
|-------------------|----------------------------------------------|---------------------------------------------------------|--------------------------------------------------------------|-------------------------------|------------------------------------------|-----------------------------------------|---------------------------------------------------------|----------------------------------------------------------|
| Units             |                                              | nM                                                      | ng/ml                                                        | %                             | mg                                       | mg                                      | mg/kg                                                   | mg                                                       |
| Xu et al., 2003   | Rb1<br>Rg1                                   | 61447<br>9504                                           | 47130<br>7290                                                | 4.35<br>18.4                  |                                          |                                         | 600                                                     | 5800                                                     |
| Chen et al., 2016 | Rb1<br>Rc<br>Rd<br>Re                        | 104-195<br>13-26<br>13-26<br>4-6.5                      | 80-150<br>10-20<br>10-20<br>3-5                              |                               |                                          |                                         | 454                                                     | 14700                                                    |
| Ma et al., 2021   | Rg5<br>Rk1                                   |                                                         |                                                              | 0.97<br>0.67                  |                                          |                                         |                                                         |                                                          |
| Yoo et al., 2021  | Rg5<br>Rk1<br>Rg3<br>Ck<br>Rb1<br>Rh2        | 2-10<br>1-4<br>2-10<br>15<br>2-4<br>2-22                | 1.4-7.6<br>0.7-2.8<br>1.6-7.3<br>11.7<br>1.8-2.8<br>1.6-16.9 |                               | 9000                                     | 7-73<br>1-33<br>5-39<br>-<br>18-49<br>- |                                                         |                                                          |
| Zhou et al., 2017 | Rg5<br>Rk1<br>Rg3<br>Ck<br>Rb1<br>Rh2<br>Rh3 | 80.8<br>48.2<br>100.4<br>48.2<br>275.1<br>328.6<br>35.2 | 62<br>37<br>77<br>37<br>211<br>252<br>27                     |                               |                                          |                                         | 4000                                                    | 39000                                                    |
| Kim et al., 2013  | Rb1<br>Ck                                    | 5.1<br>11.0                                             | 3.9<br>8.4                                                   |                               | 9000                                     |                                         |                                                         |                                                          |
| Kim et al., 2018  | Rb1<br>Rg3<br>Ck<br>Rh2<br>Gin<br>seng       |                                                         |                                                              | 4.3<br>2.63<br>35.0<br>5,4, 6 |                                          |                                         | 4.3<br>2.63<br>35.0<br>5,4, 6<br>1000                   | 9730                                                     |
| Won et al., 2019  | Rb1<br>Rg1<br>Rh2<br>Ginseng                 |                                                         |                                                              | 4.35<br>2.63<br>6.4           |                                          |                                         | 4.35<br>2.63<br>6.4<br>1000                             | 9730                                                     |

**Table S4. The pharmacological activity of Ginsenoside Rg5 in *in vivo* experiments**

| First author, year | Experimental animals     | Dose of Rg5, mg/kg | Corresponding human dose of Red Ginseng dry root, mg /BW | Disease model                               | Effect                                                                                                                                                                                                                                                                                                                                                                                                                                                                                                                                                                                                                                                 |
|--------------------|--------------------------|--------------------|----------------------------------------------------------|---------------------------------------------|--------------------------------------------------------------------------------------------------------------------------------------------------------------------------------------------------------------------------------------------------------------------------------------------------------------------------------------------------------------------------------------------------------------------------------------------------------------------------------------------------------------------------------------------------------------------------------------------------------------------------------------------------------|
| Cheng et al., 2019 | Male Sprague-Dawley rats | 10                 | 5000                                                     | Neurodegenerative Disorders                 | Rg5 protects the brain against ischemic injury <i>in vivo</i> , <b>reducing</b> cerebral ischemic injury, cerebral infarction volume, brain neurological dysfunction of ischemia-reperfusion.<br>The neuroprotective mechanism is associated with <b>inhibition of the expression of Toll-like receptor 4 (TLR4)</b> , nuclear transcription factor P65 ( <b>NF-<math>\kappa</math>B</b> ), the expression of interleukines <b>IL-1<math>\beta</math></b> , <b>IL-6</b> and <b>TNF-<math>\alpha</math></b> and silencing information regulator ( <b>SIRT1</b> ) in the hippocampal region of rats                                                      |
| Chu et al, 2014    | Male Wistar rats         | 5<br>10<br>20      | 2500<br>5000<br>10000                                    | Neurodegenerative Disorders                 | Rg5 improved cognitive dysfunction and attenuated neuroinflammatory responses in streptozotocin (STZ)-induced memory impaired rats.<br>Ginsenoside Rg5: <ul style="list-style-type: none"> <li><b>decreased</b> levels of cytokines <b>TNF-<math>\alpha</math></b> and <b>IL-1<math>\beta</math></b> and <b>acetylcholinesterase (AChE)</b> activity, but</li> <li><b>enhanced</b> choline acetyltransferase (<b>ChAT</b>) activity, the expressions of insulin-like growth factors 1 (<b>IGF-1</b>) brain derived neurotrophic factor (<b>BDNF</b>) and A<math>\beta</math> deposition in the hippocampus and cerebral cortex of STZ rats.</li> </ul> |
| Kim et al, 2013    | Male ICR mice            | 10                 | 2500                                                     | Neurodegenerative Disorders                 | Ginsenoside Rg5 protects memory deficit by <b>inhibiting AChE activity</b> and <b>increasing BDNF expression</b> and <b>CREB activation</b>                                                                                                                                                                                                                                                                                                                                                                                                                                                                                                            |
| Shao et al, 2018   | Male Kunming mice        |                    |                                                          | Mood and behavioral disorders<br>Depression | Ginsenoside Rg5 can exert sedative and hypnotic effects by affecting the GABA nervous system and the serotonin nervous system.<br>Rg5 reduce the locomotor activity of mice and promote the sleep quality index, the sleep latency and prolong the sleep time of mice. Furthermore, Rg5 augmented the <b>GABA/Glu ratio</b> , up-regulating the expression of the <b>GABAA receptor and the GABAB receptor</b> .                                                                                                                                                                                                                                       |
| Yang et al, 2017   | Male ICR mice            | 50                 | 12000                                                    | Metabolic disorders<br>Cardioprotection     | Ginsenoside Rg5 increases cardiomyocyte resistance to ischemic injury                                                                                                                                                                                                                                                                                                                                                                                                                                                                                                                                                                                  |

|                  |                       |                      |               |                                 |                                                                                                                                                                                                                                                                                                                                                                                                                                                                                                                                |
|------------------|-----------------------|----------------------|---------------|---------------------------------|--------------------------------------------------------------------------------------------------------------------------------------------------------------------------------------------------------------------------------------------------------------------------------------------------------------------------------------------------------------------------------------------------------------------------------------------------------------------------------------------------------------------------------|
| Xiao et al, 2017 | Male C57BL/6J mice    | 50                   | 12000         | Metabolic disorders<br>Diabetes | <p>Ginsenoside Rg5 Inhibits Succinate-induced Lipolysis in Adipose Tissue and Prevents Muscle Insulin Resistance.</p> <p>Rg5 treatment <b>reduced</b> cellular energy charge, suppressed Endoplasmatic Reticulum stress, , inflammation and <b>cAMP/PKA</b> activation, contributing to lipolysis and insulin resistance.</p> <p>Ginsenoside Rg5 treatment <b>suppressed NLRP3</b> inflammasome activation, preserved PDE3B expression and then <b>reduced cAMP</b> accumulation, contributing to inhibition of lipolysis.</p> |
| Zhu et al, 2020  | C57BL/6 diabetic mice | 30<br>60             | 7000<br>14000 | Metabolic disorders<br>Diabetes | <p>Rg5 attenuated renal injury in diabetic mice by <b>inhibiting</b> oxidative stress and <b>NLRP3</b> inflammasome activation to reduce inflammatory responses including ROS production, oxidative stress markers (MDA, SOD, and GSH-PX), Nox4 and the expression levels of the NLRP3 inflammasome (NLRP3, ASC, and Caspase-1), the inflammatory cytokines IL-1<math>\beta</math> and IL-18, the expression of NF-kB and the phosphorylation of p38 MAPK in kidney</p>                                                        |
| Kim et al, 2019  | Male C57BL/6 mice     | 0.061<br>1.1 $\mu$ M | 15            | Inflammation                    | <p>Rg5 inhibited HMGB1-mediated hyperpermeability, leukocyte migration, the sepsis-related mortality, and tissue injury in mice.</p>                                                                                                                                                                                                                                                                                                                                                                                           |

## References

- An, X., Fu, R., Ma, P., Ma, X., & Fan, D. Ginsenoside Rk1 inhibits cell proliferation and promotes apoptosis in lung squamous cell carcinoma by calcium signaling pathway. *RSC advances*, 2019, 9, 25107-25118. doi: 10.1039/c9ra05037j
- Chen S, Xu HQ, Zhang J, Wang CX, Liu JQ, Peng LH, Cheng JL, Liu A. A systematic study of the dissolution and relative bioavailability of four ginsenosides in the form of ultrafine granular powder, common powder and traditional pieces of *Panax quinquefolius* L, in vitro and in beagles. *J Ethnopharmacol*. 2016 Jun 5;185:9-16. doi: 10.1016/j.jep.2016.03.032. Epub 2016 Mar 11. PMID: 26976765.
- Cheng Z, Zhang M, Ling C, Zhu Y, Ren H, Hong C, Qin J, Liu T, Wang J. Neuroprotective Effects of Ginsenosides against Cerebral Ischemia. *Molecules*. 2019 Mar 20;24(6):1102. doi: 10.3390/molecules24061102. PMID: 30897756; PMCID: PMC6471240.
- Choi SY, Kim KJ, Song JH, Lee BY. Ginsenoside Rg5 prevents apoptosis by modulating heme-oxygenase-1/nuclear factor E2-related factor 2 signaling and alters the expression of cognitive impairment-associated genes in thermal stress-exposed HT22 cells. *J Ginseng Res*. 2018 Apr;42(2):225-228. doi: 10.1016/j.jgr.2017.02.002. Epub 2017 Feb 28. PMID: 29719470; PMCID: PMC5926500.
- Hong Y, Fan D. Ginsenoside Rk1 induces cell cycle arrest and apoptosis in MDA-MB-231 triple negative breast cancer cells. *Toxicology*. 2019 Apr 15;418:22-31. doi: 10.1016/j.tox.2019.02.010. Epub 2019 Feb 21. PMID: 30797898.
- Hong Y, Fan D. Ginsenoside Rk1 induces cell death through ROS-mediated PTEN/PI3K/Akt/mTOR signaling pathway in MCF-7 cells, *Journal of Functional Foods*. 2019; 57: 255-265. <https://doi.org/10.1016/j.jff.2019.04.019>.
- Kim H, Lee JH, Kim JE, Kim YS, Ryu CH, Lee HJ, Kim HM, Jeon H, Won HJ, Lee JY, Lee J. Micro-/nano-sized delivery systems of ginsenosides for improved systemic bioavailability. *J Ginseng Res*. 2018 Jul;42(3):361-369. doi: 10.1016/j.jgr.2017.12.003. Epub 2018 Jan 9. PMID: 29983618; PMCID: PMC6026383.
- Kim HK. Pharmacokinetics of ginsenoside Rb1 and its metabolite compound K after oral administration of Korean Red Ginseng extract. *J Ginseng Res*. 2013 Oct;37(4):451-6. doi: 10.5142/jgr.2013.37.451. PMID: 24235859; PMCID: PMC3825860.
- Kim SJ, Kim AK. Anti-breast cancer activity of Fine Black ginseng (*Panax ginseng* Meyer) and ginsenoside Rg5. *J Ginseng Res*. 2015 Apr;39(2):125-34. doi: 10.1016/j.jgr.2014.09.003. Epub 2014 Oct 18. PMID: 26045685; PMCID: PMC4452536.
- Liang LD, He T, Du TW, Fan YG, Chen DS, Wang Y. Ginsenoside-Rg5 induces apoptosis and DNA damage in human cervical cancer cells. *Mol Med Rep*. 2015 Feb;11(2):940-6. doi: 10.3892/mmr.2014.2821. Epub 2014 Oct 30. PMID: 25355274; PMCID: PMC4262516.
- Liu Y, Fan D. Ginsenoside Rg5 induces apoptosis and autophagy via the inhibition of the PI3K/Akt pathway against breast cancer in a mouse model. *Food Funct*. 2018 Nov 14;9(11):5513-5527. doi: 10.1039/c8fo01122b. PMID: 30207362.
- Liu Y, Fan D. Ginsenoside Rg5 induces G2/M phase arrest, apoptosis and autophagy via regulating ROS-mediated MAPK pathways against human gastric cancer. *Biochem Pharmacol*. 2019 Oct;168:285-304. doi: 10.1016/j.bcp.2019.07.008. Epub 2019 Jul 10. PMID: 31301277.
- Ma C, Lin Q, Xue Y, Ju Z, Deng G, Liu W, Sun Y, Guan H, Cheng X, Wang C. Pharmacokinetic studies of ginsenosides Rk1 and Rg5 in rats by UFLC-MS/MS. *Biomed Chromatogr*. 2021 Mar 2:e5108. doi: 10.1002/bmc.5108. Epub ahead of print. PMID: 33650162.

- Pan W, Xue B, Yang C, Miao L, Zhou L, Chen Q, Cai Q, Liu Y, Liu D, He H, Zhang Y, Yin T, Tang X. Biopharmaceutical characters and bioavailability improving strategies of ginsenosides. *Fitoterapia*. 2018 Sep;129:272-282. doi: 10.1016/j.fitote.2018.06.001. Epub 2018 Jun 5. PMID: 29883635.
- Sharma A, Lee HJ. Ginsenoside Compound K: Insights into Recent Studies on Pharmacokinetics and Health-Promoting Activities. *Biomolecules*. 2020 Jul 10;10(7):1028. doi: 10.3390/biom10071028. PMID: 32664389; PMCID: PMC7407392.
- Song L, Yang F, Wang Z, Yang L, Zhou Y. Ginsenoside Rg5 inhibits cancer cell migration by inhibiting the nuclear factor- $\kappa$ B and erythropoietin-producing hepatocellular receptor A2 signaling pathways. *Oncol Lett*. 2021 Jun;21(6):452. doi: 10.3892/ol.2021.12713. Epub 2021 Apr 8. PMID: 33907562; PMCID: PMC8063271.
- Won HJ, Kim HI, Park T, Kim H, Jo K, Jeon H, Ha SJ, Hyun JM, Jeong A, Kim JS, Park YJ, Eo YH, Lee J. Non-clinical pharmacokinetic behavior of ginsenosides. *J Ginseng Res*. 2019 Jul;43(3):354-360. doi: 10.1016/j.jgr.2018.06.001. Epub 2018 Jun 18. PMID: 31308806; PMCID: PMC6606970.
- Xu D, Wang C, Zhao W, Gao S, Cui Z. Antidepressant-like effects of ginsenoside Rg5 in mice: Involving of hippocampus BDNF signaling pathway. *Neurosci Lett*. 2017 Apr 3;645:97-105. doi: 10.1016/j.neulet.2017.02.071. Epub 2017 Mar 1. PMID: 28257788.
- Xu QF, Fang XL, Chen DF. Pharmacokinetics and bioavailability of ginsenoside Rb1 and Rg1 from *Panax notoginseng* in rats. *J Ethnopharmacol*. 2003 Feb;84(2-3):187-92. doi: 10.1016/s0378-8741(02)00317-3. PMID: 12648814.
- Yoo S, Park BI, Kim DH, Lee S, Lee SH, Shim WS, Seo YK, Kang K, Lee KT, Yim SV, Soung DY, Kim BH. Ginsenoside Absorption Rate and Extent Enhancement of Black Ginseng (CJ EnerG) over Red Ginseng in Healthy Adults. *Pharmaceutics*. 2021 Apr 2;13(4):487. doi: 10.3390/pharmaceutics13040487. PMID: 33918329; PMCID: PMC8067055.
- Zhou QL, Zhu DN, Yang YF, Xu W, Yang XW. Simultaneous quantification of twenty-one ginsenosides and their three aglycones in rat plasma by a developed UFLC-MS/MS assay: Application to a pharmacokinetic study of red Ginseng. *J Pharm Biomed Anal*. 2017 Apr 15;137:1-12. doi: 10.1016/j.jpba.2017.01.009. Epub 2017 Jan 6. PMID: 28086165.
- Zhu Y, Zhu C, Yang H, Deng J, Fan D. Protective effect of ginsenoside Rg5 against kidney injury via inhibition of NLRP3 inflammasome activation and the MAPK signaling pathway in high-fat diet/streptozotocin-induced diabetic mice. *Pharmacol Res*. 2020 May;155:104746. doi: 10.1016/j.phrs.2020.104746. Epub 2020 Mar 7. PMID: 32156650.
