# Supplementary figures and images for: Network Pharmacology of Red Ginseng (Part I): Effects of Ginsenoside Rg5 at Physiological and Sub-Physiological Concentrations
Source: Preprints.org preprint supplement (doi:10.20944/preprints202109.0281.v1), 2021-09-16

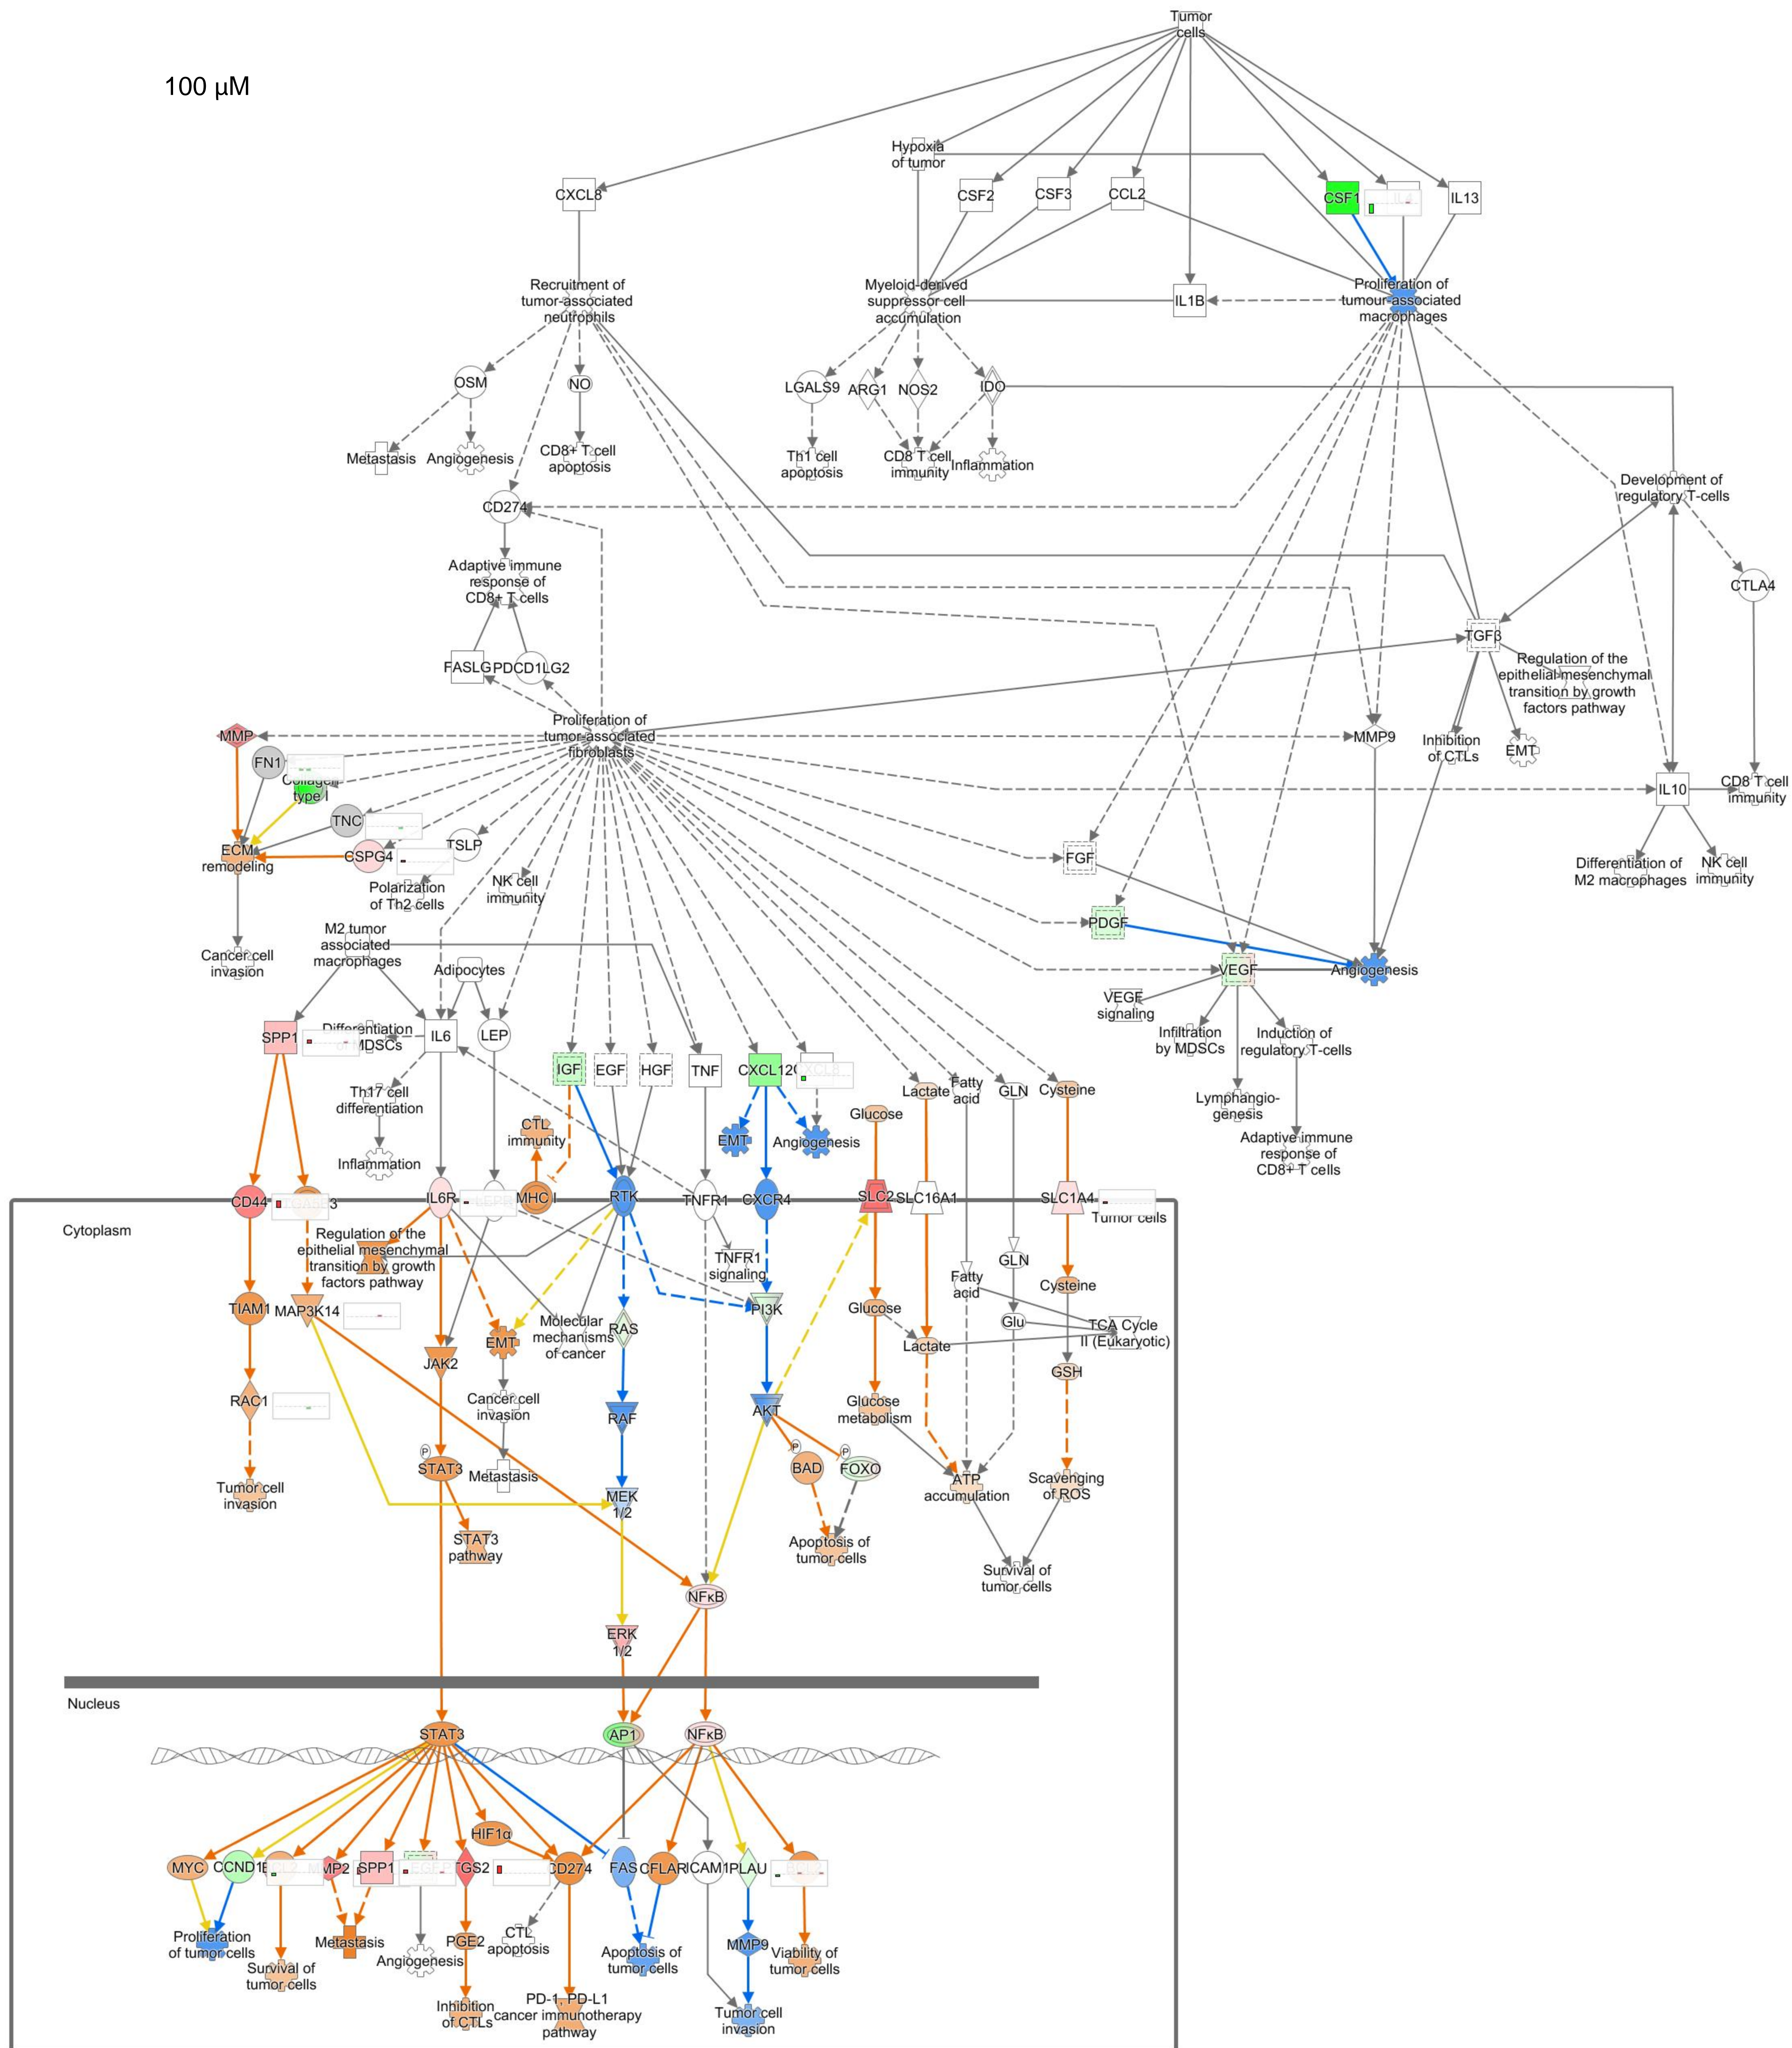



1  $\mu$ M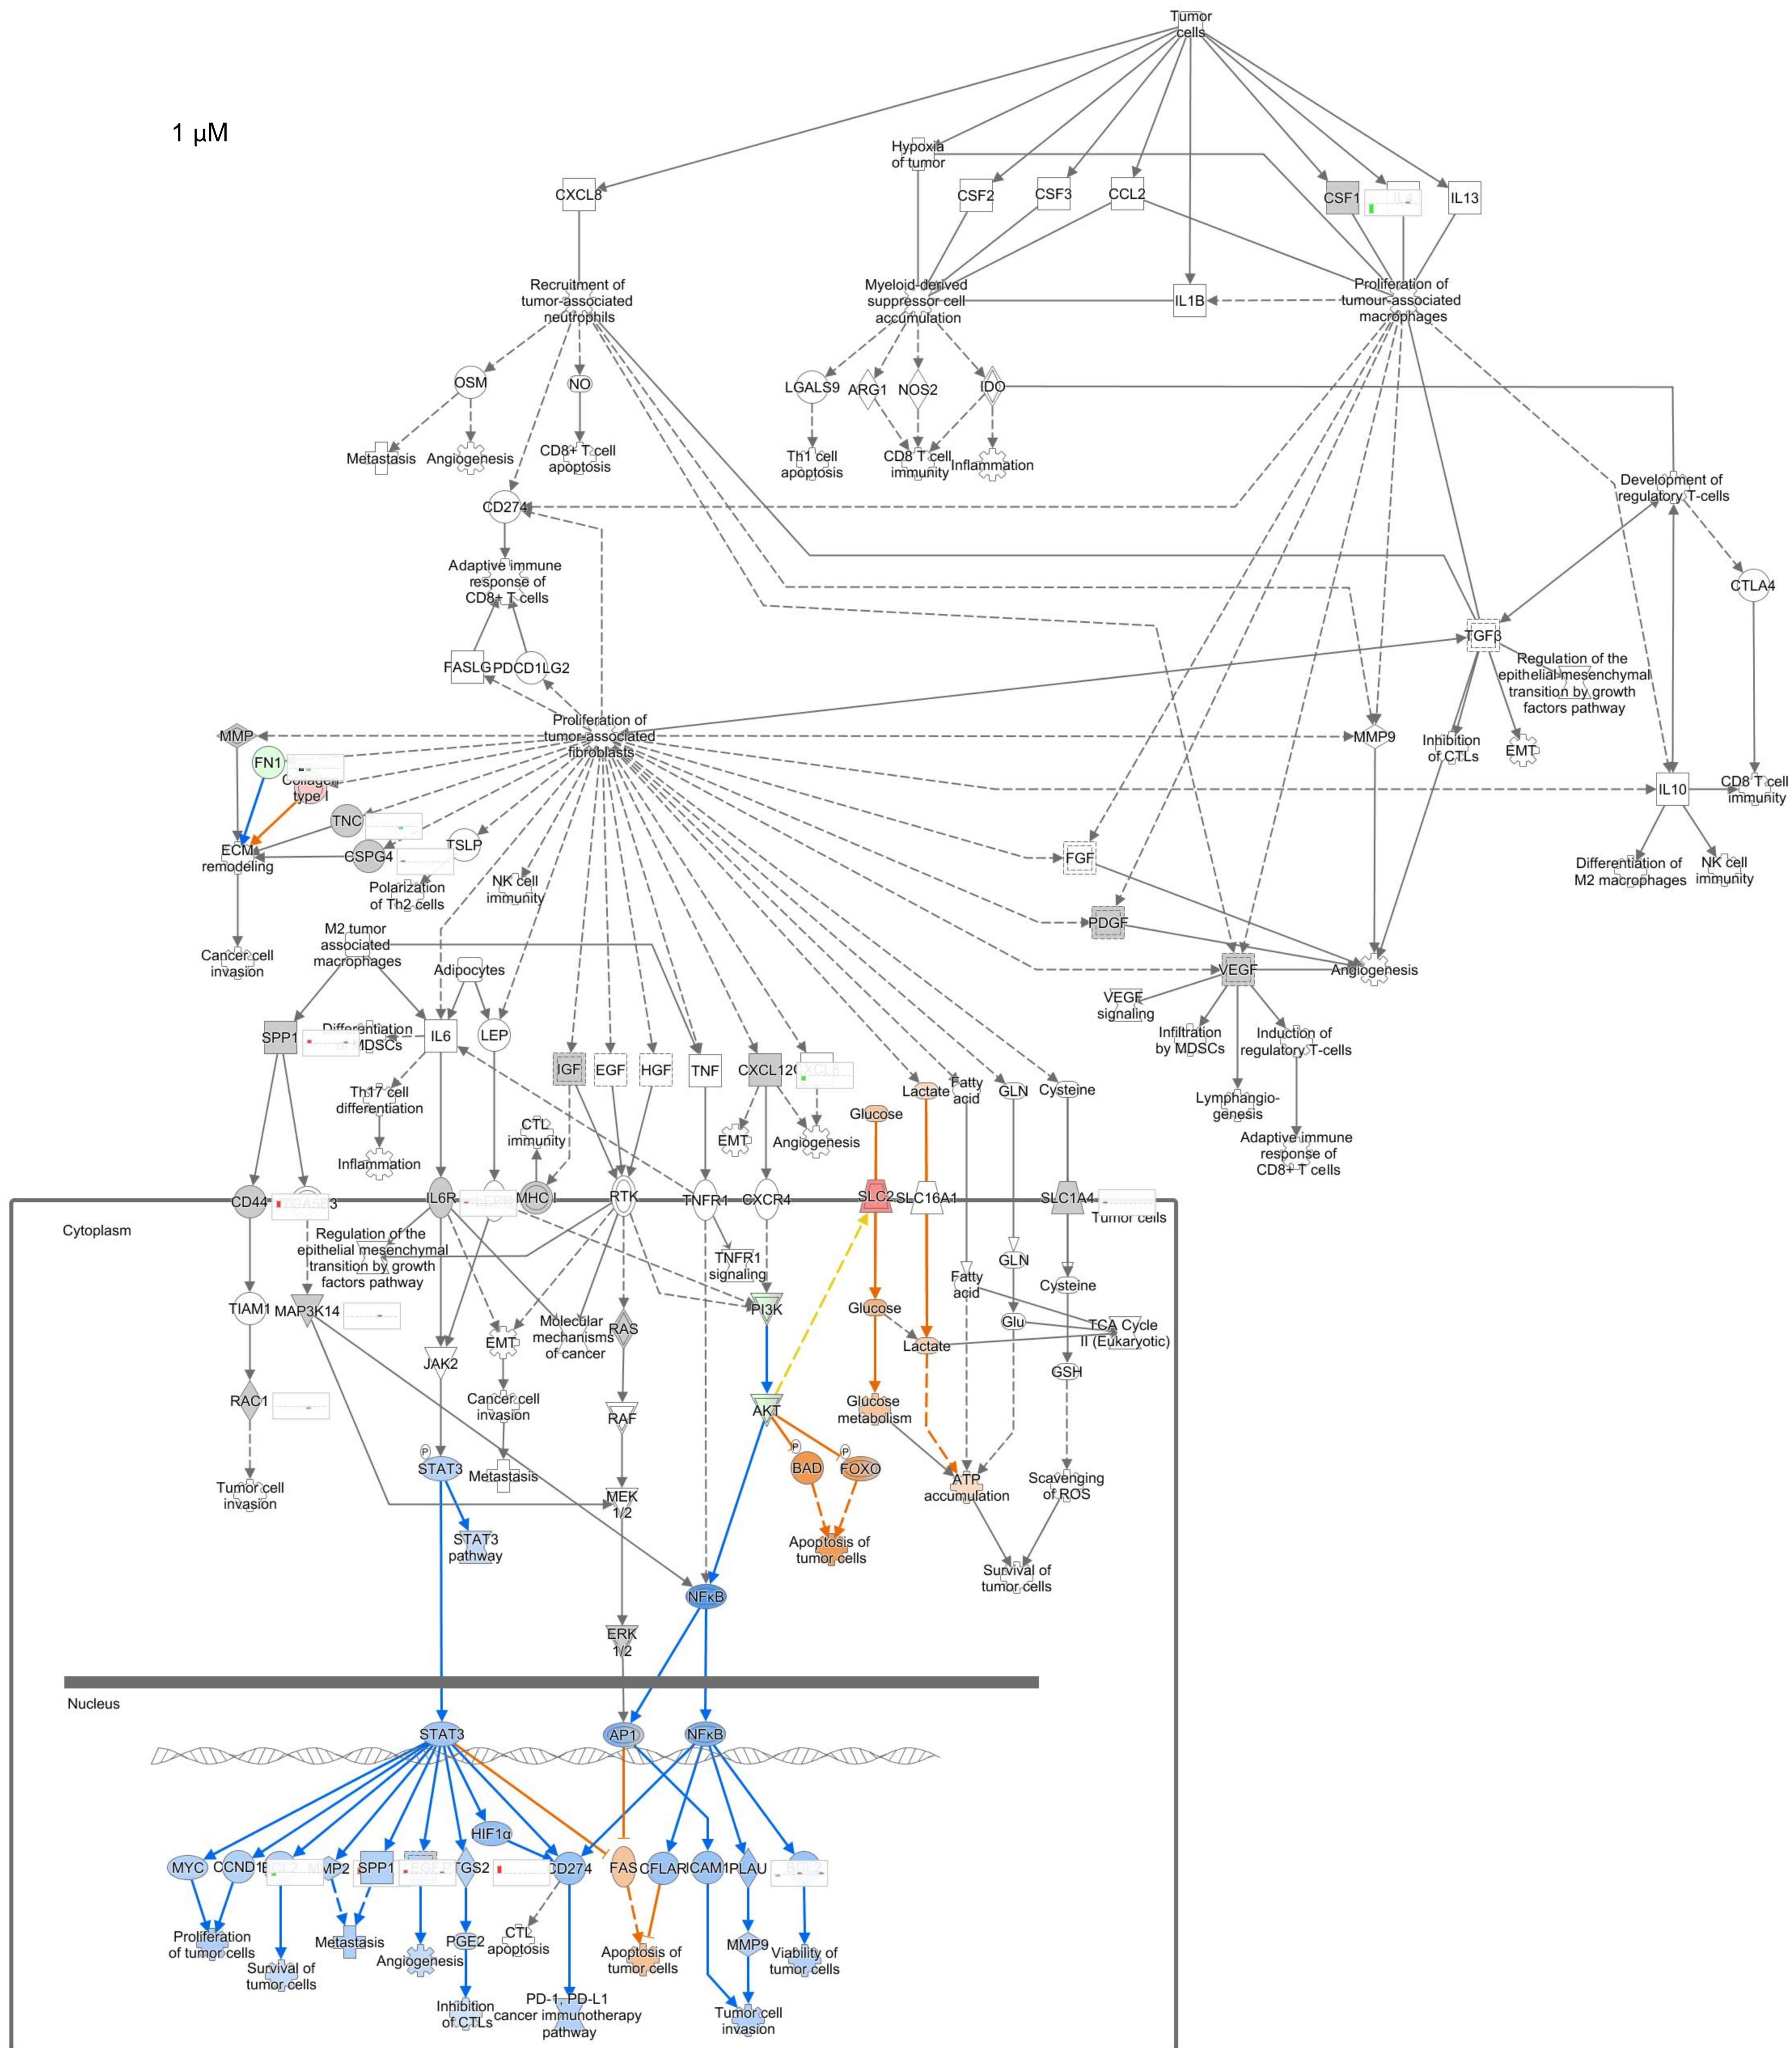



1 nM

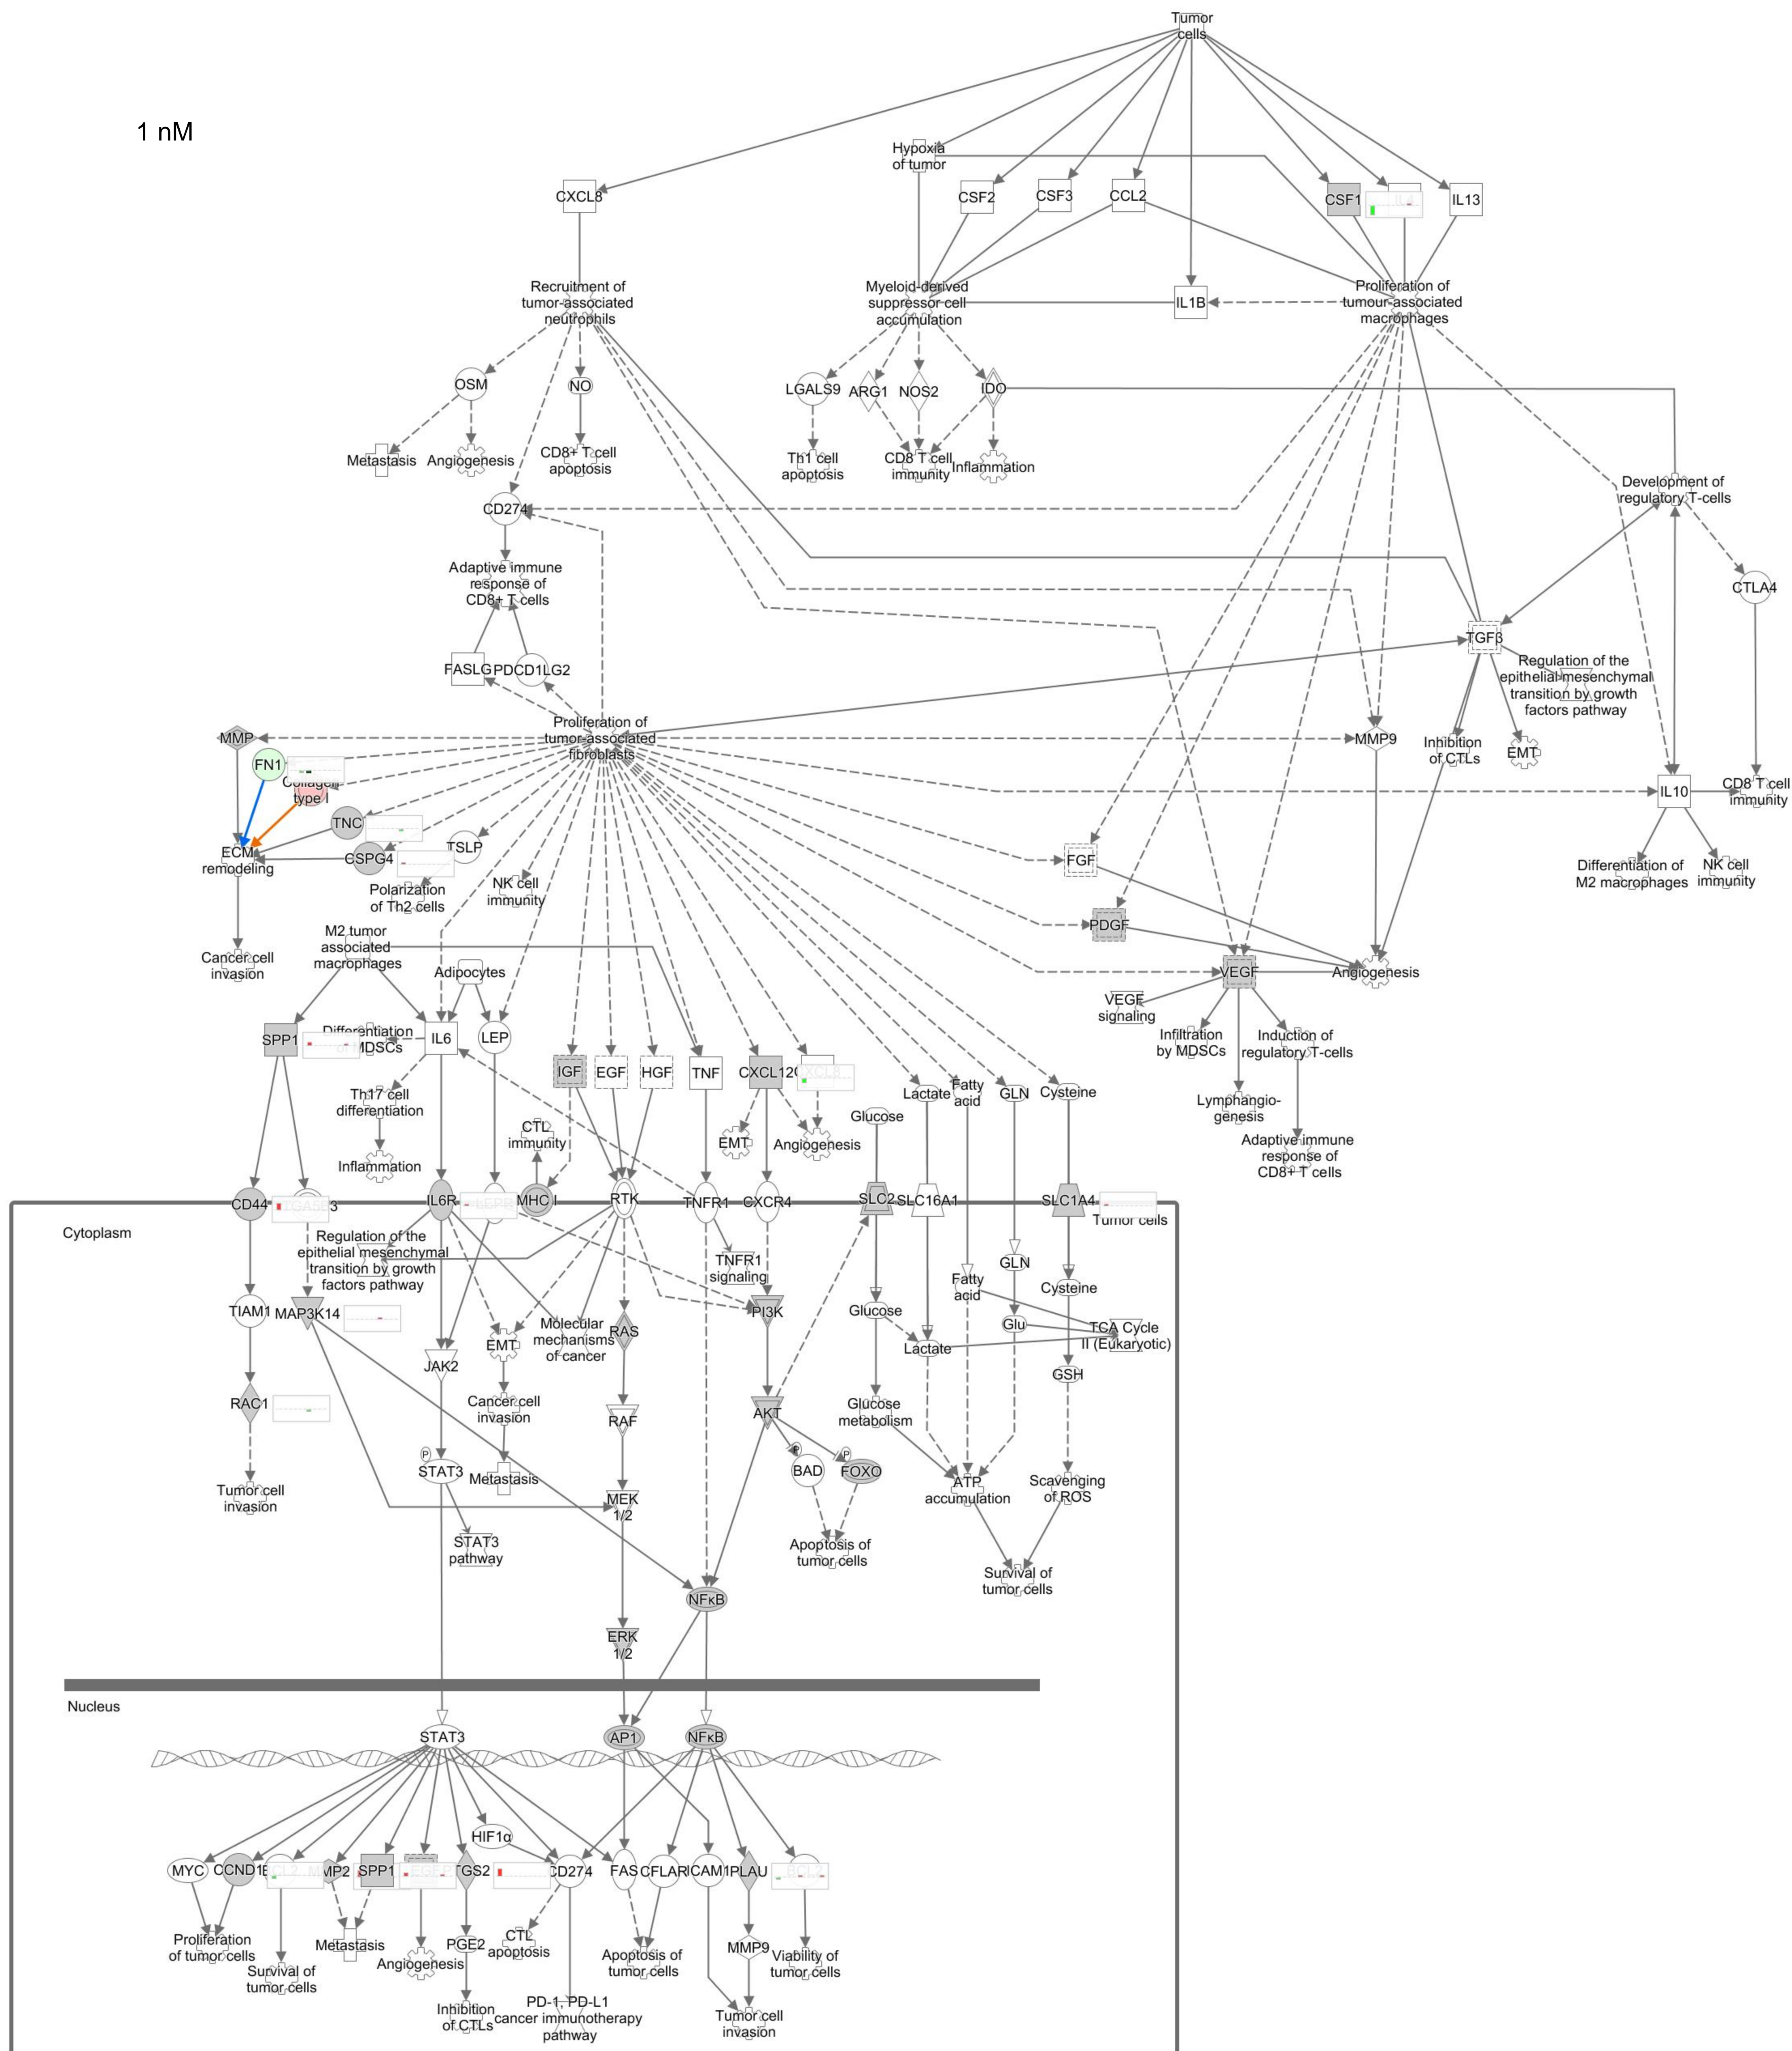



1 pM

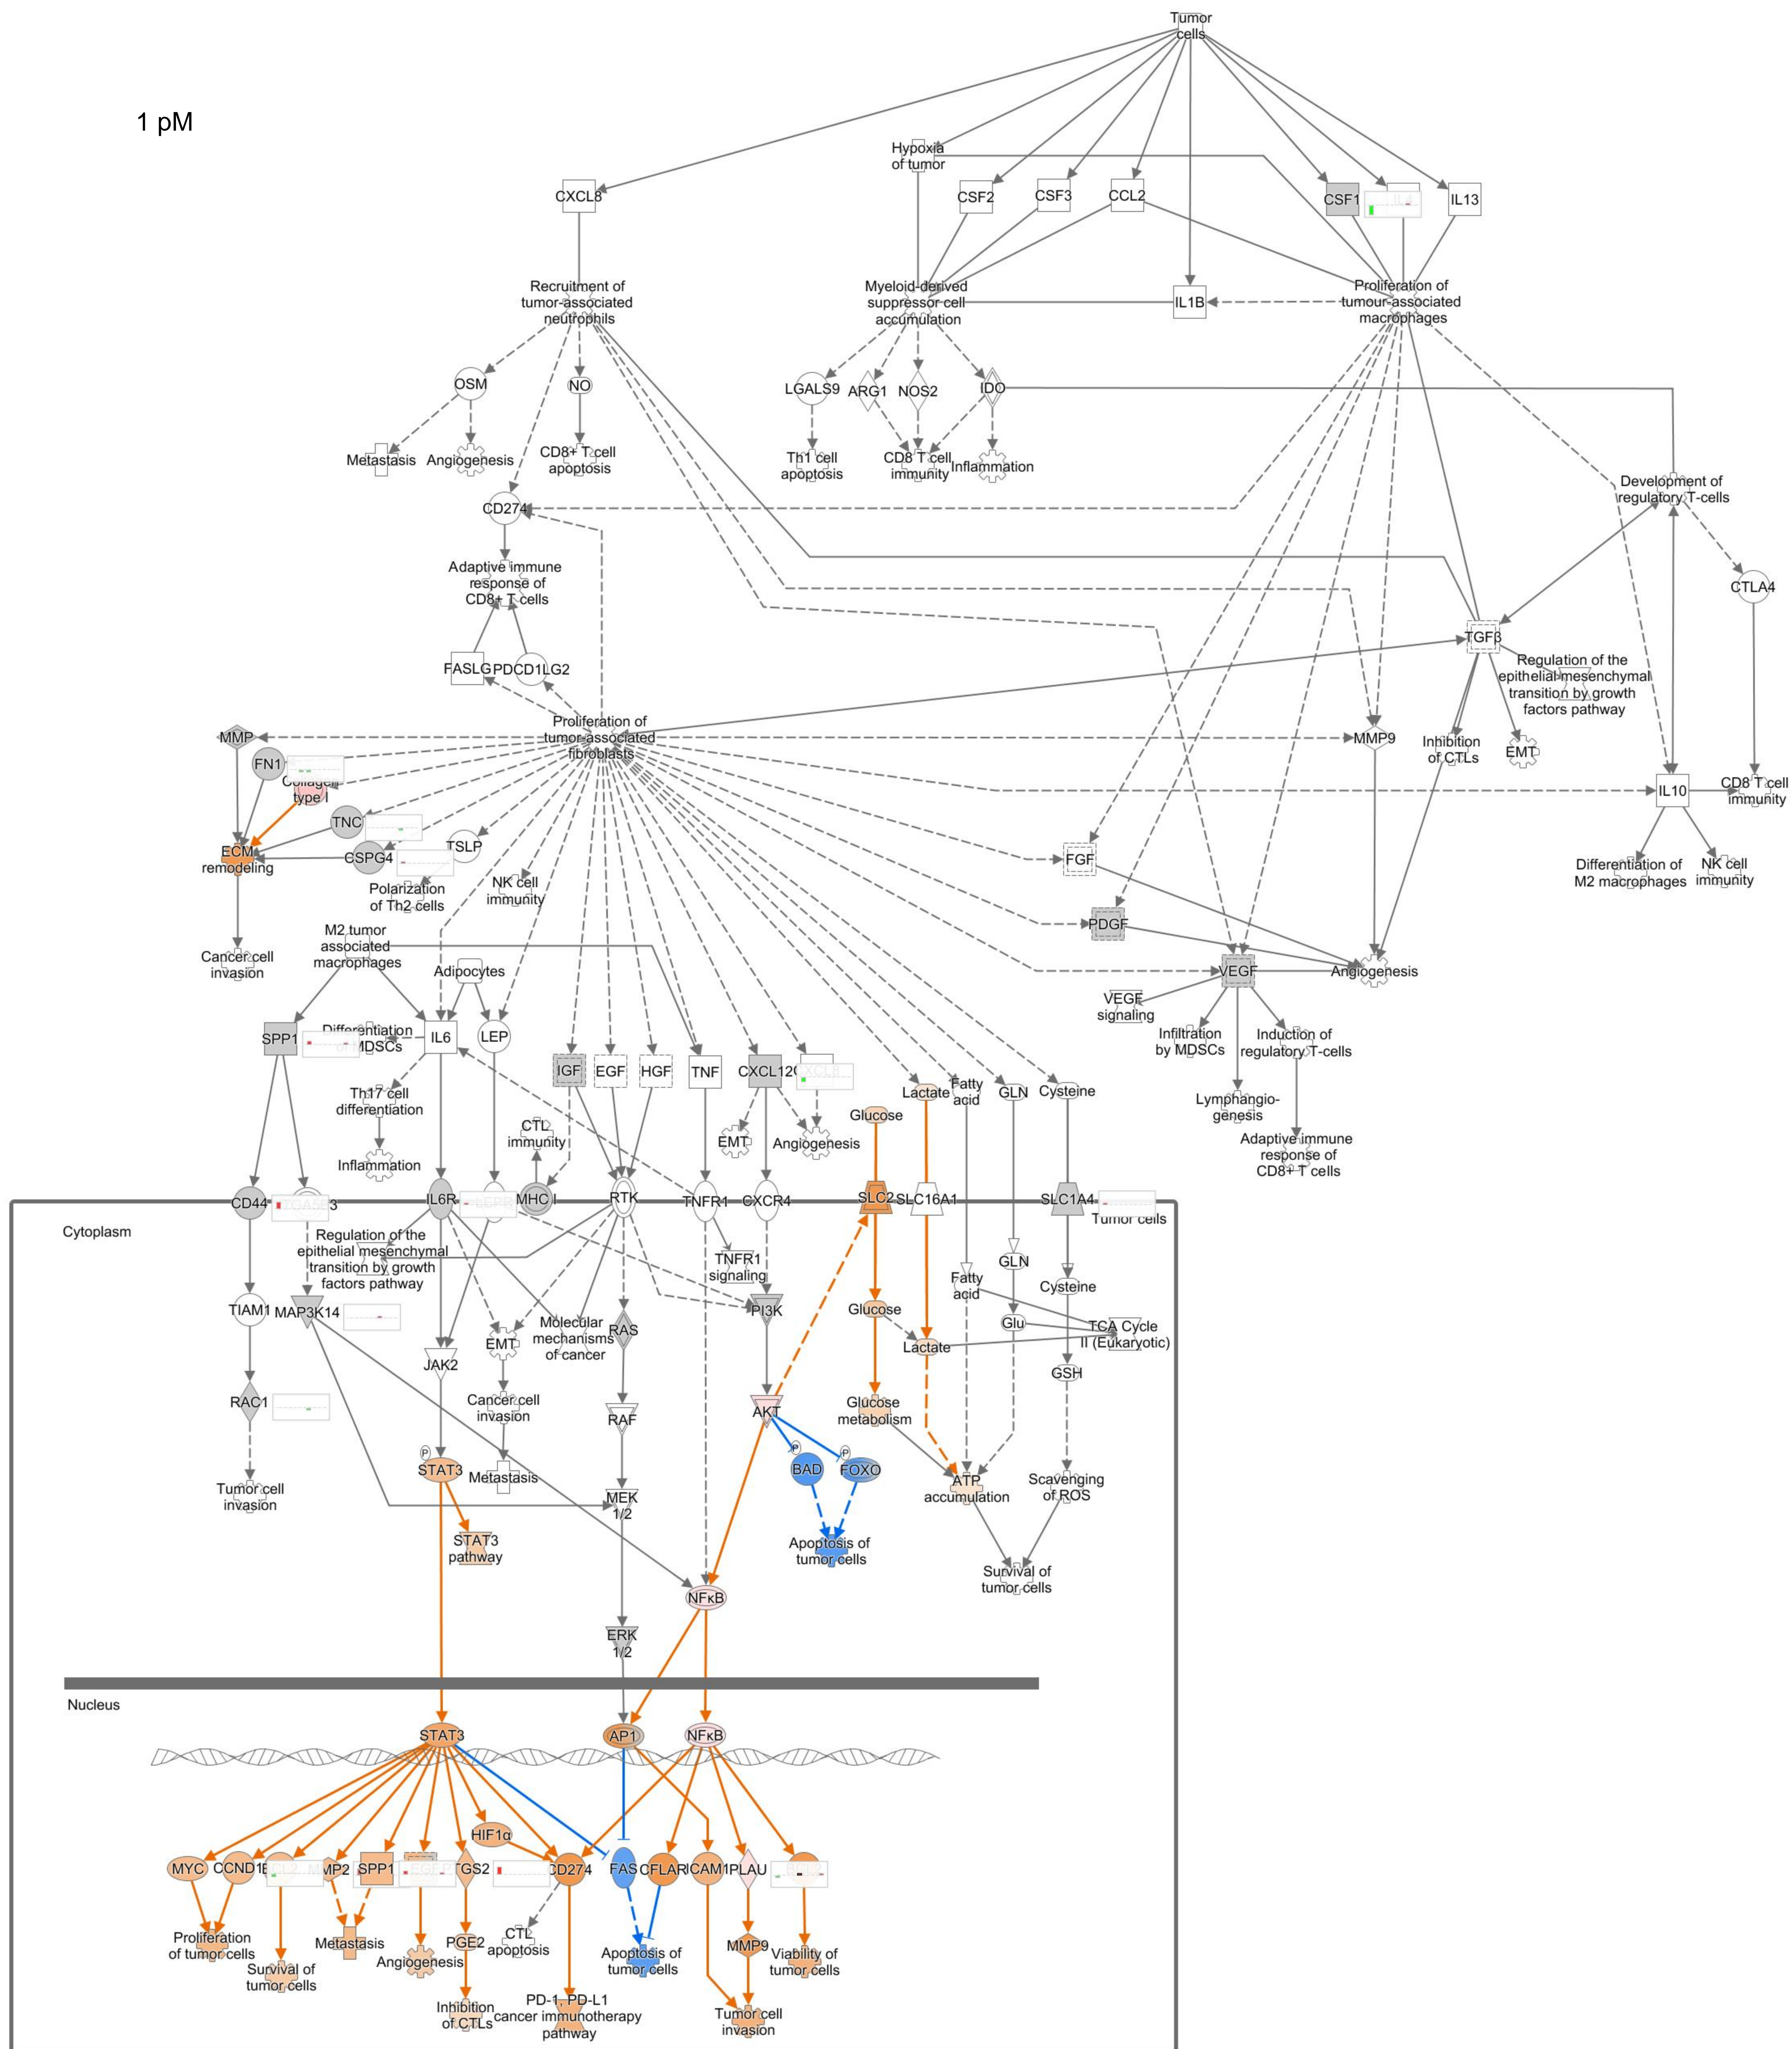



1 fM

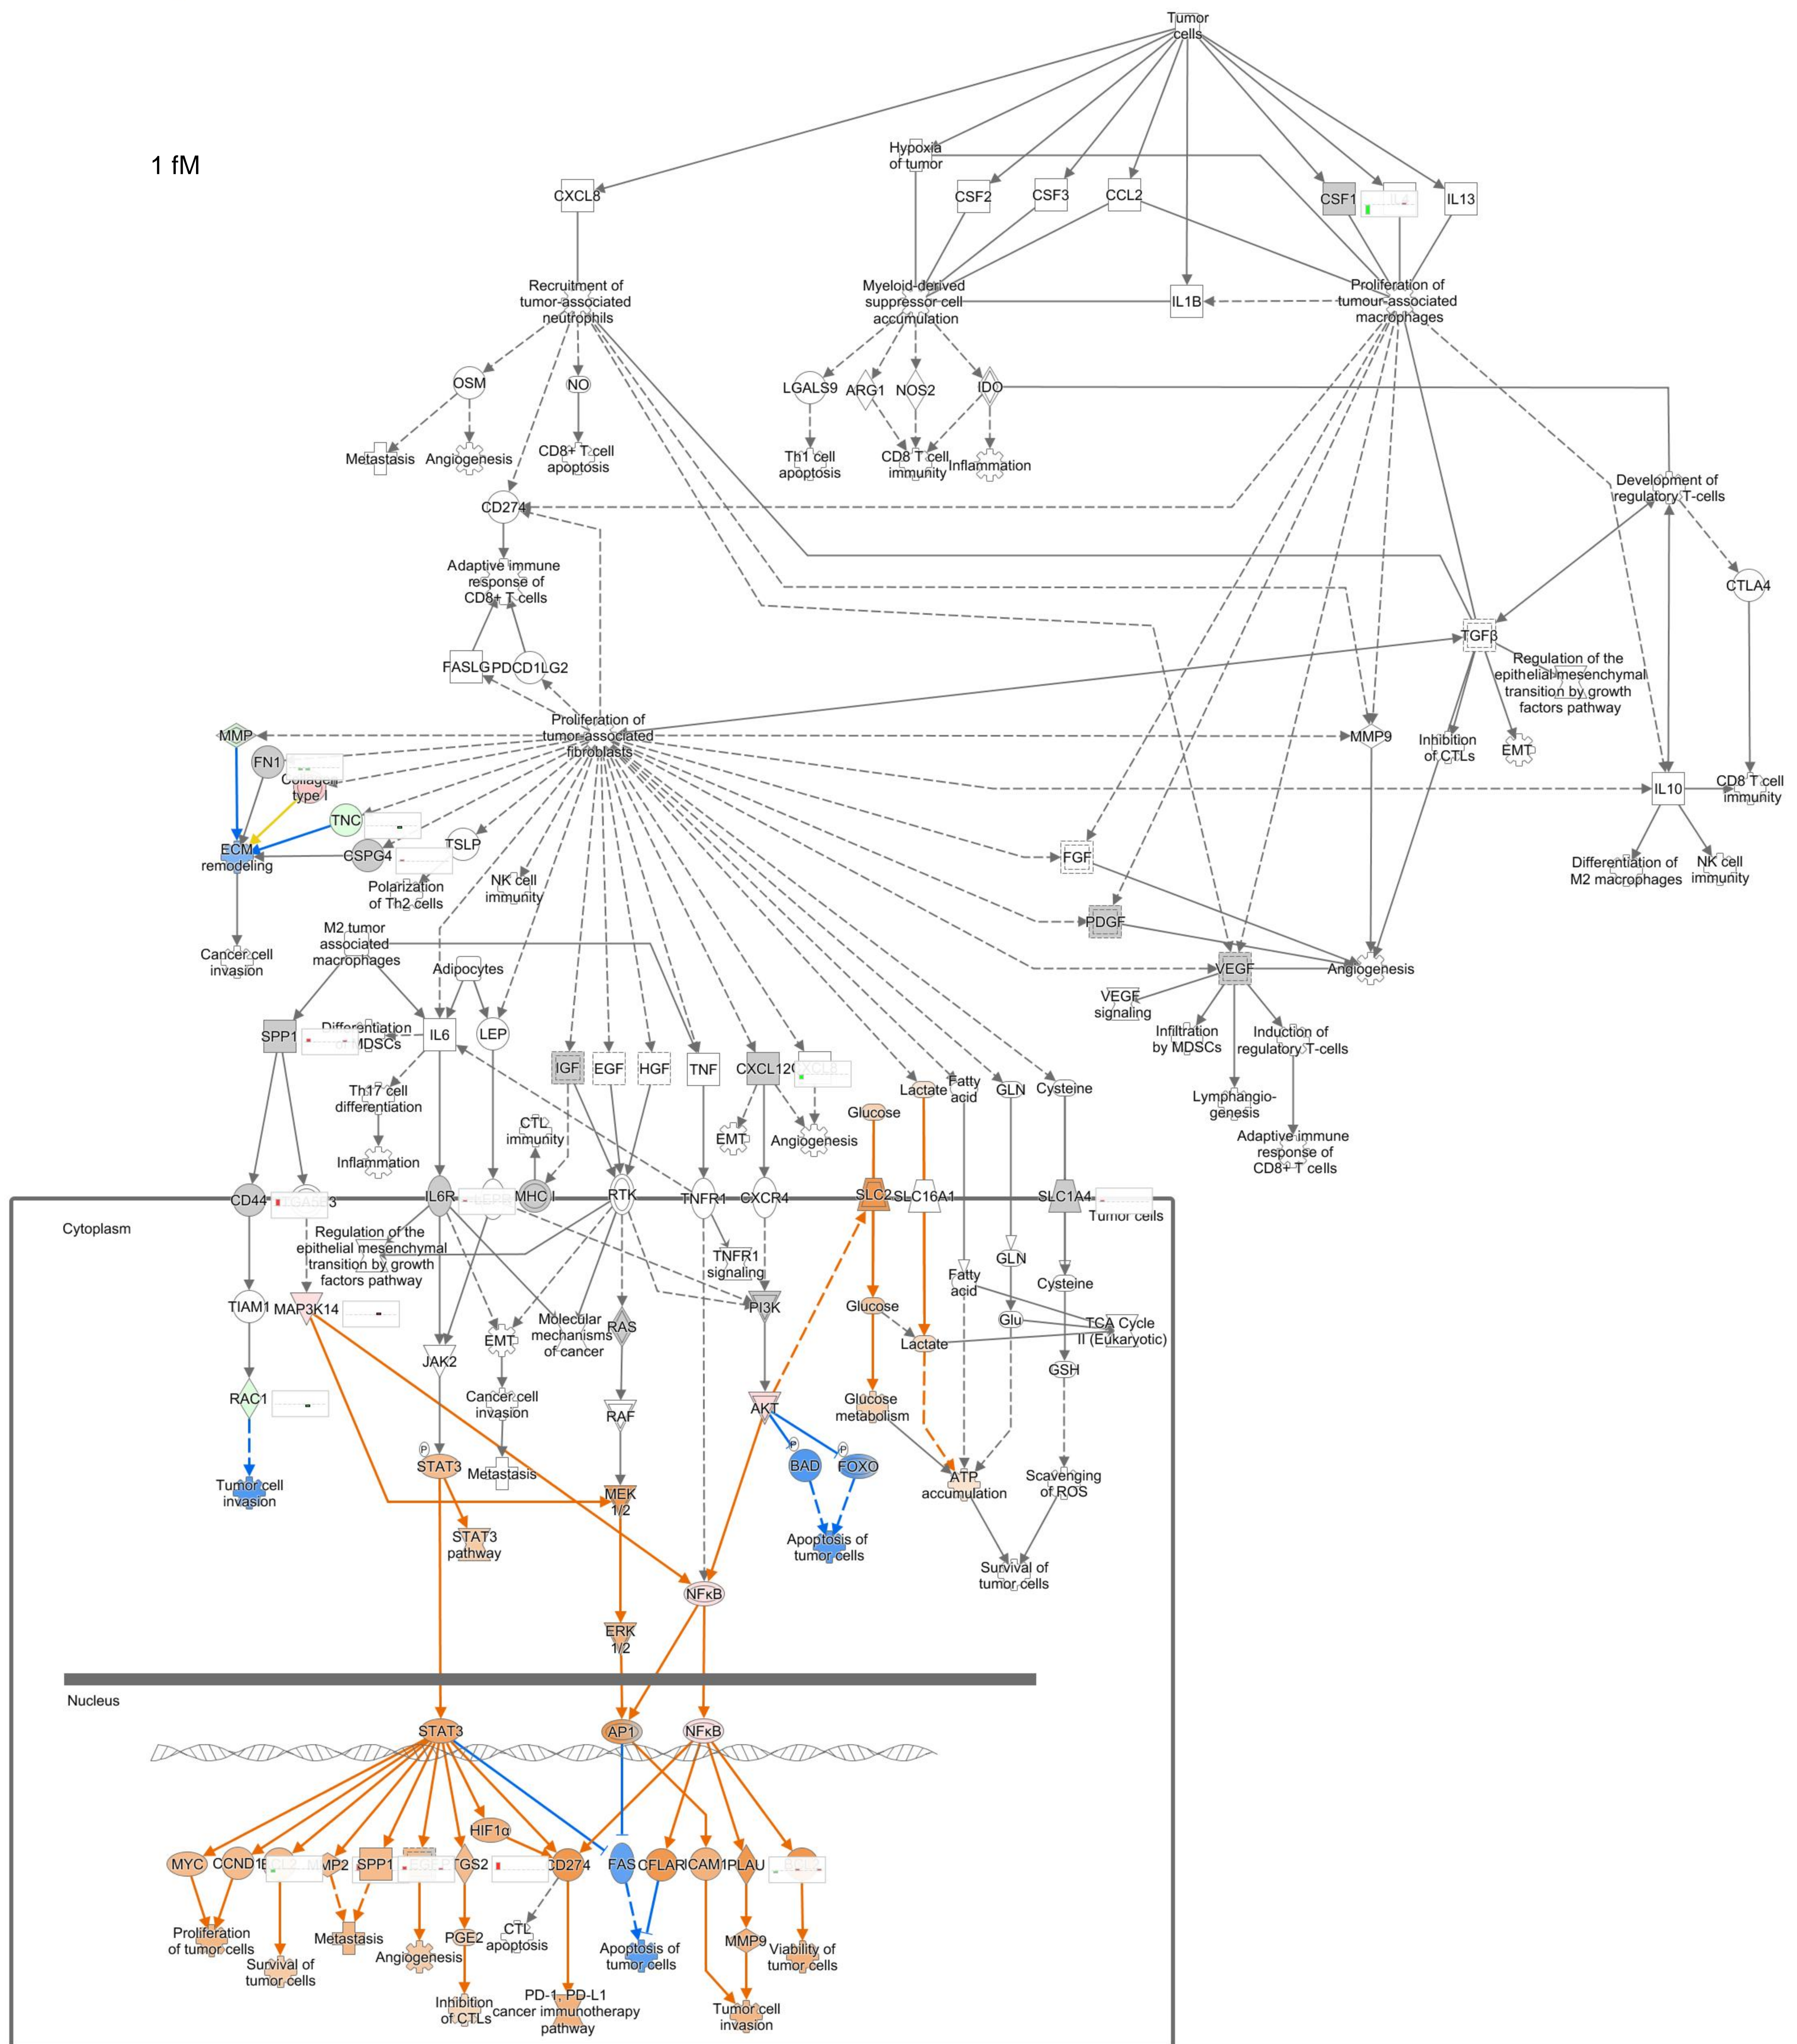



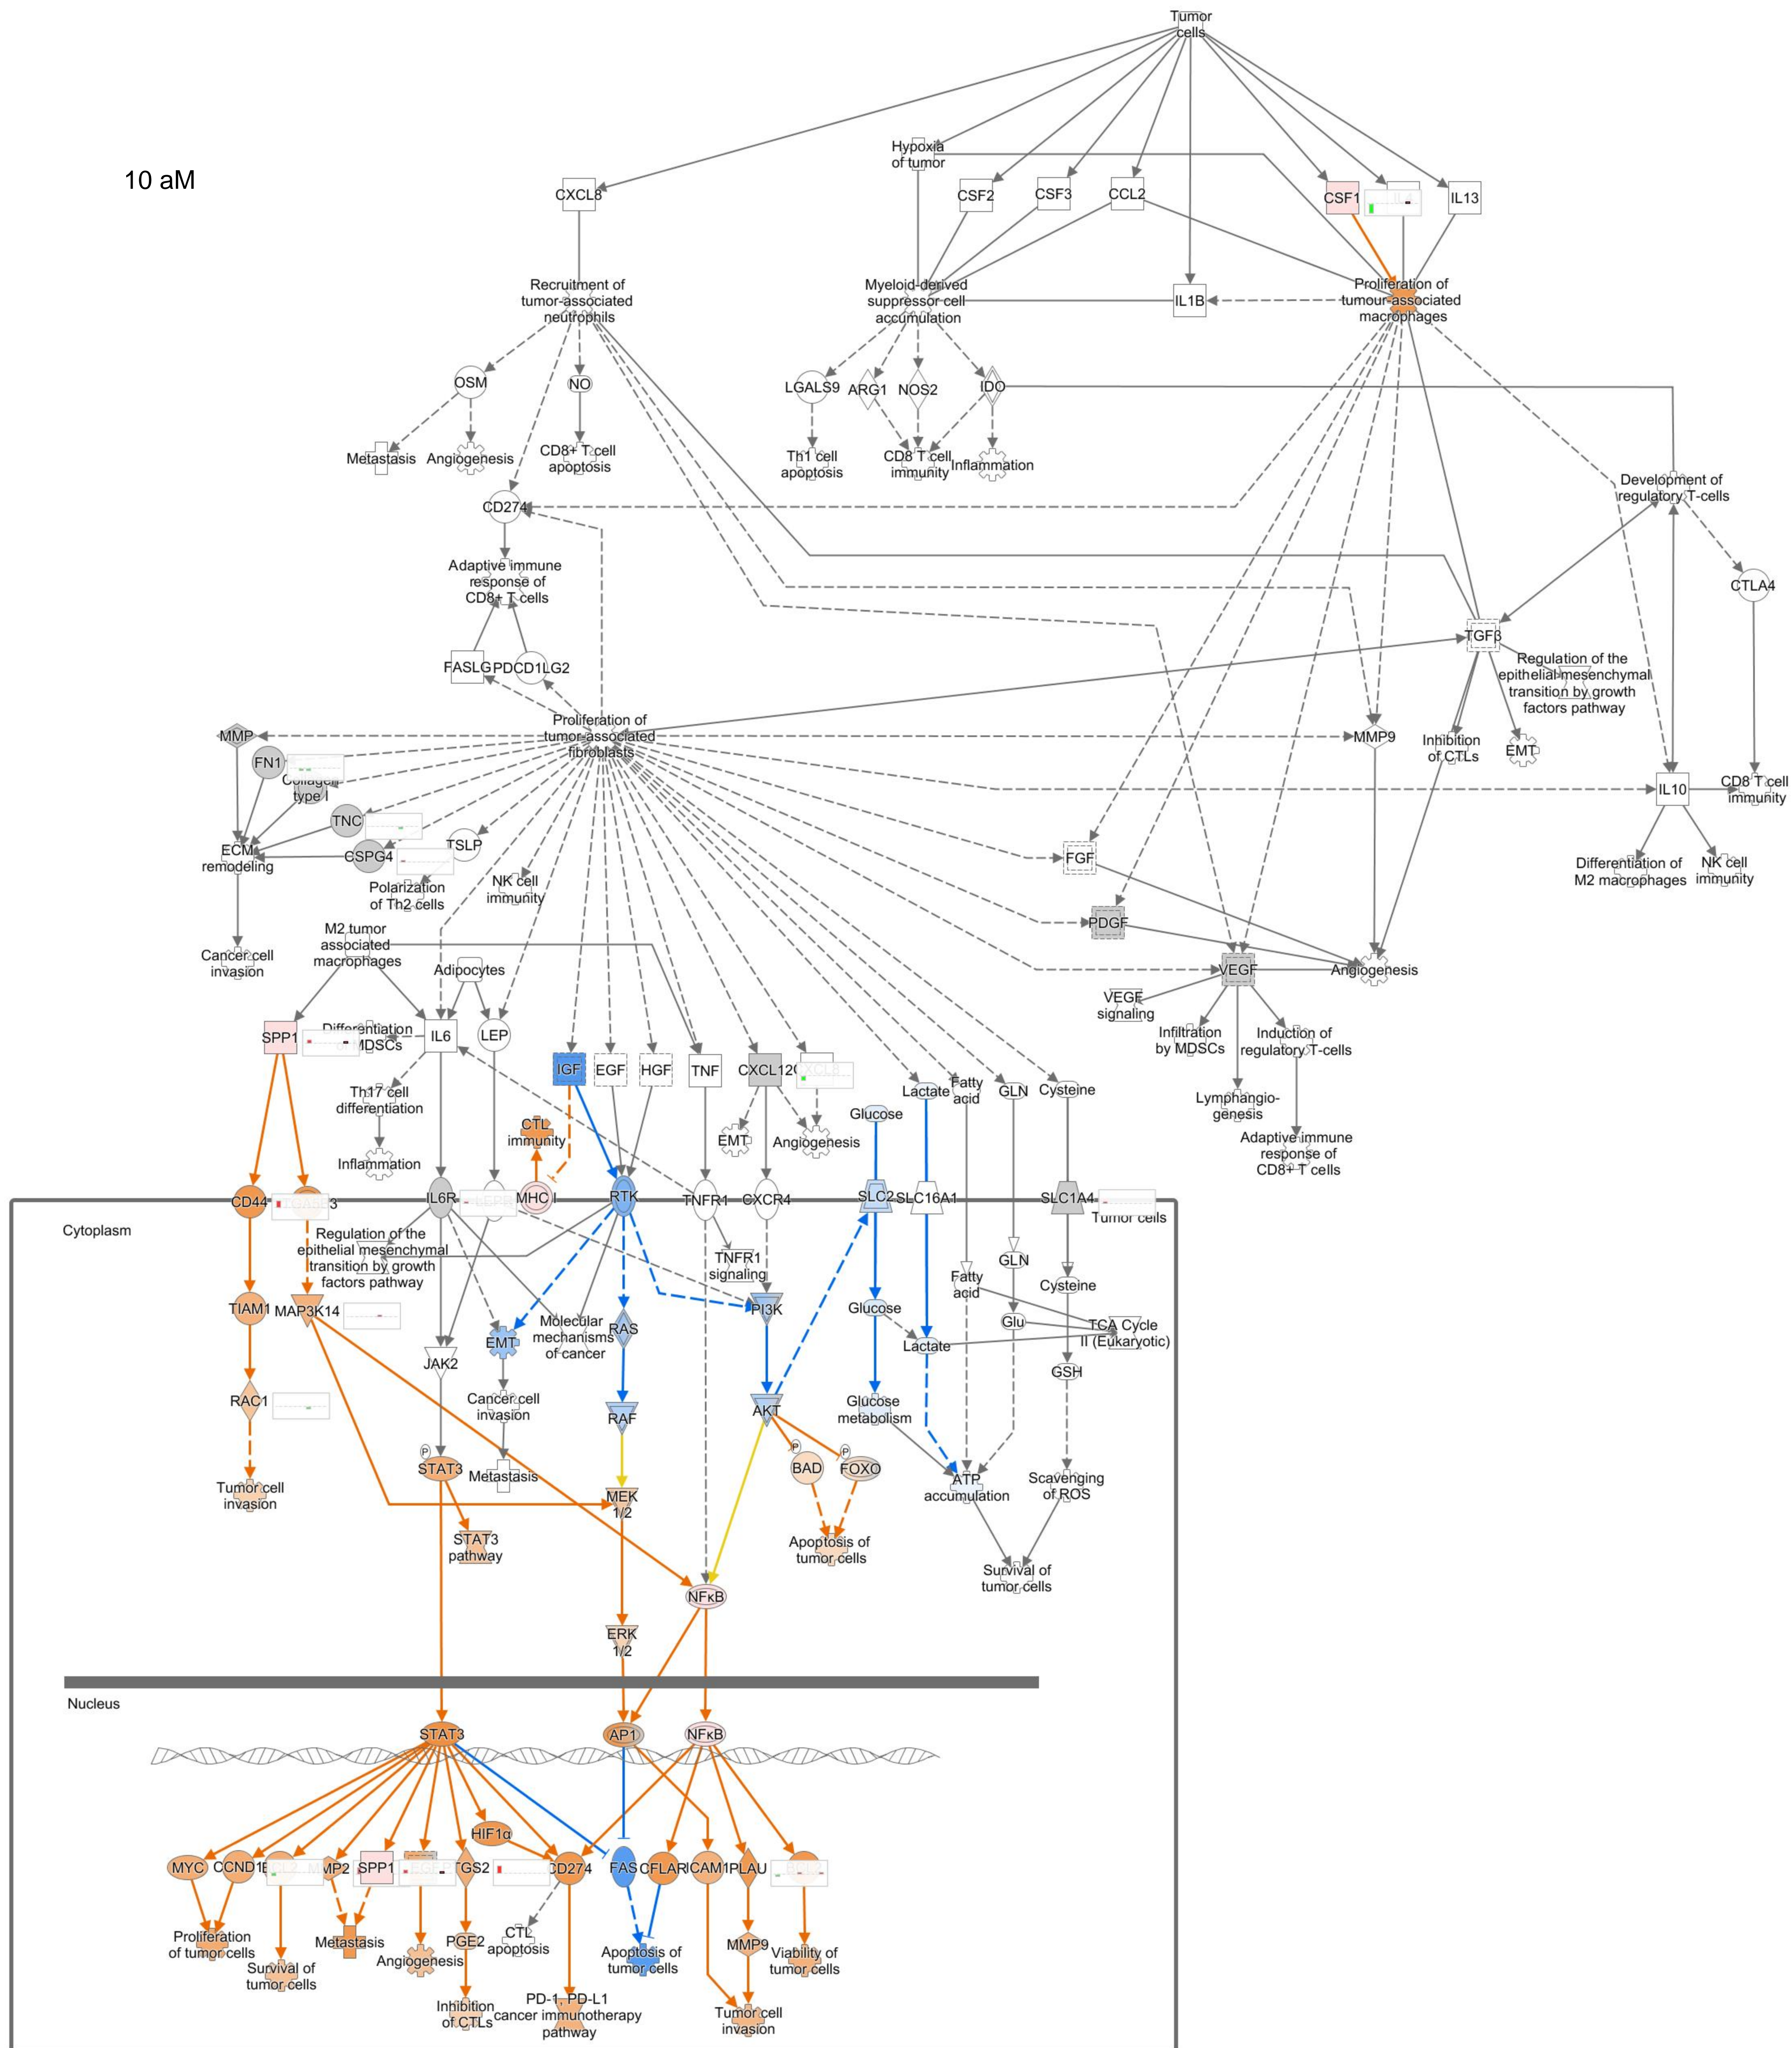



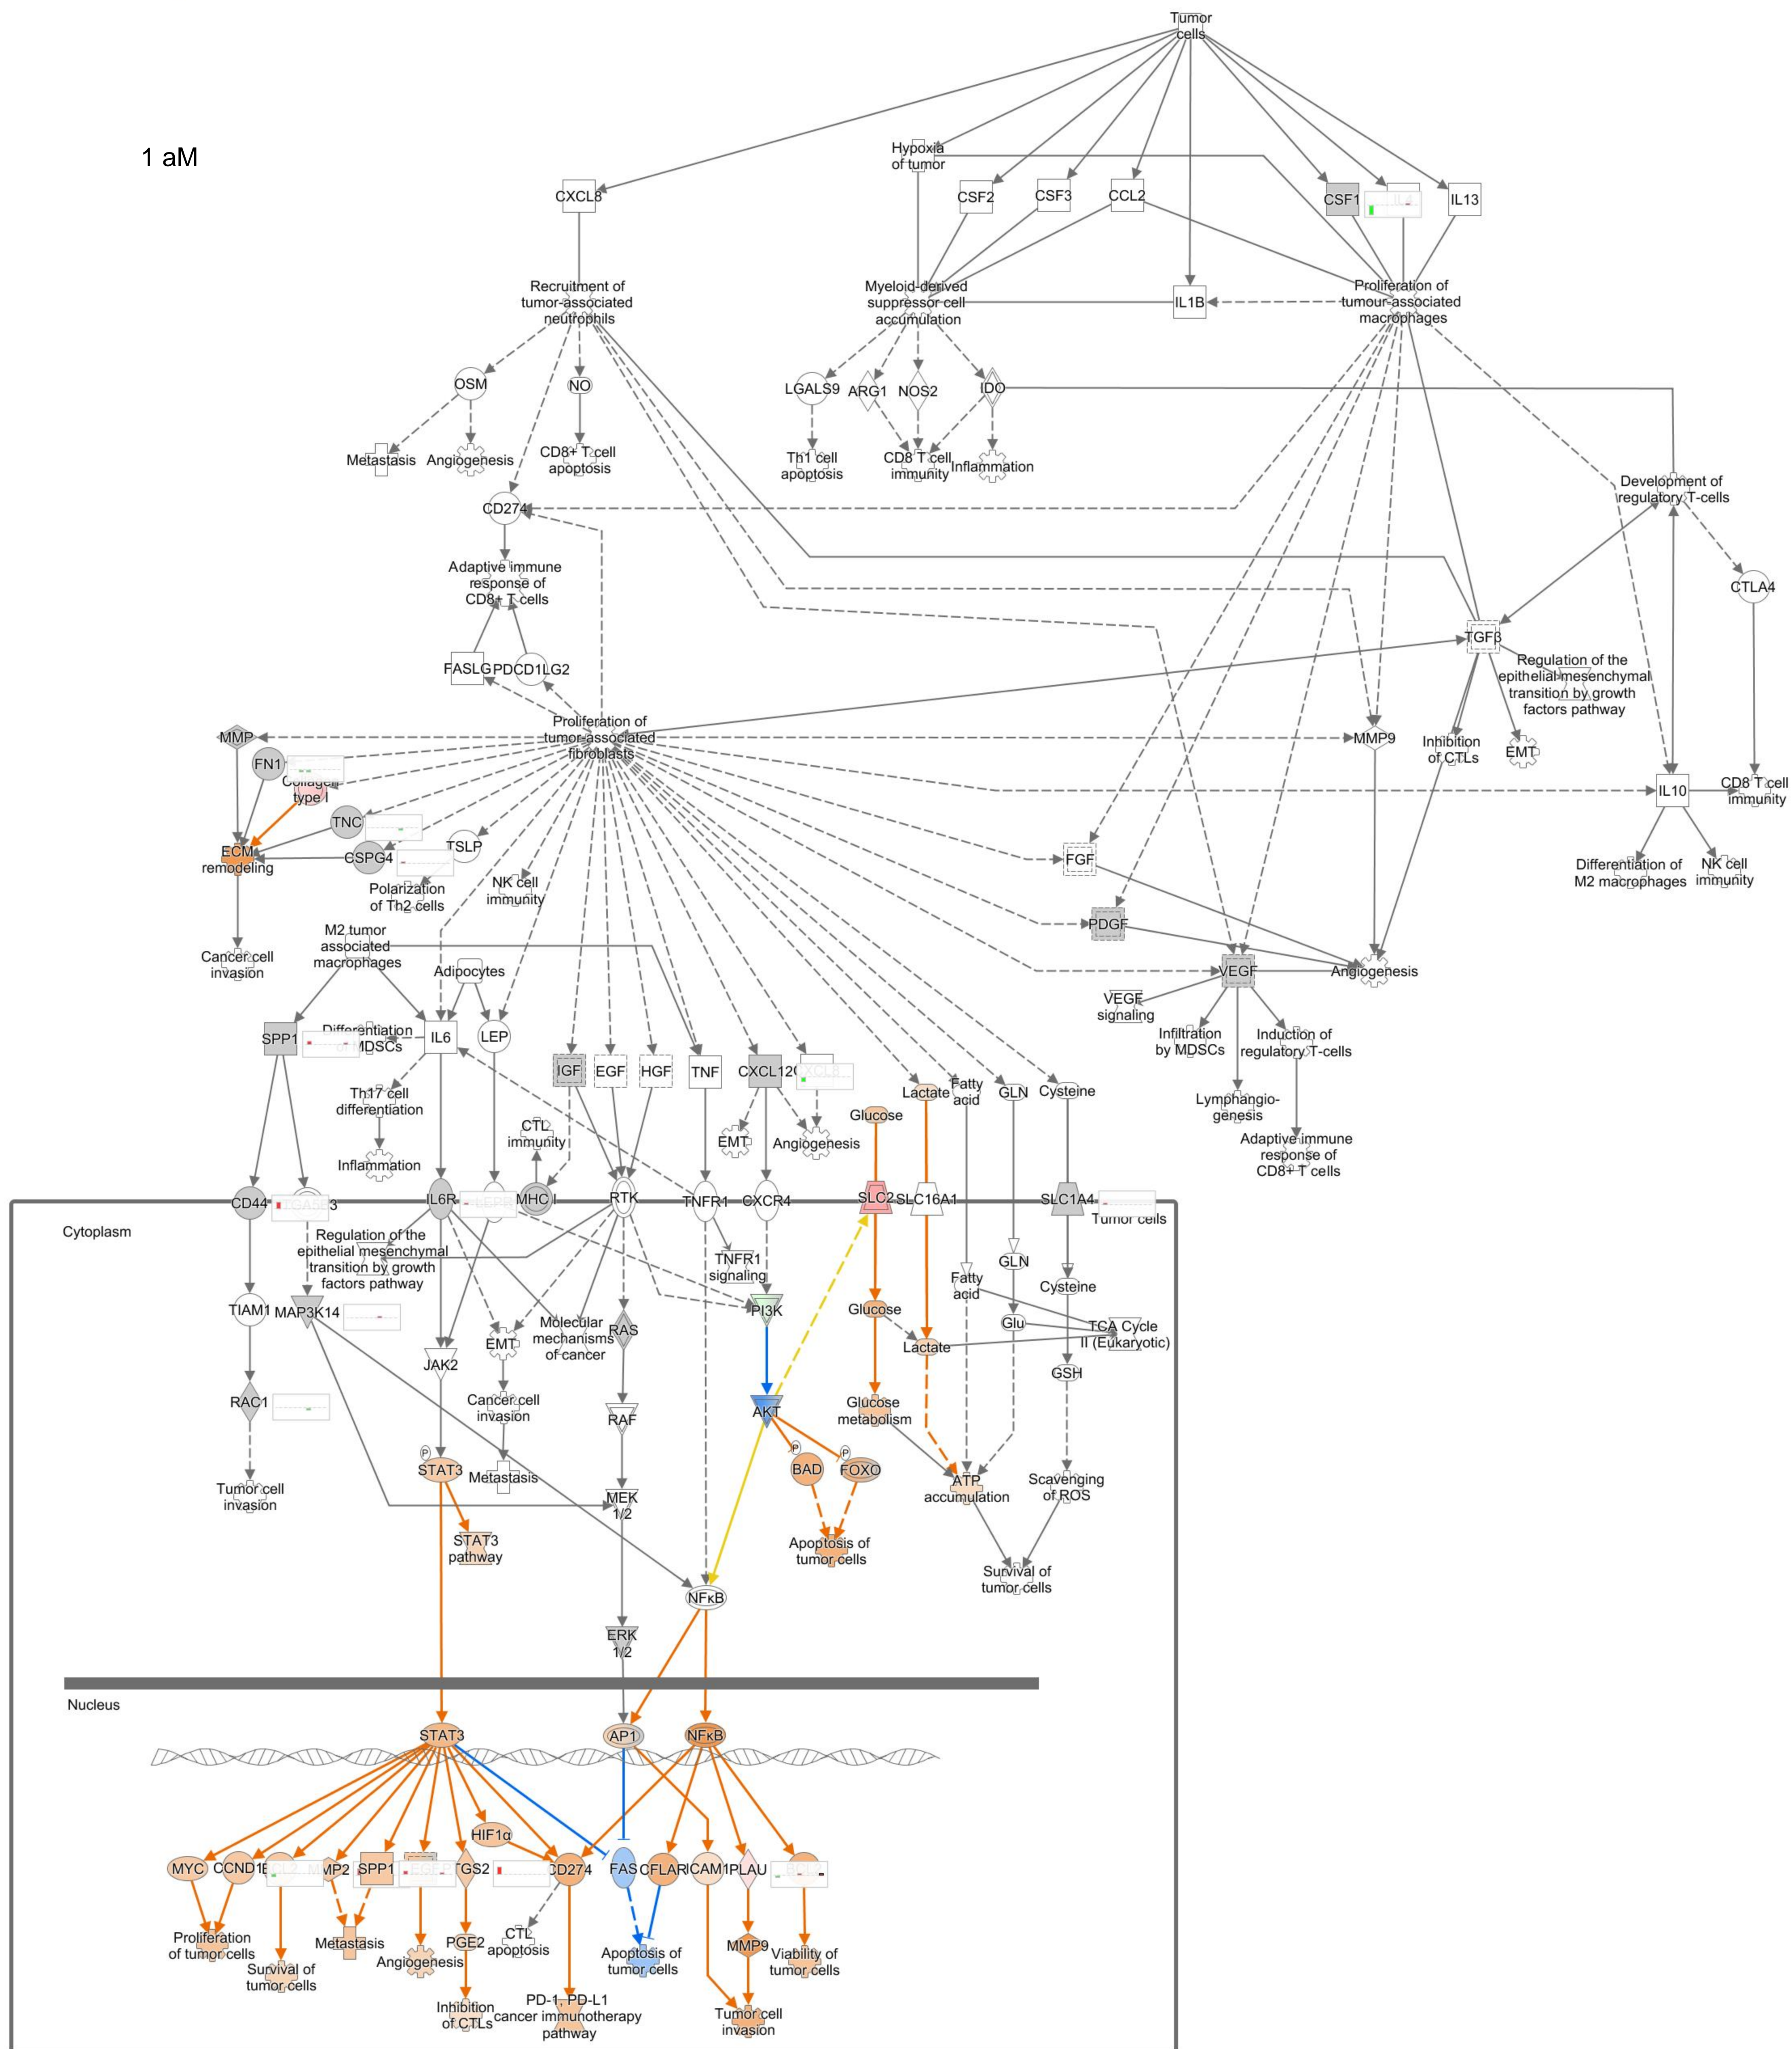

Supplement: Supplementary file 1 [file supplementary]

100  $\mu$ M

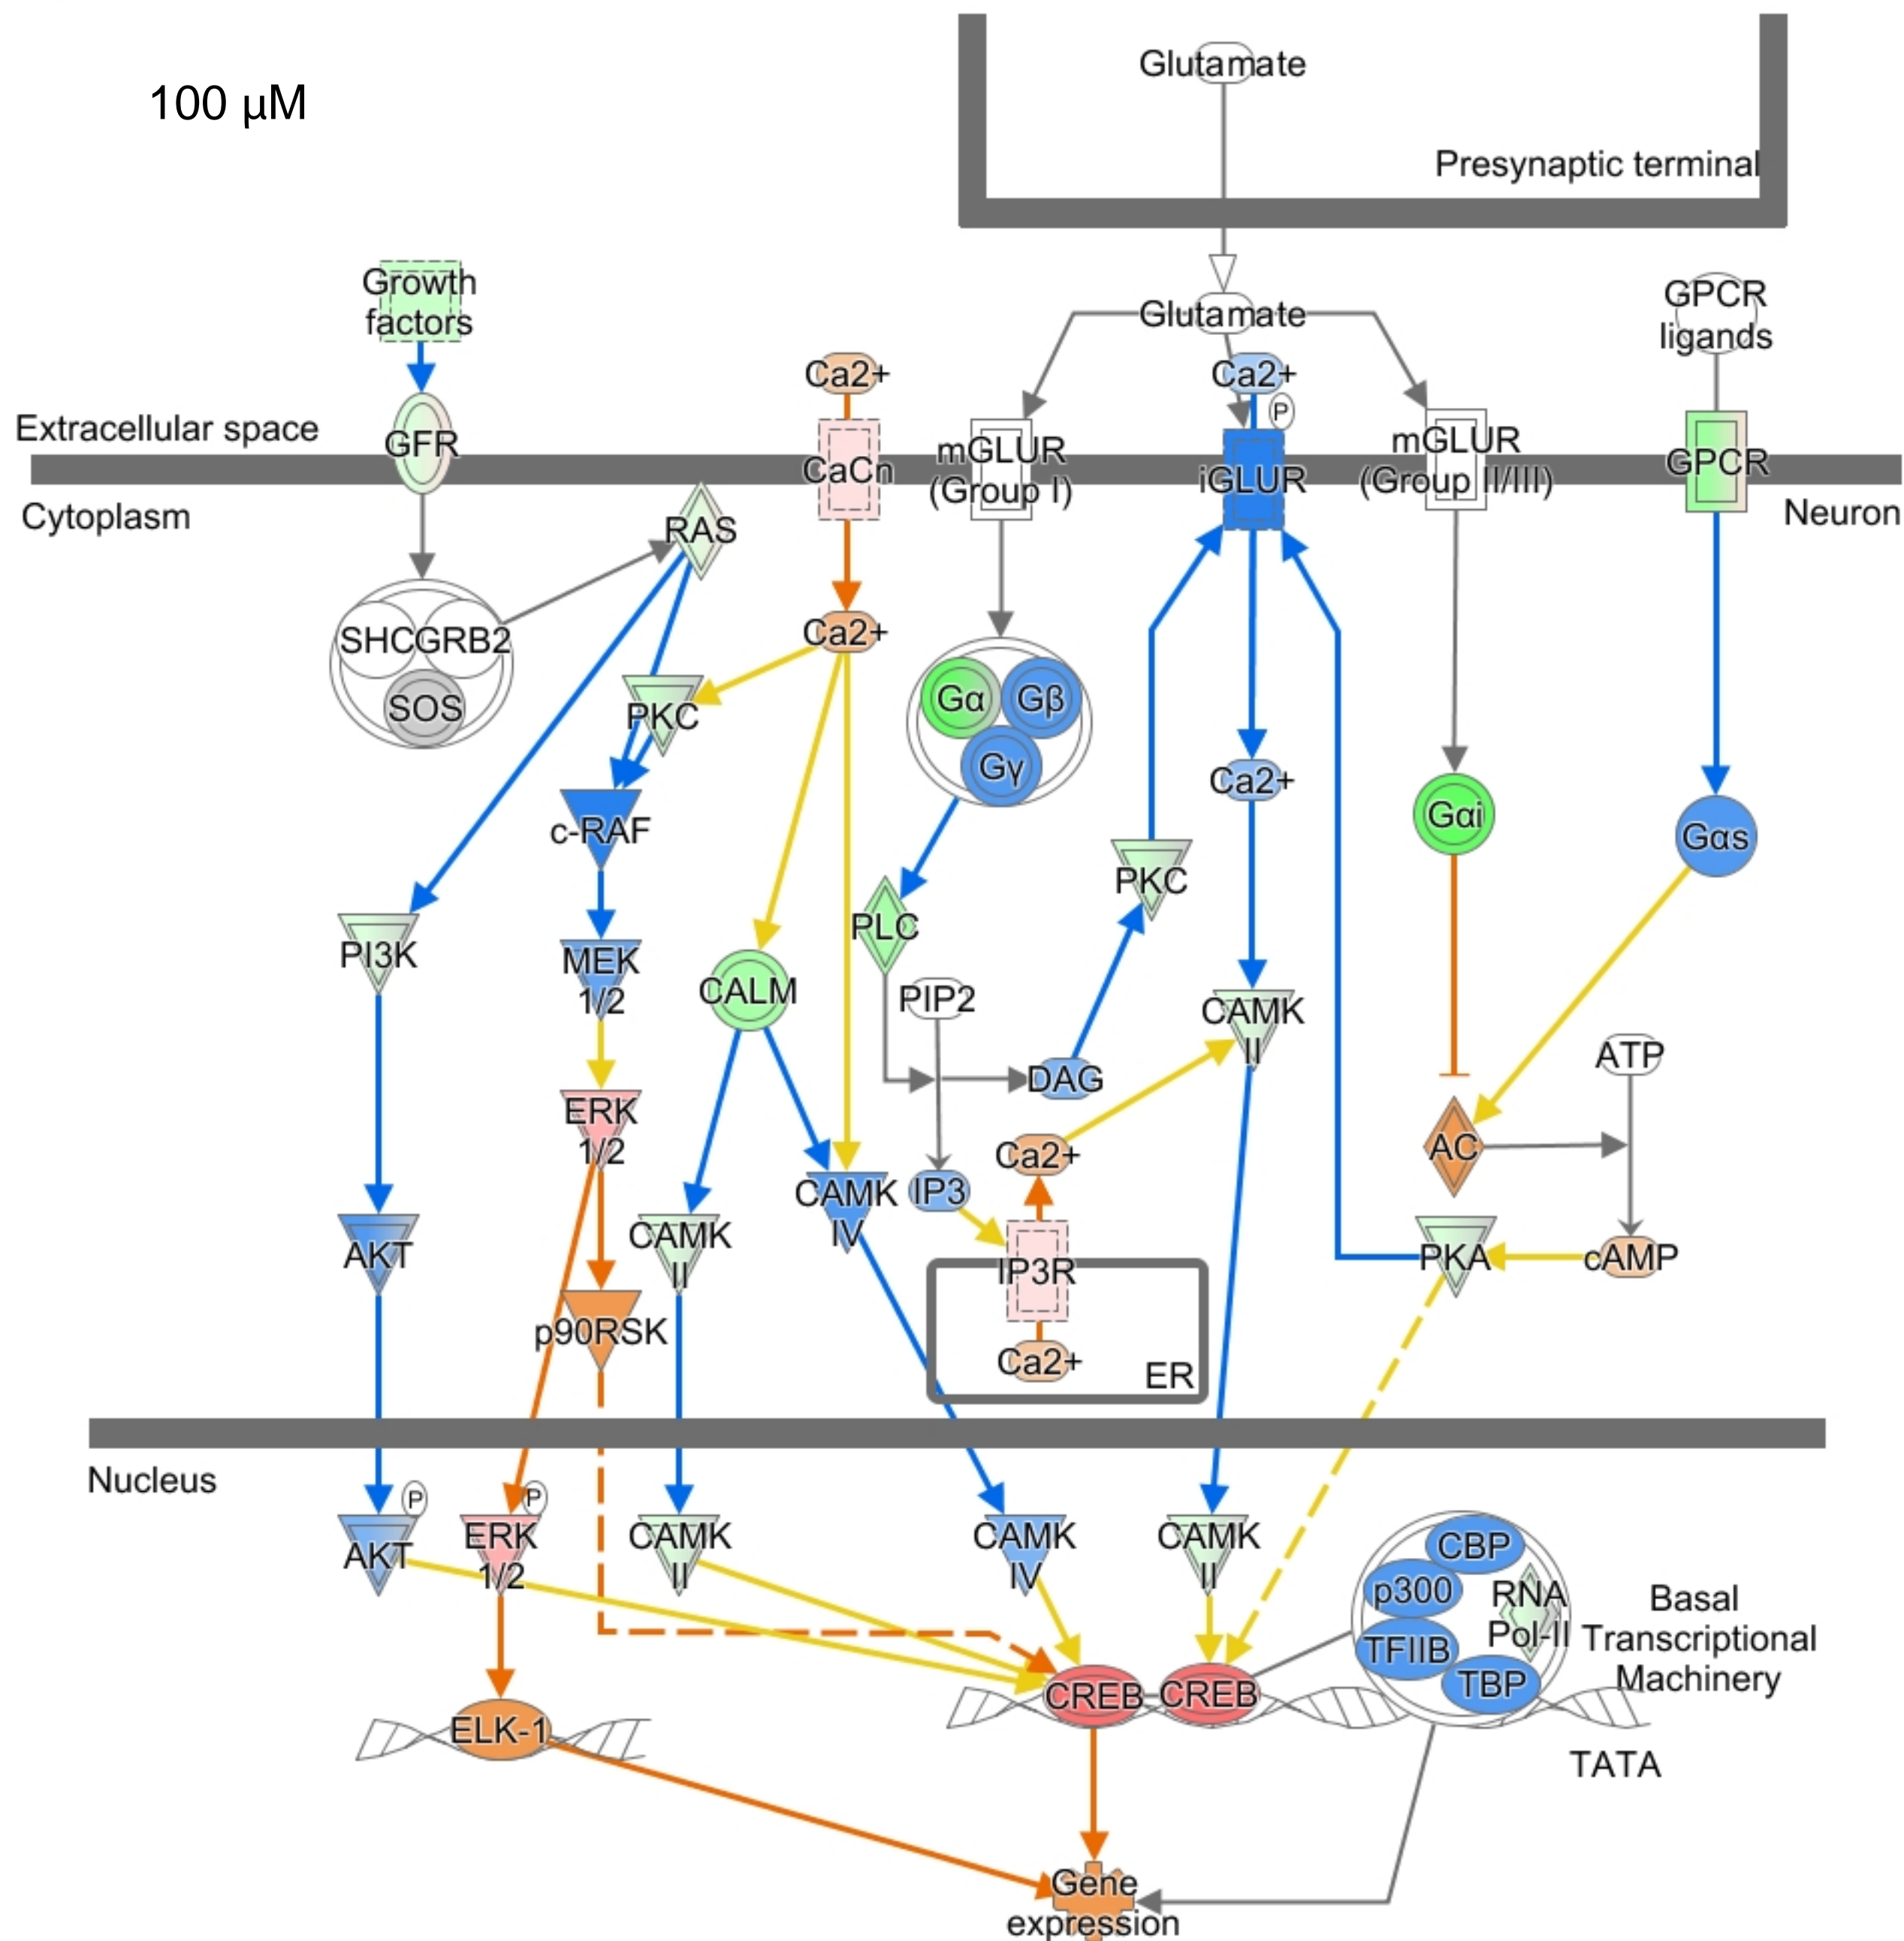

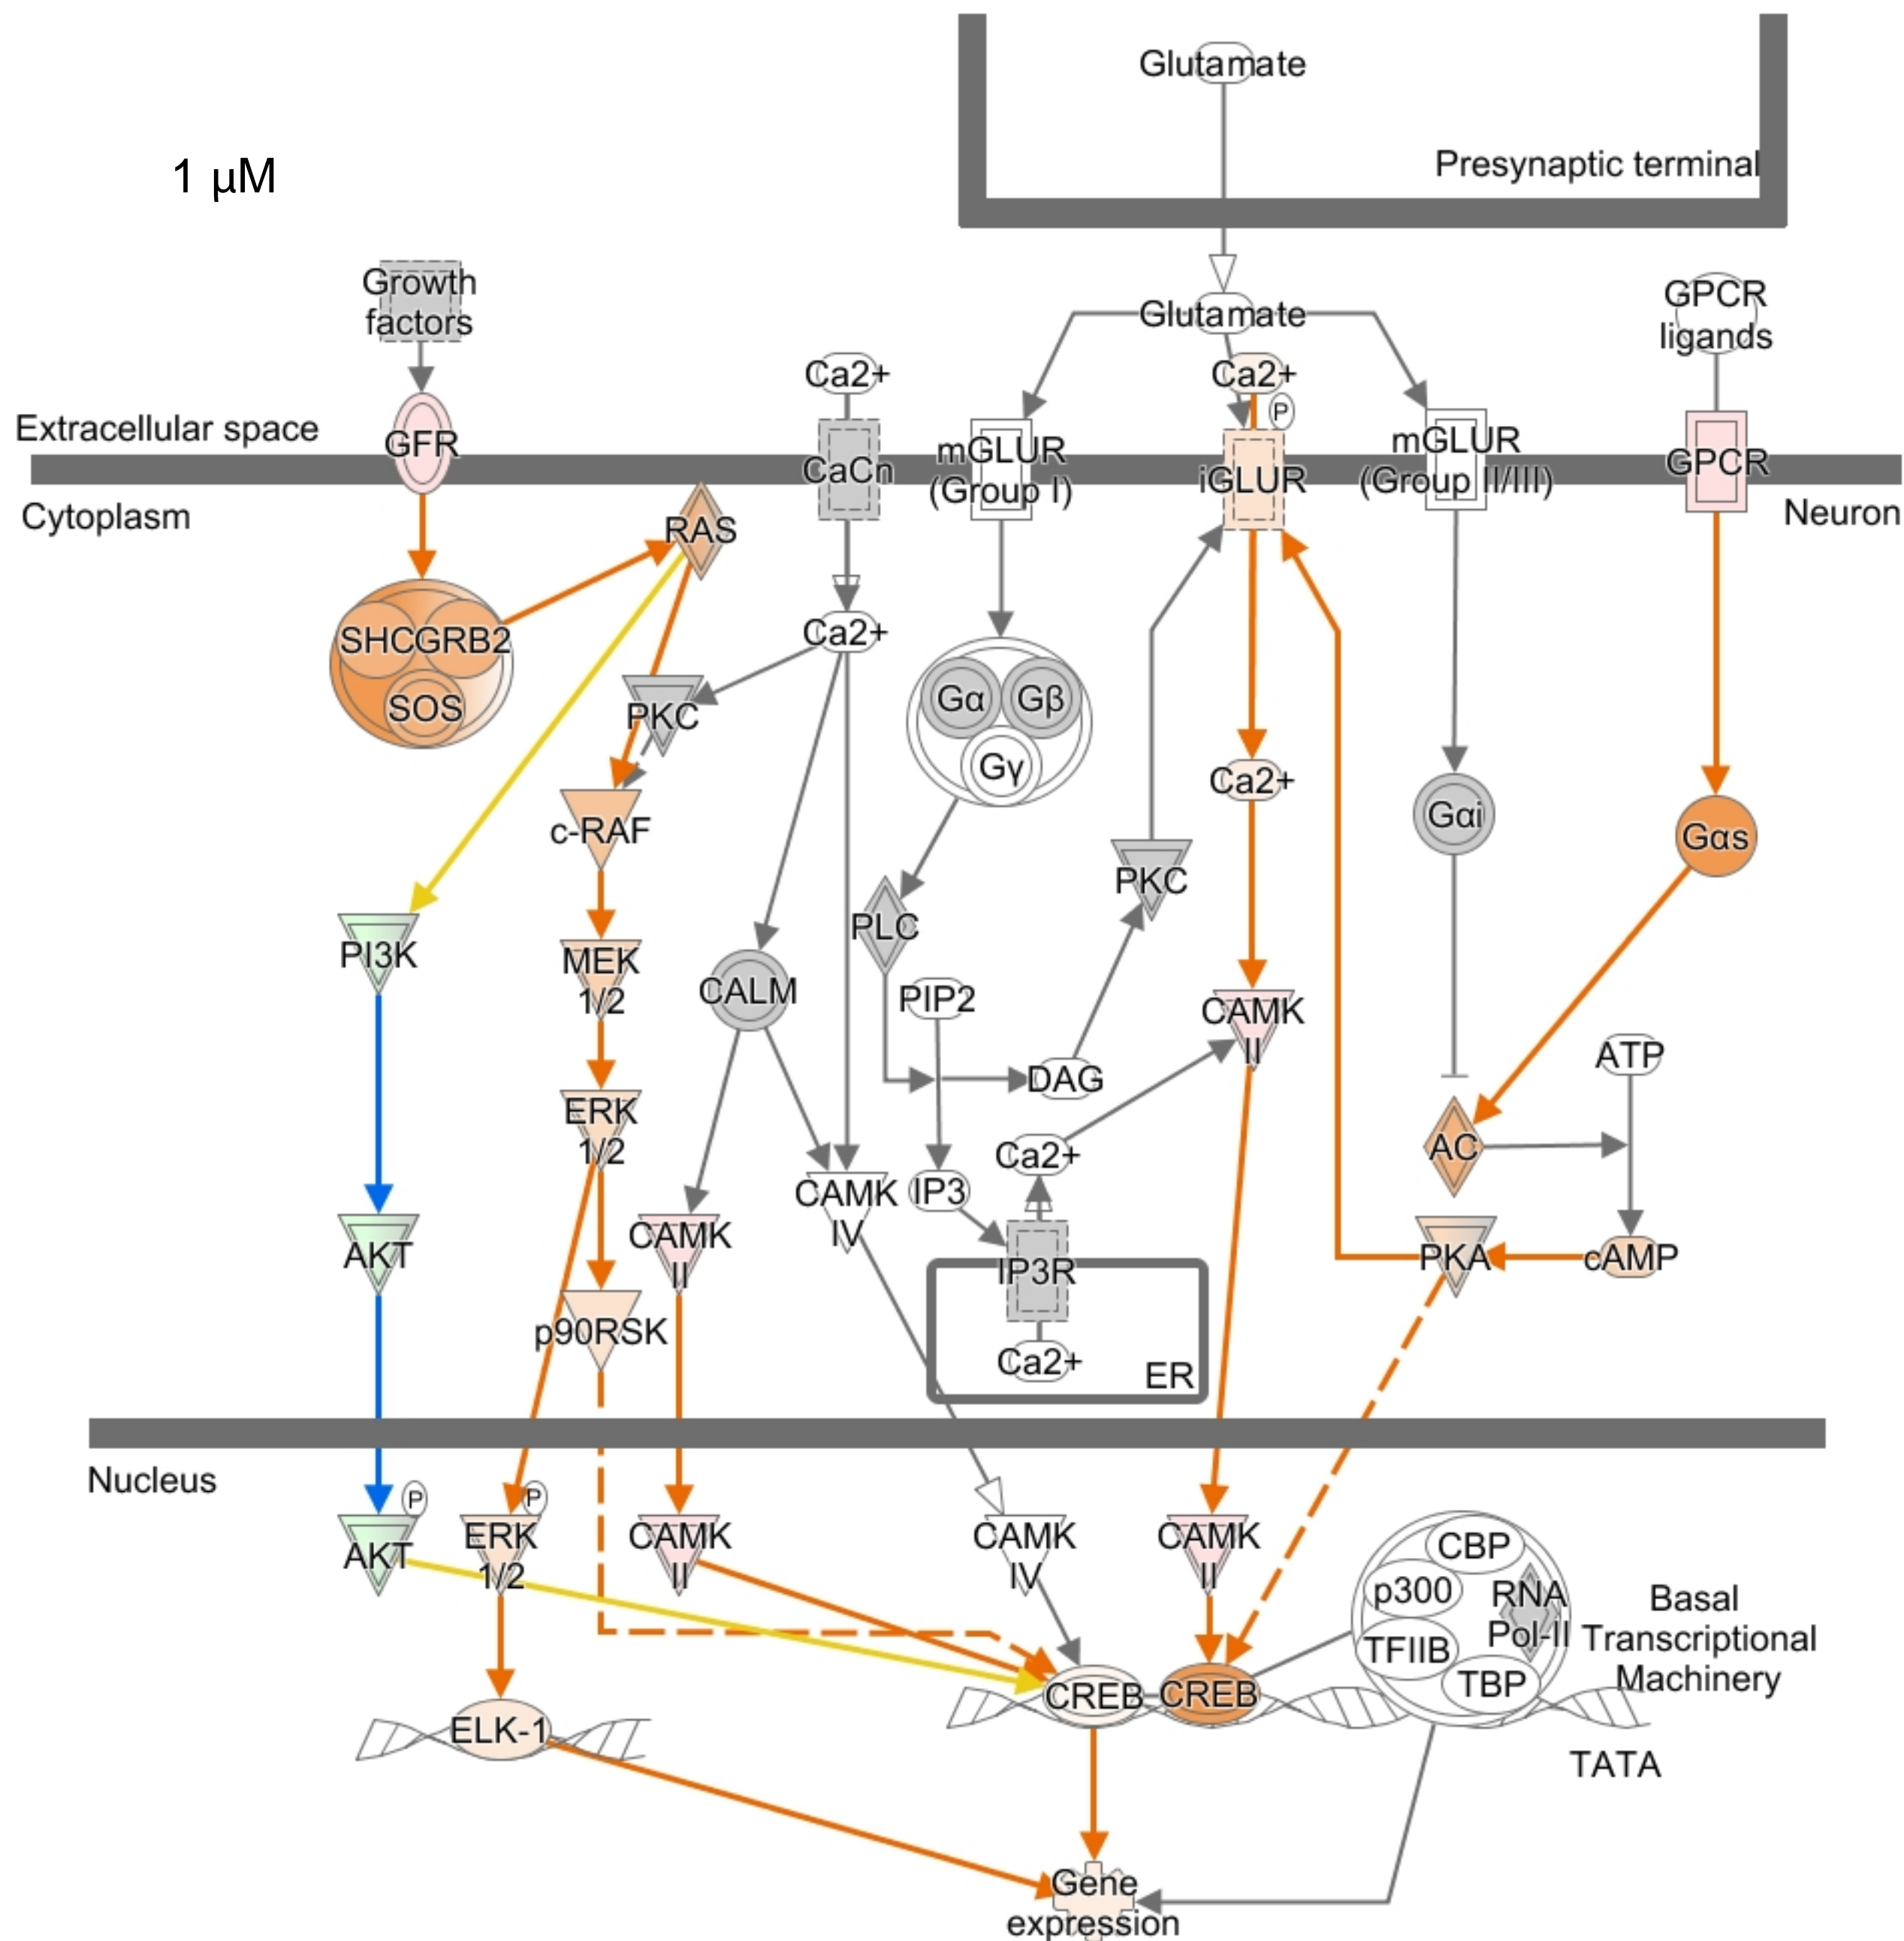



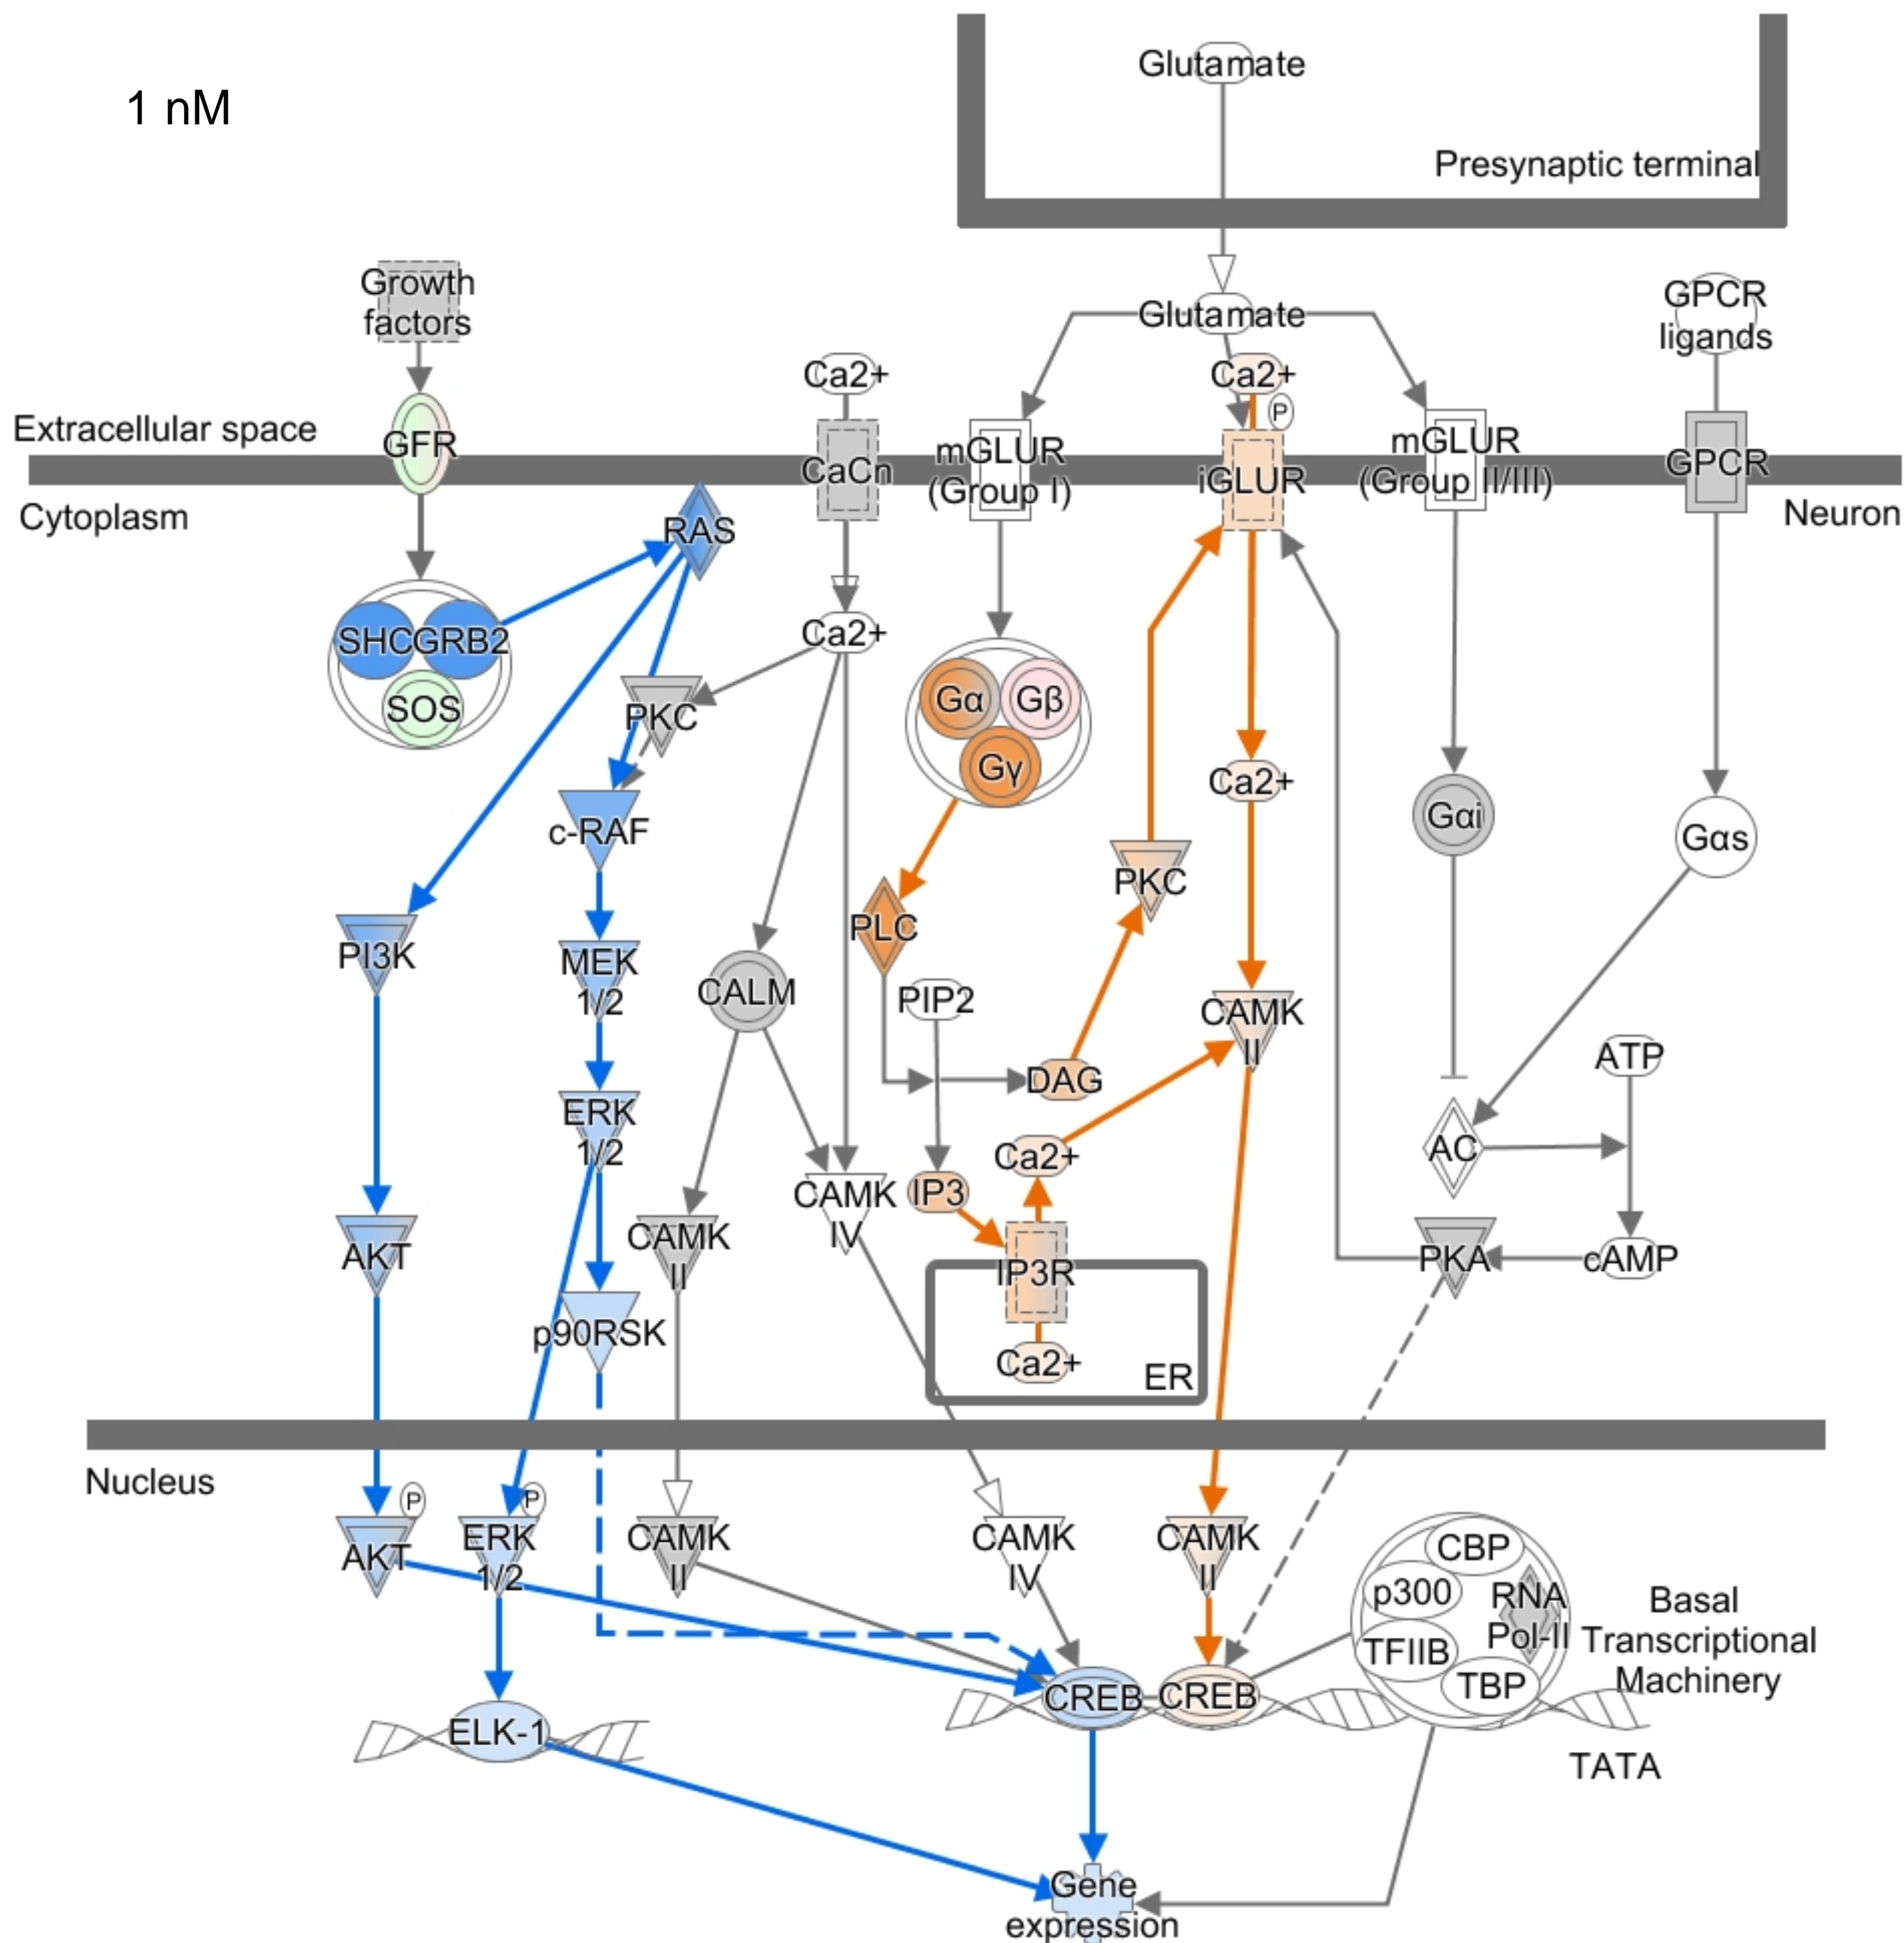

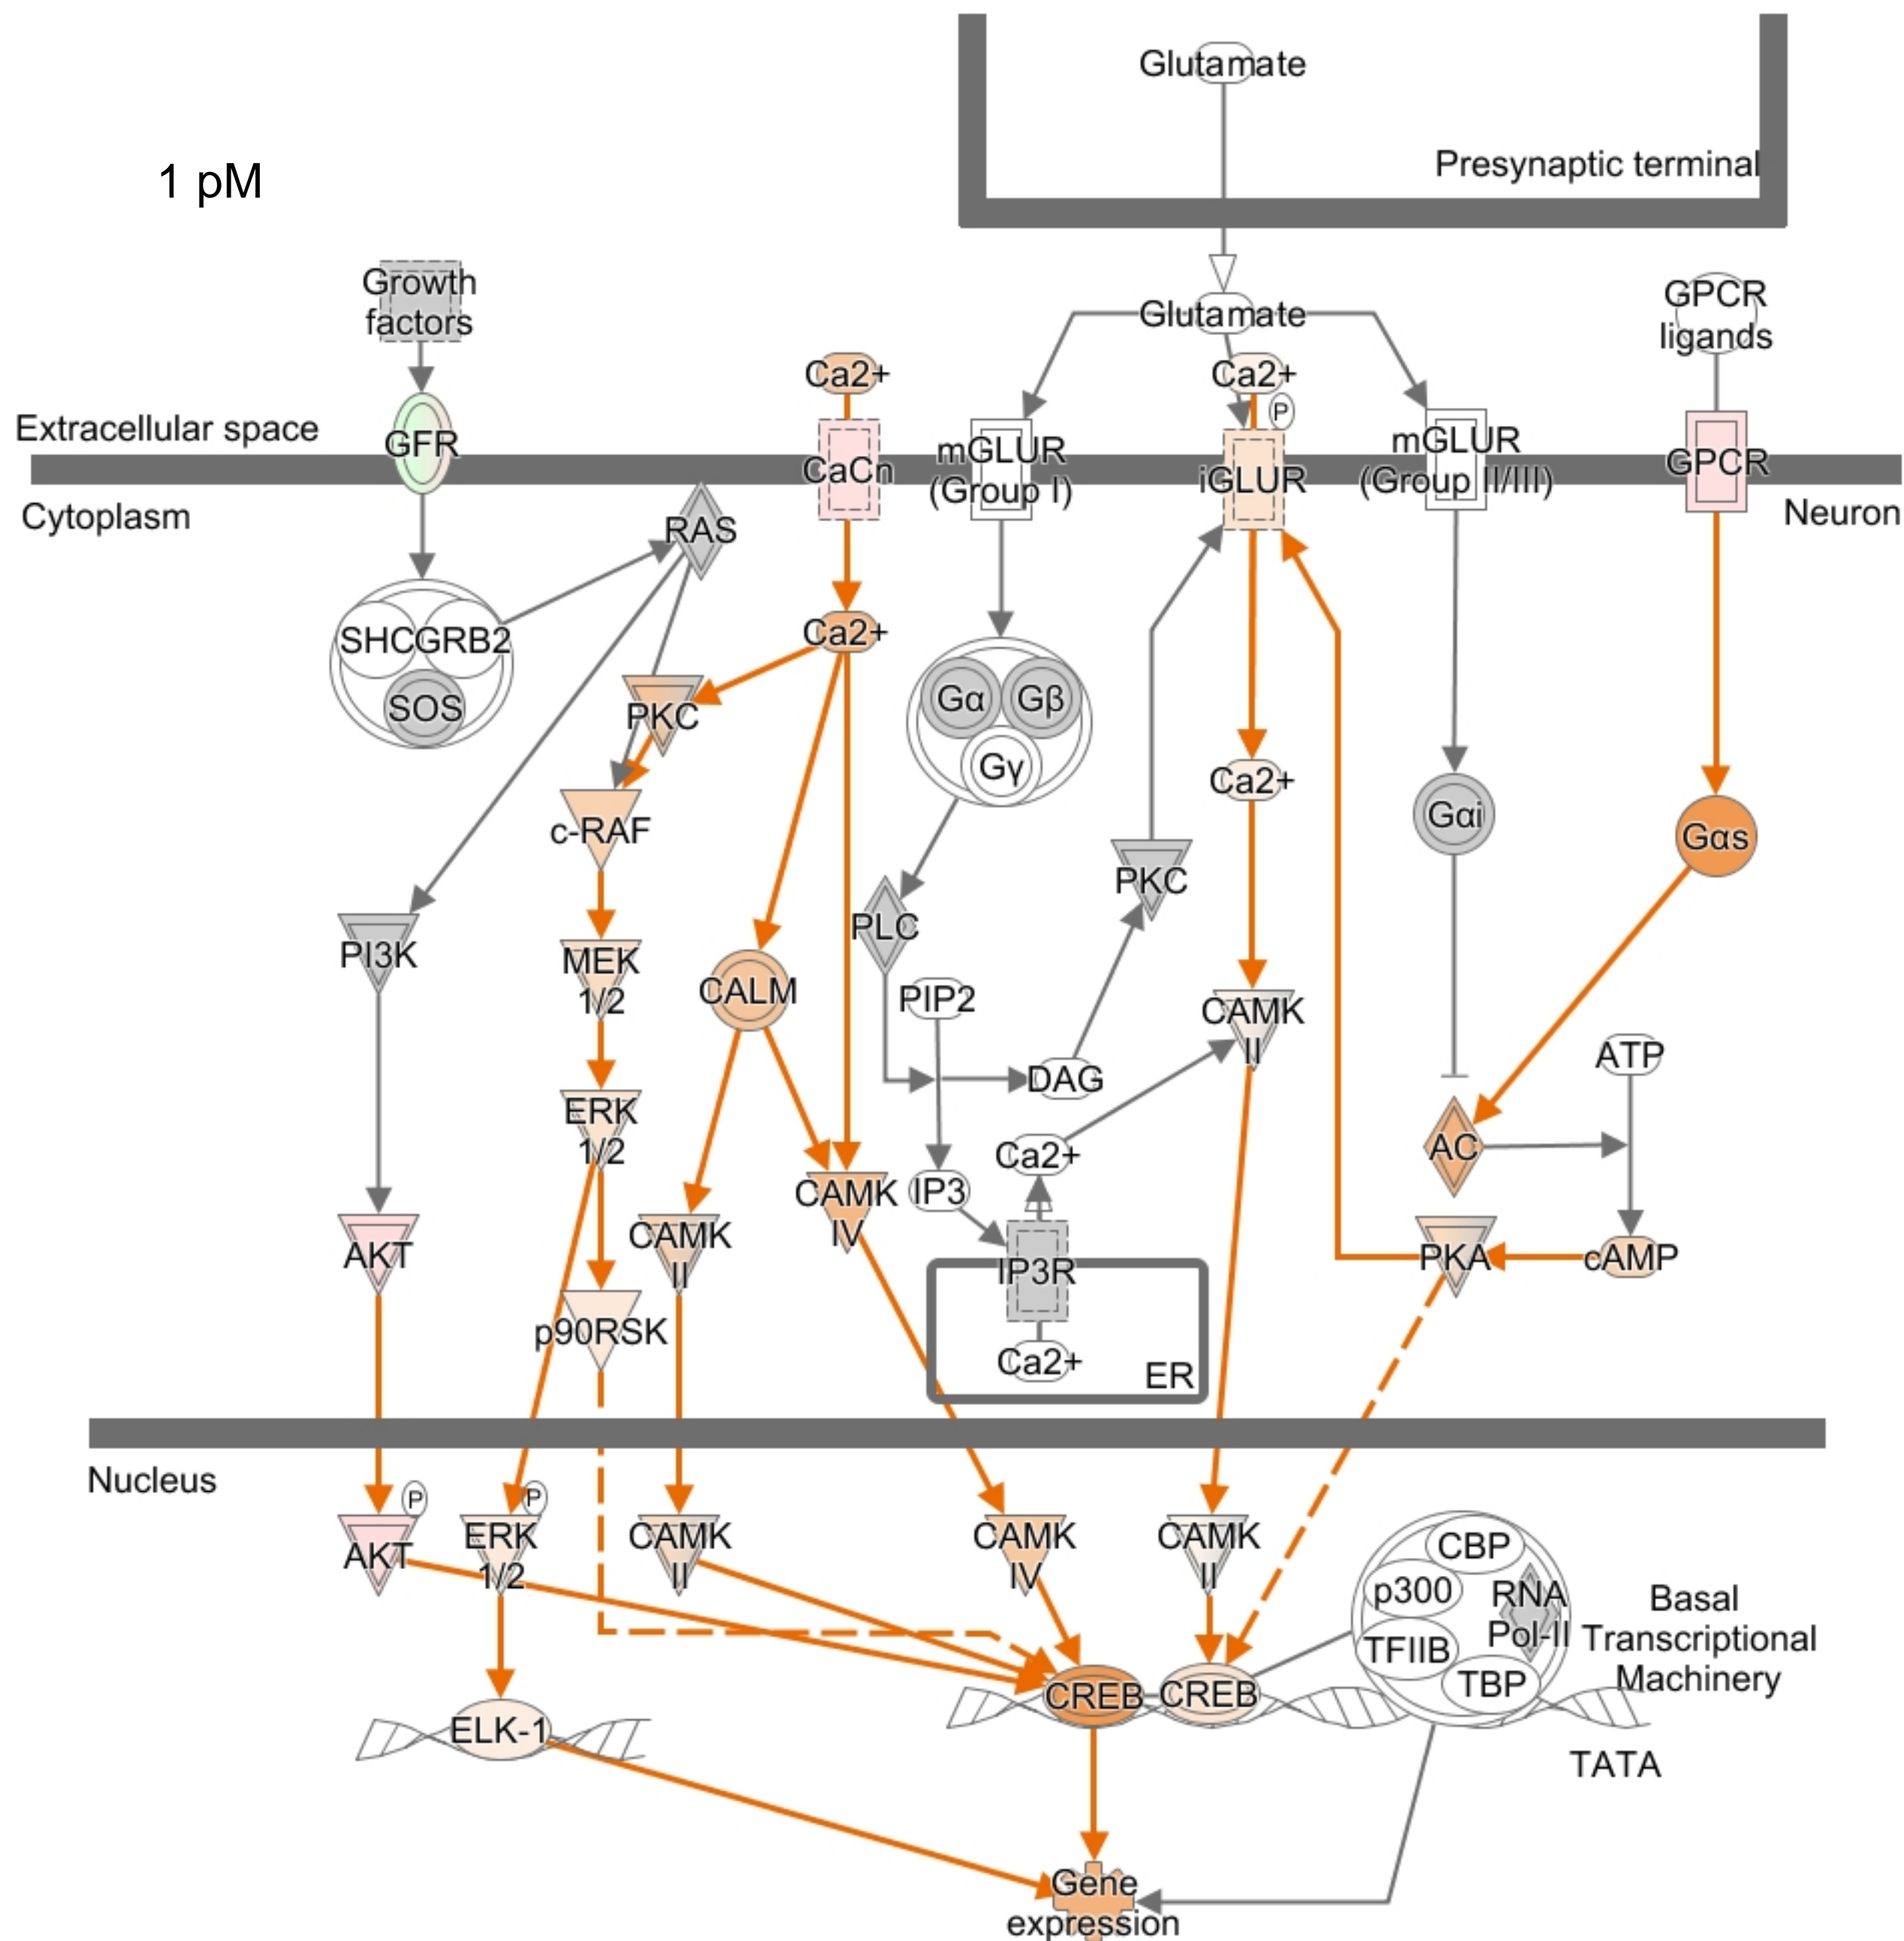



1 fM

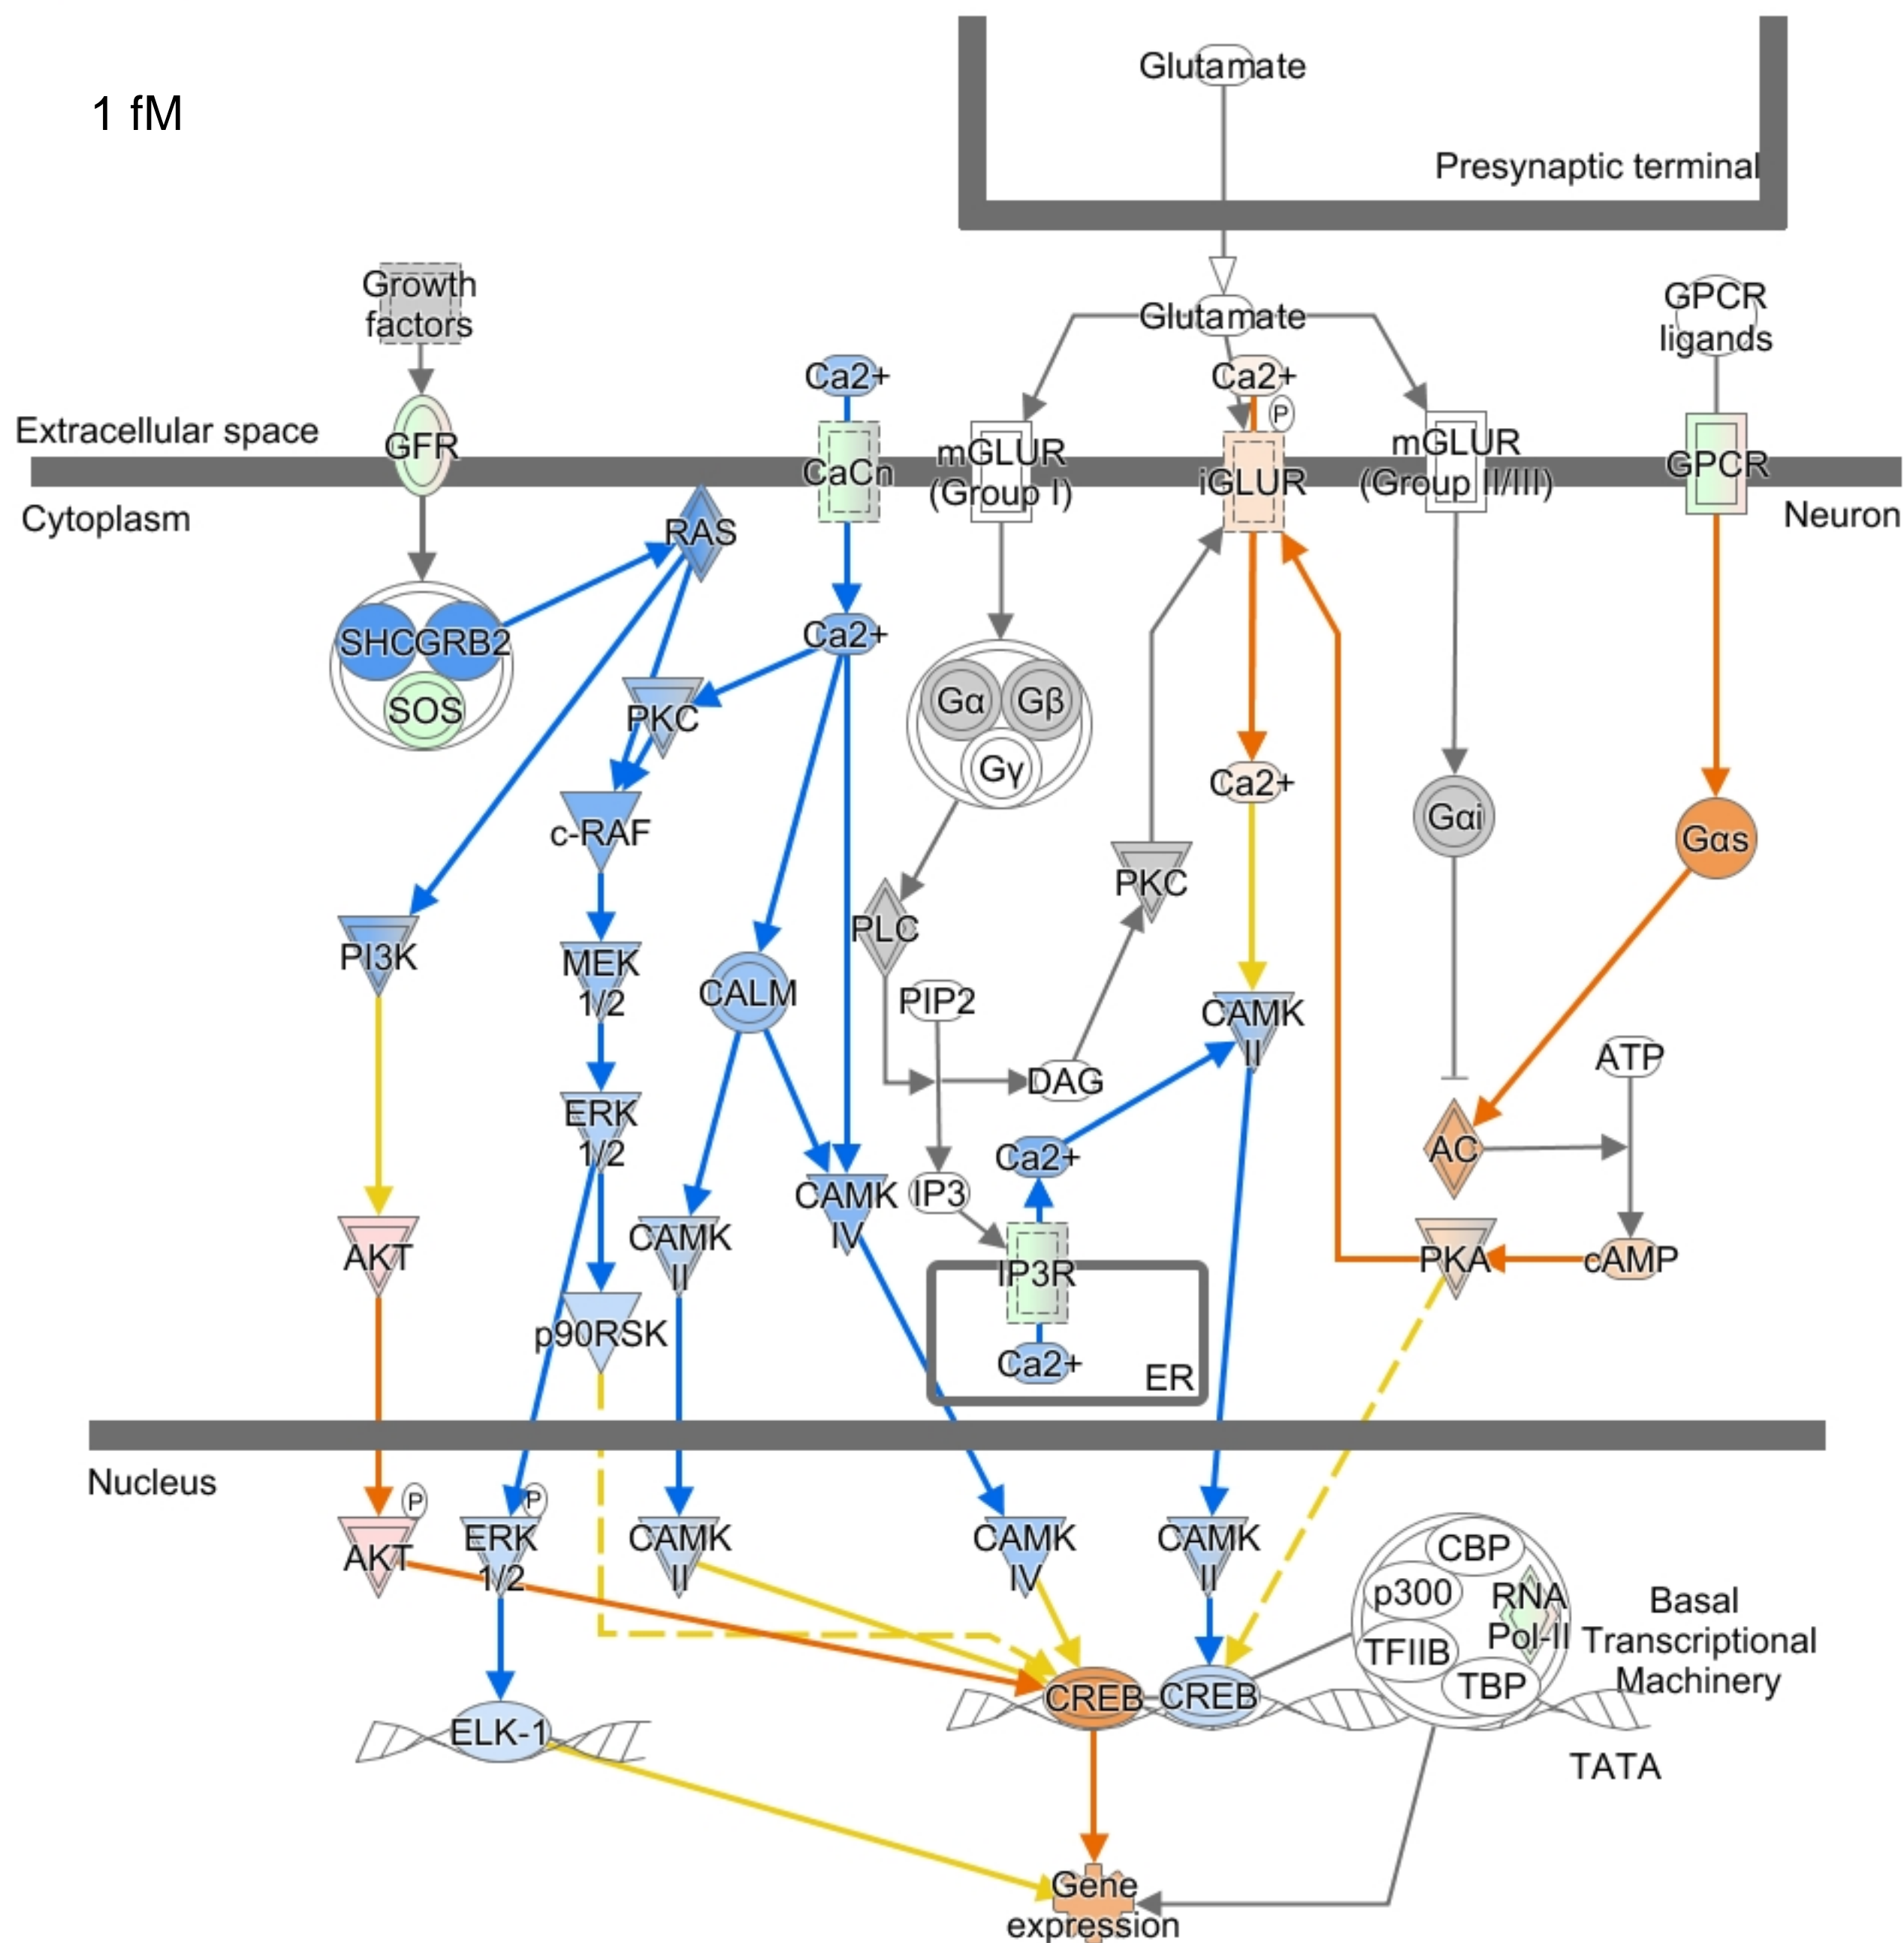

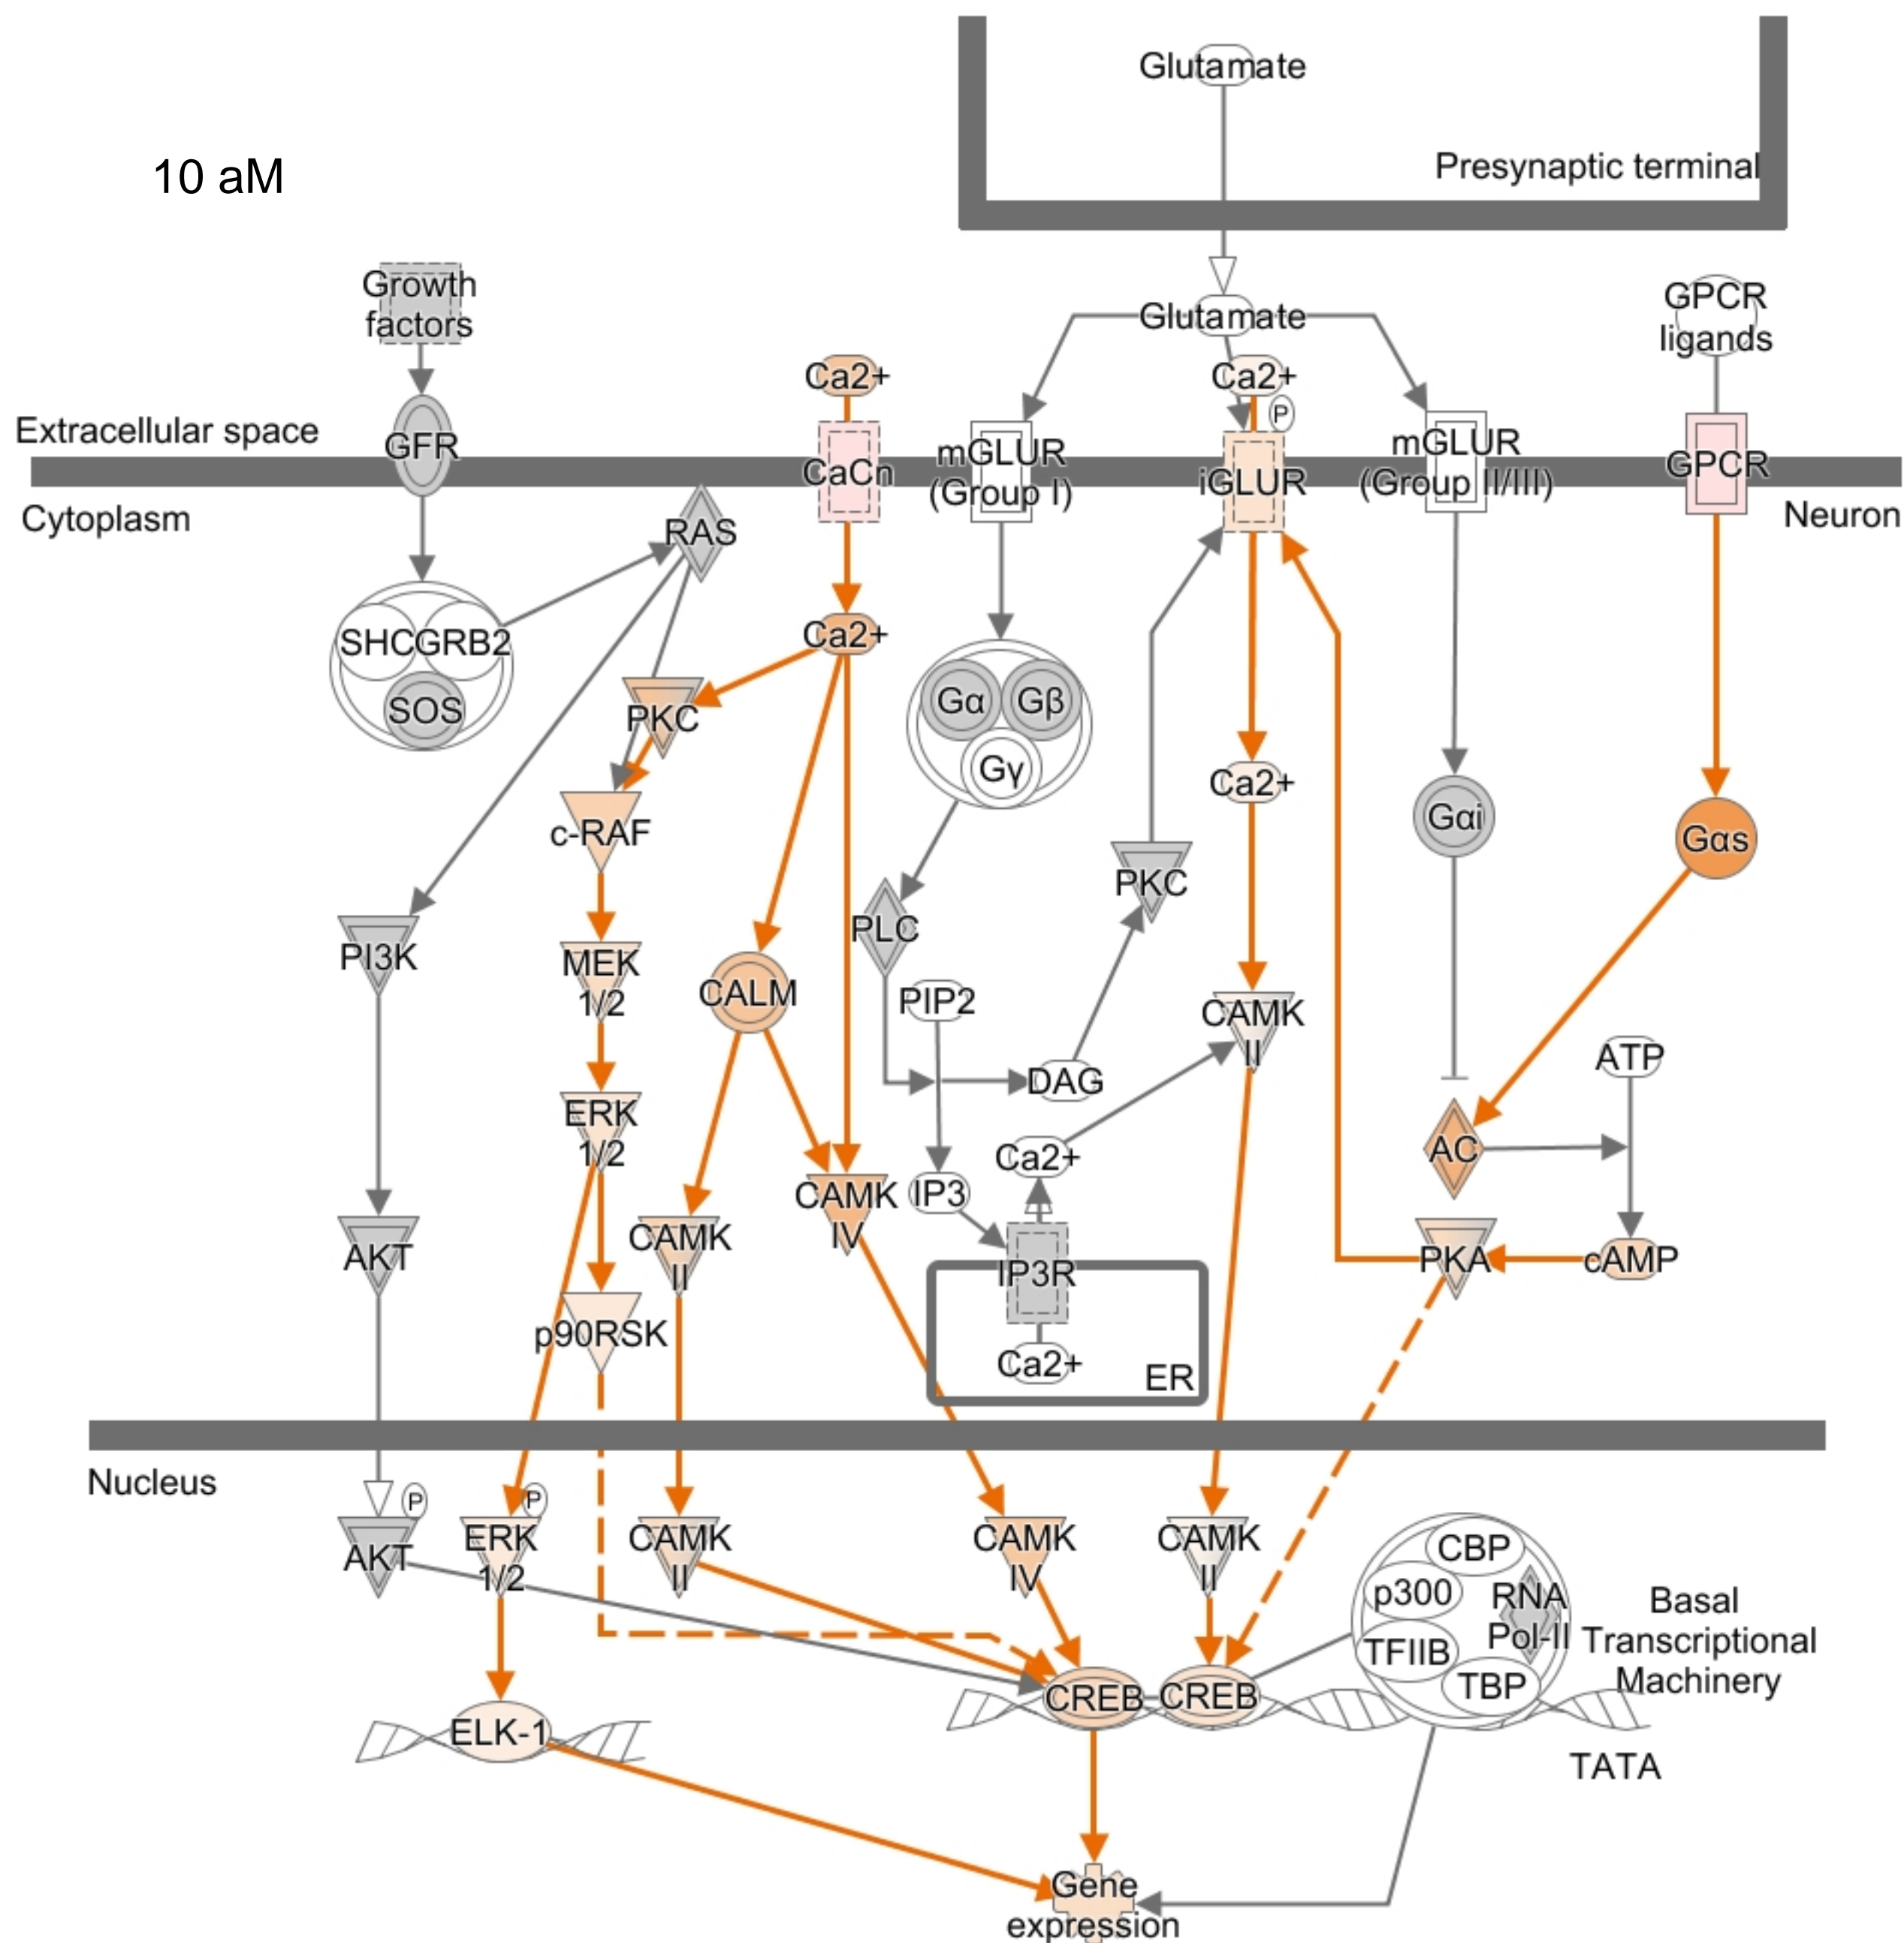



1 aM

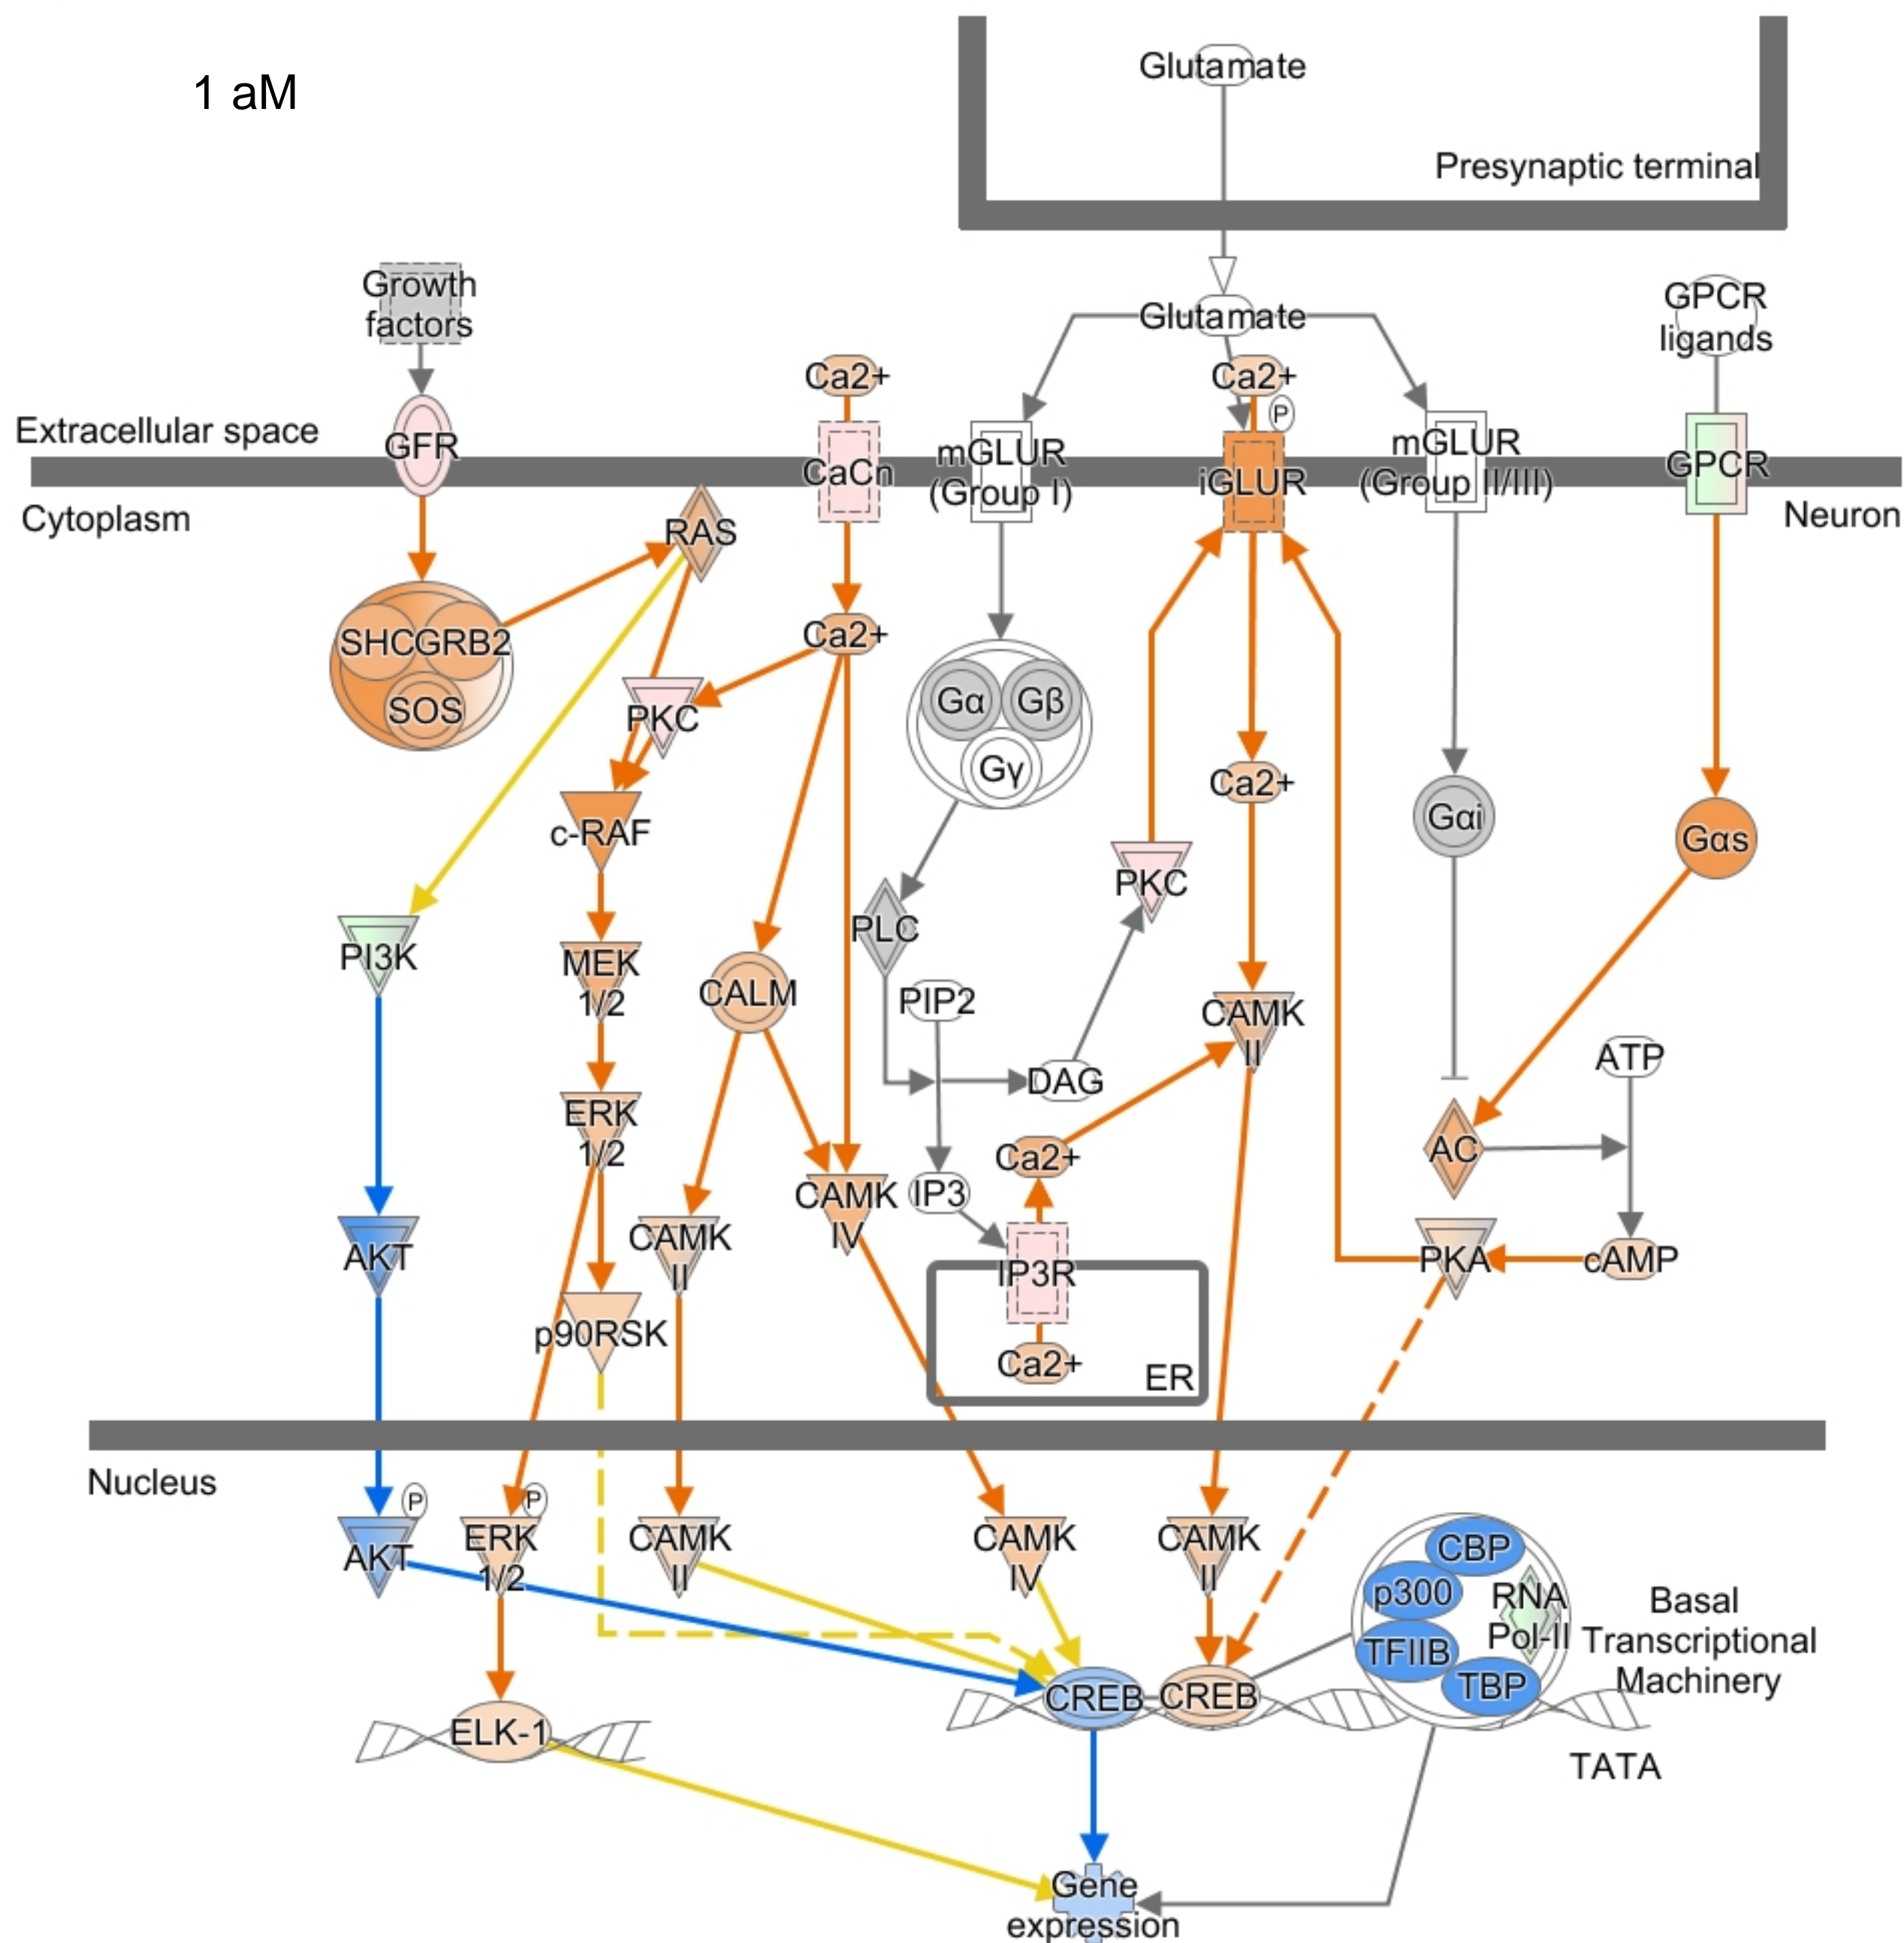

Supplement: Supplementary file 4 [file supplementary]

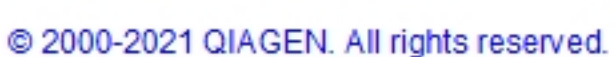



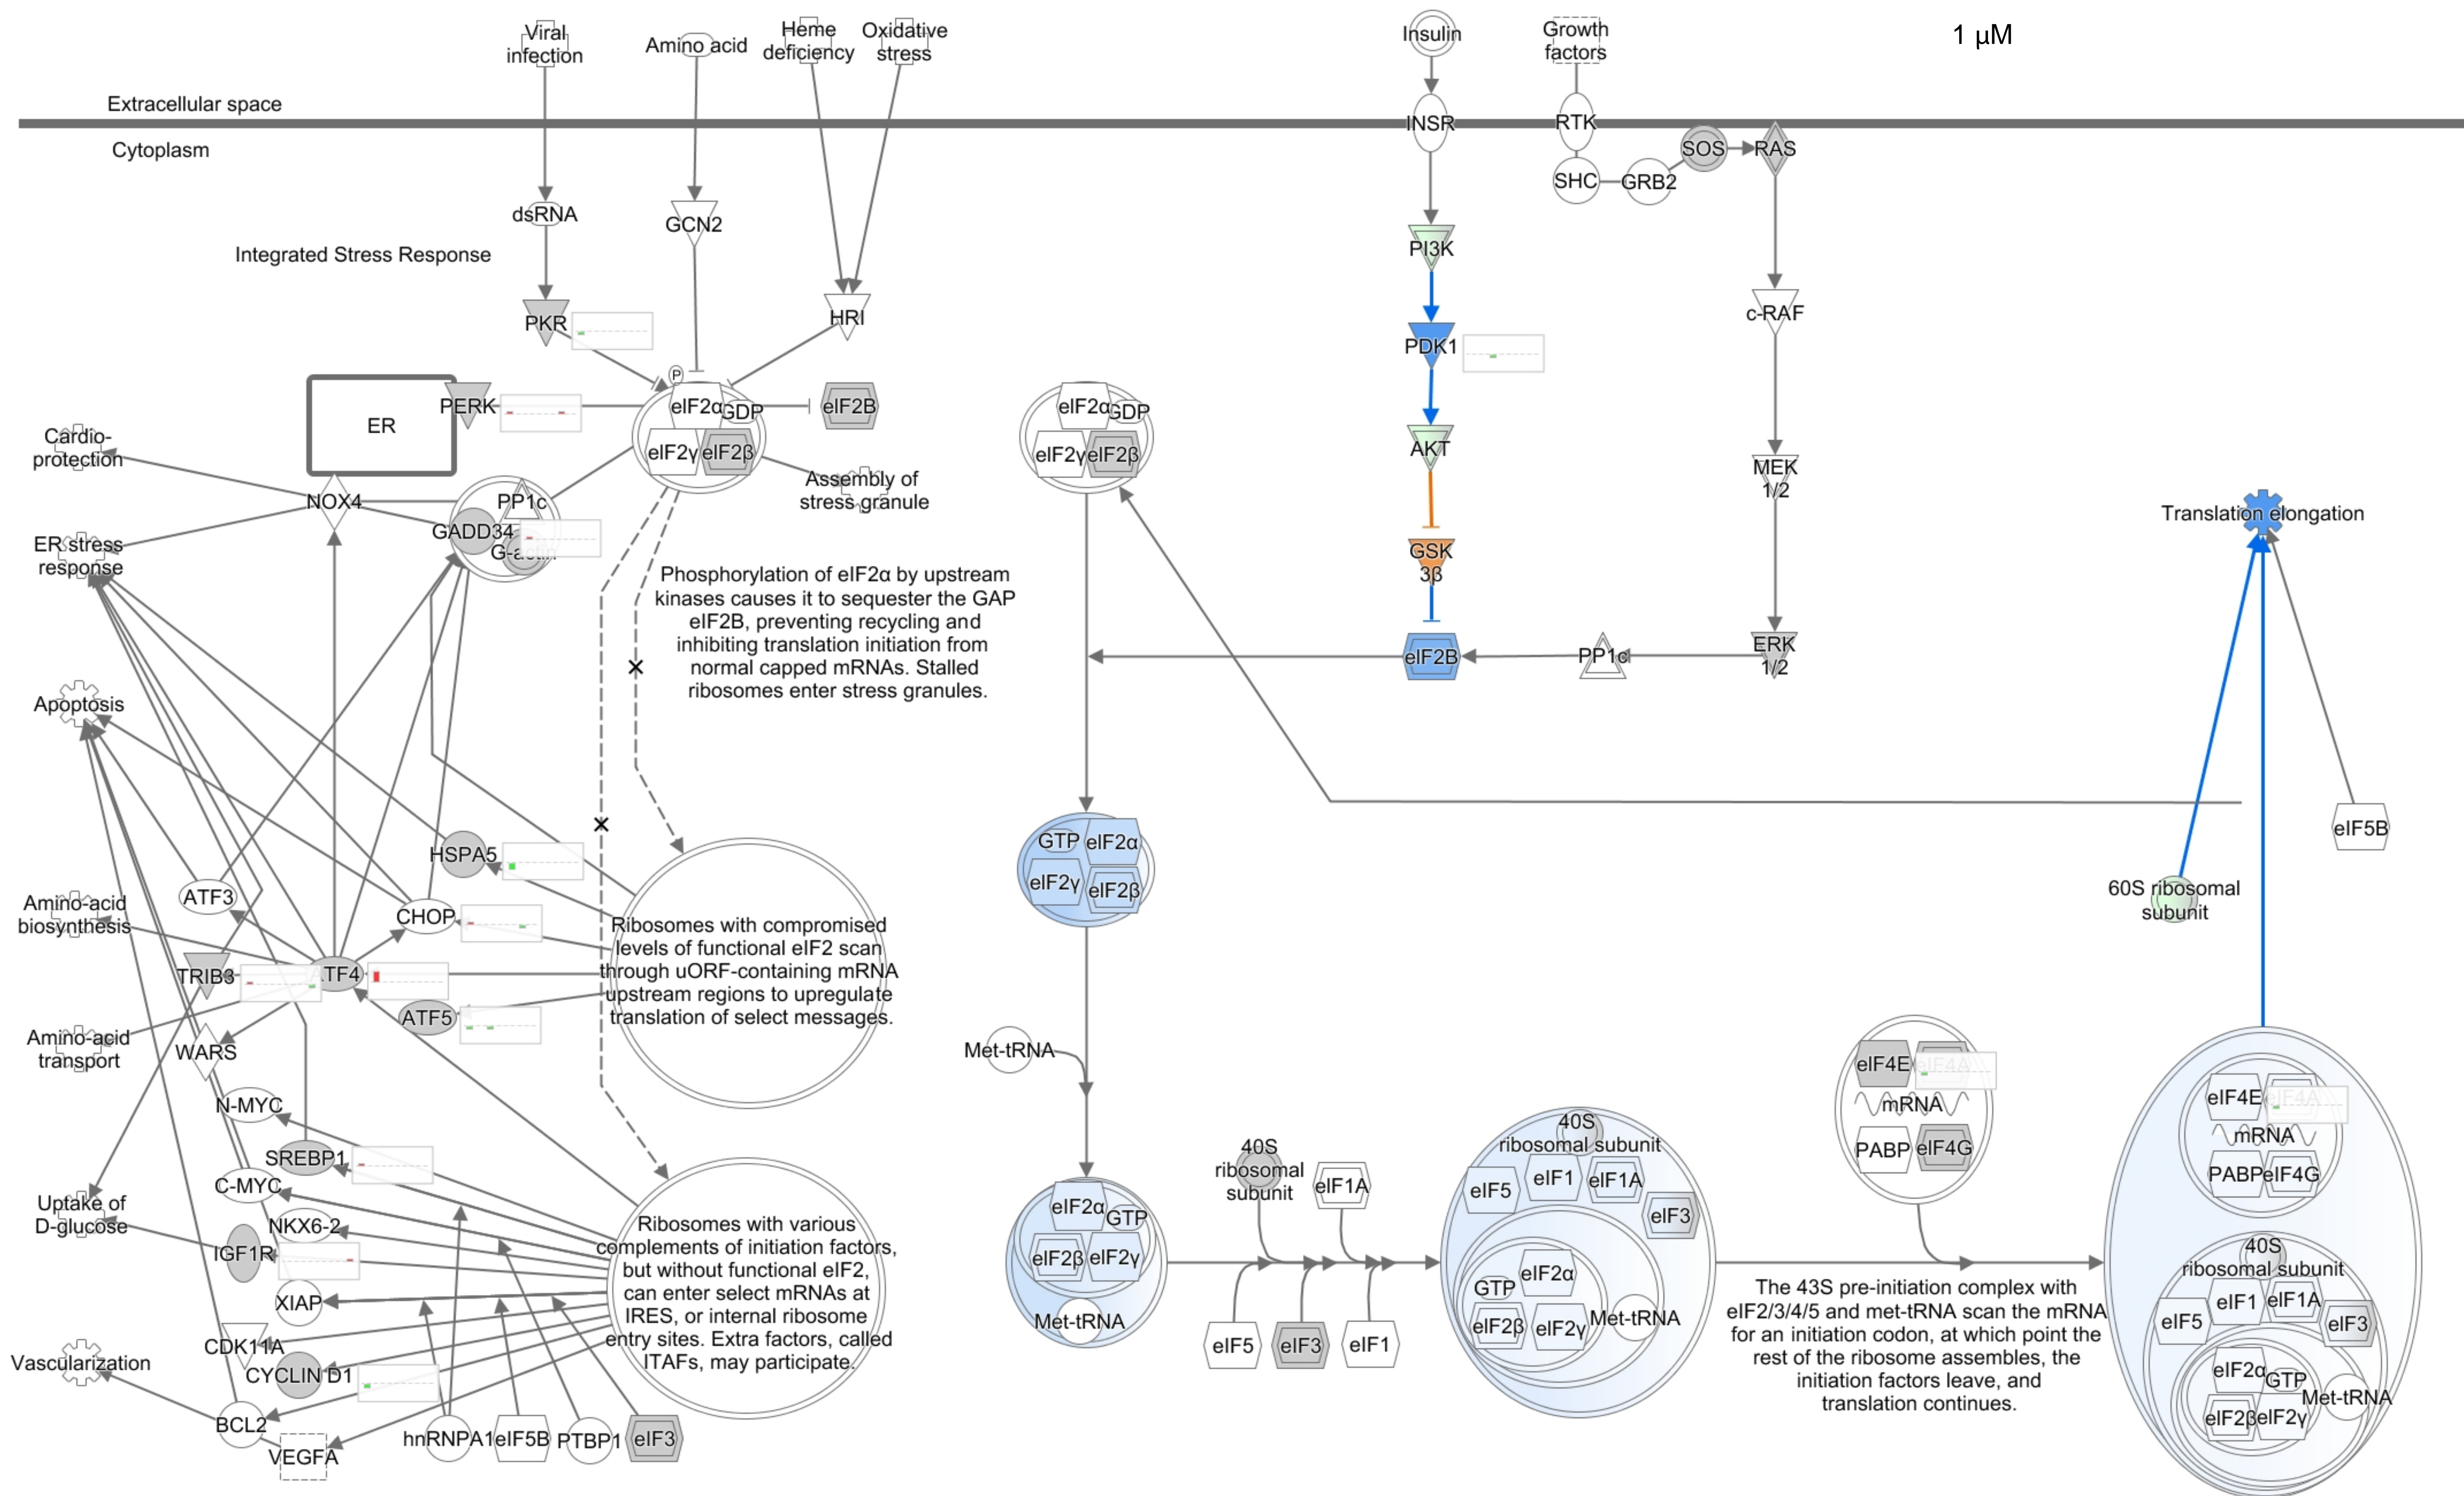



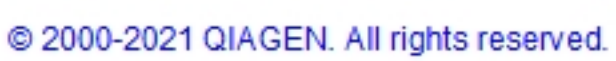



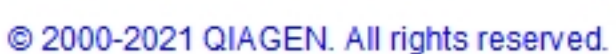



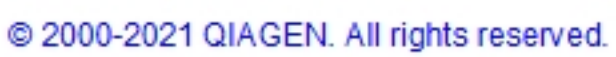







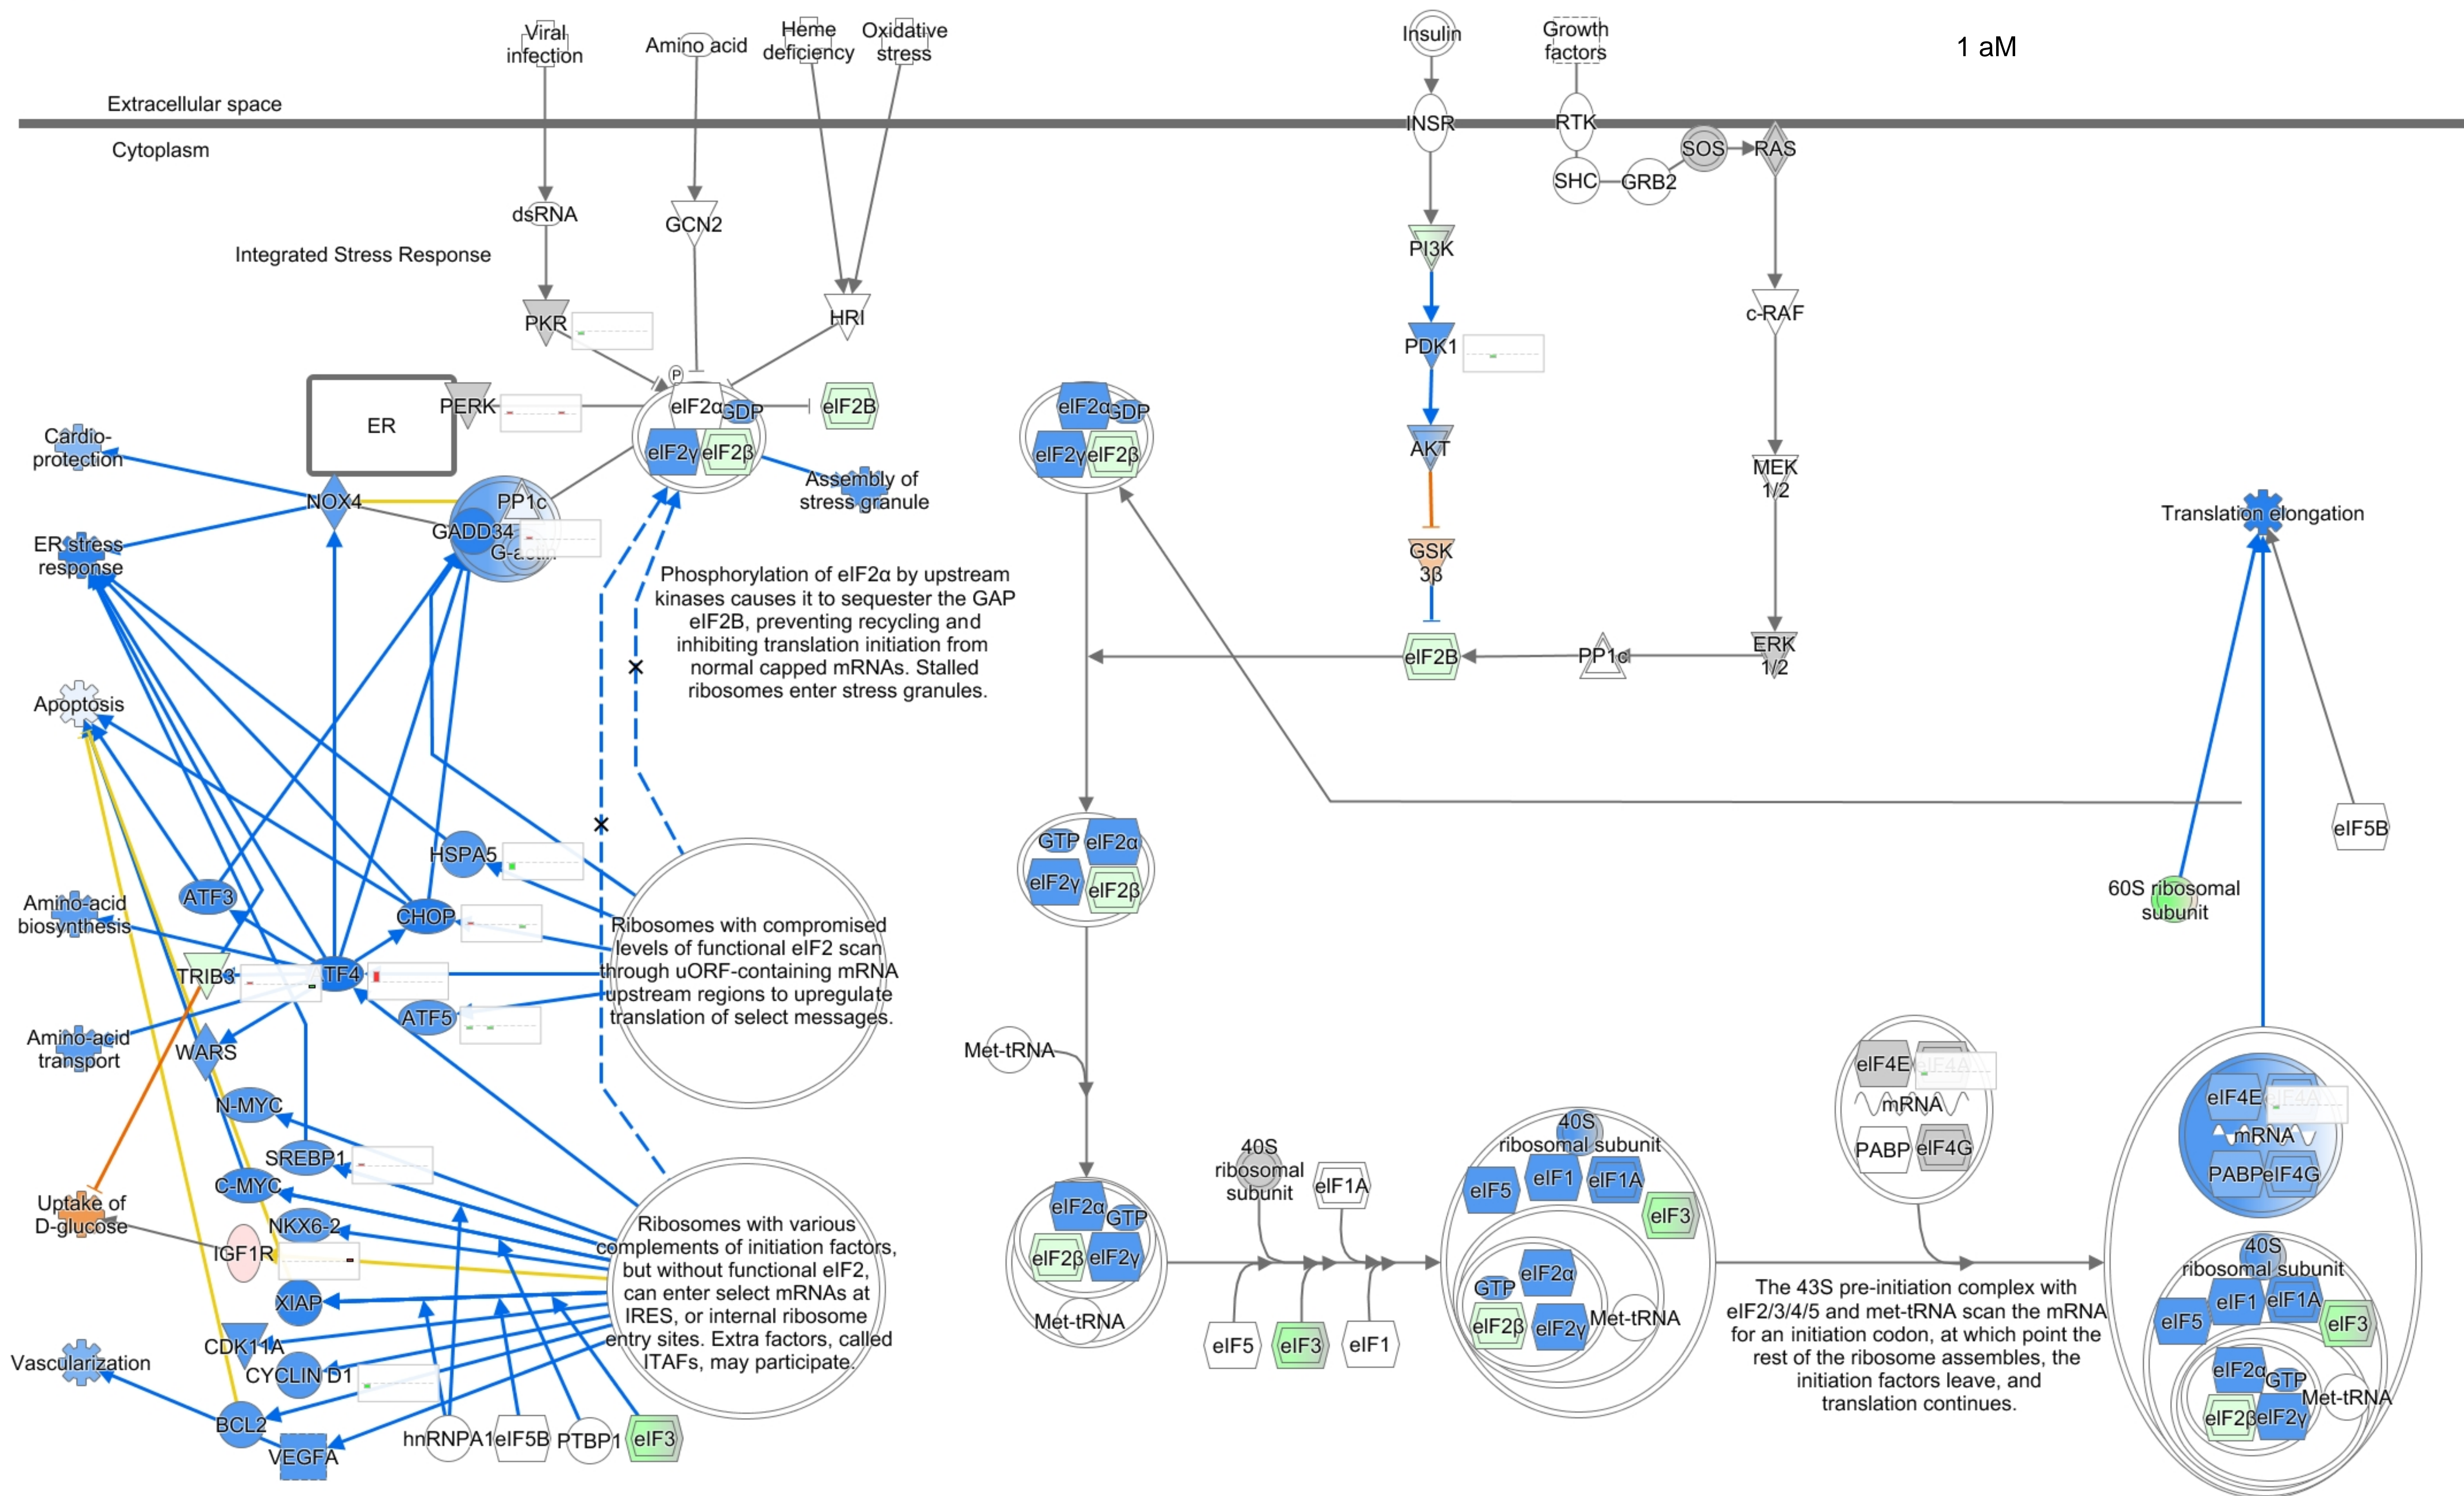

Supplement: Supplementary file 6 [file supplementary]

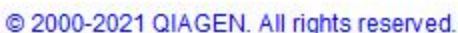

1  $\mu$ M

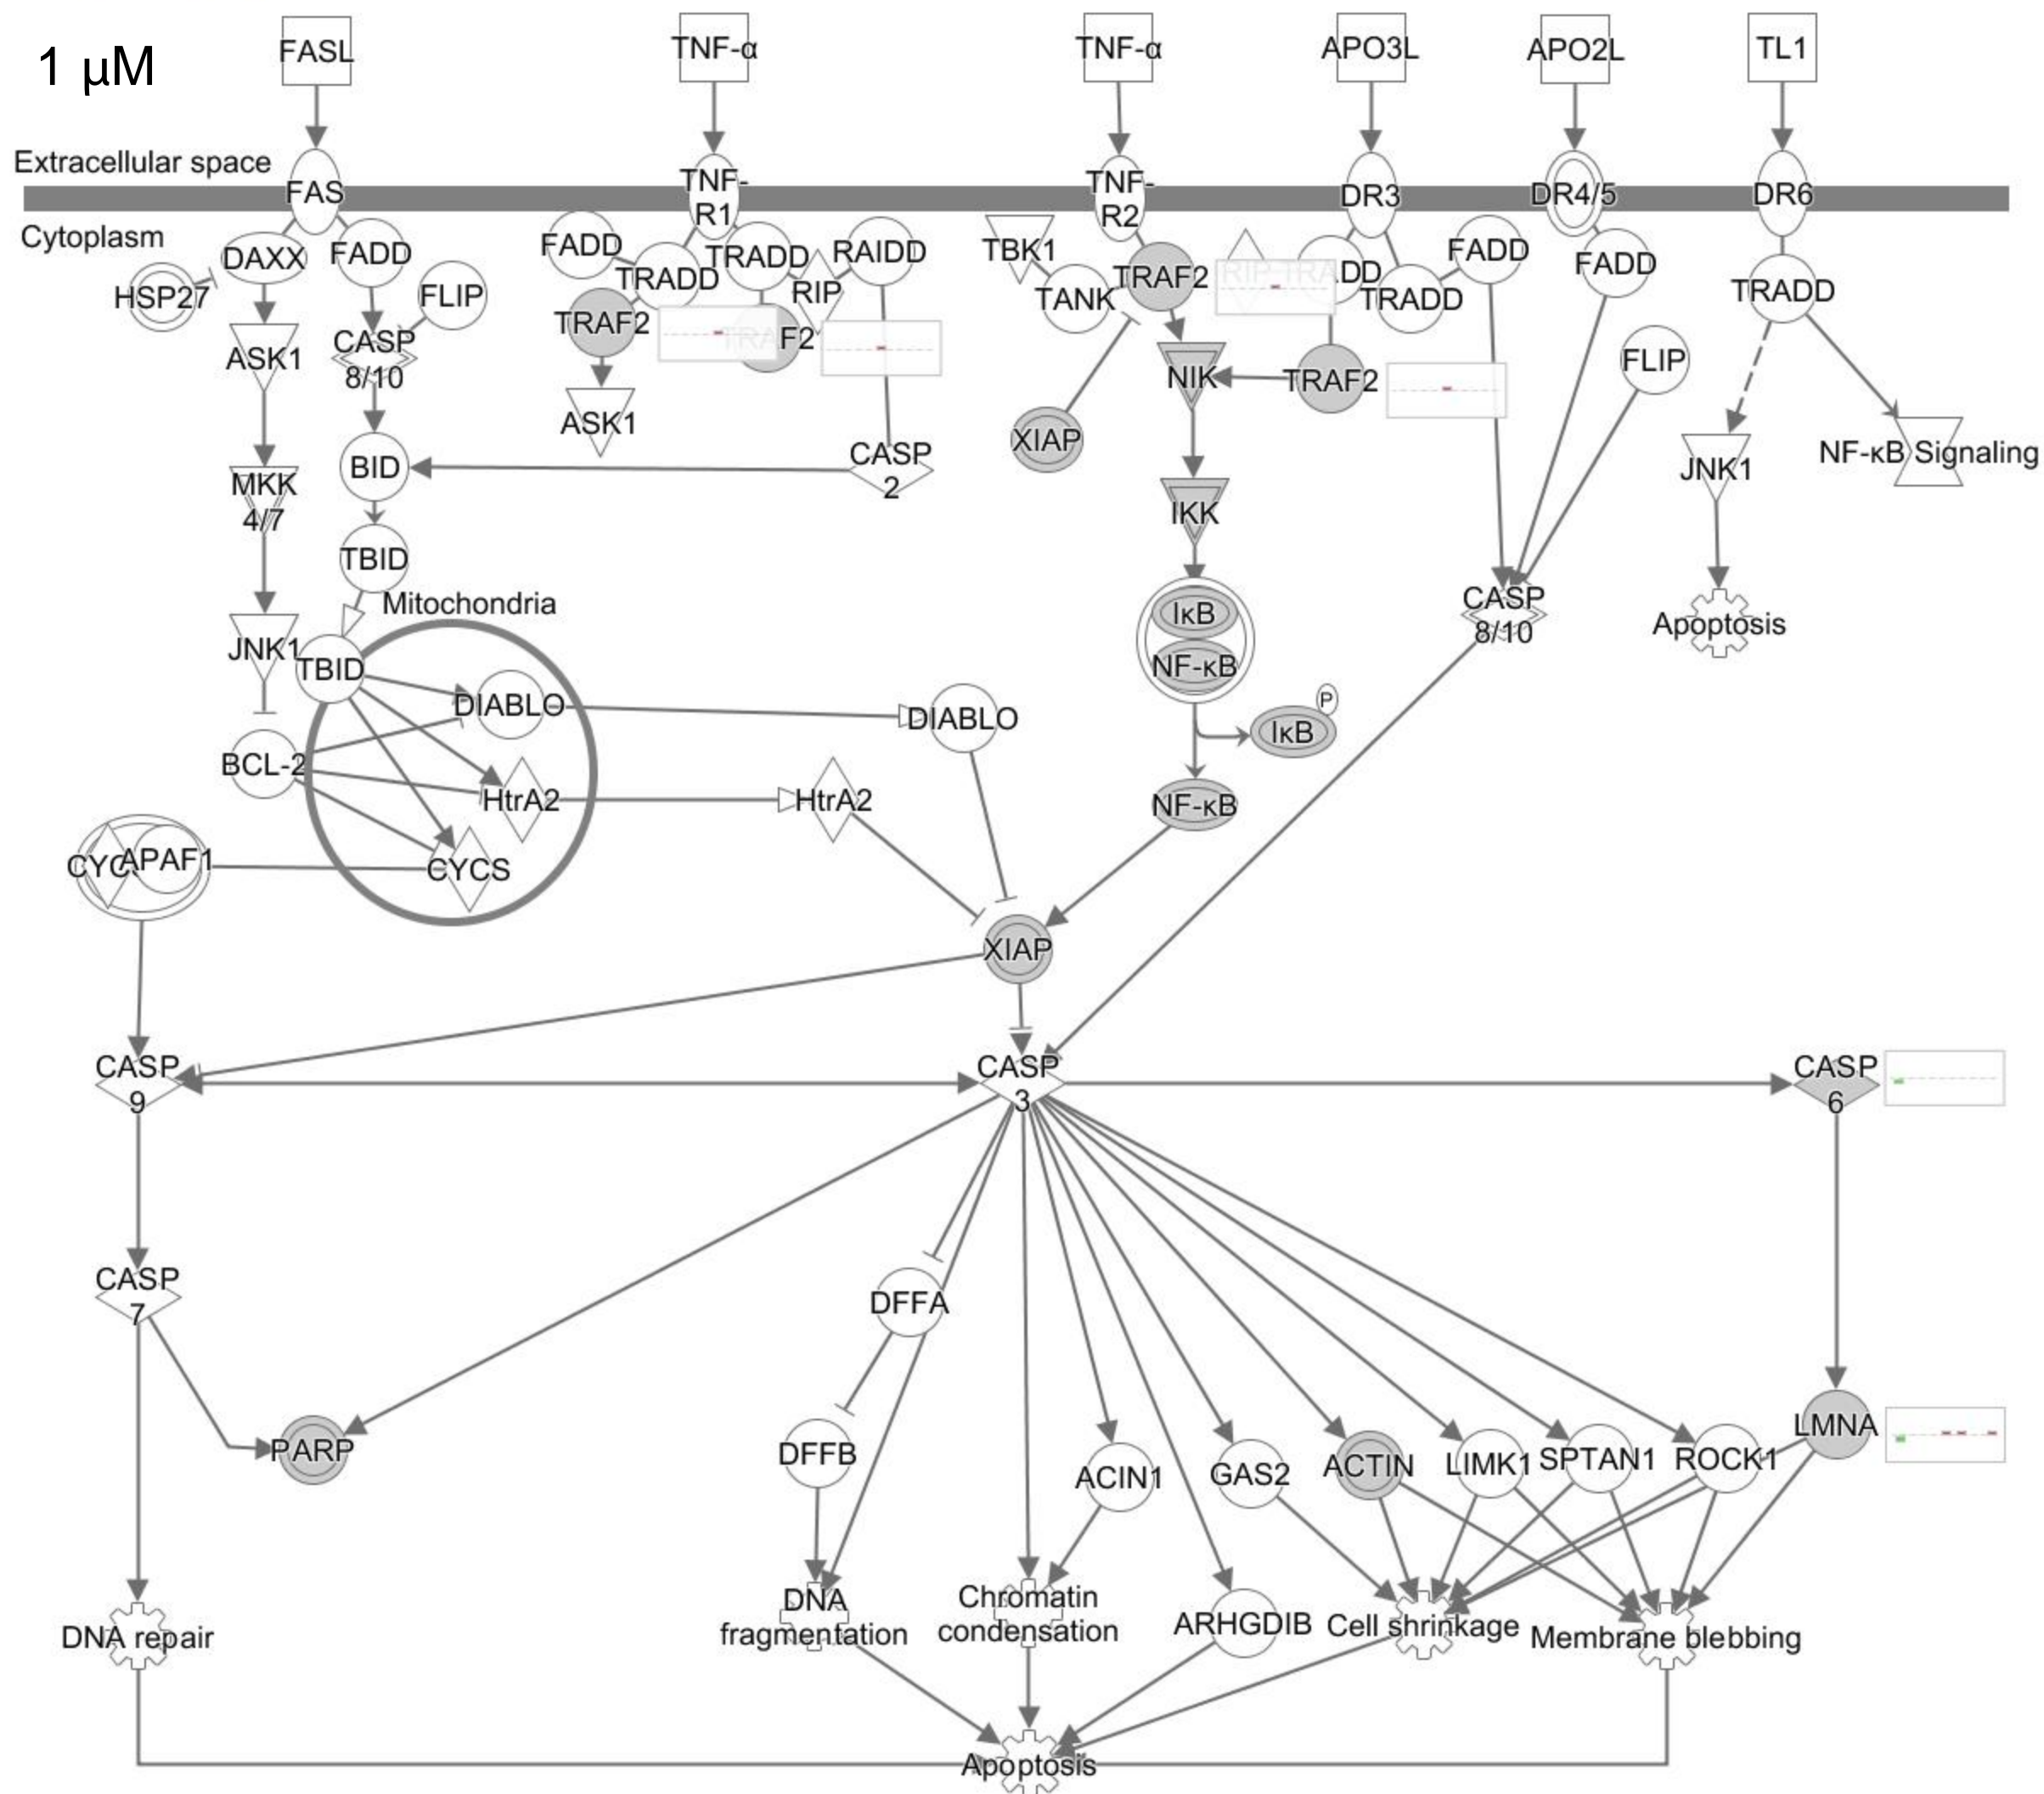

1 nM

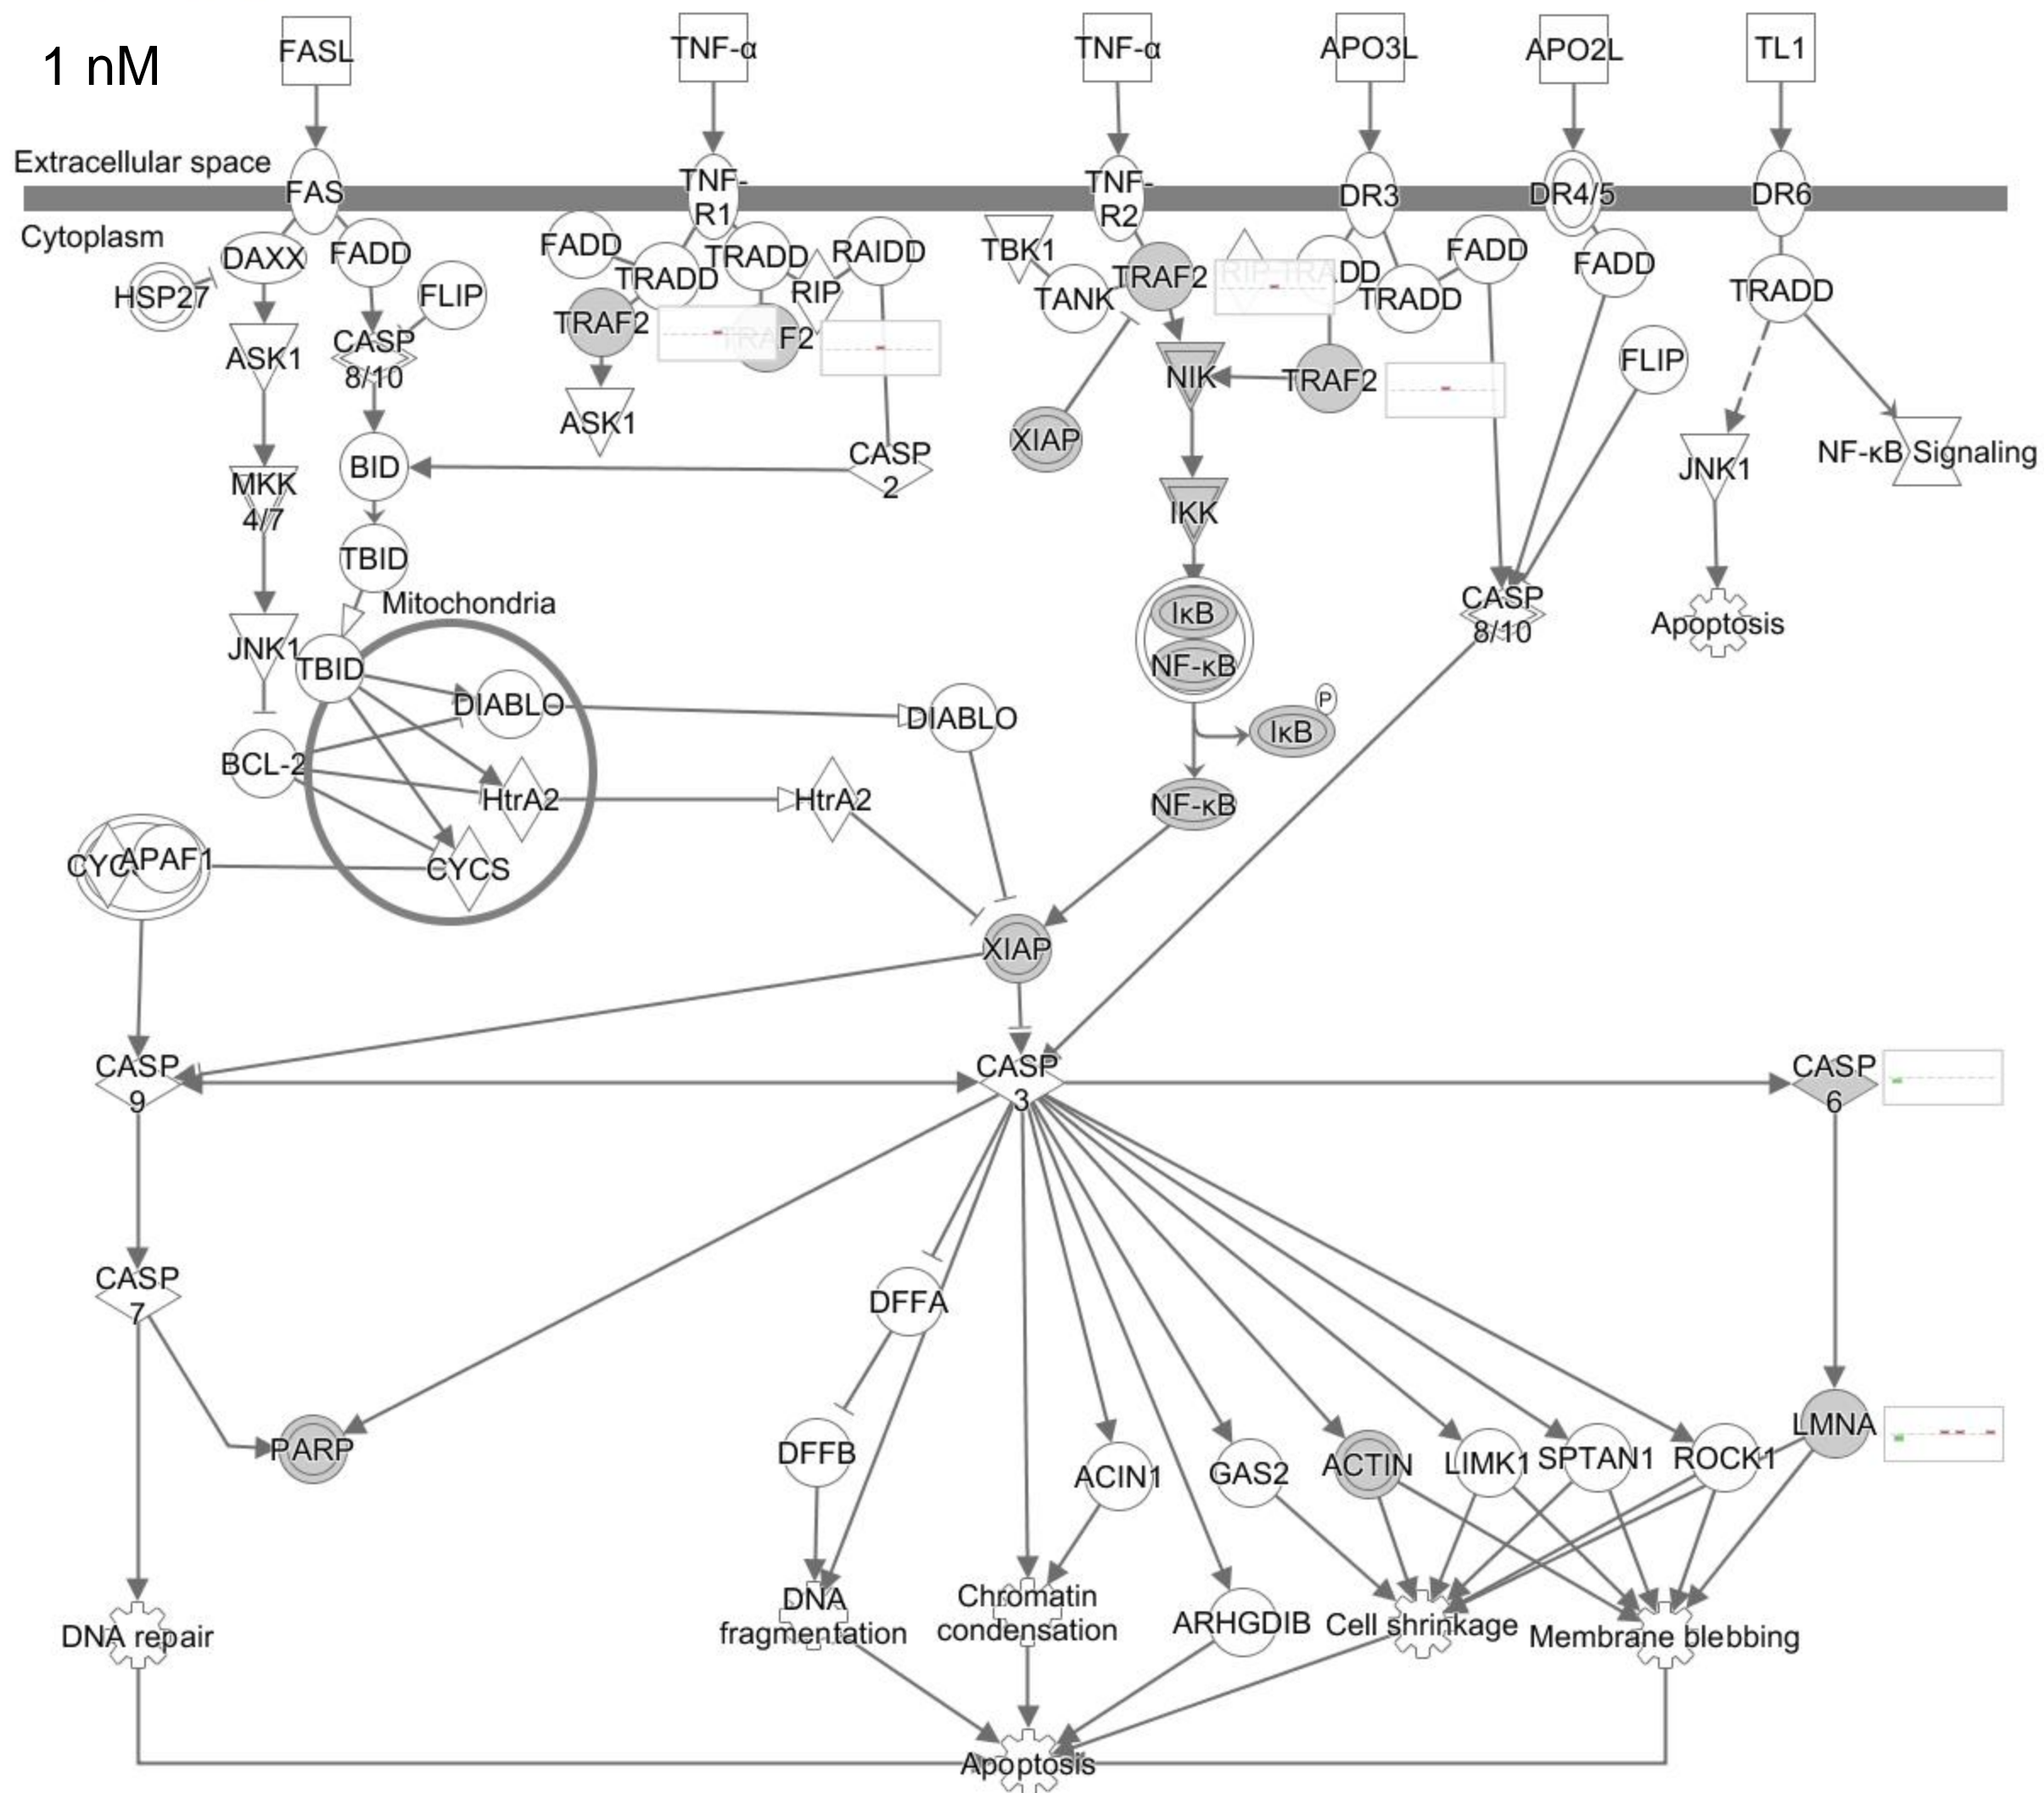

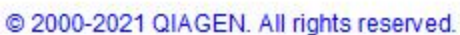

1 fM

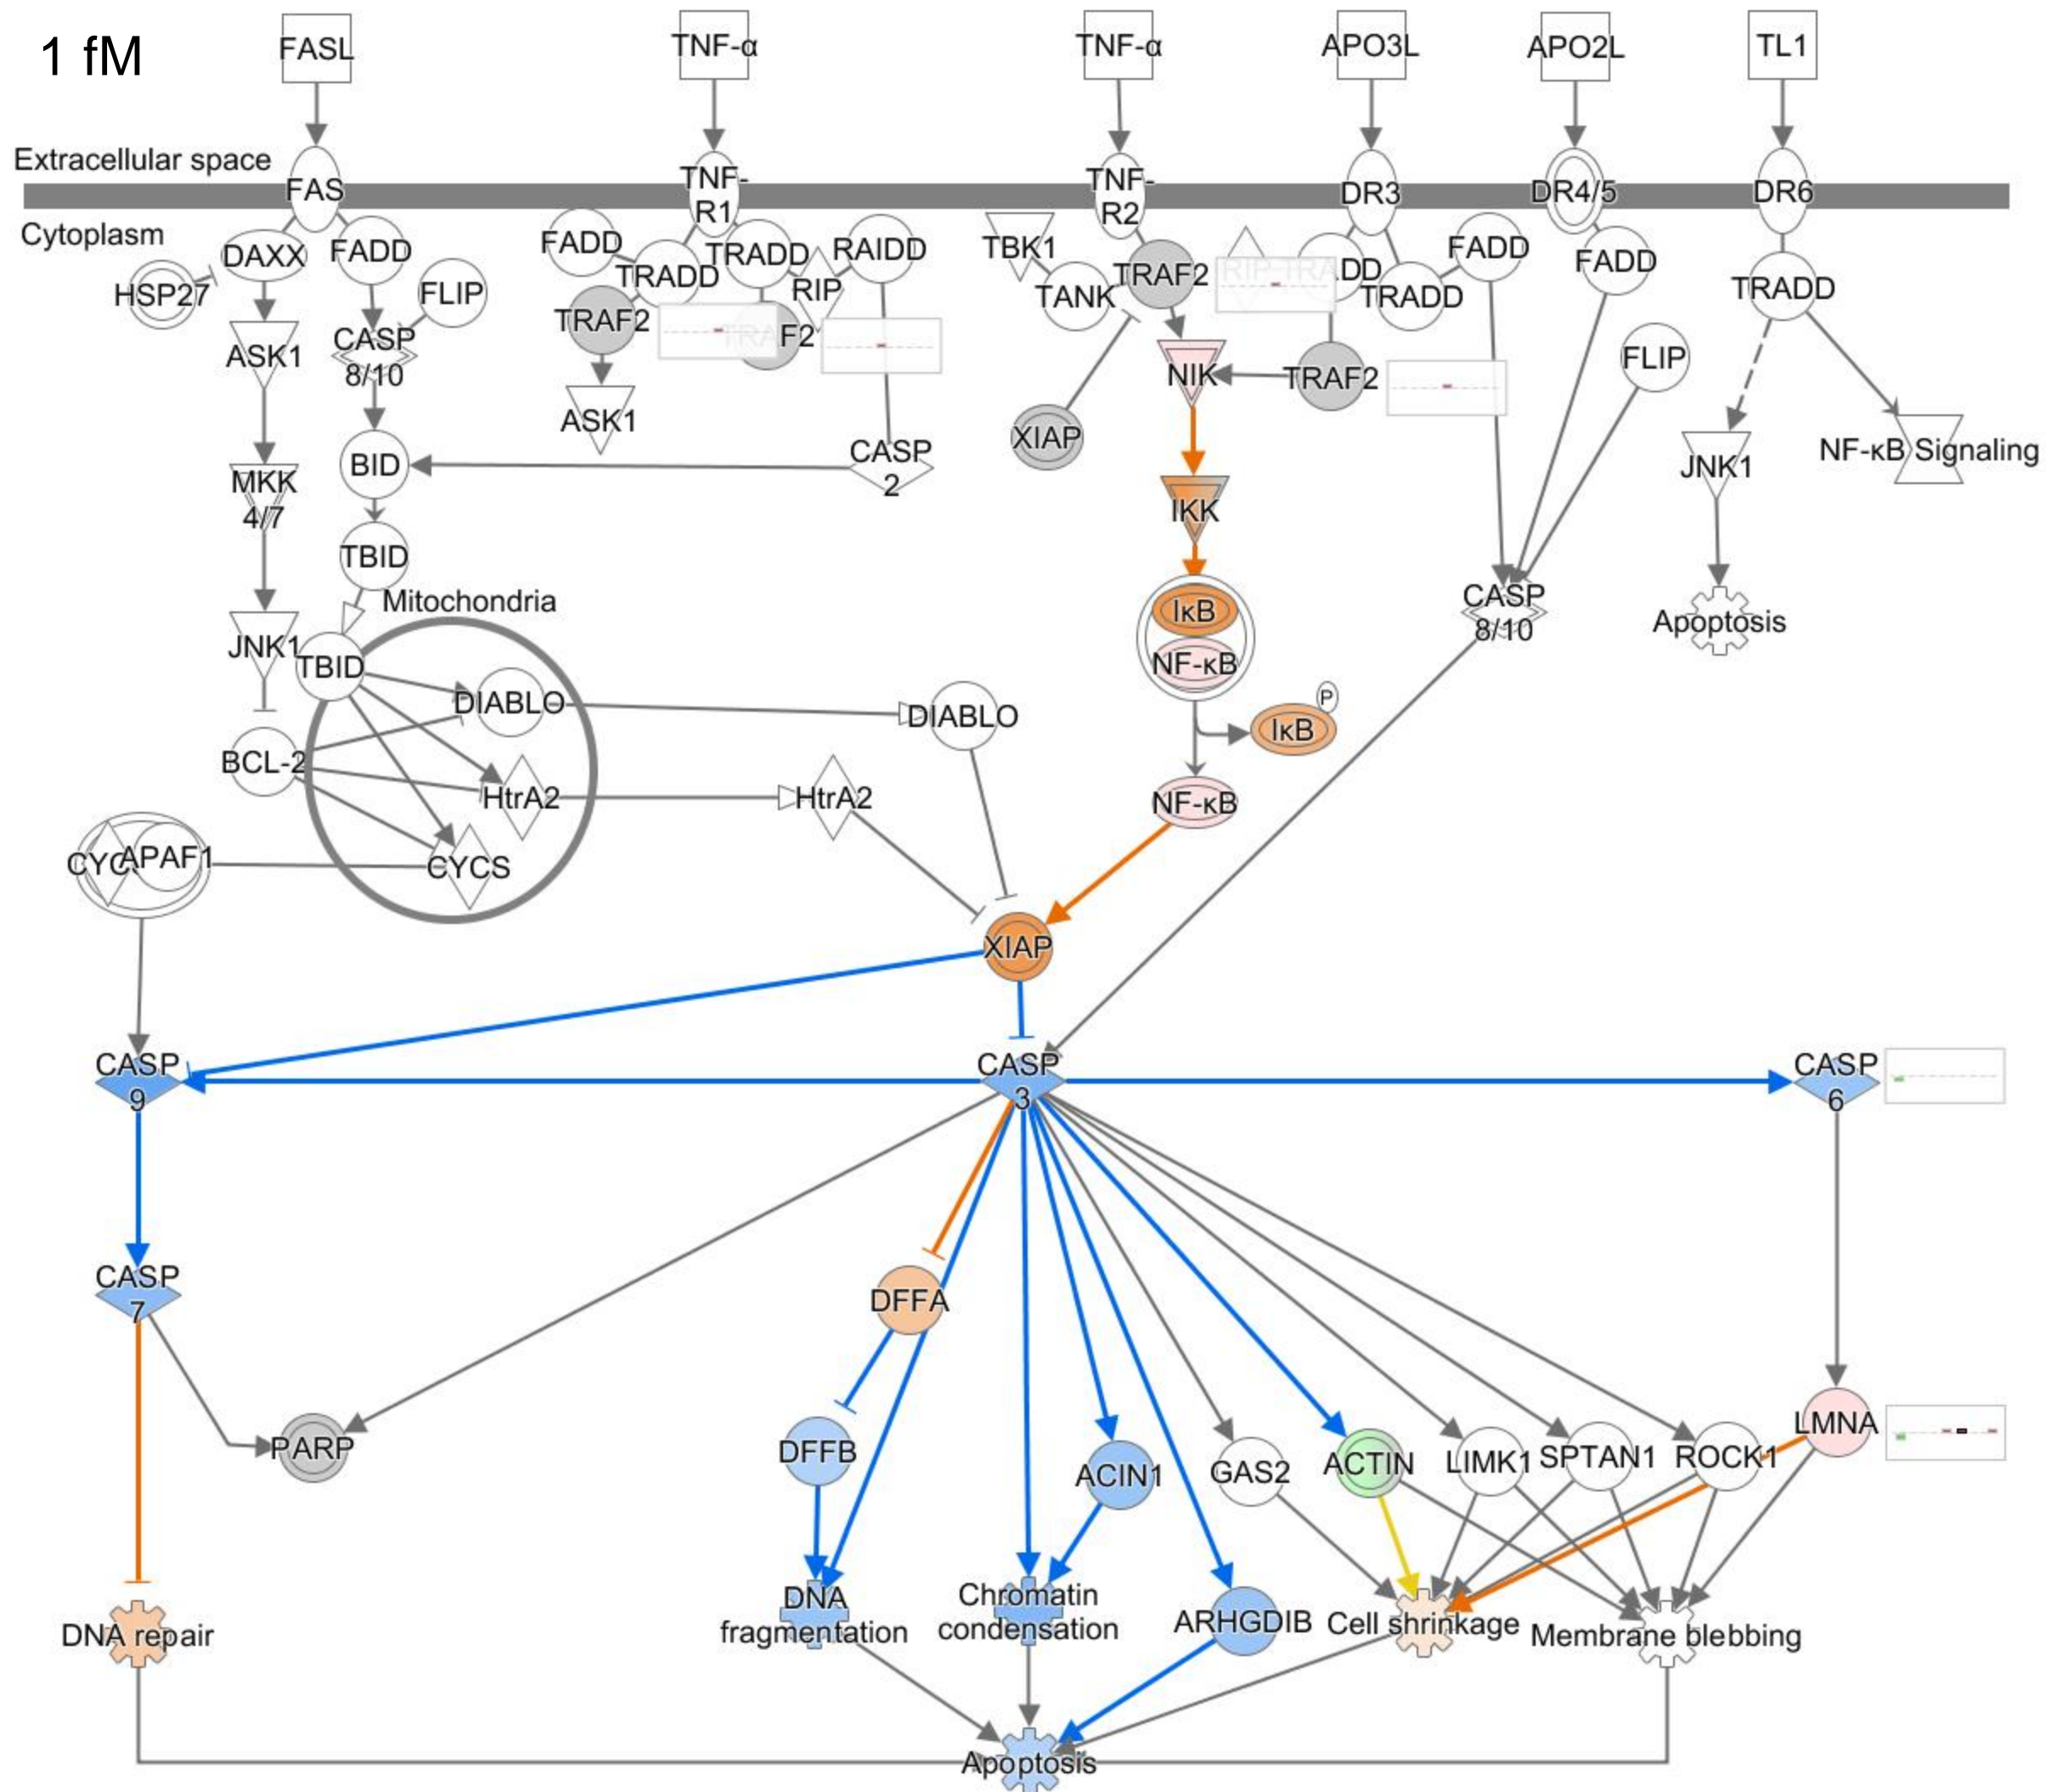

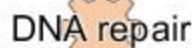

1 aM

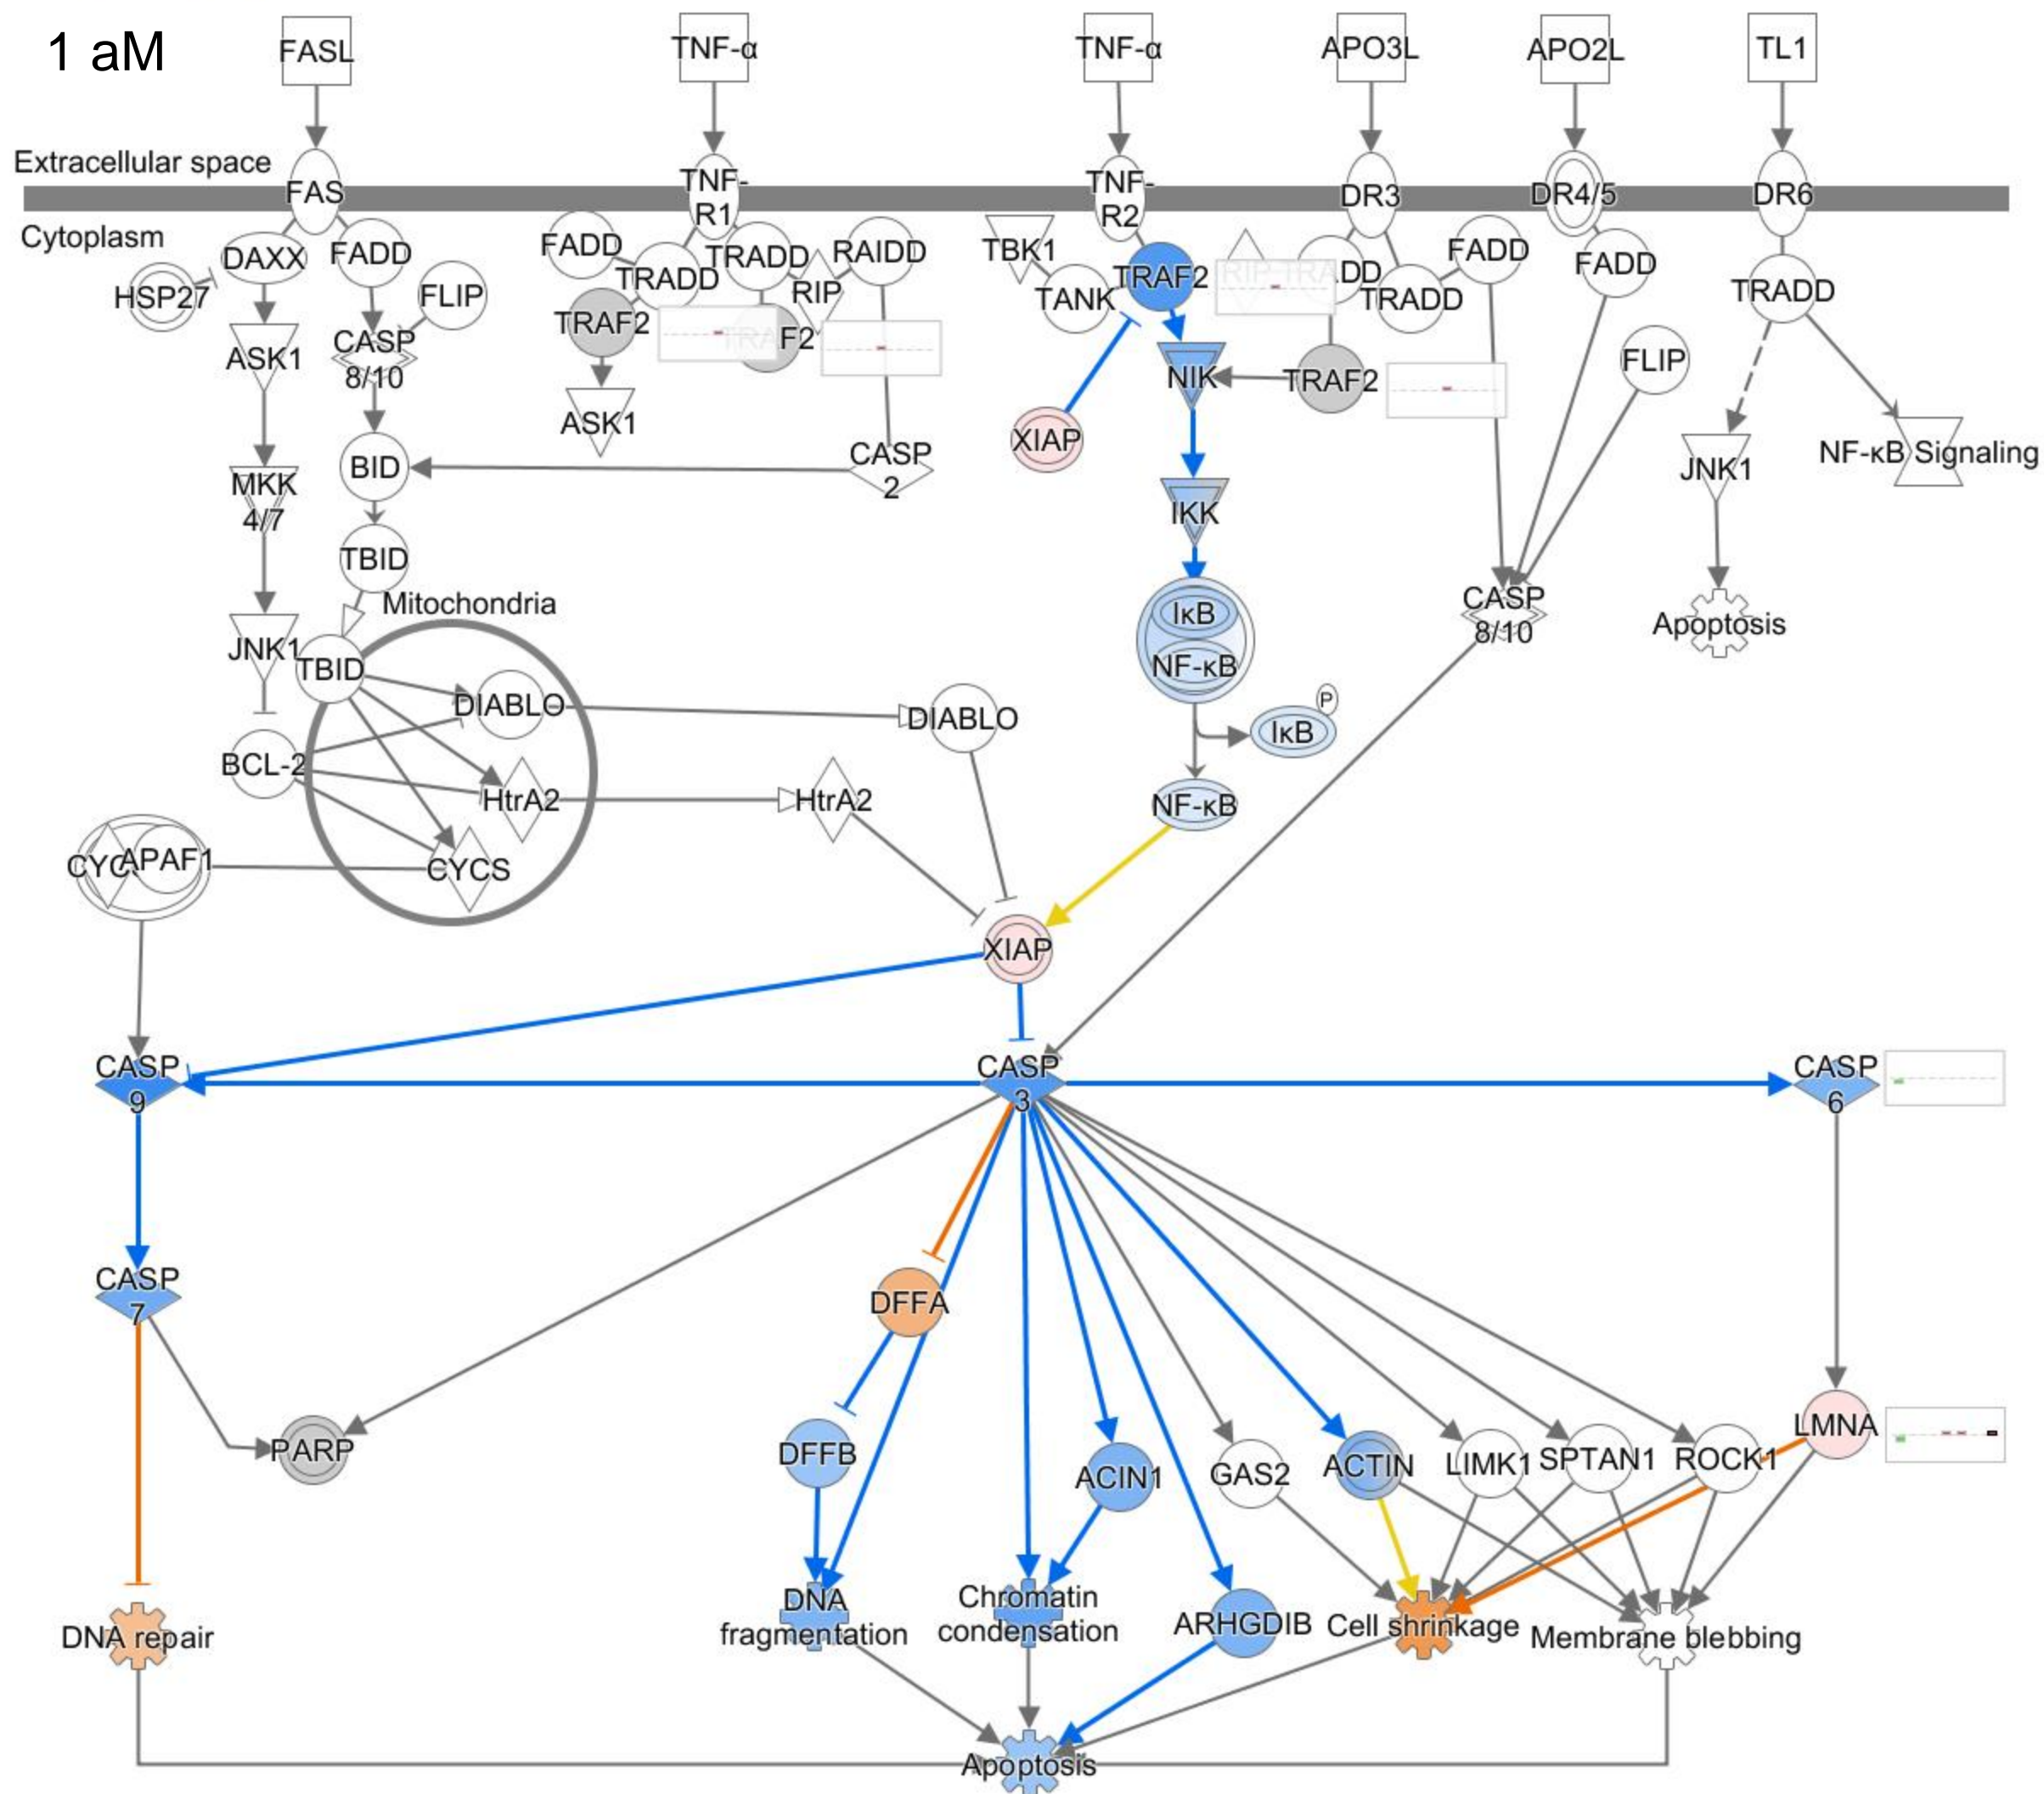

Supplement: Supplementary file 7 [file supplementary]

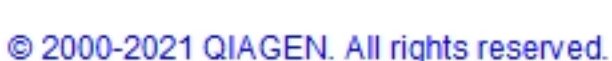

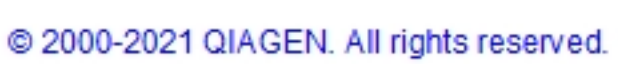

1 nM

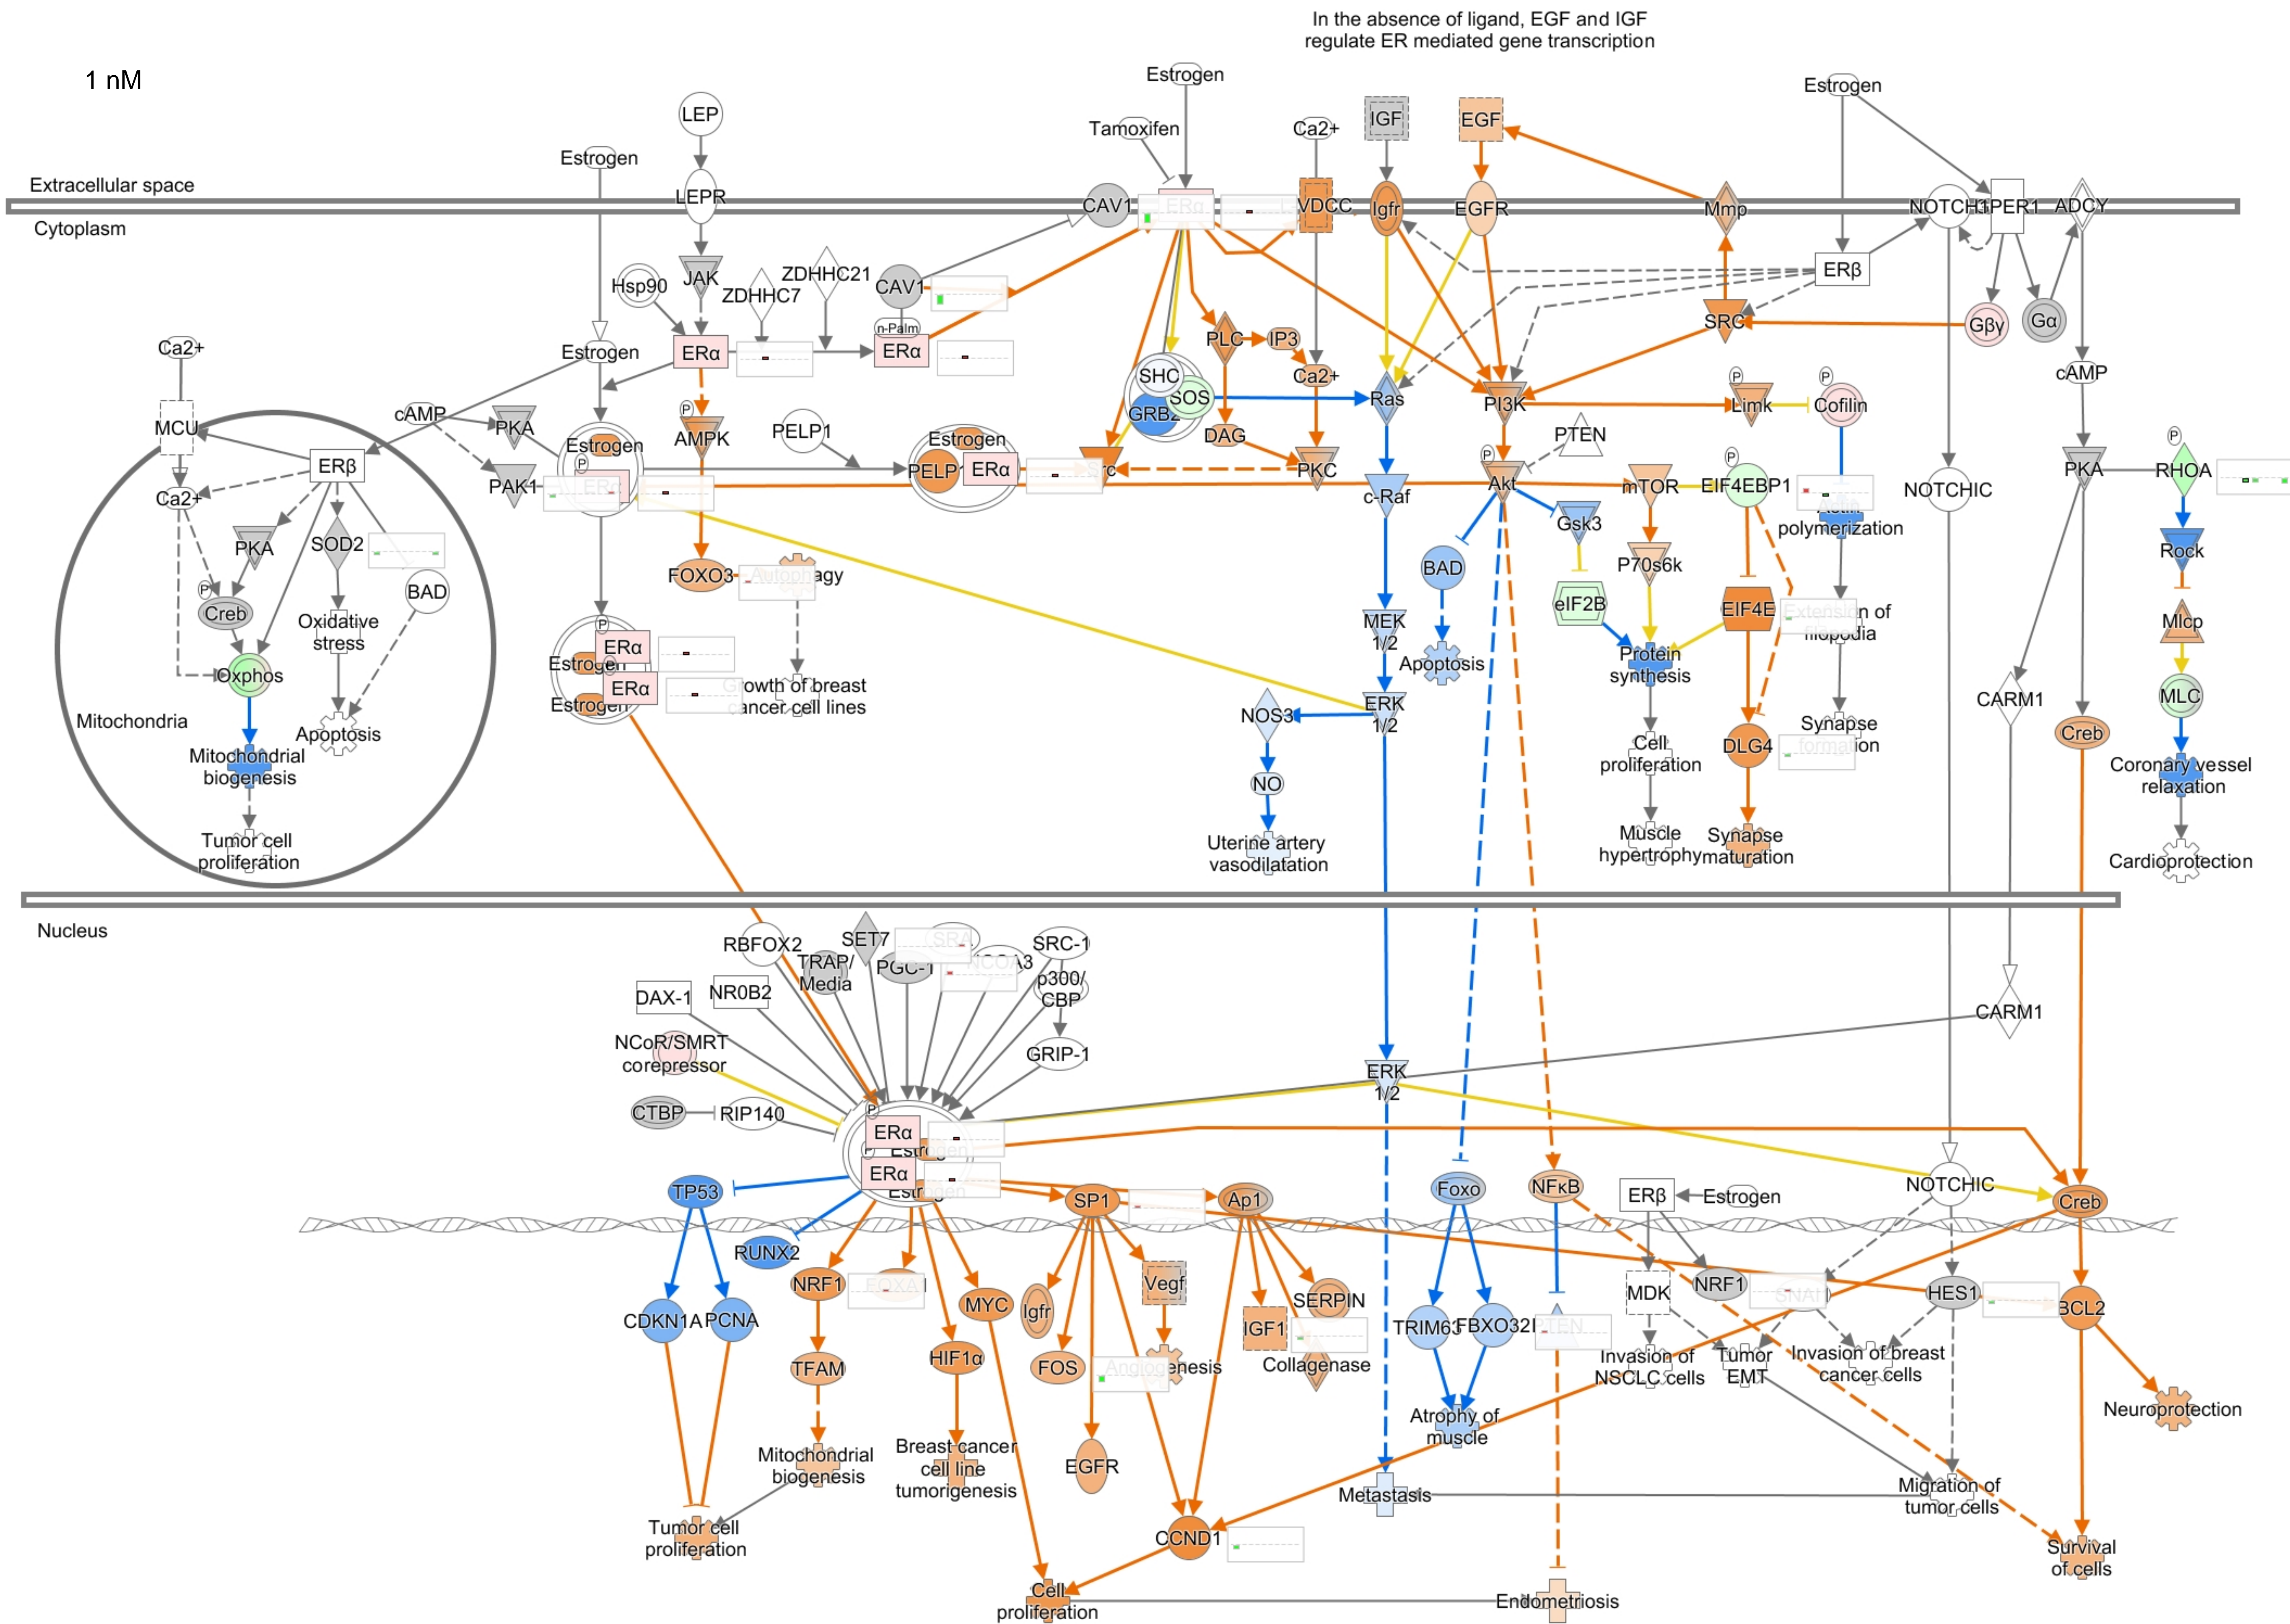

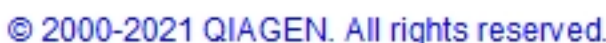

1 fM

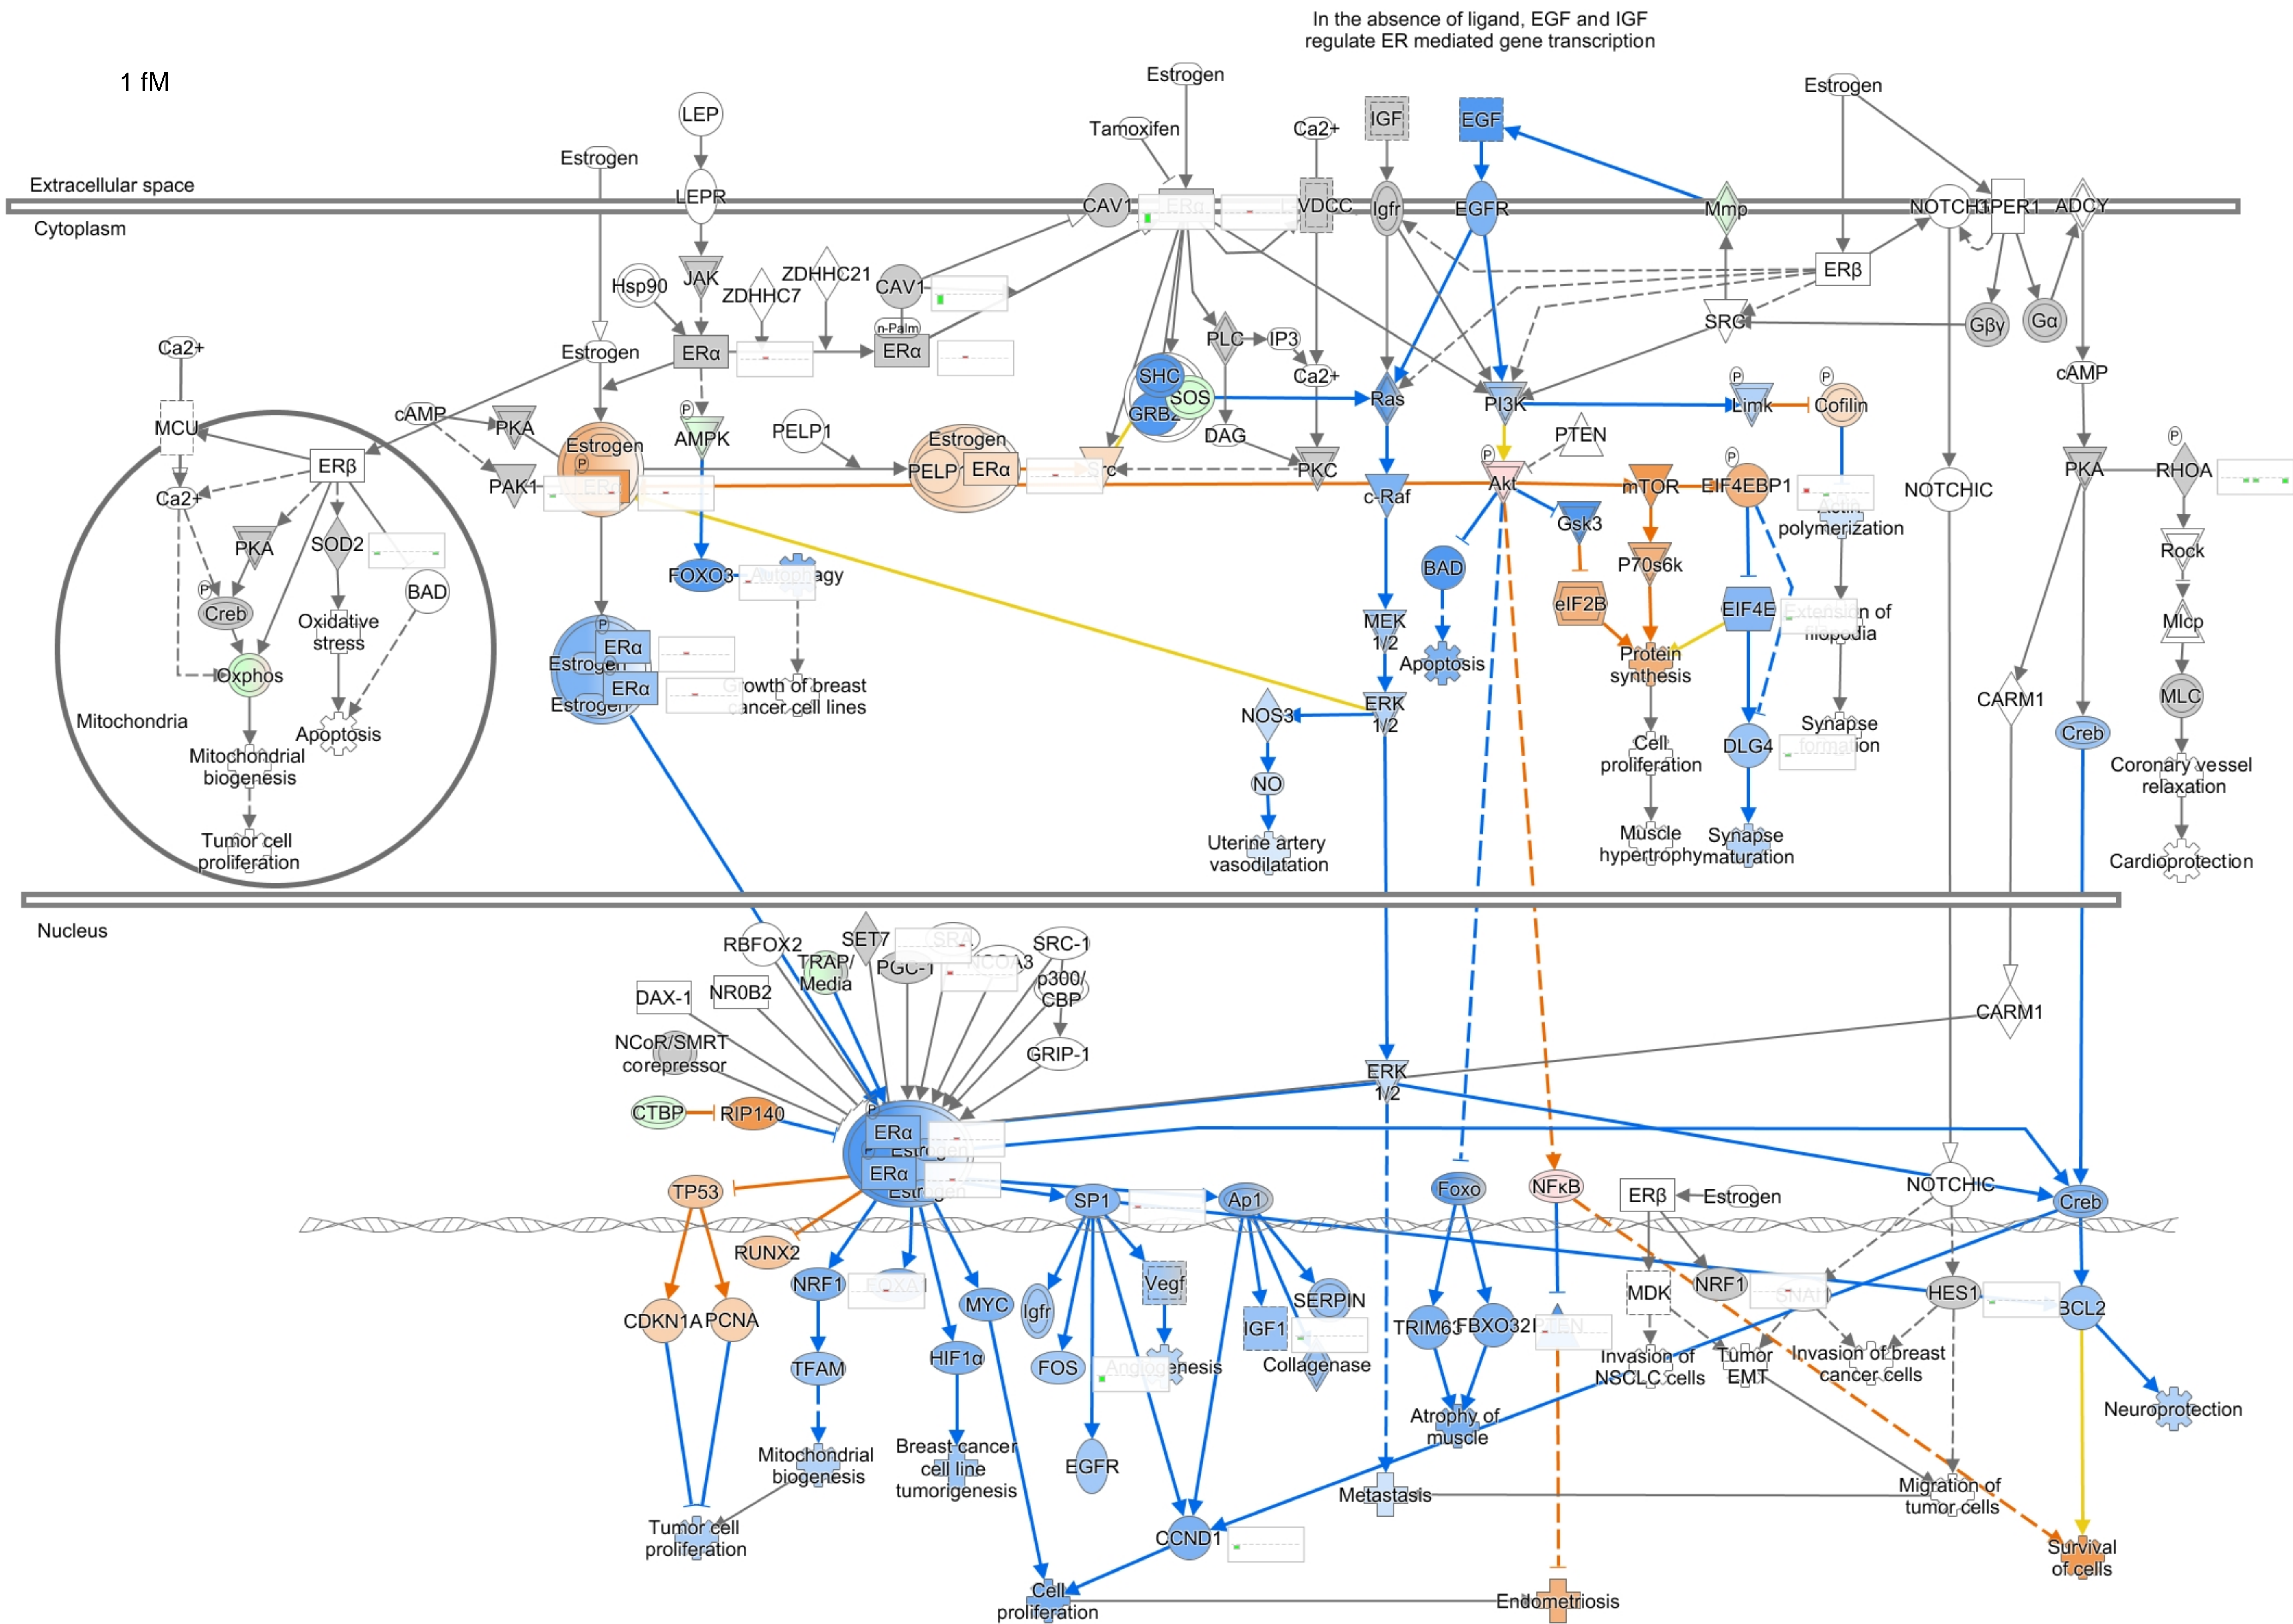

10 aM

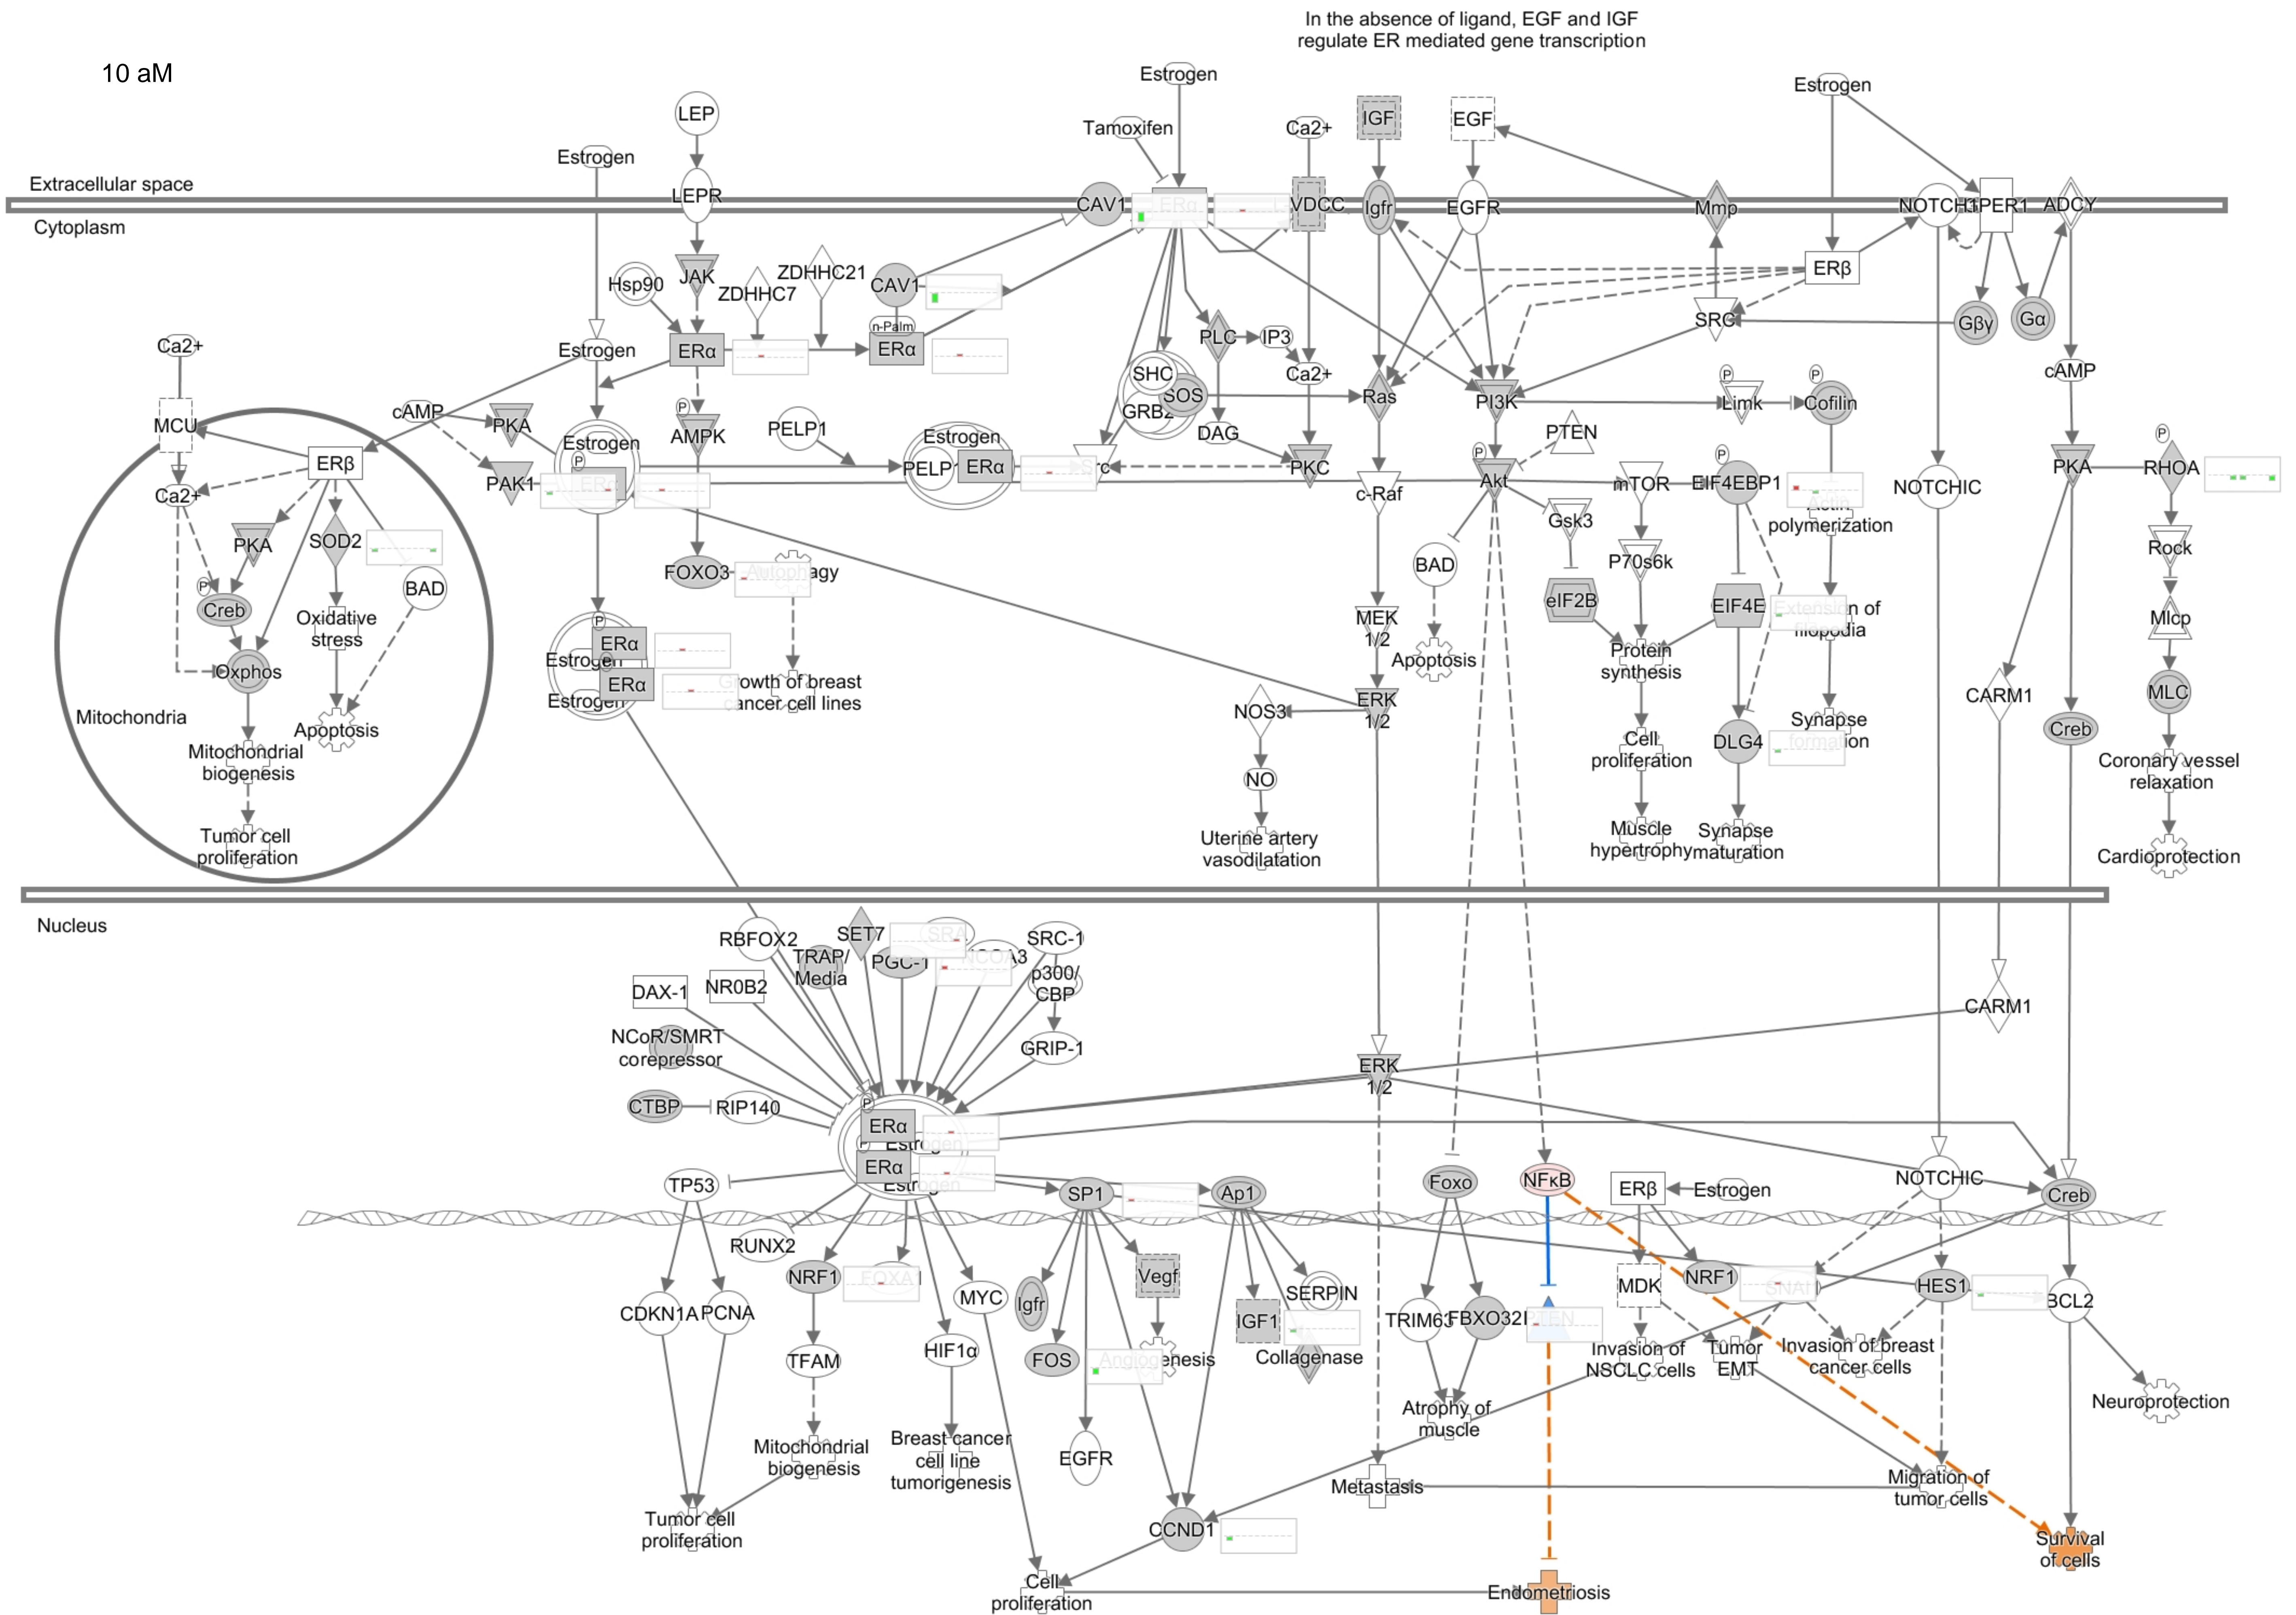

1 aM

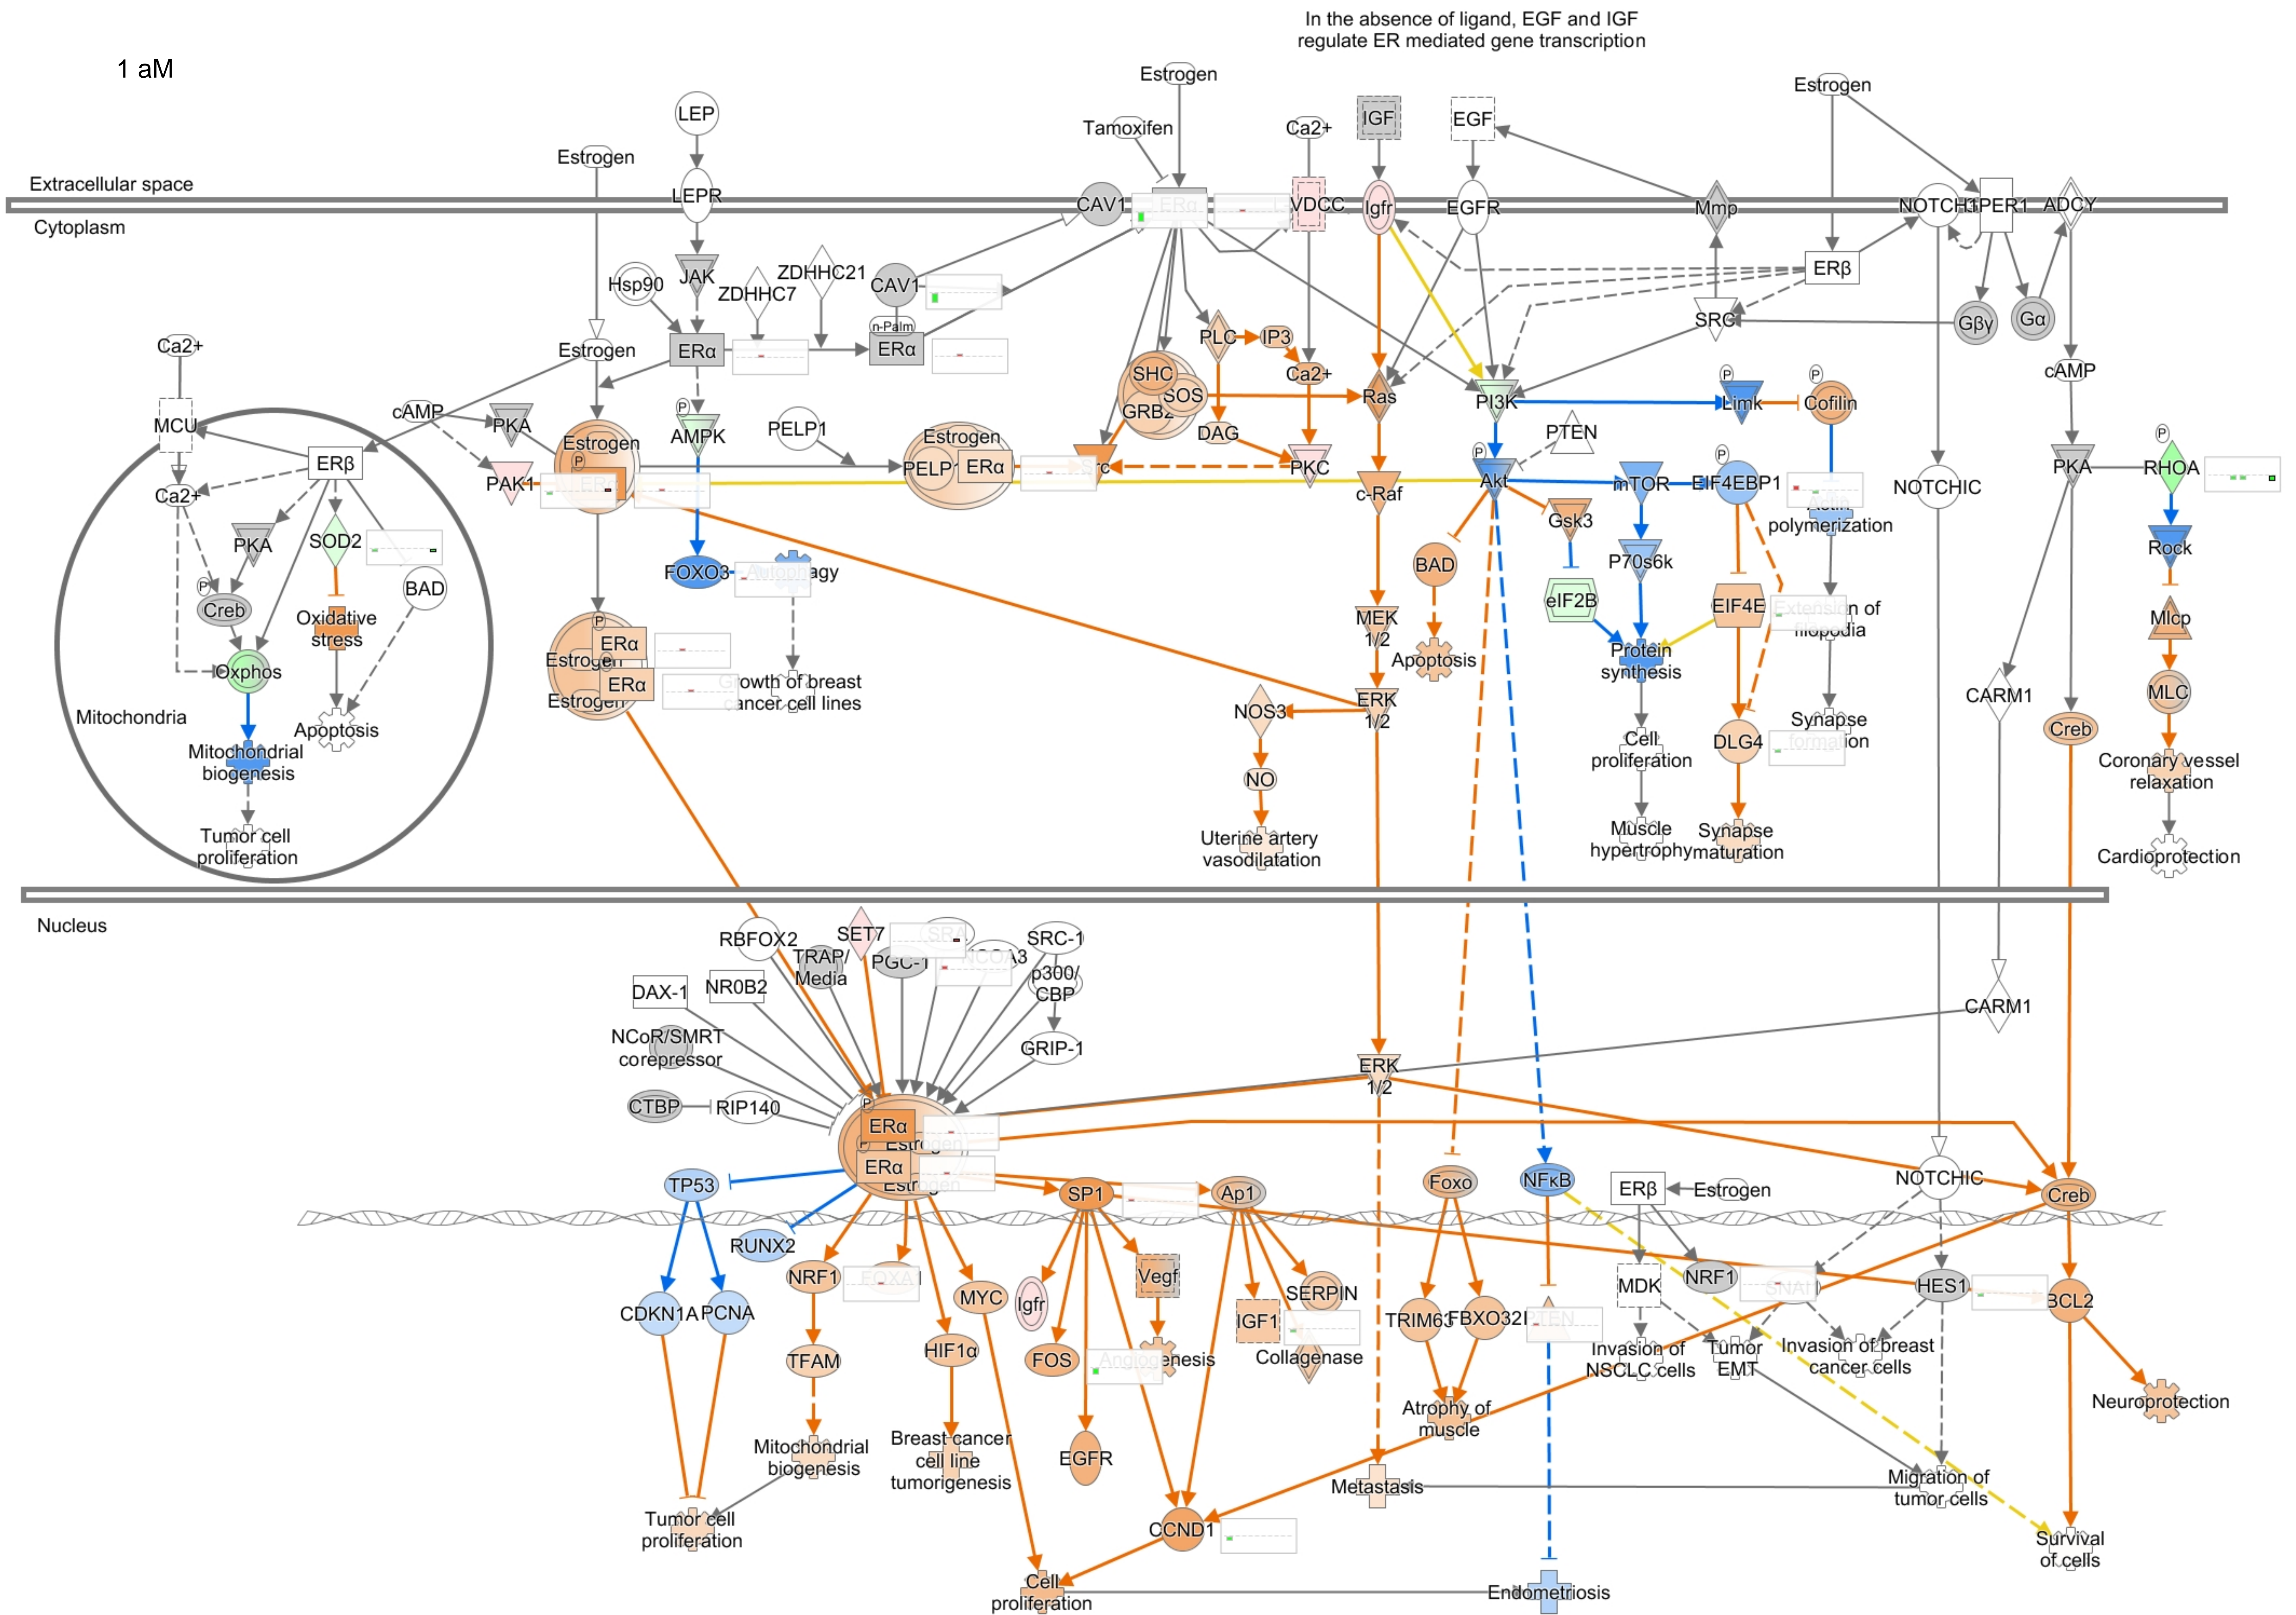

Supplement: Supplementary file 8 [file supplementary]
